# Supplementary material for: Genome-Wide Profiling of Cardinium-Responsive MicroRNAs in the Exotic Whitefly, Bemisia tabaci (Gennadius) Biotype Q
Source: Front Physiol. 2018 Nov 12;9:1580. doi: 10.3389/fphys.2018.01580 (PMC6241202; doi:10.3389/fphys.2018.01580)
Supplement: Supplementary file 3 [file Table_3.XLSX]

## Sheet: Sheet1
Table S3 List of all the novel miRNAs identified in C+ and C*- strains
sRNA	Sequence(5`-3`)	Potential miRNA	Reads				Normalrized reads				significant
			C+1	C+2	C*-1	C*-2	C+1 (TPM)	C+2 (TPM)	C*-1 (TPM)	C*-2 (TPM)		P-value	padj
novel_1	UGAGAUCAUCGUGAAAGCUGAU	ame-bantam	696731	609948	663346	683269	217958	251625	178989	163012	TRUE	0.00106	0.010597
novel_10	UAAGGAACUAGGAAUGAGAUG	tca-miR-2944b-5p	5117	3910	6576	6888	1600.75	1613.01	1774.38	1643.32	FALSE	0.31156	0.6065
novel_100	GUAGAUUUGAAGAACUUCCAUU	gma-miR5376	14	10	14	16	4.37961	4.12535	3.77758	3.81723	FALSE	0.48296	0.76469
novel_102	CGGGGGAAGUUAUAUCGCAGAUG	pxy-miR-965	17	5	20	22	5.31809	2.06267	5.39654	5.24869	FALSE	0.66123	0.81813
novel_103	UGUUUCGGCACCAUGUCACGA	mmu-miR-592-3p	4	0	2	3	1.25132	0	0.539654	0.715731	NA	0.87988	NA
novel_107	UUCCCAAGAGUGAAAGAGAGUGC	eca-miR-9127	1	0	8	12	0.312829	0	2.15861	2.86292	NA	0.01762	NA
novel_11	ACUUUGGUAAAAACAGCUGUGG	mdo-miR-7260-5p	5198	3727	5656	6363	1626.09	1537.52	1526.14	1518.07	FALSE	0.030708	0.12454
novel_110	AUACAGGGGAGUAAGGGUUUGU	mdo-miR-7398j-5p	5	7	12	15	1.56415	2.88774	3.23792	3.57865	FALSE	0.60569	0.80261
novel_111	UUCUACGAUCAAAUUGAGCCCA	*	3	2	2	3	0.938487	0.82507	0.539654	0.715731	NA	0.57236	NA
novel_112	UUUCACUCCAUCAAUUCUAGAC	ptc-miR-7812	7	1	8	6	2.1898	0.412535	2.15861	1.43146	NA	0.85388	NA
novel_114	UAUUACUUCUAGGCAUGAAAAG	*	1	1	0	3	0.312829	0.412535	0	0.715731	NA	0.919	NA
novel_115	GUAGAGUAUGGGAACUUUCUG	sme-miR-61a-3p	0	0	0	1	0	0	0	0.238577	NA	0.61642	NA
novel_119	UAACAAAGUCUGCCUGGUUUGAG	*	4	4	5	9	1.25132	1.65014	1.34913	2.14719	NA	0.96315	NA
novel_122	ACUAAGAUGGUGAAAAAACGGA	efu-miR-9216	3	5	2	4	0.938487	2.06267	0.539654	0.954308	NA	0.29009	NA
novel_124	CAUCAUGCAUUUGUACUGCUUG	ghr-miR7502	1	2	0	4	0.312829	0.82507	0	0.954308	NA	0.81188	NA
novel_126	CAUCUAAAGCUAUAUUGCAUGUCA	cel-miR-62	1	2	3	4	0.312829	0.82507	0.80948	0.954308	NA	0.76286	NA
novel_13	ACUUUGGUUGGAAAAGCUGUCC	cbn-miR-84	2512	1453	3456	4450	785.827	599.413	932.521	1061.67	FALSE	0.10713	0.29155
novel_132	AGGGUUGAGUAAGGACAUCAAC	aca-miR-219-2-3p	1	1	2	7	0.312829	0.412535	0.539654	1.67004	NA	0.37712	NA
novel_133	UCUGAACACGCAGAAUUUGGCGUG	*	0	1	0	1	0	0.412535	0	0.238577	NA	0.7628	NA
novel_134	UUCUGACCAGGGUCUAUUCUUG	ptc-miR166p	0	0	0	1	0	0	0	0.238577	NA	0.61642	NA
novel_136	AUAGACUUUGAGAACUUUCUAU	*	0	2	0	0	0	0.82507	0	0	NA	0.29335	NA
novel_140	GUUCCGCCGGGGUCGUCGGGC	*	28051	22409	3812	1656	8775.17	9244.49	1028.58	395.083	TRUE	1.38e-17	2.02e-15
novel_150	UUGGAGCUCAUGAAUAUGCUGA	mmu-miR-8118	1	0	1	4	0.312829	0	0.269827	0.954308	NA	0.45518	NA
novel_151	CGCUUCCGGGUCCGCGGUC	*	1	0	0	1	0.312829	0	0	0.238577	NA	0.85516	NA
novel_152	UCACAGCCAGCUUUGAUGAGCACU	pxy-miR-2b	385	282	342	351	120.439	116.335	92.2808	83.7405	TRUE	0.0002493	0.003972
novel_156	UCUGCUCGCGAUUUGUGUUGAUC	hsa-miR-4762-3p	4	2	2	3	1.25132	0.82507	0.539654	0.715731	NA	0.43449	NA
novel_159	UUUCCAAAUAGAAGUUACGUGU	*	15	20	21	22	4.69244	8.2507	5.66636	5.24869	FALSE	0.3804	0.69422
novel_16	AAUGGCACUGGAAGAAUUCACG	dme-miR-263a-5p	0	0	1	0	0	0	0.269827	0	NA	0.60531	NA
novel_161	GUGGGGUUGGGGUGGGGGU	gga-miR-1594	1	0	0	1	0.312829	0	0	0.238577	NA	0.85516	NA
novel_168	UGGUGGGACAUGCUCAGACCCU	mmu-miR-1946b	81	60	107	115	25.3392	24.7521	28.8715	27.4363	FALSE	0.7645	0.86226
novel_17	UCCCUGAGACCCUAAUUUGUG	mmu-miR-125b-5p	2697	1591	3675	3796	843.7	656.343	991.614	905.638	FALSE	0.50716	0.76469
novel_170	UAUGUACCGAACUACUUCAAUU	prd-miR-7971-5p	1	1	11	7	0.312829	0.412535	2.96809	1.67004	NA	0.060807	NA
novel_171	UCUUCACUGUGAGGCAUUAUUCG	mdv1-miR-M1-5p	1	0	1	1	0.312829	0	0.269827	0.238577	NA	0.8766	NA
novel_172	UACCCGAUCCUAAAUCCGUUUU	*	0	0	1	2	0	0	0.269827	0.477154	NA	0.31817	NA
novel_179	AUCAAUCUCUGGAUAUAACCG	*	1	1	3	0	0.312829	0.412535	0.80948	0	NA	0.95131	NA
novel_180	UUGUGGGCAUACUGGCACGGCUUG	zma-miR394a-3p	14	9	30	16	4.37961	3.71281	8.0948	3.81723	FALSE	0.63886	0.81813
novel_181	UUGGCCUUCUGCUGACAUGACG	mmu-miR-680	3	0	2	2	0.938487	0	0.539654	0.477154	NA	0.9286	NA
novel_182	AGUGGAUUUAAGAACUUUCUGU	dre-miR-148	3	0	4	6	0.938487	0	1.07931	1.43146	NA	0.43471	NA
novel_183	UGUCUUUUCCCGCUUUGCUG	ame-miR-316	1805	963	2455	2444	564.656	397.271	662.425	583.082	FALSE	0.46765	0.75863
novel_19	UCGAUUCCCGGUACCGGAACAA	*	41	20	107	144	12.826	8.2507	28.8715	34.3551	TRUE	7.89e-05	0.0019194
novel_193	CAAGCUCGUUGAAGUAUACCCAU	pma-miR-133a	55	23	109	181	17.2056	9.4883	29.4111	43.1824	TRUE	0.0022765	0.020773
novel_194	CUGUACGCUCCUCCAUGCAUUA	*	3	0	2	3	0.938487	0	0.539654	0.715731	NA	0.92894	NA
novel_199	UGUCUUUUCCCUCUUAGUUGG	dme-miR-316-5p	1134	782	1271	1109	354.748	322.602	342.95	264.582	FALSE	0.037079	0.13443
novel_20	UGGAAGACUAGUGAUUUUGUUGUU	ssc-miR-7	14	13	18	24	4.37961	5.36295	4.85688	5.72585	FALSE	0.82906	0.86459
novel_204	CUAGAUUUUGGAAAGGCCUGCU	rmi-miR-5319	4	0	2	1	1.25132	0	0.539654	0.238577	NA	0.61203	NA
novel_205	UAAGGAACUGUUUGAUGUGGUGA	mghv-miR-M1-6-3p	7	4	9	7	2.1898	1.65014	2.42844	1.67004	NA	0.84166	NA
novel_207	UUUUUUAUACCGUUUUGCCACG	*	2	0	2	3	0.625658	0	0.539654	0.715731	NA	0.69278	NA
novel_209	UGGGACAUACUGAGACCCUUG	eca-miR-1302	2	1	7	3	0.625658	0.412535	1.88879	0.715731	NA	0.43893	NA
novel_210	UCACCGGGUGGAUAAUCGCUGC	cel-miR-35-3p	6	4	14	9	1.87697	1.65014	3.77758	2.14719	FALSE	0.54489	0.77609
novel_216	UGUUUACGAUUUUAUCAGGAGU	sme-miR-12-5p	2	2	2	1	0.625658	0.82507	0.539654	0.238577	NA	0.4519	NA
novel_22	UGAGGUAGUAGGUUGUAUAGU	cel-let-7-5p	6	1	8	12	1.87697	0.412535	2.15861	2.86292	NA	0.37231	NA
novel_226	AACCCGUAGAUCCGAACUUGUG	hsa-miR-100-5p	6876	5903	10067	10072	2151.01	2435.19	2716.35	2402.95	FALSE	0.6212	0.80261
novel_227	UACCAGUCUUGGAGGCCUCUCA	*	84	66	75	115	26.2776	27.2273	20.237	27.4363	FALSE	0.20137	0.42224
novel_228	ACGUAUACUAAAUGUAUCCUGA	api-miR-iab-4	5	4	3	8	1.56415	1.65014	0.80948	1.90862	NA	0.63945	NA
novel_229	UUGAUCAACUGAAGAACAUGGG	mdo-miR-7386k-5p	7	4	19	29	2.1898	1.65014	5.12671	6.91873	FALSE	0.034701	0.13333
novel_238	AAGUGCCUGAUGGAUGCCUCAAU	hvu-miR6182	13	14	34	38	4.06678	5.77549	9.17411	9.06592	FALSE	0.18668	0.41296
novel_239	UCUGUGGCGGGUAAUUCAGCAU	gga-miR-6681-5p	0	1	0	0	0	0.412535	0	0	NA	0.41642	NA
novel_24	UAUCACAGCCAUUUUUGACGUG	bmo-miR-13b-3p	1839	1227	1626	1388	575.293	506.18	438.738	331.145	TRUE	0.0002035	0.003972
novel_240	UGUGUCAUCCUGAGCUUUCCU	*	55	33	64	70	17.2056	13.6136	17.2689	16.7004	FALSE	0.72993	0.84126
novel_245	GCGUGUCUCAAUCGGCUGUGUAAU	tur-miR-210-3p	1	3	5	4	0.312829	1.2376	1.34913	0.954308	NA	0.78571	NA
novel_250	GCUUUAAGAUUGACAGACUUUA	*	2	1	4	4	0.625658	0.412535	1.07931	0.954308	NA	0.59743	NA
novel_253	AUCUGACUUUGGAAAGACUUGC	prd-miR-7916-3p	7	2	11	12	2.1898	0.82507	2.96809	2.86292	NA	0.41329	NA
novel_254	UGAAAAUAUGUUGCGCGUAAUA	*	0	0	1	1	0	0	0.269827	0.238577	NA	0.40588	NA
novel_256	AAGCAUUGUAUCGAACCCUAAAACA	ppc-miR-2235a-9-3p	22	11	6	6	6.88224	4.53788	1.61896	1.43146	TRUE	0.0010887	0.010597
novel_259	UGAGAUUCAACUCCUCCAUCUU	tca-miR-1175-3p	18	6	30	46	5.63092	2.47521	8.0948	10.9745	FALSE	0.074842	0.23249
novel_26	UUCGUUGUCGCCGAAAACUCGU	dme-miR-981-3p	1542	840	2019	2271	482.382	346.529	544.78	541.808	FALSE	0.37011	0.68534
novel_260	CAACCUGUGCUUUGUUUCAUCU	pma-miR-4563	0	0	4	1	0	0	1.07931	0.238577	NA	0.21602	NA
novel_263	AACUUUAUAAUUUUCAGCAUUUU	gra-miR7504k	3	2	4	3	0.938487	0.82507	1.07931	0.715731	NA	0.84753	NA
novel_264	UAUGCAGAUAUGUGCUCUUGUGGGA	bmo-miR-2818	0	0	2	2	0	0	0.539654	0.477154	NA	0.2424	NA
novel_265	ACGUCCAUCGGAUAUUCCAGA	gga-miR-1626-3p	1	1	4	2	0.312829	0.412535	1.07931	0.477154	NA	0.60056	NA
novel_27	GUGAGCAACGUAUCAGGUGUCU	cte-miR-87b	2016	1959	1569	1407	630.663	808.156	423.358	335.678	TRUE	2.05e-05	0.00059906
novel_28	ACCCUGUAGAUCCGAAAUUUGU	dme-miR-10-5p	1085	844	1996	2108	339.42	348.179	538.574	502.92	FALSE	0.055017	0.1785
novel_29	CCUUGAGCUAAAUGAAUAAAUU	eca-miR-664	666	856	749	635	208.344	353.13	202.1	151.496	FALSE	0.013807	0.071992
novel_3	UCGGUGGGACUUUCAUCUGACU	lva-miR-278-3p	46814	26165	75794	88359	14644.8	10794	20451.3	21080.4	TRUE	0.0028961	0.022255
novel_30	ACUUUGGUAGGAAAAGCUGUUA	*	1116	825	1616	1842	349.117	340.341	436.04	439.459	FALSE	0.57454	0.77609
novel_31	UGGACGGAAAACUGAUAAGGGU	mmu-miR-184-3p	84	74	161	148	26.2776	30.5276	43.4421	35.3094	FALSE	0.45753	0.75055
novel_34	UGAAAGACAUGGGUAGUGAGAU	sme-miR-71c-5p	0	0	3	1	0	0	0.80948	0.238577	NA	0.25661	NA
novel_36	CAAAGCGUUUGAAUUCUGGAAC	dps-miR-927-3p	656	297	1120	1611	205.216	122.523	302.206	384.347	TRUE	0.0026564	0.022255
novel_37	UGGUAACUCCACACCACCGUUGGC	api-miR-2765	535	257	652	566	167.364	106.021	175.927	135.035	FALSE	0.83804	0.86776
novel_4	CCAGAUCUAACUCUUCCAGCUCU	cte-miR-750	44694	43227	50158	47034	13981.6	17832.6	13534	11221.2	FALSE	0.018318	0.086272
novel_40	AAGAGAGCUAUCCUUCGACAGU	dme-miR-281-2-5p	260	181	266	323	81.3356	74.6688	71.7739	77.0604	FALSE	0.10535	0.29155
novel_42	UGGUAACUCCACCACCGUUGGC	bmo-miR-2765	128	77	278	294	40.0421	31.7652	75.0119	70.1416	TRUE	0.00027205	0.003972
novel_43	AUUGUACUUCAUCAGGUGCUCUGG	aae-miR-305-5p	3	3	5	12	0.938487	1.2376	1.34913	2.86292	NA	0.47202	NA
novel_44	CUAAGUAGUAGCGCCGAAGGUGA	api-miR-252b	433	291	560	635	135.455	120.048	151.103	151.496	FALSE	0.97788	0.99147
novel_46	UUUGGUAAAAGAUAGCCGGUAG	*	356	121	587	686	111.367	49.9167	158.388	163.664	FALSE	0.026745	0.11485
novel_5	UAUCACAGCCACUUUGAUGAACU	tca-miR-13a-3p	26422	20642	24810	27148	8265.57	8515.54	6694.4	6476.89	TRUE	0.00043881	0.0058242
novel_51	AGCUGCUGGACACUGCACAAGA	lmi-miR-210-5p	167	93	235	234	52.2425	38.3657	63.4093	55.827	FALSE	0.50495	0.76469
novel_52	UUUUUAACAGAAUCUGACCGUU	hsa-miR-553	246	206	358	372	76.9559	84.9822	96.598	88.7506	FALSE	0.78233	0.86226
novel_55	CUAAGUACUCCGUGCCGCAGGA	dpu-miR-252a	304	203	348	351	95.1	83.7446	93.8997	83.7405	FALSE	0.15008	0.35922
novel_57	UCCGUCCAACUCUUUUCCGCCU	ame-miR-3049-3p	65	35	122	93	20.3339	14.4387	32.9189	22.1877	FALSE	0.2316	0.47624
novel_58	UAAGGAACUGUUGUUCCGAUGG	gga-miR-2131-3p	171	82	204	164	53.4938	33.8279	55.0447	39.1266	FALSE	0.65353	0.81813
novel_61	AUUACACUGAUAAAAUGAUA	cbn-miR-64g	9	8	7	2	2.81546	3.30028	1.88879	0.477154	FALSE	0.077041	0.23433
novel_71	UAGAGAUCUACGAGACGGAU	*	28	21	31	36	8.75921	8.66323	8.36463	8.58877	FALSE	0.49417	0.76469
novel_79	AAAGGCACUCACAUCUUCAUUC	prd-miR-1175-3p	36	27	53	64	11.2618	11.1384	14.3008	15.2689	FALSE	0.65644	0.81813
novel_80	UUAGAUAAAUUCUGCUCAAU	*	35	15	61	42	10.949	6.18802	16.4594	10.0202	FALSE	0.42568	0.72833
novel_89	UGAGAGCUCCACUUUAAUCGUC	osa-miR812p	21	8	20	29	6.56941	3.30028	5.39654	6.91873	FALSE	0.89656	0.91537
novel_9	UCUUUGGUUACCUAGCUGUAUG	xtr-miR-9b-5p	8119	5398	8876	9368	2539.86	2226.86	2394.98	2234.99	FALSE	0.016986	0.082666
novel_90	UCCGUGUUUGAGAACUUCCUGU	ppc-miR-76-3p	9	8	27	26	2.81546	3.30028	7.28532	6.203	FALSE	0.11407	0.29155
novel_91	CAAGCCUCUUUGAUUCUGUGU	ebv-miR-BART10-5p	17	12	14	11	5.31809	4.95042	3.77758	2.62435	FALSE	0.11031	0.29155
novel_95	CCUUCACUGUGUGGCAUUAUUCG	mdv1-miR-M1-5p	4	2	4	5	1.25132	0.82507	1.07931	1.19288	NA	0.91142	NA
potential miRNA, miRNA sequences of B. tabaci were similar to those in other species but differed in some nucleotide positions.
* indicate miRNAs candidates were not found in other species in miRbase Version 20.0.
