# Supplementary material for: Genome-Wide Profiling of Cardinium-Responsive MicroRNAs in the Exotic Whitefly, Bemisia tabaci (Gennadius) Biotype Q
Source: Front Physiol. 2018 Nov 12;9:1580. doi: 10.3389/fphys.2018.01580 (PMC6241202; doi:10.3389/fphys.2018.01580)
Supplement: Supplementary file 4 [file Table_4.XLSX]

## Sheet: Sheet1
Table S4 GO terms for target genes of significant differentially expressed miRNAs
GO_accession	Description	Term_type	Over_represented_pValue	Corrected_pValue	DEG_item	DEG_list	Bg_item	Bg_list	Gene_names
GO:0006012	galactose metabolic process	biological_process	2.7148e-09	1.2252e-05	41	8211	42	14362	BTA027966.1,BTA027716.1,BTA011625.1,BTA002040.1,BTA001611.1,BTA021787.1,BTA012770.1,BTA011374.1,BTA003918.1,BTA002395.1,BTA018619.1,BTA002010.1,BTA008463.1,BTA021754.1,BTA010166.1,BTA023705.1,BTA024433.1,BTA005964.1,BTA006480.1,BTA004403.2,BTA013890.1,BTA003927.1,BTA005161.1,BTA022389.1,BTA019173.1,BTA021044.1,BTA002135.2,BTA012395.1,BTA023731.1,BTA028836.1,BTA021555.1,BTA017903.1,BTA016806.1,BTA…
GO:0005515	protein binding	molecular_function	5.4689e-07	0.0012341	2017	8211	3315	14362	BTA024286.1,BTA005964.1,BTA000871.3,BTA010826.1,BTA009994.1,BTA023986.1,BTA028496.2,BTA009926.1,BTA023131.1,BTA004687.1,BTA019714.1,BTA017747.1,BTA007899.1,BTA006766.1,BTA000203.1,BTA000100.1,BTA021861.1,BTA019066.1,BTA026727.1,BTA019191.1,BTA008319.1,BTA011934.1,BTA001148.1,BTA024871.1,BTA001009.1,BTA004523.1,BTA011719.1,BTA012129.1,BTA028424.1,BTA025608.1,BTA002938.1,BTA027398.1,BTA010749.1,BTA…
GO:0004565	beta-galactosidase activity	molecular_function	3.1154e-06	0.0045887	44	8211	50	14362	BTA028949.1,BTA027716.1,BTA011625.1,BTA026433.1,BTA002040.1,BTA001611.1,BTA011374.1,BTA021787.1,BTA012770.1,BTA003918.1,BTA002395.1,BTA018619.1,BTA008463.1,BTA002010.1,BTA021754.1,BTA023705.1,BTA010166.1,BTA024433.1,BTA027840.1,BTA005964.1,BTA004403.2,BTA028245.1,BTA006480.1,BTA003927.1,BTA013890.1,BTA027227.1;support_id=CUFF112.103.2,BTA019173.1,BTA005161.1,BTA022389.1,BTA012395.1,BTA002135.2,BT…
GO:0043168	anion binding	molecular_function	4.0671e-06	0.0045887	1208	8211	1952	14362	BTA002377.1,BTA024058.1,BTA014315.1,BTA001092.2,BTA007372.1,BTA000072.1,BTA008417.1,BTA018511.1,BTA009753.1,BTA001159.1,BTA003172.1,BTA018447.1,BTA004872.1,BTA016288.1,BTA027511.1,BTA003884.1,BTA013454.1,BTA002804.1,BTA027928.1,BTA023220.1,BTA019157.1,BTA029891.1,BTA023013.1,BTA002491.1,BTA023890.1,BTA021016.1,BTA020444.1,BTA026141.1,BTA029875.1,BTA022968.1,BTA019151.1,BTA004866.1,BTA022663.1,BTA…
GO:0005524	ATP binding	molecular_function	1.4684e-05	0.010253	859	8211	1372	14362	BTA022261.1,BTA022572.1,BTA016162.1,BTA009143.1,BTA017576.1,BTA023715.1,BTA000282.1,BTA027541.1,BTA010520.1,BTA007225.2,BTA028216.1,BTA002063.1,BTA002843.1,BTA020210.2,BTA025485.1,BTA013292.1,BTA018027.1,BTA011104.1,BTA025999.1,BTA000336.1;support_id=CUFF2.470.1,BTA005515.1,BTA002419.1,BTA009181.1,BTA029565.1,BTA007524.1,BTA006186.2,BTA010971.1,BTA012659.1,BTA018419.1,BTA005545.1,BTA013507.1,BTA0…
GO:0032559	adenyl ribonucleotide binding	molecular_function	1.4684e-05	0.010253	859	8211	1372	14362	BTA006290.1,BTA028526.1,BTA007514.1,BTA007197.1,BTA001251.1;support_id=CUFF4.720.1,BTA029882.1,BTA012720.1,BTA029530.1,BTA021666.1,BTA009783.2;support_id=CUFF42.60.1,BTA002668.1,BTA024248.1;support_id=CUFF99.271.2,BTA023890.1,BTA006189.1,BTA021016.1,BTA020444.1,BTA026141.1,BTA001700.1,BTA018370.1,BTA019151.1,BTA004866.1,BTA027788.1,BTA007904.1,BTA023327.1,BTA022663.1,BTA016288.1,BTA027511.1,BTA01…
GO:0030554	adenyl nucleotide binding	molecular_function	1.6872e-05	0.010253	865	8211	1383	14362	BTA029043.1,BTA004937.1,BTA010049.1,BTA001935.1,BTA005115.1,BTA014152.1;support_id=CUFF59.200.1,BTA015484.1,BTA007523.2,BTA026765.2,BTA007605.1,BTA020154.1,BTA025043.1,BTA028703.1,BTA005077.1,BTA015463.1,BTA027766.1,BTA007646.1,BTA015301.1,BTA008212.1,BTA029901.1,BTA000747.1,BTA003223.3,BTA022037.1,BTA029424.1,BTA008028.1,BTA022538.1,BTA025542.1,BTA011788.1,BTA029176.1,BTA000207.1,BTA001332.1,BTA…
GO:0000166	nucleotide binding	molecular_function	2.0645e-05	0.010253	1199	8211	1948	14362	BTA029530.1,BTA023413.1,BTA001251.1;support_id=CUFF4.720.1,BTA007514.1,BTA007197.1,BTA002989.1,BTA028526.1,BTA006290.1,BTA007904.1,BTA022663.1,BTA004866.1,BTA019151.1,BTA018506.1,BTA029875.1,BTA026141.1,BTA020444.1,BTA021016.1,BTA023890.1,BTA002491.1,BTA023013.1,BTA029891.1,BTA019157.1,BTA023220.1,BTA002804.1,BTA013454.1,BTA003884.1,BTA027511.1,BTA016288.1,BTA004872.1,BTA022364.1,BTA018447.1,BTA0…
GO:1901265	nucleoside phosphate binding	molecular_function	2.0645e-05	0.010253	1199	8211	1948	14362	BTA003508.1,BTA015656.2,BTA020938.1,BTA002687.1,BTA007413.1,BTA020569.1,BTA011556.1,BTA028147.1,BTA018763.1,BTA014695.1,BTA001470.1,BTA000844.1,BTA003980.1,BTA026016.1;support_id=CUFF107.343.1,BTA027754.1,BTA003937.1,BTA026118.1,BTA007334.1,BTA009430.1,BTA013337.1,BTA008354.1,BTA006397.1,BTA009479.1,BTA009197.1;support_id=CUFF39.334.1,BTA025975.1,BTA007301.1,BTA014019.1,BTA027242.1,BTA021160.3,BT…
GO:0003674	molecular_function	molecular_function	2.272e-05	0.010253	7295	8211	12617	14362	BTA009086.1,BTA029060.1,BTA022129.2,BTA017254.1,BTA018337.1,BTA028623.1,BTA001282.1,BTA003239.3,BTA019761.1,BTA015862.1,BTA006056.1;support_id=CUFF26.288.2,BTA028943.1,BTA000414.1,BTA013336.2,BTA010198.1,BTA002613.1;support_id=CUFF11.466.1,BTA009883.1,BTA000993.1,BTA003973.1;support_id=CUFF18.271.1,BTA008838.1,BTA000971.1,BTA010603.1,BTA017995.3,BTA013262.2,BTA021762.1,BTA009293.1,BTA028606.1,BTA…
21030.1,BTA015339.1,BTA009213.1,BTA011875.1,BTA025991.1,BTA028309.1,BTA021948.1,BTA010255.1,BTA022233.1,BTA022943.1,BTA003509.1,BTA005913.2,BTA019441.1,BTA029816.1,BTA013352.1,BTA017803.1,BTA027298.1,BTA009862.1,BTA000067.1;support_id=CUFF1.157.1,BTA019443.1,BTA009360.1,BTA021694.1,BTA014933.1,BTA020632.1,BTA006745.1,BTA017262.1,BTA012779.1,BTA015182.1,BTA021155.3,BTA005147.1,BTA003254.1,BTA01445…
1,BTA022326.1,BTA028588.1,BTA006292.1,BTA027625.1,BTA010885.1,BTA026646.1,BTA018568.2,BTA002976.1,BTA019489.1,BTA004307.1,BTA006756.1,BTA026833.1,BTA003478.1,BTA001766.1,BTA025147.1,BTA027373.1,BTA020463.1,BTA020700.1,BTA021398.1,BTA011184.1,BTA020043.1,BTA028008.1,BTA006925.1,BTA022816.1,BTA016574.1,BTA015883.1,BTA029091.1,BTA022306.1,BTA010383.1,BTA022429.1,BTA002609.1,BTA020878.1,BTA024289.1,B…
GO:0097367	carbohydrate derivative binding	molecular_function	2.81e-05	0.011529	1020	8211	1648	14362	BTA022315.1,BTA007891.1,BTA001450.1,BTA029178.1,BTA001687.1,BTA000293.1,BTA025059.1,BTA012989.1,BTA001192.1,BTA023814.1,BTA000419.1,BTA024407.3,BTA002216.1,BTA005804.1,BTA016193.1,BTA021556.1,BTA004938.1,BTA013015.1,BTA012566.1,BTA025360.1,BTA014344.1,BTA006162.1,BTA000067.1,BTA003850.1,BTA019917.1,BTA025058.1,BTA025566.1,BTA012855.1,BTA026113.1,BTA007677.1,BTA002921.1,BTA027545.1,BTA020008.2,BTA…
GO:0015925	galactosidase activity	molecular_function	3.2178e-05	0.012101	51	8211	62	14362	BTA003927.1,BTA027227.1;support_id=CUFF112.103.2,BTA013890.1,BTA005964.1,BTA027840.1,BTA004403.2,BTA028245.1,BTA006480.1,BTA009486.1;support_id=CUFF41.32.1,BTA024433.1,BTA010166.1,BTA023705.1,BTA010740.1,BTA016846.1,BTA028522.1,BTA017303.1,BTA000820.1,BTA023112.1,BTA029754.1;support_id=CUFF121.964.1,BTA016396.1,BTA028836.1,BTA023731.1,BTA017903.1,BTA016806.1,BTA021555.1,BTA019173.1,BTA005161.1,BT…
GO:0005230	extracellular ligand-gated ion channel activity	molecular_function	5.9113e-05	0.017984	169	8211	243	14362	BTA029510.1,BTA013787.1,BTA007618.1,BTA020190.1;support_id=CUFF84.148.2,BTA012628.1,BTA027657.1,BTA001160.1,BTA020183.1,BTA027466.1,BTA011361.1,BTA026274.1,BTA003789.1,BTA023869.1,BTA002153.1,BTA013653.1,BTA019363.1,BTA021562.2,BTA008432.1,BTA004639.1,BTA024055.1,BTA026266.1,BTA026272.1,BTA026268.1,BTA013861.1,BTA016354.1,BTA024681.3,BTA010684.1,BTA012779.1,BTA009240.1,BTA013283.1,BTA022665.2,BTA…
GO:0001882	nucleoside binding	molecular_function	7.6606e-05	0.017984	963	8211	1559	14362	BTA004354.1,BTA022020.1,BTA024051.1,BTA000112.1,BTA024399.1,BTA001586.1,BTA013806.2,BTA010076.1,BTA009486.1,BTA002104.2,BTA007225.2;support_id=CUFF30.588.2,BTA026985.1,BTA018000.1,BTA002926.1,BTA018889.1,BTA027545.1,BTA003568.1,BTA022316.1,BTA025860.1,BTA012096.1,BTA013487.1,BTA007733.1,BTA022279.1,BTA021970.1,BTA005498.1,BTA003850.1,BTA000067.1,BTA007677.1,BTA026113.1,BTA012855.1,BTA025566.1,BTA…
GO:0032555	purine ribonucleotide binding	molecular_function	7.6876e-05	0.017984	963	8211	1559	14362	BTA009608.1,BTA028310.1,BTA029091.1,BTA015382.1,BTA022262.1,BTA021816.1,BTA013968.1,BTA002064.1,BTA023727.1,BTA022312.1,BTA012406.1,BTA024801.1;support_id=CUFF102.342.2,BTA016043.1,BTA011638.1,BTA029419.1,BTA027385.1,BTA029352.1,BTA026770.1,BTA019506.1,BTA001169.1,BTA029099.1,BTA001616.1,BTA027499.1,BTA002108.1,BTA001701.1,BTA001691.1,BTA022388.1,BTA021071.1,BTA005000.1;support_id=CUFF22.5.1,BTA0…
GO:0001883	purine nucleoside binding	molecular_function	8.0565e-05	0.017984	961	8211	1556	14362	BTA015529.1,BTA015323.1,BTA027178.1,BTA003128.1,BTA002901.1,BTA010489.1,BTA019206.1,BTA004263.1,BTA020642.1,BTA019235.1,BTA006686.1,BTA024318.1,BTA009296.1,BTA019844.1,BTA019747.1,BTA005343.1,BTA027694.1,BTA014527.1,BTA018490.1,BTA028834.1,BTA023300.1,BTA023056.1,BTA002662.1,BTA001328.1,BTA013197.1,BTA005362.1,BTA000392.1,BTA024565.1,BTA020438.1,BTA021111.1,BTA029952.1,BTA001241.1,BTA014327.2,BTA…
GO:0032549	ribonucleoside binding	molecular_function	8.0565e-05	0.017984	961	8211	1556	14362	BTA027541.1,BTA010520.1,BTA000282.1,BTA023715.1,BTA021498.2,BTA028216.1,BTA007225.2,BTA002063.1,BTA020210.2,BTA027109.2,BTA002843.1,BTA025485.1,BTA022572.1,BTA022261.1,BTA016162.1,BTA009143.1,BTA017576.1,BTA029565.1,BTA007524.1,BTA024996.1,BTA006319.2,BTA009181.1,BTA006186.2,BTA010971.1,BTA005545.1,BTA018419.1,BTA013507.1,BTA012659.1,BTA006609.1;support_id=CUFF28.362.2,BTA025472.1,BTA018027.1,BTA…
GO:0032550	purine ribonucleoside binding	molecular_function	8.0565e-05	0.017984	961	8211	1556	14362	BTA007190.1,BTA028510.1,BTA007672.1,BTA020358.1,BTA022722.1,BTA004877.1,BTA000649.1,BTA024032.1,BTA000094.1,BTA027936.1,BTA000407.1,BTA002313.1,BTA012496.1,BTA022907.1,BTA009114.1,BTA009093.1;support_id=CUFF39.71.1,BTA027343.1,BTA002151.1,BTA017523.1,BTA003171.1,BTA022363.1,BTA024627.1,BTA024901.1,BTA027948.1,BTA001385.1,BTA016946.1,BTA015763.1,BTA025611.2,BTA019161.2,BTA013278.1,BTA008424.1,BTA0…
GO:0035639	purine ribonucleoside triphosphate binding	molecular_function	8.0565e-05	0.017984	961	8211	1556	14362	BTA027109.2,BTA020210.2,BTA002843.1,BTA025485.1,BTA010520.1,BTA027541.1,BTA000282.1,BTA023715.1,BTA028216.1,BTA021498.2,BTA002063.1,BTA007225.2,BTA009143.1,BTA017576.1,BTA022572.1,BTA022261.1,BTA016162.1,BTA013507.1,BTA018419.1,BTA005545.1,BTA012659.1,BTA006609.1;support_id=CUFF28.362.2,BTA025472.1,BTA029565.1,BTA007524.1,BTA024996.1,BTA009181.1,BTA006319.2,BTA010971.1,BTA006186.2,BTA025999.1,BTA…
GO:0036094	small molecule binding	molecular_function	8.4558e-05	0.017984	1230	8211	2012	14362	BTA006771.1,BTA021039.1;support_id=CUFF87.585.1,BTA002869.1,BTA021590.1,BTA000813.1,BTA013786.1,BTA010389.1,BTA025334.1,BTA016251.1,BTA024929.1,BTA003933.1,BTA019496.1,BTA028156.1,BTA000523.1,BTA010368.1,BTA013713.1,BTA017254.1,BTA023662.1,BTA029060.1,BTA007016.1,BTA022310.1,BTA007848.1,BTA016230.1,BTA030179.1,BTA001489.1,BTA019013.1,BTA015862.1,BTA018337.1,BTA012657.1,BTA023697.1,BTA005557.1,BTA…
GO:0017076	purine nucleotide binding	molecular_function	8.5968e-05	0.017984	969	8211	1570	14362	BTA004234.1,BTA019460.1,BTA027826.1,BTA025703.1,BTA016278.1,BTA003357.1,BTA022352.1,BTA029163.1,BTA004404.1;support_id=CUFF19.741.1,BTA004857.1,BTA010280.1,BTA015482.1,BTA019304.1,BTA029919.1,BTA014648.1,BTA020431.1,BTA004838.1,BTA017578.1,BTA005591.1,BTA020212.1,BTA006594.1,BTA002917.1,BTA025850.1,BTA012177.1,BTA028973.1,BTA012266.1,BTA022510.1,BTA029146.1,BTA020599.1,BTA011558.1,BTA013519.2,BTA…
GO:0032553	ribonucleotide binding	molecular_function	8.7671e-05	0.017984	976	8211	1582	14362	BTA009095.1,BTA009046.1,BTA009934.2,BTA017967.1,BTA021071.1,BTA022388.1,BTA005000.1;support_id=CUFF22.5.1,BTA002301.1,BTA016777.1,BTA002105.1,BTA001691.1,BTA029099.1,BTA001616.1,BTA027499.1,BTA002108.1,BTA001701.1,BTA029419.1,BTA027385.1,BTA029352.1,BTA026770.1,BTA019506.1,BTA001169.1,BTA012406.1,BTA022312.1,BTA016043.1,BTA024801.1;support_id=CUFF102.342.2,BTA011638.1,BTA013968.1,BTA002064.1,BTA0…
GO:0019318	hexose metabolic process	biological_process	0.00013159	0.025821	58	8211	74	14362	BTA024433.1,BTA010166.1,BTA023705.1,BTA025600.1,BTA003927.1,BTA003657.1,BTA013890.1,BTA029748.1,BTA003034.1,BTA004403.2,BTA028750.1,BTA006480.1,BTA005964.1,BTA003667.1,BTA021555.1,BTA017903.1,BTA016806.1,BTA028836.1,BTA023731.1,BTA012395.1,BTA002135.2,BTA021044.1,BTA011219.1,BTA000518.1,BTA019173.1,BTA005161.1,BTA022389.1,BTA006865.1;support_id=CUFF29.338.1,BTA028522.1,BTA010740.1,BTA016989.1;sup…
GO:0006508	proteolysis	biological_process	0.0001995	0.037515	476	8211	750	14362	BTA016814.1,BTA000687.1,BTA014846.1,BTA009738.1;support_id=CUFF41.669.1,BTA000640.1,BTA009208.1,BTA024708.1,BTA027547.1,BTA010956.1,BTA026401.1,BTA016024.1,BTA024584.1,BTA004621.1,BTA009795.1,BTA013907.1;support_id=CUFF58.177.1,BTA009124.3,BTA023006.1,BTA005568.1,BTA003664.1,BTA017132.1,BTA016982.1,BTA002673.1;support_id=CUFF11.600.1,BTA006611.1,BTA016012.1,BTA028518.1,BTA015945.1,BTA029684.1,BTA…
GO:0005996	monosaccharide metabolic process	biological_process	0.0002613	0.045405	60	8211	78	14362	BTA023731.1,BTA028836.1,BTA021555.1,BTA003667.1,BTA017903.1,BTA016806.1,BTA005161.1,BTA022389.1,BTA019173.1,BTA011219.1,BTA021044.1,BTA000518.1,BTA002135.2,BTA012395.1,BTA016989.1;support_id=CUFF73.89.1,BTA010740.1,BTA028522.1,BTA006865.1;support_id=CUFF29.338.1,BTA023112.1,BTA000820.1,BTA017303.1,BTA016396.1,BTA024433.1,BTA025600.1,BTA010166.1,BTA023705.1,BTA003034.1,BTA029748.1,BTA013890.1,BTA0…
GO:0004970	ionotropic glutamate receptor activity	molecular_function	0.00027164	0.045405	148	8211	214	14362	BTA009113.1,BTA023654.1,BTA013790.1,BTA006910.1,BTA022397.1,BTA013789.1,BTA000103.1,BTA024407.3,BTA020122.1,BTA018846.1,BTA009092.2,BTA015457.1,BTA003679.1,BTA001978.1,BTA020733.1,BTA015018.1,BTA009899.1,BTA026255.1,BTA005098.1,BTA024405.1,BTA009264.1,BTA009106.1,BTA026696.1,BTA007987.1,BTA009627.1,BTA016365.1,BTA008214.1,BTA025518.1,BTA005033.1,BTA023620.1,BTA006505.1,BTA018074.1,BTA023721.1,BTA…
GO:0008066	glutamate receptor activity	molecular_function	0.00027164	0.045405	148	8211	214	14362	BTA009106.1,BTA026696.1,BTA009264.1,BTA009627.1,BTA007987.1,BTA016365.1,BTA008214.1,BTA025518.1,BTA005033.1,BTA006505.1,BTA023620.1,BTA008679.1,BTA025982.3,BTA018074.1,BTA023721.1,BTA016701.1,BTA021391.1,BTA009075.1,BTA026254.1,BTA016351.1,BTA020764.1,BTA009113.1,BTA023654.1,BTA013790.1,BTA015457.1,BTA006910.1,BTA022397.1,BTA013789.1,BTA000103.1,BTA020122.1,BTA024407.3,BTA018846.1,BTA009092.2,BTA…
GO:0003824	catalytic activity	molecular_function	0.00031005	0.049973	4000	8211	6813	14362	BTA028755.1,BTA002313.1,BTA014790.1,BTA029430.1,BTA021071.1;support_id=CUFF87.681.1,BTA004936.1,BTA013158.1,BTA027948.1,BTA029996.1;support_id=CUFF123.242.1,BTA022684.1,BTA016946.1,BTA003672.1,BTA007019.1,BTA005973.1,BTA021340.1,BTA015442.1,BTA020793.1,BTA000006.1,BTA028510.1,BTA028967.3,BTA006154.1,BTA020073.1,BTA011174.1,BTA016817.1,BTA004780.1;support_id=CUFF21.451.1,BTA010512.1,BTA014058.1,BT…
1,BTA001758.2,BTA009122.1,BTA021906.3,BTA001518.1,BTA008317.1,BTA016967.1,BTA007207.1,BTA018744.1,BTA022731.1,BTA000336.1;support_id=CUFF2.470.1,BTA002419.1,BTA025999.1,BTA006170.1,BTA028184.1,BTA019742.1,BTA027262.1,BTA028736.2,BTA006162.1,BTA023455.1,BTA009015.1,BTA007677.1,BTA023779.1,BTA004605.1,BTA020967.1,BTA026174.1,BTA025058.1,BTA023112.1,BTA012989.1,BTA027041.1,BTA000306.1,BTA017933.1,BT…
GO:0009719	response to endogenous stimulus	biological_process	0.00032795	0.051036	46	8211	58	14362	BTA017724.1,BTA005893.1,BTA006056.1;support_id=CUFF26.288.2,BTA006478.2,BTA003432.1,BTA005964.1,BTA029602.1,BTA017116.1,BTA001819.1,BTA009023.1;support_id=CUFF38.344.2,BTA014618.1,BTA011156.1,BTA017741.1,BTA000849.1,BTA026677.3;support_id=CUFF109.340.1,BTA007440.1,BTA026280.1,BTA026299.1,BTA023731.1,BTA028775.1,BTA012783.1,BTA001149.1,BTA010850.1,BTA004683.1,BTA012979.1,BTA029603.1,BTA002944.1,BT…
GO:0004888	transmembrane signaling receptor activity	molecular_function	0.00043849	0.065964	282	8211	433	14362	BTA010204.1,BTA005650.1;support_id=CUFF24.628.1,BTA017818.1,BTA024058.1,BTA021875.1,BTA021564.1,BTA000445.1,BTA021471.1;support_id=CUFF89.562.1,BTA009207.1,BTA000214.1,BTA009143.1;support_id=CUFF39.179.2,BTA028178.1,BTA028990.1,BTA012756.1,BTA026530.1,BTA003628.1,BTA002364.1,BTA020444.1,BTA008484.1,BTA010553.1,BTA002491.1,BTA019602.1,BTA026256.1,BTA002222.1,BTA019151.1,BTA024494.1,BTA010555.1,BTA…
GO:0004553	hydrolase activity, hydrolyzing O-glycosyl compounds	molecular_function	0.00048099	0.070024	168	8211	248	14362	BTA016389.1,BTA017262.1,BTA024433.1,BTA006480.1,BTA003034.1,BTA013890.1,BTA027813.1,BTA020889.1,BTA000570.1,BTA018967.1;support_id=CUFF78.414.2,BTA002135.2,BTA021044.1,BTA023063.2,BTA006152.1,BTA022178.1,BTA029807.2,BTA027920.1,BTA008946.1,BTA018955.2,BTA020852.2,BTA012794.1,BTA027818.1,BTA011625.1,BTA022194.1,BTA014730.1,BTA024965.1,BTA002040.1,BTA025946.1,BTA000534.1,BTA013347.1,BTA021787.1,BTA…
GO:0071495	cellular response to endogenous stimulus	biological_process	0.00051283	0.072325	38	8211	47	14362	BTA012979.1,BTA004683.1,BTA010850.1,BTA001149.1,BTA012783.1,BTA023731.1,BTA028775.1,BTA007440.1,BTA026280.1,BTA000849.1,BTA026677.3;support_id=CUFF109.340.1,BTA017741.1,BTA011156.1,BTA014618.1,BTA009023.1;support_id=CUFF38.344.2,BTA017116.1,BTA029602.1,BTA005964.1,BTA003432.1,BTA006478.2,BTA005893.1,BTA017724.1,BTA019434.1,BTA002188.1,BTA018619.1,BTA024580.1,BTA023783.1,BTA002147.1;support_id=CUF…
GO:0016787	hydrolase activity	molecular_function	0.00081992	0.112	1805	8211	3019	14362	BTA022733.3,BTA002942.1,BTA028763.1,BTA011500.1,BTA005181.1,BTA028171.1,BTA026903.5,BTA012902.1,BTA020738.1,BTA020408.2,BTA003918.1,BTA019624.1,BTA017428.1,BTA006304.1,BTA027478.1,BTA009030.2,BTA009171.1,BTA006522.1,BTA019289.1,BTA014928.1;support_id=CUFF62.248.1,BTA006067.1;support_id=CUFF26.309.1,BTA027716.1,BTA005342.1,BTA011431.1,BTA002872.1,BTA024041.1,BTA004314.2,BTA028276.1,BTA020473.1,BTA…
GO:0071310	cellular response to organic substance	biological_process	0.0008438	0.112	41	8211	52	14362	BTA004683.1,BTA012979.1,BTA001149.1,BTA012783.1,BTA010850.1,BTA028775.1,BTA023731.1,BTA017741.1,BTA014618.1,BTA011156.1,BTA000849.1,BTA026677.3;support_id=CUFF109.340.1,BTA007440.1,BTA026280.1,BTA029602.1,BTA017116.1,BTA009023.1;support_id=CUFF38.344.2,BTA006478.2,BTA003432.1,BTA005964.1,BTA017724.1,BTA005893.1,BTA002188.1,BTA019434.1,BTA024580.1,BTA028975.1,BTA018619.1,BTA029455.2,BTA011364.1,BT…
GO:0010033	response to organic substance	biological_process	0.00096677	0.12466	51	8211	67	14362	BTA006056.1;support_id=CUFF26.288.2,BTA014210.1,BTA017724.1,BTA005893.1,BTA029602.1,BTA017116.1,BTA001819.1,BTA009023.1;support_id=CUFF38.344.2,BTA006478.2,BTA003432.1,BTA005964.1,BTA026299.1,BTA028775.1,BTA023731.1,BTA017741.1,BTA014618.1,BTA011156.1,BTA026677.3;support_id=CUFF109.340.1,BTA021558.1,BTA000849.1,BTA026280.1,BTA007440.1,BTA004683.1,BTA012979.1,BTA012783.1,BTA001149.1,BTA010850.1,BT…
GO:0003724	RNA helicase activity	molecular_function	0.0010347	0.12971	81	8211	113	14362	BTA001385.1,BTA022312.1,BTA016230.1,BTA012406.1,BTA028069.1,BTA016043.1,BTA026113.1,BTA024053.1,BTA002151.1,BTA027934.1,BTA003623.1,BTA015382.1,BTA014512.1,BTA027771.1,BTA027936.1,BTA018546.1,BTA005252.1,BTA027434.1,BTA030015.1,BTA021182.1,BTA013015.1,BTA007169.2,BTA022315.1,BTA007577.1,BTA027847.1,BTA015065.1,BTA018414.1,BTA010076.1,BTA024075.1,BTA025953.1,BTA012267.1,BTA018316.1,BTA019084.1,BTA…
GO:0004386	helicase activity	molecular_function	0.0012481	0.15223	170	8211	255	14362	BTA002163.1,BTA010272.1,BTA008471.3,BTA025592.1,BTA014315.1,BTA006636.1,BTA022538.1,BTA007899.1,BTA018655.1,BTA015059.1,BTA016832.1,BTA010049.1,BTA014578.1,BTA023013.1,BTA015448.1,BTA029796.1,BTA020154.1,BTA023523.1,BTA029921.1,BTA004866.1,BTA029709.1,BTA029273.1,BTA002910.1,BTA000209.1,BTA001442.2,BTA017360.1,BTA018370.1,BTA016830.1,BTA026265.1,BTA015769.2;support_id=CUFF67.78.1,BTA001461.2,BTA0…
GO:0008716	D-alanine-D-alanine ligase activity	molecular_function	0.0013225	0.15315	12	8211	12	14362	BTA017244.1,BTA017578.1,BTA012654.1,BTA006661.1,BTA027853.1,BTA005145.1,BTA027238.1,BTA006898.1,BTA027163.1,BTA027754.1,BTA008028.1,BTA004857.1
GO:0019079	viral genome replication	biological_process	0.0013234	0.15315	52	8211	69	14362	BTA021182.1,BTA021556.1,BTA012566.1,BTA001331.1;support_id=CUFF5.63.2,BTA020154.1,BTA014527.1,BTA001940.1,BTA011326.1,BTA019629.1,BTA008794.1,BTA006348.1,BTA015059.1,BTA006636.1,BTA027770.1,BTA000359.1,BTA014327.2,BTA018130.1;support_id=CUFF76.210.4,BTA016043.1,BTA004716.1,BTA012406.1,BTA014512.1,BTA019459.1,BTA024170.1,BTA000782.2,BTA016221.1,BTA020148.1,BTA015341.1,BTA020043.1,BTA019624.1,BTA01…
GO:0014070	response to organic cyclic compound	biological_process	0.0013589	0.15332	33	8211	41	14362	BTA010850.1,BTA001149.1,BTA004683.1,BTA012979.1,BTA014618.1,BTA017741.1,BTA011156.1,BTA007440.1,BTA026280.1,BTA026677.3;support_id=CUFF109.340.1,BTA000849.1,BTA028775.1,BTA006478.2,BTA003432.1,BTA029602.1,BTA017116.1,BTA017724.1,BTA005893.1,BTA006056.1;support_id=CUFF26.288.2,BTA024580.1,BTA002188.1,BTA019434.1,BTA023783.1,BTA010276.1;support_id=CUFF43.403.2,BTA010658.1,BTA029603.1,BTA013704.1,BT…
GO:0005488	binding	molecular_function	0.0015573	0.17142	4802	8211	8240	14362	BTA010379.1,BTA010816.2,BTA015196.2,BTA003842.1;support_id=CUFF17.464.1,BTA020965.1,BTA027118.1,BTA018481.1,BTA018594.1,BTA020238.1,BTA012993.2,BTA012048.1,BTA001763.1,BTA018573.1,BTA006432.1,BTA003808.1,BTA020549.1,BTA004718.1,BTA018094.1,BTA023134.1,BTA006968.1,BTA005803.2,BTA007758.1,BTA020734.2,BTA028770.1,BTA005974.3,BTA021422.2,BTA017886.1,BTA028191.1,BTA007575.2,BTA004874.1,BTA000684.1,BTA…
1,BTA003786.1,BTA013116.1,BTA023433.1,BTA002627.1,BTA027891.1,BTA026590.1,BTA009877.1,BTA024706.1,BTA000743.1,BTA010391.1,BTA029560.2,BTA008026.1,BTA002846.1,BTA011073.2,BTA029120.1,BTA003411.1,BTA026466.1,BTA019375.1,BTA018361.1,BTA028613.1,BTA022528.1,BTA007376.1,BTA013864.1,BTA024325.1,BTA013000.1,BTA019173.1,BTA010503.2;support_id=CUFF44.257.2,BTA012072.1,BTA002689.1,BTA003162.1,BTA027605.1,B…
GO:0016887	ATPase activity	molecular_function	0.0017181	0.18102	287	8211	448	14362	BTA006047.1,BTA017043.1,BTA013292.1,BTA009528.1,BTA015810.1,BTA018419.1,BTA025472.1,BTA024732.1,BTA029565.1,BTA023387.1,BTA006364.1,BTA003232.1,BTA007974.3,BTA001288.1,BTA025880.1,BTA016162.1,BTA002843.1,BTA004618.1,BTA028063.1,BTA026879.1,BTA024292.2,BTA019206.1,BTA018397.1,BTA014288.1,BTA014527.1,BTA019844.1,BTA011326.1,BTA029173.1,BTA009536.1,BTA009554.1;support_id=CUFF41.186.1,BTA029751.1,BTA…
GO:0004197	cysteine-type endopeptidase activity	molecular_function	0.0017248	0.18102	84	8211	119	14362	BTA016815.1,BTA023808.1,BTA005900.1;support_id=CUFF25.408.1,BTA029147.1,BTA009484.1,BTA014847.1,BTA009877.1,BTA005136.1,BTA001253.1,BTA002840.2,BTA024606.1,BTA016674.1,BTA015121.1,BTA001909.1,BTA019154.1,BTA019609.1;support_id=CUFF81.261.1,BTA009797.1,BTA017219.1;support_id=CUFF73.689.1,BTA020569.1,BTA002734.1,BTA014571.1,BTA001091.1;support_id=CUFF4.227.1,BTA018717.1,BTA002311.1,BTA019354.1,BTA0…
GO:0016798	hydrolase activity, acting on glycosyl bonds	molecular_function	0.0018939	0.19425	181	8211	274	14362	BTA018151.1;support_id=CUFF76.255.1,BTA010740.1,BTA016396.1,BTA016806.1,BTA022030.1,BTA017903.1,BTA020266.2,BTA022177.1,BTA019173.1,BTA022389.1,BTA028273.1,BTA004403.2,BTA028245.1,BTA009752.1,BTA009393.1,BTA005526.1,BTA027840.1,BTA019076.1,BTA023705.1,BTA018121.1,BTA028309.1,BTA013163.1,BTA028458.1,BTA029780.2,BTA009555.1,BTA008463.1,BTA022209.1,BTA018290.1,BTA018619.1,BTA029871.1,BTA002483.1,BTA…
GO:0006749	glutathione metabolic process	biological_process	0.0025948	0.26023	17	8211	19	14362	BTA027944.1,BTA028311.1,BTA022973.1,BTA023405.1,BTA003768.1,BTA003769.1,BTA001108.1,BTA019858.1;support_id=CUFF83.17.1,BTA022077.1,BTA025701.1,BTA022543.1,BTA005271.1,BTA013757.1,BTA027649.1,BTA024000.1,BTA021550.1,BTA007023.1
GO:0009755	hormone-mediated signaling pathway	biological_process	0.0027201	0.26119	31	8211	39	14362	BTA004683.1,BTA002188.1,BTA012979.1,BTA019434.1,BTA024580.1,BTA010850.1,BTA012783.1,BTA001149.1,BTA028775.1,BTA014618.1,BTA017741.1,BTA011156.1,BTA007440.1,BTA026280.1,BTA023783.1,BTA026677.3;support_id=CUFF109.340.1,BTA000849.1,BTA029602.1,BTA009023.1;support_id=CUFF38.344.2,BTA017116.1,BTA010658.1,BTA006478.2,BTA003432.1,BTA010121.1,BTA000129.1,BTA004745.1,BTA004744.1,BTA017724.1,BTA029603.1,BT…
GO:0032870	cellular response to hormone stimulus	biological_process	0.0027201	0.26119	31	8211	39	14362	BTA029602.1,BTA009023.1;support_id=CUFF38.344.2,BTA017116.1,BTA010658.1,BTA006478.2,BTA003432.1,BTA010121.1,BTA000129.1,BTA004745.1,BTA004744.1,BTA029603.1,BTA017724.1,BTA013704.1,BTA005893.1,BTA004683.1,BTA002188.1,BTA019434.1,BTA012979.1,BTA024580.1,BTA010850.1,BTA012783.1,BTA001149.1,BTA028775.1,BTA017741.1,BTA011156.1,BTA014618.1,BTA026280.1,BTA023783.1,BTA007440.1,BTA000849.1,BTA026677.3;sup…
GO:0033179	proton-transporting V-type ATPase, V0 domain	cellular_component	0.0030514	0.2869	24	8211	29	14362	BTA024967.1,BTA012992.1,BTA010658.1,BTA008026.1,BTA004775.1,BTA019147.1,BTA014855.1,BTA004718.1,BTA004526.1,BTA012506.1,BTA018494.1,BTA009208.1,BTA007225.2,BTA012129.1,BTA002481.1,BTA025211.1,BTA021977.2,BTA012553.1,BTA013711.1,BTA005660.2,BTA018475.1,BTA004068.1;support_id=CUFF18.493.1,BTA015453.1,BTA007524.1
GO:0003678	DNA helicase activity	molecular_function	0.0035925	0.33088	110	8211	162	14362	BTA021398.1,BTA012357.1,BTA029565.1,BTA001470.1,BTA012396.1,BTA009034.1,BTA007197.1,BTA020338.1,BTA016178.1,BTA015810.1,BTA000207.1,BTA000539.1,BTA001332.1,BTA029713.1,BTA026025.1,BTA001461.2,BTA016830.1,BTA006047.1,BTA015769.2;support_id=CUFF67.78.1,BTA028089.1,BTA018370.1,BTA024292.2,BTA023866.1,BTA013280.1,BTA026879.1,BTA004618.1,BTA015656.2,BTA002843.1,BTA015759.1,BTA002910.1,BTA000209.1,BTA0…
GO:0008073	ornithine decarboxylase inhibitor activity	molecular_function	0.003848	0.34051	10	8211	10	14362	BTA018126.1,BTA010721.1,BTA022516.1,BTA002147.1;support_id=CUFF9.207.1,BTA011171.1,BTA022514.1,BTA026929.1,BTA022518.1,BTA010609.1,BTA019553.1
GO:0042979	ornithine decarboxylase regulator activity	molecular_function	0.003848	0.34051	10	8211	10	14362	BTA022514.1,BTA011171.1,BTA022516.1,BTA002147.1;support_id=CUFF9.207.1,BTA010721.1,BTA018126.1,BTA019553.1,BTA010609.1,BTA022518.1,BTA026929.1
GO:0038023	signaling receptor activity	molecular_function	0.0043039	0.36761	319	8211	506	14362	BTA021548.3,BTA002084.1,BTA005703.1,BTA026269.1,BTA028371.1,BTA002117.1,BTA021404.1,BTA012943.1,BTA016432.1,BTA022220.1,BTA014694.1,BTA011986.1,BTA006057.1,BTA017060.1,BTA007617.1,BTA002161.1,BTA004014.1,BTA004901.1,BTA010276.1;support_id=CUFF43.403.2,BTA020719.1;support_id=CUFF86.420.1,BTA013542.1,BTA011184.1,BTA005937.1,BTA015456.1,BTA022072.1,BTA024333.3,BTA007715.1,BTA013709.1,BTA013064.1,BTA…
GO:0004252	serine-type endopeptidase activity	molecular_function	0.0044371	0.36761	117	8211	174	14362	BTA021471.1;support_id=CUFF89.562.1,BTA015352.3,BTA002398.1,BTA003257.1,BTA029334.1,BTA029580.1;support_id=CUFF121.411.1,BTA002626.1,BTA023433.1,BTA019083.1,BTA024457.1,BTA013761.1,BTA014095.1,BTA024058.1,BTA006019.1,BTA011271.1,BTA022679.1,BTA006288.1,BTA006015.1,BTA019157.1,BTA000979.1,BTA028566.1,BTA006156.1,BTA010712.1,BTA001613.1,BTA000214.1,BTA022223.1,BTA028591.1;support_id=CUFF117.313.1,B…
GO:0004872	receptor activity	molecular_function	0.0048418	0.36761	384	8211	615	14362	BTA013064.1,BTA013709.1,BTA007715.1,BTA009558.1,BTA018754.1,BTA018359.1,BTA021817.2,BTA015456.1,BTA022072.1,BTA005937.1,BTA018786.1,BTA024333.3,BTA020719.1;support_id=CUFF86.420.1,BTA010276.1;support_id=CUFF43.403.2,BTA011184.1,BTA013542.1,BTA006129.1,BTA017060.1,BTA006057.1,BTA011986.1,BTA004014.1,BTA004901.1,BTA002161.1,BTA016674.1,BTA007617.1,BTA022220.1,BTA016432.1,BTA014694.1,BTA006158.1,BTA…
GO:0008236	serine-type peptidase activity	molecular_function	0.0048585	0.36761	182	8211	280	14362	BTA019764.1,BTA005475.1,BTA013897.1,BTA003886.2;support_id=CUFF17.585.1,BTA019708.1,BTA007225.2;support_id=CUFF30.588.2,BTA019635.1,BTA024452.1,BTA019424.1,BTA012329.1,BTA003932.1,BTA014964.1,BTA009627.1,BTA012900.1,BTA007015.2,BTA015516.1,BTA009472.1,BTA015349.1,BTA023020.1,BTA013899.1,BTA028763.1,BTA026828.1,BTA004561.1,BTA020738.1,BTA012902.1,BTA008866.1,BTA000523.1,BTA006304.1,BTA020475.1,BTA…
GO:0017171	serine hydrolase activity	molecular_function	0.0048585	0.36761	182	8211	280	14362	BTA029525.1,BTA023006.1,BTA003664.1,BTA029684.1,BTA015107.1,BTA003552.1,BTA026640.1,BTA017930.1;support_id=CUFF75.851.2,BTA009097.1,BTA010352.1,BTA028187.1,BTA027771.1,BTA000687.1,BTA018509.1,BTA023407.1,BTA014846.1,BTA000640.1,BTA010956.1,BTA016030.1,BTA027016.1,BTA024584.1,BTA026977.1;support_id=CUFF111.226.1,BTA026246.1,BTA005636.1,BTA011180.2,BTA025913.1,BTA000536.1,BTA020410.1,BTA005476.1,BT…
GO:0044419	interspecies interaction between organisms	biological_process	0.0049492	0.36761	223	8211	348	14362	BTA022400.2;support_id=CUFF93.91.1,BTA010255.1;support_id=CUFF43.340.1,BTA022967.1,BTA008371.1;support_id=CUFF35.358.1,BTA020425.1,BTA006047.1,BTA006422.1;support_id=CUFF27.347.1,BTA021063.3,BTA017784.1,BTA009528.1,BTA007264.1,BTA014100.2,BTA016815.1,BTA027640.1,BTA009307.1;support_id=CUFF39.693.1,BTA024441.1,BTA005545.1,BTA016959.2,BTA024055.1,BTA020082.1,BTA026114.1;support_id=CUFF107.558.1,BTA…
GO:0002949	tRNA threonylcarbamoyladenosine modification	biological_process	0.0053361	0.36761	49	8211	67	14362	BTA000209.1,BTA007974.3,BTA024051.1,BTA018316.1,BTA026019.1,BTA018676.1,BTA010576.3,BTA026695.3,BTA018820.1,BTA024292.2,BTA018370.1,BTA018414.1,BTA023866.1,BTA003668.1,BTA007577.1,BTA015656.2,BTA000207.1,BTA009528.1,BTA001332.1,BTA000038.1,BTA016830.1,BTA001194.1,BTA000628.1,BTA007197.1,BTA024732.1,BTA000523.1,BTA019624.1,BTA023828.1,BTA021970.1,BTA014512.1,BTA027934.1,BTA019459.1,BTA016243.1,BTA…
GO:0070525	tRNA threonylcarbamoyladenosine metabolic process	biological_process	0.0053361	0.36761	49	8211	67	14362	BTA004838.1,BTA016832.1,BTA019304.1,BTA012566.1,BTA009536.1,BTA011326.1,BTA027936.1,BTA001192.1,BTA014512.1,BTA027934.1,BTA019459.1,BTA016243.1,BTA024053.1,BTA026113.1,BTA024801.1;support_id=CUFF102.342.2,BTA016043.1,BTA012406.1,BTA016230.1,BTA014327.2,BTA008004.1,BTA000207.1,BTA009528.1,BTA001332.1,BTA000038.1,BTA001194.1,BTA016830.1,BTA000628.1,BTA007197.1,BTA024732.1,BTA000523.1,BTA019624.1,BT…
GO:0003995	acyl-CoA dehydrogenase activity	molecular_function	0.0053614	0.36761	23	8211	28	14362	BTA017034.1,BTA004923.1,BTA003357.1,BTA006020.1,BTA000643.1,BTA026168.1,BTA028244.1,BTA003255.1,BTA028613.1,BTA023269.1,BTA016265.1,BTA027626.1,BTA027870.1,BTA021857.1,BTA006058.1,BTA027871.1,BTA020192.1,BTA018717.1,BTA028940.1,BTA018691.1,BTA000363.1,BTA017248.1,BTA008357.1
GO:0033993	response to lipid	biological_process	0.0053761	0.36761	29	8211	37	14362	BTA006478.2,BTA003432.1,BTA029602.1,BTA010658.1,BTA017116.1,BTA029603.1,BTA017724.1,BTA005893.1,BTA013704.1,BTA000129.1,BTA004745.1,BTA010121.1,BTA004744.1,BTA024580.1,BTA001149.1,BTA010850.1,BTA002188.1,BTA004683.1,BTA012979.1,BTA019434.1,BTA017741.1,BTA011156.1,BTA014618.1,BTA000849.1,BTA026677.3;support_id=CUFF109.340.1,BTA026280.1,BTA023783.1,BTA007440.1,BTA028775.1
GO:0043401	steroid hormone mediated signaling pathway	biological_process	0.0053761	0.36761	29	8211	37	14362	BTA024580.1,BTA001149.1,BTA010850.1,BTA002188.1,BTA004683.1,BTA019434.1,BTA012979.1,BTA011156.1,BTA017741.1,BTA014618.1,BTA026677.3;support_id=CUFF109.340.1,BTA000849.1,BTA023783.1,BTA026280.1,BTA007440.1,BTA028775.1,BTA006478.2,BTA003432.1,BTA029602.1,BTA010658.1,BTA017116.1,BTA029603.1,BTA017724.1,BTA005893.1,BTA013704.1,BTA000129.1,BTA004745.1,BTA010121.1,BTA004744.1
GO:0048545	response to steroid hormone	biological_process	0.0053761	0.36761	29	8211	37	14362	BTA024580.1,BTA010850.1,BTA001149.1,BTA004683.1,BTA002188.1,BTA012979.1,BTA019434.1,BTA014618.1,BTA017741.1,BTA011156.1,BTA026280.1,BTA023783.1,BTA007440.1,BTA026677.3;support_id=CUFF109.340.1,BTA000849.1,BTA028775.1,BTA006478.2,BTA003432.1,BTA029602.1,BTA017116.1,BTA010658.1,BTA017724.1,BTA029603.1,BTA013704.1,BTA005893.1,BTA010121.1,BTA000129.1,BTA004745.1,BTA004744.1
GO:0071383	cellular response to steroid hormone stimulus	biological_process	0.0053761	0.36761	29	8211	37	14362	BTA017741.1,BTA011156.1,BTA014618.1,BTA026677.3;support_id=CUFF109.340.1,BTA000849.1,BTA026280.1,BTA007440.1,BTA023783.1,BTA028775.1,BTA024580.1,BTA001149.1,BTA010850.1,BTA002188.1,BTA004683.1,BTA019434.1,BTA012979.1,BTA029603.1,BTA017724.1,BTA005893.1,BTA013704.1,BTA004745.1,BTA000129.1,BTA010121.1,BTA004744.1,BTA006478.2,BTA003432.1,BTA029602.1,BTA017116.1,BTA010658.1
GO:0071396	cellular response to lipid	biological_process	0.0053761	0.36761	29	8211	37	14362	BTA004745.1,BTA000129.1,BTA010121.1,BTA004744.1,BTA029603.1,BTA017724.1,BTA005893.1,BTA013704.1,BTA029602.1,BTA010658.1,BTA017116.1,BTA006478.2,BTA003432.1,BTA028775.1,BTA017741.1,BTA011156.1,BTA014618.1,BTA000849.1,BTA026677.3;support_id=CUFF109.340.1,BTA007440.1,BTA026280.1,BTA023783.1,BTA002188.1,BTA004683.1,BTA012979.1,BTA019434.1,BTA024580.1,BTA001149.1,BTA010850.1
GO:0071407	cellular response to organic cyclic compound	biological_process	0.0053761	0.36761	29	8211	37	14362	BTA028775.1,BTA017741.1,BTA014618.1,BTA011156.1,BTA026677.3;support_id=CUFF109.340.1,BTA000849.1,BTA026280.1,BTA007440.1,BTA023783.1,BTA002188.1,BTA004683.1,BTA019434.1,BTA012979.1,BTA024580.1,BTA001149.1,BTA010850.1,BTA004745.1,BTA000129.1,BTA010121.1,BTA004744.1,BTA029603.1,BTA017724.1,BTA005893.1,BTA013704.1,BTA029602.1,BTA017116.1,BTA010658.1,BTA006478.2,BTA003432.1
GO:0044403	symbiosis, encompassing mutualism through parasitism	biological_process	0.0056594	0.37614	222	8211	347	14362	BTA024129.1,BTA022093.1,BTA011036.1,BTA009532.1,BTA019074.1,BTA015339.1,BTA028458.1,BTA017197.1,BTA002929.1,BTA001945.1,BTA029181.1,BTA026579.1,BTA019770.2,BTA027841.1,BTA017997.1;support_id=CUFF76.3.1,BTA009533.1,BTA012160.1,BTA010485.1,BTA012499.1,BTA017507.1;support_id=CUFF74.627.2,BTA002114.1,BTA006571.1,BTA023203.2,BTA012267.1,BTA011170.1,BTA014155.1,BTA023871.1,BTA027409.1,BTA011383.1,BTA01…
GO:0009725	response to hormone	biological_process	0.0056864	0.37614	35	8211	46	14362	BTA010850.1,BTA012783.1,BTA001149.1,BTA004683.1,BTA012979.1,BTA011156.1,BTA017741.1,BTA014618.1,BTA007440.1,BTA026280.1,BTA000849.1,BTA026677.3;support_id=CUFF109.340.1,BTA026299.1,BTA028775.1,BTA006478.2,BTA003432.1,BTA029602.1,BTA009023.1;support_id=CUFF38.344.2,BTA001819.1,BTA017116.1,BTA017724.1,BTA005893.1,BTA024580.1,BTA002188.1,BTA019434.1,BTA023783.1,BTA002515.1,BTA010658.1,BTA029603.1,BT…
GO:0016310	phosphorylation	biological_process	0.0057509	0.37614	242	8211	380	14362	BTA001251.1;support_id=CUFF4.720.1,BTA028526.1,BTA012720.1,BTA011232.1,BTA026609.1,BTA013656.1,BTA020345.1,BTA029530.1,BTA006721.1,BTA022546.1,BTA002668.1,BTA024248.1;support_id=CUFF99.271.2,BTA020444.1,BTA007297.1,BTA019151.1,BTA000111.1,BTA002147.1;support_id=CUFF9.207.1,BTA024733.1,BTA016421.1,BTA019284.1,BTA010391.1,BTA028976.1,BTA012322.1,BTA017267.1,BTA009447.1,BTA022663.1,BTA019568.1,BTA02…
GO:0005231	excitatory extracellular ligand-gated ion channel activity	molecular_function	0.0059491	0.38354	25	8211	31	14362	BTA029145.1,BTA004639.1,BTA002153.1,BTA008214.1,BTA012756.1,BTA010276.1;support_id=CUFF43.403.2,BTA020122.1,BTA012755.1,BTA009143.1;support_id=CUFF39.179.2,BTA024087.1,BTA004901.1,BTA013790.1,BTA013861.1,BTA002161.1,BTA013833.1,BTA020190.1;support_id=CUFF84.148.2,BTA009899.1,BTA013787.1,BTA029510.1,BTA006056.1;support_id=CUFF26.288.2,BTA029327.1,BTA029020.1,BTA002491.1,BTA003830.1,BTA003829.1
GO:0019058	viral life cycle	biological_process	0.0064486	0.40989	121	8211	182	14362	BTA012603.1,BTA023354.1,BTA006364.1,BTA023383.1,BTA014602.1,BTA001442.2,BTA000767.2,BTA002843.1,BTA016638.1,BTA015759.1,BTA004745.1,BTA016604.1,BTA027818.1,BTA021174.1,BTA018955.2,BTA003776.1;support_id=CUFF17.298.2,BTA020209.1,BTA006047.1,BTA022967.1,BTA010255.1;support_id=CUFF43.340.1,BTA018535.1,BTA022400.2;support_id=CUFF93.91.1,BTA009783.2;support_id=CUFF42.60.1,BTA001332.1,BTA014100.2,BTA00…
GO:0008234	cysteine-type peptidase activity	molecular_function	0.0075184	0.47126	156	8211	240	14362	BTA009797.1,BTA005734.1,BTA024336.1,BTA026676.1,BTA006633.1,BTA019609.1;support_id=CUFF81.261.1,BTA004198.1,BTA001894.1,BTA009877.1,BTA005136.1,BTA017070.1,BTA016674.1,BTA006788.1,BTA001909.1,BTA015121.1,BTA019355.1,BTA027857.1,BTA005900.1;support_id=CUFF25.408.1,BTA029261.1;support_id=CUFF119.484.3,BTA006429.1,BTA021196.1,BTA002977.1,BTA016007.1,BTA027020.2,BTA022369.1,BTA019354.1,BTA003555.1,BT…
GO:0044710	single-organism metabolic process	biological_process	0.0078282	0.48396	1739	8211	2937	14362	BTA027828.1,BTA025579.1,BTA018025.1,BTA004354.1,BTA023257.1,BTA018313.1,BTA007441.1;support_id=CUFF31.446.1,BTA027172.1,BTA012641.1,BTA026254.1,BTA002104.2,BTA007227.1,BTA020426.1,BTA012945.1,BTA020155.1,BTA029876.1,BTA022279.1,BTA009699.1;support_id=CUFF41.528.1,BTA016365.1,BTA002736.1,BTA011193.1,BTA028543.1;support_id=CUFF117.202.1,BTA005848.1,BTA028305.1,BTA006162.1,BTA026986.1,BTA029748.1,BT…
GO:0022857	transmembrane transporter activity	molecular_function	0.0082265	0.50171	816	8211	1352	14362	BTA016354.1,BTA026268.1,BTA026272.1,BTA014720.1,BTA026441.1,BTA022400.2;support_id=CUFF93.91.1,BTA024055.1,BTA003961.1,BTA013938.1,BTA023869.1,BTA003232.1,BTA007195.3,BTA026274.1,BTA018055.1,BTA024257.1,BTA028057.1,BTA017036.1,BTA013524.1,BTA020183.1,BTA012628.1,BTA025946.1,BTA022639.1,BTA013787.1,BTA010664.1,BTA024601.1,BTA000474.1,BTA004618.1,BTA025862.1,BTA010283.1,BTA014848.2,BTA005624.1,BTA0…
GO:0016462	pyrophosphatase activity	molecular_function	0.0084178	0.50226	453	8211	736	14362	BTA006348.1,BTA003158.1,BTA009940.1,BTA007640.1,BTA001616.1,BTA028286.1,BTA017038.1,BTA029099.1,BTA010165.1,BTA017967.1,BTA020594.1,BTA027422.1,BTA021182.1,BTA009046.1,BTA015243.1,BTA025041.1,BTA016777.1,BTA027605.1,BTA005252.1,BTA002105.1,BTA026640.1,BTA022388.1,BTA028187.1,BTA009563.1,BTA022262.1,BTA000782.2,BTA015382.1,BTA000641.1,BTA028127.1,BTA029091.1,BTA009608.1,BTA024708.1,BTA000359.1,BTA…
GO:0017111	nucleoside-triphosphatase activity	molecular_function	0.0085453	0.50226	447	8211	726	14362	BTA016832.1,BTA015059.1,BTA015484.1,BTA030120.1,BTA021668.1,BTA029796.1,BTA029085.1,BTA010049.1,BTA020154.1,BTA021341.1,BTA029921.1,BTA003223.3,BTA009348.1,BTA029556.1,BTA002163.1,BTA006429.1,BTA008471.3,BTA009445.1,BTA025592.1,BTA011788.1,BTA018420.1,BTA022538.1,BTA002304.1,BTA013894.1,BTA003288.1,BTA001461.2,BTA007709.1,BTA023925.1,BTA029176.1,BTA016718.1,BTA000207.1,BTA001332.1,BTA023376.1,BTA…
GO:0006022	aminoglycan metabolic process	biological_process	0.0085694	0.50226	56	8211	79	14362	BTA004819.1,BTA001745.1,BTA023664.1,BTA014782.1;support_id=CUFF61.626.1,BTA015110.1,BTA001979.1,BTA011233.1,BTA014581.1,BTA014095.1,BTA019076.1,BTA028599.1;support_id=CUFF117.323.1,BTA001285.1,BTA022361.1,BTA017215.1,BTA002919.1,BTA000319.1,BTA016396.1,BTA022300.1,BTA013031.1,BTA021555.1,BTA002908.1,BTA023089.1,BTA023731.1,BTA023063.2,BTA004142.1,BTA019173.1,BTA028059.1,BTA002903.1,BTA021787.1,BT…
GO:0098797	plasma membrane protein complex	cellular_component	0.0095308	0.551	39	8211	53	14362	BTA011438.1,BTA022287.1,BTA015269.1,BTA009037.1,BTA022278.1,BTA011448.1,BTA005356.1;support_id=CUFF23.303.1,BTA012447.1,BTA002009.1;support_id=CUFF8.431.1,BTA027714.1,BTA014291.1,BTA013367.1,BTA018671.1,BTA008896.1;support_id=CUFF37.723.2,BTA005234.2,BTA021471.1;support_id=CUFF89.562.1,BTA024826.3,BTA006772.1,BTA021718.1,BTA004710.1,BTA022916.1,BTA020773.1,BTA012852.1,BTA002708.1,BTA019598.1,BTA0…
GO:0004527	exonuclease activity	molecular_function	0.0096452	0.551	83	8211	122	14362	BTA000266.1,BTA009135.1,BTA004780.1;support_id=CUFF21.451.1,BTA020702.2,BTA003560.1,BTA027540.1,BTA007319.1,BTA019494.1,BTA017543.2,BTA009321.1,BTA002481.1,BTA029352.1,BTA024401.1,BTA021671.1,BTA004718.1,BTA027678.1,BTA008454.1,BTA026228.1,BTA029091.1,BTA024483.1,BTA025523.2,BTA020853.2,BTA003091.1,BTA029876.1,BTA019341.1,BTA008957.2;support_id=CUFF38.172.2,BTA003435.1,BTA021590.1,BTA023653.2,BTA…
GO:0043167	ion binding	molecular_function	0.010646	0.60058	2315	8211	3936	14362	BTA013487.1,BTA025860.1,BTA003568.1,BTA005498.1,BTA022279.1,BTA007733.1,BTA002653.1,BTA002926.1,BTA012945.1,BTA009486.1,BTA026985.1,BTA027523.1,BTA004354.1,BTA001284.1,BTA013601.1,BTA028617.2,BTA013015.1,BTA027931.1,BTA023814.1,BTA010518.1,BTA006590.1,BTA011911.1,BTA029742.1,BTA029915.1,BTA020550.1,BTA021806.1,BTA001687.1,BTA007050.1,BTA026113.1,BTA003677.1,BTA020995.1,BTA026168.1,BTA021911.1,BTA…
GO:0001101	response to acid chemical	biological_process	0.01083	0.60343	14	8211	16	14362	BTA002944.1,BTA009554.1;support_id=CUFF41.186.1,BTA023731.1,BTA016631.1,BTA011625.1,BTA005964.1,BTA018619.1,BTA026859.1,BTA027505.1,BTA006289.1,BTA000719.1,BTA002147.1;support_id=CUFF9.207.1,BTA027389.1,BTA027435.1
GO:0006891	intra-Golgi vesicle-mediated transport	biological_process	0.011201	0.61648	23	8211	29	14362	BTA001615.1,BTA008667.1,BTA017784.1,BTA010340.1,BTA023054.1,BTA019232.1,BTA018814.1,BTA006749.1,BTA005624.1,BTA004164.2,BTA022967.1,BTA007524.1,BTA020851.1,BTA013247.5,BTA011739.1,BTA019441.1,BTA029182.1,BTA000404.1,BTA011951.1,BTA014903.1;support_id=CUFF62.196.1,BTA017120.1;support_id=CUFF73.385.1,BTA014793.3,BTA022531.1
GO:1901698	response to nitrogen compound	biological_process	0.011418	0.62082	14	8211	16	14362	BTA020190.1;support_id=CUFF84.148.2,BTA006056.1;support_id=CUFF26.288.2,BTA011625.1,BTA023731.1,BTA010276.1;support_id=CUFF43.403.2,BTA002491.1,BTA009554.1;support_id=CUFF41.186.1,BTA002944.1,BTA002147.1;support_id=CUFF9.207.1,BTA027389.1,BTA026859.1,BTA027505.1,BTA005964.1,BTA018619.1
GO:0070403	NAD+ binding	molecular_function	0.01185	0.63668	11	8211	12	14362	BTA012001.1,BTA028278.1,BTA010289.1,BTA003307.1,BTA012499.1,BTA024947.1,BTA000365.1,BTA002385.1,BTA027325.1,BTA019085.1,BTA004184.1
GO:0003840	gamma-glutamyltransferase activity	molecular_function	0.012119	0.64266	11	8211	12	14362	BTA027944.1,BTA022543.1,BTA022973.1,BTA003768.1,BTA005271.1,BTA027649.1,BTA001108.1,BTA003769.1,BTA021550.1,BTA024000.1,BTA025701.1
GO:0016817	hydrolase activity, acting on acid anhydrides	molecular_function	0.012247	0.64266	518	8211	849	14362	BTA013206.1,BTA027936.1,BTA001188.2,BTA021409.1,BTA024032.1,BTA007672.1,BTA020358.1,BTA025671.1,BTA007169.2,BTA024806.1,BTA028510.1,BTA001385.1,BTA016946.1,BTA022363.1,BTA027948.1,BTA002151.1,BTA027329.2,BTA023828.1,BTA004057.1,BTA025772.1,BTA016673.1,BTA000311.1,BTA002056.1,BTA009375.1,BTA015065.1,BTA026019.1,BTA001304.1,BTA020154.1,BTA015484.1,BTA029796.1,BTA010049.1,BTA004937.1,BTA009445.1,BTA…
GO:0010243	response to organonitrogen compound	biological_process	0.013132	0.68122	11	8211	12	14362	BTA002944.1,BTA010276.1;support_id=CUFF43.403.2,BTA023731.1,BTA002491.1,BTA011625.1,BTA006056.1;support_id=CUFF26.288.2,BTA020190.1;support_id=CUFF84.148.2,BTA005964.1,BTA018619.1,BTA026859.1,BTA002147.1;support_id=CUFF9.207.1
GO:0004857	enzyme inhibitor activity	molecular_function	0.014911	0.76468	72	8211	106	14362	BTA014764.3,BTA029352.1,BTA013358.1,BTA013048.1,BTA001608.1,BTA010383.1,BTA010823.1;support_id=CUFF46.164.2,BTA018126.1,BTA026006.1,BTA001998.1,BTA015537.4,BTA006912.1,BTA018809.1,BTA023731.1,BTA006568.1,BTA021555.1,BTA021379.1,BTA019173.1,BTA010721.1,BTA019493.1;support_id=CUFF81.23.1,BTA017554.2;support_id=CUFF74.779.1,BTA001312.1,BTA016396.1,BTA022518.1,BTA030203.5,BTA009944.1,BTA029132.1,BTA0…
GO:0044459	plasma membrane part	cellular_component	0.016595	0.8415	73	8211	108	14362	BTA009037.1,BTA008539.1,BTA015269.1,BTA014291.1,BTA013367.1,BTA002009.1;support_id=CUFF8.431.1,BTA001331.1;support_id=CUFF5.63.2,BTA011448.1,BTA005356.1;support_id=CUFF23.303.1,BTA007853.1,BTA024826.3,BTA011638.1,BTA006056.1;support_id=CUFF26.288.2,BTA000990.1;support_id=CUFF3.874.1,BTA023997.1;support_id=CUFF98.537.1,BTA022916.1,BTA010461.1,BTA023769.1;support_id=CUFF97.636.1,BTA010353.1,BTA0195…
GO:0033176	proton-transporting V-type ATPase complex	cellular_component	0.017123	0.85864	44	8211	62	14362	BTA007524.1,BTA029078.1,BTA018475.1,BTA013711.1,BTA029770.1,BTA025211.1,BTA014720.1,BTA004057.1,BTA011737.1,BTA006777.1,BTA007225.2,BTA008317.1,BTA011431.1,BTA015367.1,BTA008026.1,BTA013524.1,BTA010658.1,BTA015453.1,BTA004068.1;support_id=CUFF18.493.1,BTA024822.1,BTA001188.2,BTA005419.2,BTA005660.2,BTA006073.1,BTA012553.1,BTA024047.1,BTA022767.1,BTA021977.2,BTA024806.1,BTA002481.1,BTA012129.1,BTA…
GO:0009225	nucleotide-sugar metabolic process	biological_process	0.018132	0.87893	7	8211	7	14362	BTA026738.1,BTA026986.1,BTA023898.1,BTA008055.1,BTA009704.1,BTA018962.1,BTA014819.1
GO:0005543	phospholipid binding	molecular_function	0.018253	0.87893	35	8211	48	14362	BTA013522.1,BTA025778.1,BTA015397.1,BTA024468.1;support_id=CUFF100.497.1,BTA024289.1,BTA027324.1,BTA009657.1,BTA029043.1,BTA027398.1,BTA010594.1,BTA024063.1,BTA007200.1,BTA016737.1,BTA028719.1,BTA000395.1,BTA005731.1,BTA000370.1,BTA007900.1,BTA001433.1,BTA002287.1,BTA000035.1,BTA025919.1,BTA011737.1,BTA002970.1,BTA002021.1;support_id=CUFF8.494.2,BTA029391.1,BTA026182.1,BTA020151.1,BTA024257.1,BTA…
GO:0016818	hydrolase activity, acting on acid anhydrides, in phosphorus-containing anhydrides	molecular_function	0.019049	0.87893	469	8211	770	14362	BTA023376.1,BTA001332.1,BTA016718.1,BTA000207.1,BTA029176.1,BTA023925.1,BTA007709.1,BTA003658.1,BTA001461.2,BTA003288.1,BTA012396.1,BTA019322.1;support_id=CUFF80.266.2,BTA021398.1,BTA000628.1,BTA026190.1,BTA016178.1,BTA007831.1,BTA020043.1,BTA028008.1,BTA006925.1,BTA020338.1,BTA022772.1,BTA029709.1,BTA012427.1,BTA024039.1,BTA002910.1,BTA000209.1,BTA010576.3,BTA021534.2;support_id=CUFF89.776.2,BTA…
GO:0000785	chromatin	cellular_component	0.019102	0.87893	15	8211	18	14362	BTA023627.1;support_id=CUFF97.322.1,BTA014118.1,BTA002147.1;support_id=CUFF9.207.1,BTA001244.1,BTA026719.2,BTA021199.1,BTA005961.1,BTA000870.1,BTA015713.1,BTA026727.1,BTA028744.1;support_id=CUFF117.740.2,BTA003814.2,BTA028691.1,BTA024623.1,BTA000844.1
GO:0006629	lipid metabolic process	biological_process	0.019232	0.87893	335	8211	544	14362	BTA005033.1,BTA018025.1,BTA003886.2;support_id=CUFF17.585.1,BTA014946.1,BTA011169.1,BTA007596.1,BTA001319.1,BTA000644.1,BTA026254.1,BTA010982.1,BTA018313.1,BTA004802.1,BTA015558.1,BTA007227.1,BTA006930.1,BTA000670.1,BTA029124.1,BTA006643.1,BTA003663.1,BTA000358.1,BTA024558.1,BTA019553.1,BTA028305.1,BTA022908.1,BTA029748.1,BTA006141.1,BTA009431.1,BTA018795.1,BTA018809.1,BTA006928.1,BTA005973.1,BTA…
GO:0007338	single fertilization	biological_process	0.019449	0.87893	10	8211	11	14362	BTA003554.1,BTA029918.1,BTA011427.1,BTA009730.1,BTA023871.1,BTA012946.1;support_id=CUFF54.424.1,BTA025375.1,BTA011571.1,BTA008547.1,BTA026575.1
GO:0009566	fertilization	biological_process	0.019449	0.87893	10	8211	11	14362	BTA023871.1,BTA012946.1;support_id=CUFF54.424.1,BTA003554.1,BTA009730.1,BTA011427.1,BTA029918.1,BTA026575.1,BTA008547.1,BTA025375.1,BTA011571.1
GO:0070461	SAGA-type complex	cellular_component	0.01963	0.87893	7	8211	7	14362	BTA018658.1,BTA012191.1,BTA003776.1;support_id=CUFF17.298.2,BTA011244.1,BTA030028.1,BTA013357.1,BTA003766.1;support_id=CUFF17.279.1
GO:0004866	endopeptidase inhibitor activity	molecular_function	0.019734	0.87893	31	8211	42	14362	BTA023731.1,BTA007733.1,BTA006419.1,BTA021555.1,BTA006568.1,BTA024115.1,BTA019173.1,BTA011380.4,BTA029794.1,BTA004856.1,BTA018619.1,BTA016396.1,BTA001312.1,BTA003254.1,BTA000365.1,BTA022391.3,BTA029132.1,BTA009944.1,BTA013048.1,BTA013358.1,BTA029352.1,BTA001608.1,BTA021787.1,BTA006158.1,BTA010384.1,BTA010823.1;support_id=CUFF46.164.2,BTA010383.1,BTA026859.1,BTA015537.4,BTA026006.1,BTA006912.1
GO:0061135	endopeptidase regulator activity	molecular_function	0.019734	0.87893	31	8211	42	14362	BTA006568.1,BTA024115.1,BTA021555.1,BTA006419.1,BTA007733.1,BTA023731.1,BTA011380.4,BTA019173.1,BTA004856.1,BTA029794.1,BTA016396.1,BTA001312.1,BTA018619.1,BTA022391.3,BTA000365.1,BTA003254.1,BTA029352.1,BTA013048.1,BTA013358.1,BTA009944.1,BTA029132.1,BTA010823.1;support_id=CUFF46.164.2,BTA010383.1,BTA021787.1,BTA010384.1,BTA006158.1,BTA001608.1,BTA006912.1,BTA026006.1,BTA026859.1,BTA015537.4
GO:0050830	defense response to Gram-positive bacterium	biological_process	0.01977	0.87893	7	8211	7	14362	BTA007835.1,BTA024645.1,BTA026458.3,BTA029331.1,BTA029270.2,BTA003046.3,BTA005145.1
GO:0070851	growth factor receptor binding	molecular_function	0.020158	0.87893	17	8211	21	14362	BTA004509.1,BTA005481.1,BTA014047.1,BTA001218.1,BTA007270.1,BTA014730.1,BTA014718.1;support_id=CUFF61.485.1,BTA030080.1;support_id=CUFF124.202.1,BTA006694.1,BTA001895.1,BTA005890.1,BTA005145.1,BTA026728.3,BTA028936.1,BTA021074.1;support_id=CUFF87.684.1,BTA017992.1;support_id=CUFF75.997.1,BTA030183.1
GO:0007052	mitotic spindle organization	biological_process	0.020464	0.87893	7	8211	7	14362	BTA011244.1,BTA006047.1,BTA030028.1,BTA020008.2,BTA019773.1,BTA021350.1,BTA019751.1
GO:1901700	response to oxygen-containing compound	biological_process	0.02055	0.87893	27	8211	36	14362	BTA011625.1,BTA006056.1;support_id=CUFF26.288.2,BTA002491.1,BTA020190.1;support_id=CUFF84.148.2,BTA002944.1,BTA009208.1,BTA002147.1;support_id=CUFF9.207.1,BTA019460.1,BTA027505.1,BTA030163.1,BTA026859.1,BTA005964.1,BTA016574.1,BTA006289.1,BTA010789.1,BTA016631.1,BTA023731.1,BTA010276.1;support_id=CUFF43.403.2,BTA004558.1,BTA009554.1;support_id=CUFF41.186.1,BTA027435.1,BTA027389.1,BTA000415.1,BTA0…
GO:0004618	phosphoglycerate kinase activity	molecular_function	0.020556	0.87893	7	8211	7	14362	BTA018111.1,BTA022589.4,BTA001602.1,BTA018016.1,BTA020438.1,BTA018000.1,BTA012322.1
GO:0016755	transferase activity, transferring amino-acyl groups	molecular_function	0.020644	0.87893	25	8211	33	14362	BTA027802.1,BTA020866.1,BTA001108.1,BTA003769.1,BTA002752.1,BTA006335.1,BTA025701.1,BTA000306.1,BTA006711.1,BTA007880.1,BTA002232.3,BTA009567.2;support_id=CUFF41.222.1,BTA016012.1,BTA027944.1,BTA003768.1,BTA029664.2,BTA022973.1,BTA024000.1,BTA006911.1,BTA021550.1,BTA006912.1,BTA027649.1,BTA005271.1,BTA022543.1,BTA014562.1
GO:0030212	hyaluronan metabolic process	biological_process	0.021102	0.88178	7	8211	7	14362	BTA021787.1,BTA021555.1,BTA023731.1,BTA016396.1,BTA018619.1,BTA026859.1,BTA019173.1
GO:1903510	mucopolysaccharide metabolic process	biological_process	0.021102	0.88178	7	8211	7	14362	BTA021555.1,BTA021787.1,BTA023731.1,BTA016396.1,BTA018619.1,BTA026859.1,BTA019173.1
GO:0006778	porphyrin-containing compound metabolic process	biological_process	0.021425	0.88709	50	8211	72	14362	BTA018438.1,BTA007292.1,BTA009855.1,BTA001319.1,BTA021906.3,BTA003577.1,BTA014798.1,BTA007388.2,BTA020890.1,BTA018090.1,BTA019657.1,BTA018685.1,BTA018743.1,BTA003085.1;support_id=CUFF13.76.1,BTA025709.1,BTA024706.1,BTA011256.1,BTA000425.1,BTA011434.1,BTA008540.1,BTA026055.1,BTA022288.1,BTA018285.1,BTA023144.1,BTA027042.1,BTA028572.1,BTA022324.1,BTA027848.1,BTA027948.1,BTA010956.1,BTA016540.1,BTA0…
GO:0006323	DNA packaging	biological_process	0.021785	0.89378	40	8211	56	14362	BTA026715.1,BTA000844.1,BTA008562.1,BTA026114.1;support_id=CUFF107.558.1,BTA025480.1,BTA022409.1,BTA020719.1;support_id=CUFF86.420.1,BTA026905.1,BTA021199.1,BTA001350.1,BTA013833.1,BTA030195.1,BTA008033.1,BTA017043.1,BTA001244.1,BTA012945.1,BTA003814.2,BTA014089.3,BTA009375.1,BTA017360.1,BTA026707.1,BTA022673.1;support_id=CUFF94.87.1,BTA003232.1,BTA023383.1,BTA023627.1;support_id=CUFF97.322.1,BTA…
GO:0005234	extracellular-glutamate-gated ion channel activity	molecular_function	0.023367	0.95006	21	8211	27	14362	BTA003829.1,BTA003830.1,BTA029020.1,BTA029327.1,BTA029510.1,BTA013787.1,BTA009899.1,BTA013833.1,BTA013790.1,BTA002161.1,BTA013861.1,BTA004901.1,BTA024087.1,BTA009143.1;support_id=CUFF39.179.2,BTA012755.1,BTA020122.1,BTA012756.1,BTA002153.1,BTA008214.1,BTA004639.1,BTA029145.1
GO:0030118	clathrin coat	cellular_component	0.024831	0.99261	12	8211	14	14362	BTA028948.1,BTA003821.1,BTA022916.1,BTA011737.1,BTA026255.1,BTA013352.1,BTA023219.1,BTA024826.3,BTA009864.1,BTA011438.1,BTA000946.1,BTA007004.1
GO:0071103	DNA conformation change	biological_process	0.024879	0.99261	65	8211	96	14362	BTA014288.1,BTA009887.1;support_id=CUFF42.234.1,BTA020083.1,BTA009554.1;support_id=CUFF41.186.1,BTA014578.1,BTA003929.1,BTA009932.1,BTA002374.1,BTA015231.1,BTA003223.3,BTA006472.1,BTA023255.1,BTA000067.1;support_id=CUFF1.157.1,BTA026719.2,BTA029395.1,BTA006475.1;support_id=CUFF28.23.1,BTA026905.1,BTA020719.1;support_id=CUFF86.420.1,BTA026114.1;support_id=CUFF107.558.1,BTA019322.1;support_id=CUFF8…
GO:0042440	pigment metabolic process	biological_process	0.025074	0.99261	76	8211	114	14362	BTA003300.1,BTA015064.1,BTA018339.1,BTA007301.1,BTA013454.1,BTA012257.4,BTA000515.1,BTA018355.1,BTA003200.1,BTA001993.1,BTA008354.1,BTA004857.1,BTA000549.1,BTA000908.1,BTA017774.1,BTA022324.1,BTA027785.1,BTA016527.1,BTA027042.1,BTA027040.1,BTA007014.1,BTA028083.1,BTA022288.1,BTA023144.1,BTA000425.1,BTA011256.1,BTA011434.1,BTA003085.1;support_id=CUFF13.76.1,BTA001472.1,BTA024706.1,BTA018743.1,BTA0…
GO:0007265	Ras protein signal transduction	biological_process	0.025739	0.99998	34	8211	47	14362	BTA026070.1,BTA026048.1,BTA016853.1,BTA001736.1,BTA013087.1,BTA015686.1,BTA013672.1,BTA026025.1,BTA003837.1,BTA006176.1,BTA028620.1,BTA002691.1,BTA010904.2,BTA029495.1,BTA014281.1,BTA029000.1,BTA003650.1,BTA004334.3,BTA007929.1,BTA023624.2,BTA001940.1,BTA022079.1,BTA012552.1,BTA021082.1,BTA009293.1,BTA022666.2,BTA004630.1,BTA017901.1,BTA010379.1,BTA004676.1,BTA026049.1,BTA004687.1,BTA007965.1,BTA…
GO:0046578	regulation of Ras protein signal transduction	biological_process	0.025739	0.99998	34	8211	47	14362	BTA004676.1,BTA026049.1,BTA004687.1,BTA007965.1,BTA009866.1,BTA001940.1,BTA022079.1,BTA021082.1,BTA012552.1,BTA009293.1,BTA022666.2,BTA004630.1,BTA017901.1,BTA010379.1,BTA006176.1,BTA003837.1,BTA028620.1,BTA002691.1,BTA010904.2,BTA029495.1,BTA014281.1,BTA029000.1,BTA003650.1,BTA004334.3,BTA007929.1,BTA023624.2,BTA026070.1,BTA016853.1,BTA026048.1,BTA013087.1,BTA001736.1,BTA015686.1,BTA013672.1,BTA…
GO:0006468	protein phosphorylation	biological_process	0.025924	0.99998	193	8211	307	14362	BTA000973.1,BTA005964.1,BTA028703.1,BTA007646.1,BTA003172.1,BTA022037.1,BTA005621.1,BTA009876.2,BTA029424.1,BTA029405.1;support_id=CUFF120.341.1,BTA004220.2,BTA026712.1,BTA010204.1,BTA007372.1,BTA024058.1,BTA009423.1,BTA015824.1,BTA005650.1;support_id=CUFF24.628.1,BTA017199.1,BTA003628.1,BTA005103.2,BTA009791.1,BTA029468.1,BTA010416.1,BTA007523.2,BTA007605.1,BTA002804.1,BTA022925.3,BTA027511.1,BT…
GO:0004842	ubiquitin-protein transferase activity	molecular_function	0.027008	1	87	8211	132	14362	BTA027797.1,BTA027501.1,BTA019963.2,BTA026299.1,BTA021878.1,BTA015980.1,BTA025849.1,BTA014775.1,BTA029171.1,BTA003222.1,BTA028518.1,BTA025516.1,BTA020192.1,BTA017044.1,BTA029559.1,BTA012182.1,BTA025998.2,BTA027376.1,BTA014864.1,BTA006452.1,BTA027512.1,BTA016024.1,BTA013836.1,BTA003403.1,BTA023133.1,BTA025600.1,BTA023026.1,BTA000314.1,BTA003851.1,BTA015163.1,BTA009963.1,BTA020641.2;support_id=CUFF…
GO:0019787	ubiquitin-like protein transferase activity	molecular_function	0.027008	1	87	8211	132	14362	BTA016422.1,BTA006058.1,BTA007192.1,BTA026807.1,BTA023668.1;support_id=CUFF97.406.1,BTA000059.1,BTA001225.1,BTA006927.1,BTA029334.1,BTA017134.1,BTA024253.1,BTA015723.1,BTA019160.1,BTA015231.1,BTA021367.2,BTA002358.1,BTA004291.1,BTA025594.1,BTA022427.3,BTA001567.1,BTA001277.1,BTA022132.1,BTA002494.1,BTA004307.1,BTA020425.1,BTA001870.1,BTA014052.1,BTA010818.1,BTA006479.1,BTA029455.2,BTA000335.1,BTA…
GO:0048037	cofactor binding	molecular_function	0.027857	1	342	8211	559	14362	BTA020712.1,BTA012679.1,BTA023744.1,BTA000505.1,BTA010956.1,BTA013258.1,BTA013390.1,BTA030030.3,BTA028901.1,BTA024325.1,BTA021411.1,BTA007376.1,BTA019649.1,BTA000828.1,BTA020767.1,BTA023937.1,BTA021135.1,BTA010289.1,BTA009321.1,BTA018806.1,BTA027797.1,BTA023316.1,BTA003848.1;support_id=CUFF17.478.1,BTA006165.1,BTA018446.1,BTA003202.1,BTA028278.1,BTA025415.1,BTA027035.1,BTA023203.2,BTA009855.1,BTA…
GO:0004114	3',5'-cyclic-nucleotide phosphodiesterase activity	molecular_function	0.029295	1	14	8211	17	14362	BTA017077.1,BTA022733.3,BTA020339.1,BTA029401.1,BTA005175.1,BTA016175.1,BTA028372.1,BTA021189.1,BTA026614.1,BTA022196.1,BTA029534.1,BTA021994.1,BTA025528.1,BTA021303.1
GO:0005337	nucleoside transmembrane transporter activity	molecular_function	0.030024	1	9	8211	10	14362	BTA013521.1,BTA025557.1,BTA029375.1,BTA002372.1,BTA009093.1;support_id=CUFF39.71.1,BTA015410.1,BTA028057.1,BTA006659.1,BTA027164.1
GO:0008408	3'-5' exonuclease activity	molecular_function	0.030921	1	35	8211	49	14362	BTA001854.1,BTA007171.1,BTA018787.1,BTA012602.1,BTA010317.1,BTA002872.1,BTA023653.2,BTA021590.1,BTA007170.1,BTA024003.1,BTA008957.2;support_id=CUFF38.172.2,BTA002494.1,BTA019341.1,BTA029876.1,BTA004135.1,BTA020650.1,BTA018507.1,BTA027809.1,BTA021589.1,BTA019341.1;support_id=CUFF80.322.1,BTA024979.1,BTA025523.2,BTA008597.1,BTA027579.1,BTA016278.1,BTA021671.1,BTA008454.1,BTA021361.1,BTA010209.1,BTA…
GO:0000042	protein targeting to Golgi	biological_process	0.030965	1	9	8211	10	14362	BTA019441.1,BTA029182.1,BTA006749.1,BTA010340.1,BTA017784.1,BTA008667.1,BTA004164.2,BTA005624.1,BTA022967.1
GO:0000301	retrograde transport, vesicle recycling within Golgi	biological_process	0.030965	1	9	8211	10	14362	BTA019441.1,BTA029182.1,BTA008667.1,BTA017784.1,BTA010340.1,BTA006749.1,BTA005624.1,BTA004164.2,BTA022967.1
GO:0034067	protein localization to Golgi apparatus	biological_process	0.030965	1	9	8211	10	14362	BTA019441.1,BTA006749.1,BTA008667.1,BTA017784.1,BTA010340.1,BTA029182.1,BTA022967.1,BTA004164.2,BTA005624.1
GO:0072600	establishment of protein localization to Golgi	biological_process	0.030965	1	9	8211	10	14362	BTA019441.1,BTA029182.1,BTA008667.1,BTA017784.1,BTA010340.1,BTA006749.1,BTA005624.1,BTA004164.2,BTA022967.1
GO:0044765	single-organism transport	biological_process	0.032014	1	988	8211	1664	14362	BTA009264.1,BTA030126.1,BTA006033.1,BTA029118.2,BTA021476.1,BTA004164.2,BTA019411.1,BTA000586.1,BTA011426.1,BTA009531.1,BTA011745.1,BTA002872.1,BTA011951.1,BTA004904.1,BTA018316.1,BTA004651.1,BTA006898.1,BTA027033.1,BTA000224.1,BTA013384.1,BTA025540.3,BTA011431.1,BTA001985.1,BTA022453.1,BTA029738.1,BTA014011.1,BTA011872.1,BTA004323.1;support_id=CUFF19.529.2,BTA005495.1,BTA019582.1,BTA007655.2,BTA…
GO:0009378	four-way junction helicase activity	molecular_function	0.032042	1	57	8211	84	14362	BTA011326.1,BTA005252.1,BTA018546.1,BTA030015.1,BTA021182.1,BTA016832.1,BTA019304.1,BTA015448.1,BTA023013.1,BTA028510.1,BTA010049.1,BTA030186.1,BTA016230.1,BTA012406.1,BTA016043.1,BTA016946.1,BTA014327.2,BTA007899.1,BTA017368.1,BTA024053.1,BTA016243.1,BTA027934.1,BTA019459.1,BTA014512.1,BTA009197.1;support_id=CUFF39.334.1,BTA013160.1,BTA020738.1,BTA007197.1,BTA020338.1,BTA000523.1,BTA008129.2,BTA…
GO:0005044	scavenger receptor activity	molecular_function	0.033117	1	9	8211	10	14362	BTA023205.1;support_id=CUFF96.108.1,BTA014100.2,BTA024249.1,BTA016674.1,BTA009558.1,BTA015901.1,BTA005349.1;support_id=CUFF23.292.1,BTA014095.1,BTA024584.1
GO:0038024	cargo receptor activity	molecular_function	0.033117	1	9	8211	10	14362	BTA009558.1,BTA024584.1,BTA014095.1,BTA015901.1,BTA005349.1;support_id=CUFF23.292.1,BTA016674.1,BTA023205.1;support_id=CUFF96.108.1,BTA014100.2,BTA024249.1
GO:0044699	single-organism process	biological_process	0.033221	1	3342	8211	5748	14362	BTA013037.1,BTA022514.1,BTA016365.1,BTA019712.1,BTA002736.1,BTA028543.1;support_id=CUFF117.202.1,BTA026024.1,BTA005848.1,BTA021952.1,BTA015161.1,BTA027828.1,BTA013806.2,BTA025579.1,BTA019699.1,BTA000533.1,BTA027172.1,BTA002104.2,BTA007441.1;support_id=CUFF31.446.1,BTA003784.1;support_id=CUFF17.316.1,BTA000306.1,BTA017933.1,BTA019493.1;support_id=CUFF81.23.1,BTA023112.1,BTA018830.1,BTA029380.1,BTA…
16396.1,BTA005934.1,BTA023978.1,BTA022413.1,BTA023639.1,BTA020949.1,BTA001331.1;support_id=CUFF5.63.2,BTA024221.1,BTA021487.2,BTA013367.1,BTA001485.1,BTA011156.1,BTA011503.1,BTA000551.1,BTA020125.1,BTA027426.1,BTA019668.1,BTA020067.1,BTA017915.2,BTA004775.1,BTA023809.3,BTA011518.1,BTA021918.1,BTA015659.1,BTA017595.1,BTA027378.1,BTA014804.1,BTA016401.1,BTA021376.1,BTA005515.1,BTA022945.1,BTA021614…
GO:0022891	substrate-specific transmembrane transporter activity	molecular_function	0.034246	1	615	8211	1025	14362	BTA004068.1;support_id=CUFF18.493.1,BTA022397.1,BTA010679.1,BTA015453.1,BTA013789.1,BTA024407.3,BTA009092.2,BTA009298.1,BTA003546.1,BTA023654.1,BTA009308.1,BTA003784.1;support_id=CUFF17.316.1,BTA009037.1,BTA017933.1,BTA000306.1,BTA022315.1,BTA015269.1,BTA021528.1,BTA026255.1,BTA001978.1,BTA023660.1,BTA003679.1,BTA015018.1,BTA020733.1,BTA016365.1,BTA011193.1,BTA009655.1,BTA020155.1,BTA009627.1,BTA…
GO:0046148	pigment biosynthetic process	biological_process	0.035311	1	66	8211	99	14362	BTA021578.1,BTA023899.1,BTA000674.1,BTA029372.1;support_id=CUFF120.236.3,BTA000490.1,BTA027968.1,BTA027797.1,BTA006137.1,BTA022980.1,BTA007016.1,BTA027848.1,BTA027948.1,BTA028572.1,BTA013390.1,BTA023455.1,BTA006928.1,BTA019496.1,BTA018285.1,BTA022189.1,BTA020902.1,BTA015558.1,BTA025709.1,BTA018090.1,BTA003202.1,BTA025235.1,BTA009855.1,BTA005938.1,BTA003300.1,BTA007301.1,BTA013454.1,BTA018339.1,BT…
GO:0051287	NAD binding	molecular_function	0.035527	1	97	8211	150	14362	BTA026326.1,BTA010289.1,BTA023937.1,BTA027975.1,BTA020767.1,BTA023461.1,BTA000828.1,BTA024325.1,BTA000656.1,BTA006137.1,BTA018697.1,BTA023899.1,BTA000560.1,BTA013728.1,BTA018385.1,BTA022299.1,BTA023445.1,BTA024449.1,BTA000505.1,BTA030059.1,BTA000499.1,BTA018819.1,BTA012679.1,BTA020712.1,BTA028901.1,BTA006928.1,BTA010605.1,BTA005973.1,BTA030030.3,BTA022002.1,BTA005557.1,BTA027848.1,BTA010956.1,BTA…
GO:1901505	carbohydrate derivative transporter activity	molecular_function	0.035816	1	11	8211	13	14362	BTA003147.1,BTA013521.1,BTA025557.1,BTA029375.1,BTA002372.1,BTA020008.2,BTA009093.1;support_id=CUFF39.71.1,BTA015410.1,BTA028057.1,BTA006659.1,BTA027164.1
GO:0048193	Golgi vesicle transport	biological_process	0.035982	1	75	8211	114	14362	BTA007518.1,BTA007677.1,BTA016737.1,BTA003619.1,BTA015817.1,BTA010806.1,BTA029182.1,BTA022564.1,BTA014903.1;support_id=CUFF62.196.1,BTA027426.1,BTA018069.1;support_id=CUFF76.115.1,BTA022920.1,BTA020949.1,BTA028775.1,BTA024289.1,BTA002761.1,BTA006749.1,BTA019232.1,BTA023054.1,BTA007672.1,BTA029464.1,BTA025540.3,BTA016227.1,BTA016708.1,BTA017507.1,BTA004620.1;support_id=CUFF20.433.2,BTA021971.1,BTA…
GO:0004176	ATP-dependent peptidase activity	molecular_function	0.036154	1	6	8211	6	14362	BTA004866.1,BTA000523.1,BTA020738.1,BTA002843.1,BTA024708.1,BTA018370.1
GO:0034220	ion transmembrane transport	biological_process	0.036291	1	150	8211	238	14362	BTA026401.1,BTA009208.1,BTA018661.1,BTA018679.1,BTA004718.1,BTA026977.1;support_id=CUFF111.226.1,BTA014855.1,BTA004775.1,BTA023399.1,BTA011581.1,BTA028127.1,BTA019668.1,BTA011448.1,BTA015397.1,BTA003842.1;support_id=CUFF17.464.1,BTA005419.2,BTA017930.1;support_id=CUFF75.851.2,BTA023639.1,BTA019245.1,BTA002481.1,BTA004007.1,BTA008539.1,BTA001407.1,BTA004620.1;support_id=CUFF20.433.2,BTA021661.1,BT…
GO:1902578	single-organism localization	biological_process	0.036706	1	1006	8211	1697	14362	BTA007962.1,BTA021718.1,BTA010213.1,BTA016180.1,BTA027525.1,BTA010826.1,BTA000941.1,BTA004373.3,BTA011410.1,BTA008206.2,BTA022540.1,BTA003766.1,BTA016991.1,BTA019147.1,BTA009423.1,BTA017818.1,BTA003887.1,BTA006078.1,BTA028537.1,BTA012129.1,BTA000709.1,BTA000646.1,BTA001603.1,BTA025236.3,BTA021667.1,BTA015448.1,BTA028313.1,BTA019817.2,BTA012553.1,BTA023371.1,BTA011719.1,BTA006073.1,BTA000059.1,BTA…
GO:0007600	sensory perception	biological_process	0.037536	1	32	8211	45	14362	BTA025681.1,BTA005332.1,BTA012181.1,BTA025669.1,BTA008684.1,BTA019844.1,BTA000058.1,BTA011083.1,BTA010390.1,BTA029534.1,BTA022442.1,BTA029629.1,BTA006057.1,BTA020191.1,BTA015292.1,BTA007472.1,BTA011738.1,BTA011081.1,BTA024330.1,BTA023783.1,BTA020339.1,BTA003088.3,BTA026223.1,BTA017554.2,BTA007633.1,BTA024333.3,BTA007715.1,BTA013709.1,BTA011569.1,BTA024331.1,BTA024498.1,BTA001598.1
GO:0050877	neurological system process	biological_process	0.037536	1	32	8211	45	14362	BTA000058.1,BTA011083.1,BTA019844.1,BTA012181.1,BTA005332.1,BTA025669.1,BTA025681.1,BTA008684.1,BTA029629.1,BTA022442.1,BTA010390.1,BTA029534.1,BTA026223.1,BTA023783.1,BTA024330.1,BTA020339.1,BTA003088.3,BTA015292.1,BTA020191.1,BTA006057.1,BTA011738.1,BTA007472.1,BTA011081.1,BTA007715.1,BTA013709.1,BTA024498.1,BTA001598.1,BTA024331.1,BTA011569.1,BTA017554.2,BTA024333.3,BTA007633.1
GO:0006614	SRP-dependent cotranslational protein targeting to membrane	biological_process	0.037866	1	34	8211	48	14362	BTA022409.1,BTA006565.1,BTA021970.1,BTA023828.1,BTA003678.2,BTA024732.1,BTA009528.1,BTA021666.1,BTA023925.1,BTA026136.1,BTA017043.1,BTA009375.1,BTA009310.1,BTA024292.2,BTA018414.1,BTA003232.1,BTA010320.1,BTA004651.1,BTA018316.1,BTA009536.1,BTA012410.1,BTA013015.1,BTA000678.1,BTA000563.1,BTA009697.1,BTA005252.1,BTA019408.1,BTA015059.1,BTA022315.1,BTA022227.1,BTA000359.1,BTA022312.1,BTA009563.1,BTA…
GO:0045047	protein targeting to ER	biological_process	0.037866	1	34	8211	48	14362	BTA003223.3,BTA009563.1,BTA022312.1,BTA000359.1,BTA022315.1,BTA015059.1,BTA022227.1,BTA019408.1,BTA009697.1,BTA000563.1,BTA005252.1,BTA009536.1,BTA012410.1,BTA013015.1,BTA000678.1,BTA004651.1,BTA010320.1,BTA018316.1,BTA003232.1,BTA009310.1,BTA009375.1,BTA024292.2,BTA018414.1,BTA023925.1,BTA026136.1,BTA017043.1,BTA009528.1,BTA021666.1,BTA021970.1,BTA023828.1,BTA003678.2,BTA024732.1,BTA022409.1,BTA…
GO:0072599	establishment of protein localization to endoplasmic reticulum	biological_process	0.037866	1	34	8211	48	14362	BTA022409.1,BTA006565.1,BTA023828.1,BTA021970.1,BTA024732.1,BTA003678.2,BTA021666.1,BTA009528.1,BTA026136.1,BTA023925.1,BTA017043.1,BTA009375.1,BTA009310.1,BTA018414.1,BTA024292.2,BTA003232.1,BTA010320.1,BTA004651.1,BTA018316.1,BTA009536.1,BTA012410.1,BTA000678.1,BTA013015.1,BTA005252.1,BTA000563.1,BTA009697.1,BTA019408.1,BTA022227.1,BTA022315.1,BTA015059.1,BTA000359.1,BTA022312.1,BTA009563.1,BTA…
GO:0044248	cellular catabolic process	biological_process	0.038032	1	184	8211	295	14362	BTA024952.1,BTA029361.1,BTA026237.1,BTA000687.1,BTA014244.1,BTA010956.1,BTA027547.1,BTA019076.1,BTA003863.1,BTA001991.1,BTA016024.1,BTA008360.1,BTA019494.1,BTA019408.1,BTA000221.1,BTA025041.1,BTA006611.1,BTA009135.1,BTA020702.2,BTA000363.1,BTA011443.1,BTA003560.1,BTA021878.1,BTA017244.1,BTA002407.1,BTA007388.2,BTA011396.1,BTA029079.1,BTA006125.1,BTA020899.2,BTA012723.1,BTA020149.1,BTA008367.1,BTA…
GO:0006030	chitin metabolic process	biological_process	0.038231	1	32	8211	45	14362	BTA017356.1,BTA016652.1,BTA022019.1,BTA020881.1,BTA021517.1,BTA030178.1,BTA003349.1,BTA007810.1,BTA014100.2,BTA012172.1,BTA011522.1,BTA002921.1,BTA028458.1,BTA016176.1,BTA002906.1,BTA002997.1,BTA002905.1,BTA015118.2,BTA012170.1,BTA001979.1,BTA014782.1;support_id=CUFF61.626.1,BTA015110.1,BTA028599.1;support_id=CUFF117.323.1,BTA011233.1,BTA014581.1,BTA014095.1,BTA001285.1,BTA002919.1,BTA004142.1,BT…
GO:1901071	glucosamine-containing compound metabolic process	biological_process	0.038231	1	32	8211	45	14362	BTA020881.1,BTA003349.1,BTA030178.1,BTA021517.1,BTA022019.1,BTA016652.1,BTA017356.1,BTA002997.1,BTA002906.1,BTA012170.1,BTA015118.2,BTA002905.1,BTA002921.1,BTA016176.1,BTA028458.1,BTA012172.1,BTA014100.2,BTA007810.1,BTA011522.1,BTA014581.1,BTA011233.1,BTA014095.1,BTA028599.1;support_id=CUFF117.323.1,BTA001979.1,BTA014782.1;support_id=CUFF61.626.1,BTA015110.1,BTA002908.1,BTA023063.2,BTA004142.1,BT…
GO:0004616	phosphogluconate dehydrogenase (decarboxylating) activity	molecular_function	0.038569	1	32	8211	45	14362	BTA019700.1,BTA021614.1,BTA022288.1,BTA018285.1,BTA002989.1,BTA001472.1,BTA008113.1,BTA006703.1,BTA018025.1,BTA003680.1,BTA023599.1,BTA012322.1,BTA021906.3,BTA015060.1,BTA000644.1,BTA006592.1,BTA023461.1,BTA002374.1;support_id=CUFF10.329.2,BTA003848.1;support_id=CUFF17.478.1,BTA013281.1,BTA018697.1,BTA012257.4,BTA000560.1,BTA002186.1,BTA010921.1,BTA020712.1,BTA000499.1,BTA006928.1,BTA000549.1,BTA…
GO:0098589	membrane region	cellular_component	0.038722	1	11	8211	13	14362	BTA024826.3,BTA018619.1,BTA011438.1,BTA005964.1,BTA026859.1,BTA002147.1;support_id=CUFF9.207.1,BTA000946.1,BTA002944.1,BTA022916.1,BTA023731.1,BTA011625.1
GO:0000175	3'-5'-exoribonuclease activity	molecular_function	0.039364	1	11	8211	13	14362	BTA012602.1,BTA018787.1,BTA002494.1,BTA002872.1,BTA010317.1,BTA003560.1,BTA021671.1,BTA027809.1,BTA024003.1,BTA021589.1,BTA007170.1
GO:0016032	viral process	biological_process	0.040093	1	187	8211	300	14362	BTA013767.1,BTA018535.1,BTA009783.2;support_id=CUFF42.60.1,BTA001332.1,BTA029594.1,BTA027857.1,BTA020043.1,BTA006836.1,BTA020199.1;support_id=CUFF84.171.1,BTA013788.1,BTA016721.2;support_id=CUFF71.849.1,BTA004159.1,BTA021038.2,BTA002147.1;support_id=CUFF9.207.1,BTA023383.1,BTA014602.1,BTA001442.2,BTA004745.1,BTA011227.1,BTA000767.2,BTA016604.1,BTA021174.1,BTA000526.1,BTA015059.1,BTA021393.1,BTA01…
GO:0001932	regulation of protein phosphorylation	biological_process	0.040916	1	13	8211	16	14362	BTA026859.1,BTA018619.1,BTA005964.1,BTA015558.1,BTA014842.1,BTA002108.1,BTA002147.1;support_id=CUFF9.207.1,BTA000111.1,BTA027118.1,BTA002944.1,BTA019417.1,BTA011625.1,BTA023731.1
GO:0004867	serine-type endopeptidase inhibitor activity	molecular_function	0.041001	1	21	8211	28	14362	BTA018619.1,BTA001312.1,BTA016396.1,BTA007733.1,BTA023731.1,BTA006568.1,BTA024115.1,BTA021555.1,BTA006419.1,BTA019173.1,BTA001608.1,BTA010823.1;support_id=CUFF46.164.2,BTA021787.1,BTA026006.1,BTA026859.1,BTA015537.4,BTA000365.1,BTA003254.1,BTA009944.1,BTA029132.1,BTA029352.1
GO:0044723	single-organism carbohydrate metabolic process	biological_process	0.041218	1	180	8211	288	14362	BTA002977.1,BTA023266.1,BTA008549.1,BTA030090.1,BTA009126.1,BTA030182.1,BTA001159.1,BTA003927.1,BTA017163.1,BTA005964.1,BTA021471.1;support_id=CUFF89.562.1,BTA007659.1,BTA028836.1,BTA011916.2,BTA009935.1,BTA018431.1,BTA012395.1,BTA021696.1,BTA019370.1,BTA011631.2,BTA000820.1,BTA007283.1,BTA010487.1,BTA001161.1,BTA027966.1,BTA000526.1,BTA024733.1,BTA024463.1,BTA014318.1,BTA027388.3,BTA012322.1,BTA…
GO:0030258	lipid modification	biological_process	0.041965	1	17	8211	22	14362	BTA008549.1,BTA026254.1,BTA010984.1,BTA003255.1,BTA023269.1,BTA002144.1,BTA011171.1,BTA006141.1,BTA006020.1,BTA003896.1,BTA019553.1,BTA000363.1,BTA020621.1,BTA028898.1,BTA000343.1,BTA023611.1,BTA001941.1
GO:0033177	proton-transporting two-sector ATPase complex, proton-transporting domain	cellular_component	0.042088	1	45	8211	66	14362	BTA009531.1,BTA013711.1,BTA018475.1,BTA011358.1;support_id=CUFF48.12.4,BTA007524.1,BTA025211.1,BTA026441.1,BTA009264.1,BTA020155.1,BTA004882.1,BTA000474.1,BTA013064.1,BTA007225.2,BTA020035.1,BTA010658.1,BTA008026.1,BTA005660.2,BTA003842.1;support_id=CUFF17.464.1,BTA028178.1,BTA004068.1;support_id=CUFF18.493.1,BTA018445.1,BTA015453.1,BTA006464.1,BTA010679.1,BTA012129.1,BTA002481.1,BTA005669.2,BTA0…
GO:0042221	response to chemical	biological_process	0.042404	1	122	8211	192	14362	BTA000306.1,BTA025669.1,BTA027389.1,BTA012979.1,BTA025681.1,BTA020481.1,BTA011388.1,BTA027802.1,BTA010850.1,BTA001520.1,BTA023461.1,BTA019417.1,BTA011083.1,BTA026299.1,BTA023731.1,BTA028775.1,BTA025459.1,BTA017741.1,BTA011156.1,BTA014618.1,BTA004558.1,BTA007440.1,BTA000849.1,BTA016012.1,BTA027176.1,BTA001819.1,BTA026265.1;support_id=CUFF108.147.1,BTA017116.1,BTA006478.2,BTA006289.1,BTA016574.1,BT…
GO:0006836	neurotransmitter transport	biological_process	0.042488	1	17	8211	22	14362	BTA017818.1,BTA002008.1;support_id=CUFF8.429.1,BTA026613.1,BTA018534.1,BTA027356.1,BTA005800.1,BTA029006.2,BTA025656.1,BTA029081.1,BTA030017.3,BTA027120.1,BTA023897.1,BTA001331.1;support_id=CUFF5.63.2,BTA005669.2,BTA004620.1,BTA016373.1,BTA005667.1
GO:0019354	siroheme biosynthetic process	biological_process	0.042946	1	28	8211	39	14362	BTA021906.3,BTA006928.1,BTA017774.1,BTA014798.1,BTA003577.1,BTA000549.1,BTA022324.1,BTA018438.1,BTA009855.1,BTA027848.1,BTA012257.4,BTA020890.1,BTA007016.1,BTA018355.1,BTA022980.1,BTA018090.1,BTA000425.1,BTA015064.1,BTA006137.1,BTA011434.1,BTA027797.1,BTA025709.1,BTA000490.1,BTA023899.1,BTA003300.1,BTA027042.1,BTA022288.1,BTA018285.1
GO:0043115	precorrin-2 dehydrogenase activity	molecular_function	0.042946	1	28	8211	39	14362	BTA003300.1,BTA027042.1,BTA022288.1,BTA018285.1,BTA027797.1,BTA011434.1,BTA006137.1,BTA000425.1,BTA015064.1,BTA023899.1,BTA025709.1,BTA000490.1,BTA012257.4,BTA018090.1,BTA020890.1,BTA007016.1,BTA018355.1,BTA022980.1,BTA017774.1,BTA003577.1,BTA014798.1,BTA000549.1,BTA021906.3,BTA006928.1,BTA027848.1,BTA009855.1,BTA022324.1,BTA018438.1
GO:0046156	siroheme metabolic process	biological_process	0.042946	1	28	8211	39	14362	BTA018090.1,BTA022980.1,BTA018355.1,BTA020890.1,BTA007016.1,BTA012257.4,BTA009855.1,BTA027848.1,BTA018438.1,BTA022324.1,BTA000549.1,BTA017774.1,BTA014798.1,BTA003577.1,BTA006928.1,BTA021906.3,BTA018285.1,BTA022288.1,BTA027042.1,BTA003300.1,BTA023899.1,BTA000490.1,BTA025709.1,BTA027797.1,BTA011434.1,BTA015064.1,BTA000425.1,BTA006137.1
GO:0004532	exoribonuclease activity	molecular_function	0.042973	1	13	8211	16	14362	BTA002872.1,BTA010317.1,BTA002494.1,BTA018787.1,BTA019154.1,BTA012602.1,BTA027809.1,BTA003560.1,BTA029211.1;support_id=CUFF119.368.1,BTA021671.1,BTA024003.1,BTA021589.1,BTA007170.1
GO:0016896	exoribonuclease activity, producing 5'-phosphomonoesters	molecular_function	0.042973	1	13	8211	16	14362	BTA021671.1,BTA029211.1;support_id=CUFF119.368.1,BTA003560.1,BTA027809.1,BTA007170.1,BTA024003.1,BTA021589.1,BTA018787.1,BTA002494.1,BTA019154.1,BTA012602.1,BTA002872.1,BTA010317.1
GO:0006779	porphyrin-containing compound biosynthetic process	biological_process	0.043218	1	40	8211	58	14362	BTA006928.1,BTA017774.1,BTA000549.1,BTA022324.1,BTA028572.1,BTA016540.1,BTA027948.1,BTA027848.1,BTA012257.4,BTA007016.1,BTA022980.1,BTA018355.1,BTA025620.1;support_id=CUFF105.400.2,BTA015064.1,BTA006137.1,BTA027797.1,BTA027968.1,BTA000490.1,BTA029372.1;support_id=CUFF120.236.3,BTA023899.1,BTA003300.1,BTA027323.1,BTA021906.3,BTA014798.1,BTA003577.1,BTA018438.1,BTA007292.1,BTA009855.1,BTA018685.1,B…
GO:0009056	catabolic process	biological_process	0.043224	1	253	8211	412	14362	BTA020149.1;support_id=CUFF84.42.3,BTA010190.1,BTA023269.1,BTA019147.1,BTA023646.1,BTA004526.1,BTA016233.1,BTA015600.1,BTA003864.1,BTA012257.4,BTA009211.1,BTA022249.1,BTA013666.1,BTA023664.1,BTA021341.1,BTA016633.1,BTA002430.1,BTA001523.1,BTA008158.1,BTA011559.1,BTA009567.2;support_id=CUFF41.222.1,BTA020758.1,BTA000214.1,BTA005527.1,BTA009477.1,BTA022361.1,BTA010749.1,BTA008319.1,BTA007192.1,BTA0…
GO:0033588	Elongator holoenzyme complex	cellular_component	0.046388	1	8	8211	9	14362	BTA002917.1,BTA018847.1,BTA015019.1,BTA005814.1,BTA004311.2,BTA002910.1,BTA002995.1,BTA002901.1
GO:0005216	ion channel activity	molecular_function	0.047581	1	294	8211	481	14362	BTA016354.1,BTA024681.3,BTA026268.1,BTA026272.1,BTA002099.1;support_id=CUFF9.55.1,BTA024055.1,BTA003961.1,BTA019363.1,BTA021562.2,BTA023869.1,BTA026274.1,BTA027466.1,BTA027704.2,BTA020183.1,BTA012628.1,BTA027657.1,BTA010664.1,BTA025946.1,BTA013787.1,BTA020190.1;support_id=CUFF84.148.2,BTA009245.3,BTA024756.1,BTA004728.1,BTA011646.1,BTA002966.1;support_id=CUFF12.527.1,BTA021637.1,BTA021195.1,BTA00…
GO:0022838	substrate-specific channel activity	molecular_function	0.047581	1	294	8211	481	14362	BTA010720.1;support_id=CUFF45.135.1,BTA025038.1,BTA008686.1,BTA002114.1,BTA021955.1;support_id=CUFF92.66.2,BTA012504.3,BTA003893.1,BTA001407.1,BTA020542.1,BTA018121.1,BTA009024.1,BTA020230.1,BTA013833.1,BTA015302.1,BTA006615.1,BTA004593.1,BTA008323.1,BTA016357.1,BTA017997.1;support_id=CUFF76.3.1,BTA005813.1,BTA003830.1,BTA019960.1,BTA017830.1,BTA014575.1,BTA025031.1,BTA001361.1,BTA017363.1,BTA024…
GO:0051056	regulation of small GTPase mediated signal transduction	biological_process	0.048428	1	40	8211	58	14362	BTA013672.1,BTA026025.1,BTA026070.1,BTA020360.1,BTA013087.1,BTA001736.1,BTA015686.1,BTA026048.1,BTA016853.1,BTA029000.1,BTA003650.1,BTA014281.1,BTA007929.1,BTA023624.2,BTA004334.3,BTA028620.1,BTA006176.1,BTA003837.1,BTA010904.2,BTA029495.1,BTA002691.1,BTA019934.1,BTA017901.1,BTA022666.2,BTA004630.1,BTA010379.1,BTA001940.1,BTA023501.1,BTA009293.1,BTA004295.1,BTA022079.1,BTA021082.1,BTA012552.1,BTA…
GO:0016881	acid-amino acid ligase activity	molecular_function	0.048882	1	24	8211	33	14362	BTA024257.1,BTA017244.1,BTA013757.1,BTA012654.1,BTA006661.1,BTA020534.1,BTA005145.1,BTA007023.1,BTA027238.1,BTA029596.1;support_id=CUFF121.449.1,BTA008028.1,BTA006898.1,BTA000545.1,BTA004857.1,BTA017578.1,BTA007192.1,BTA027853.1,BTA022077.1,BTA019858.1;support_id=CUFF83.17.1,BTA028973.1,BTA027754.1,BTA028311.1,BTA027163.1,BTA023405.1
GO:0000151	ubiquitin ligase complex	cellular_component	0.049146	1	33	8211	47	14362	BTA010351.1,BTA003398.2,BTA001364.1,BTA020534.1,BTA016722.1,BTA014097.1,BTA003076.1,BTA022487.1,BTA010818.1,BTA000361.1,BTA019162.1,BTA004307.1,BTA001870.1,BTA027410.1,BTA004291.1,BTA003403.1,BTA012316.2,BTA023133.1,BTA025600.1,BTA026146.1,BTA027512.1,BTA016024.1,BTA029334.1,BTA015231.1,BTA014775.1,BTA028518.1,BTA026299.1,BTA015980.1,BTA006927.1,BTA025849.1,BTA023810.1,BTA016422.1,BTA007192.1
GO:0072594	establishment of protein localization to organelle	biological_process	0.04984	1	75	8211	115	14362	BTA022767.1,BTA015602.2,BTA009216.1,BTA008667.1,BTA015059.1,BTA018973.1,BTA005624.1,BTA001603.1,BTA010670.1,BTA009536.1,BTA000678.1,BTA021341.1,BTA000563.1,BTA018812.1,BTA021471.1;support_id=CUFF89.562.1,BTA003223.3,BTA009211.1,BTA020055.1,BTA006078.1,BTA029466.1,BTA009528.1,BTA021666.1,BTA017784.1,BTA010340.1,BTA023925.1,BTA026136.1,BTA017043.1,BTA022967.1,BTA024009.1,BTA006565.1,BTA024732.1,BTA…
GO:0016634	oxidoreductase activity, acting on the CH-CH group of donors, oxygen as acceptor	molecular_function	0.05062	1	8	8211	9	14362	BTA023269.1,BTA003255.1,BTA000363.1,BTA016540.1,BTA006020.1,BTA001941.1,BTA027323.1,BTA025620.1;support_id=CUFF105.400.2
GO:0008033	tRNA processing	biological_process	0.050646	1	151	8211	241	14362	BTA019323.1,BTA004202.1,BTA023899.1,BTA025010.1,BTA023860.1;support_id=CUFF98.181.1,BTA008914.1,BTA027797.1,BTA004983.1,BTA020711.1,BTA023615.1,BTA013258.1,BTA024053.1,BTA010956.1,BTA024801.1;support_id=CUFF102.342.2,BTA016043.1,BTA010605.1,BTA012406.1,BTA024564.1,BTA009160.1,BTA013266.1,BTA020324.1,BTA001194.1,BTA004200.1,BTA018414.1,BTA022051.1,BTA001484.1,BTA003668.1,BTA007577.1,BTA018346.1,BT…
GO:0015075	ion transmembrane transporter activity	molecular_function	0.050655	1	586	8211	980	14362	BTA019548.1,BTA000499.1,BTA012811.1,BTA016002.1,BTA003917.1,BTA009077.1,BTA017354.1,BTA029327.1,BTA021462.1,BTA017169.1,BTA004620.1,BTA002121.1,BTA013830.1,BTA026803.1,BTA002517.1,BTA002543.1,BTA018905.1,BTA003273.1,BTA018414.1,BTA003269.4,BTA021661.1,BTA004581.1,BTA009784.1,BTA020339.1,BTA011358.1;support_id=CUFF48.12.4,BTA029195.1,BTA017894.1,BTA021869.1,BTA002083.1,BTA003200.1,BTA021637.1,BTA0…
GO:0098656	anion transmembrane transport	biological_process	0.050739	1	24	8211	33	14362	BTA023639.1,BTA012955.2,BTA000222.1,BTA003629.1,BTA002006.1,BTA004007.1,BTA017256.1,BTA004765.1,BTA014848.2,BTA019245.1,BTA028838.1,BTA021661.1,BTA026193.1,BTA018661.1,BTA028537.1,BTA009192.1,BTA019668.1,BTA021509.1,BTA006783.2,BTA023399.1,BTA023660.1,BTA014963.1,BTA010928.1,BTA018666.1
GO:0015293	symporter activity	molecular_function	0.051119	1	31	8211	44	14362	BTA006033.1,BTA029083.1,BTA029738.1,BTA023952.1,BTA029581.1,BTA016373.1,BTA004620.1,BTA002965.1,BTA030017.3,BTA011100.1,BTA023628.1,BTA029883.1,BTA027120.1,BTA006031.1,BTA023897.1,BTA012343.1,BTA029097.1,BTA001331.1;support_id=CUFF5.63.2,BTA027356.1,BTA005800.1,BTA025656.1,BTA029006.2,BTA029081.1,BTA023425.1,BTA029737.1,BTA017818.1,BTA003887.1,BTA002008.1;support_id=CUFF8.429.1,BTA025433.1,BTA026…
GO:0015294	solute:cation symporter activity	molecular_function	0.051119	1	31	8211	44	14362	BTA006033.1,BTA029083.1,BTA029738.1,BTA023952.1,BTA029581.1,BTA016373.1,BTA004620.1,BTA002965.1,BTA011100.1,BTA030017.3,BTA029883.1,BTA023628.1,BTA027120.1,BTA006031.1,BTA023897.1,BTA012343.1,BTA001331.1;support_id=CUFF5.63.2,BTA029097.1,BTA027356.1,BTA005800.1,BTA025656.1,BTA029006.2,BTA029081.1,BTA023425.1,BTA029737.1,BTA017818.1,BTA002008.1;support_id=CUFF8.429.1,BTA003887.1,BTA025433.1,BTA026…
GO:0015267	channel activity	molecular_function	0.051141	1	296	8211	485	14362	BTA005495.1,BTA015457.1,BTA006910.1,BTA004267.1,BTA000103.1,BTA020122.1,BTA002413.3,BTA029790.1,BTA009113.1,BTA024405.1,BTA014403.1,BTA006056.1;support_id=CUFF26.288.2,BTA009899.1,BTA007830.1,BTA016371.1,BTA007621.1;support_id=CUFF32.244.1,BTA011260.1;support_id=CUFF47.547.2,BTA010713.1,BTA025771.1,BTA007987.1,BTA018185.1,BTA009264.1,BTA010353.1,BTA009075.1,BTA020764.1,BTA013384.1,BTA008679.1,BTA…
GO:0022803	passive transmembrane transporter activity	molecular_function	0.051141	1	296	8211	485	14362	BTA026255.1,BTA021528.1,BTA005098.1,BTA024967.1,BTA016017.1,BTA001978.1,BTA003679.1,BTA020733.1,BTA015018.1,BTA024445.1;support_id=CUFF100.445.1,BTA029469.1;support_id=CUFF121.70.1,BTA022397.1,BTA013789.1,BTA024407.3,BTA009092.2,BTA018846.1,BTA003784.1;support_id=CUFF17.316.1,BTA009308.1,BTA000306.1,BTA015269.1,BTA023654.1,BTA013790.1,BTA015359.1,BTA029559.1,BTA025982.3,BTA021391.1,BTA016351.1,BT…
GO:0006269	DNA replication, synthesis of RNA primer	biological_process	0.051151	1	8	8211	9	14362	BTA000871.3,BTA018447.1,BTA024622.1,BTA021693.1,BTA012786.1,BTA002060.1,BTA014179.1,BTA010599.1
GO:0016796	exonuclease activity, active with either ribo- or deoxyribonucleic acids and producing 5'-phosphomonoesters	molecular_function	0.051475	1	46	8211	68	14362	BTA029091.1,BTA024483.1,BTA026228.1,BTA013748.1;support_id=CUFF57.390.1,BTA021671.1,BTA029211.1;support_id=CUFF119.368.1,BTA018130.1;support_id=CUFF76.210.4,BTA004718.1,BTA024401.1,BTA006078.1,BTA002481.1,BTA009321.1,BTA002256.1,BTA013410.1,BTA019206.1,BTA019494.1,BTA007192.1,BTA003560.1,BTA026442.1,BTA009135.1,BTA000266.1,BTA020702.2,BTA004032.1,BTA020534.1,BTA026851.1,BTA010658.1,BTA022487.1,BT…
GO:0007286	spermatid development	biological_process	0.051795	1	8	8211	9	14362	BTA026114.1;support_id=CUFF107.558.1,BTA014089.3,BTA001309.1,BTA003784.1;support_id=CUFF17.316.1,BTA023255.1,BTA012945.1,BTA029395.1,BTA014782.1;support_id=CUFF61.626.1
GO:0048515	spermatid differentiation	biological_process	0.051795	1	8	8211	9	14362	BTA014089.3,BTA026114.1;support_id=CUFF107.558.1,BTA012945.1,BTA023255.1,BTA003784.1;support_id=CUFF17.316.1,BTA001309.1,BTA029395.1,BTA014782.1;support_id=CUFF61.626.1
GO:0016832	aldehyde-lyase activity	molecular_function	0.051823	1	8	8211	9	14362	BTA027920.1,BTA025699.1,BTA019520.1,BTA027872.1,BTA023402.1,BTA017972.1,BTA019504.1,BTA023498.1
GO:0000165	MAPK cascade	biological_process	0.051948	1	8	8211	9	14362	BTA002944.1,BTA023731.1,BTA011625.1,BTA019417.1,BTA018619.1,BTA005964.1,BTA026859.1,BTA002147.1;support_id=CUFF9.207.1
GO:0023014	signal transduction by protein phosphorylation	biological_process	0.051948	1	8	8211	9	14362	BTA002944.1,BTA019417.1,BTA011625.1,BTA023731.1,BTA026859.1,BTA018619.1,BTA005964.1,BTA002147.1;support_id=CUFF9.207.1
GO:0043408	regulation of MAPK cascade	biological_process	0.051948	1	8	8211	9	14362	BTA002944.1,BTA019417.1,BTA023731.1,BTA011625.1,BTA005964.1,BTA018619.1,BTA026859.1,BTA002147.1;support_id=CUFF9.207.1
GO:0043410	positive regulation of MAPK cascade	biological_process	0.051948	1	8	8211	9	14362	BTA002944.1,BTA011625.1,BTA023731.1,BTA019417.1,BTA026859.1,BTA005964.1,BTA018619.1,BTA002147.1;support_id=CUFF9.207.1
GO:0007051	spindle organization	biological_process	0.051992	1	8	8211	9	14362	BTA021350.1,BTA019751.1,BTA008788.2,BTA019773.1,BTA020008.2,BTA011244.1,BTA006047.1,BTA030028.1
GO:0016811	hydrolase activity, acting on carbon-nitrogen (but not peptide) bonds, in linear amides	molecular_function	0.052259	1	22	8211	30	14362	BTA020275.1,BTA026270.1,BTA004819.1,BTA012001.1,BTA017512.1,BTA016313.1,BTA007675.1,BTA021710.1,BTA030203.5,BTA010522.1,BTA001373.2;support_id=CUFF5.172.1,BTA013031.1,BTA000026.1,BTA003307.1,BTA007616.1,BTA020218.1,BTA022361.1,BTA028059.1,BTA007679.1,BTA011748.1,BTA025616.1;support_id=CUFF105.393.1,BTA007674.1
GO:0060089	molecular transducer activity	molecular_function	0.052341	1	430	8211	713	14362	BTA021408.2,BTA006075.1,BTA015216.1,BTA000370.1,BTA004639.1,BTA008432.1,BTA013653.1,BTA002153.1,BTA027021.2,BTA014100.2,BTA019055.1,BTA018814.1,BTA013861.1,BTA023363.1,BTA026266.1,BTA004777.1,BTA002218.1,BTA022048.1,BTA014049.1,BTA007618.1,BTA011527.1,BTA029510.1,BTA020599.1,BTA013252.1,BTA023967.1,BTA017045.1,BTA011361.1,BTA013250.1,BTA014695.1,BTA012275.1,BTA017144.1,BTA019052.1,BTA009849.1,BTA…
GO:0006914	autophagy	biological_process	0.052797	1	68	8211	104	14362	BTA008318.1,BTA007615.1,BTA020008.2,BTA028129.1,BTA017918.1,BTA026451.1,BTA026579.1,BTA016782.1,BTA027244.1,BTA018577.1,BTA029079.1,BTA010751.1,BTA006125.1,BTA011067.1,BTA002407.1,BTA017244.1,BTA026063.1,BTA020899.2,BTA011241.1,BTA025516.1,BTA026299.1,BTA011443.1,BTA022920.1,BTA025041.1,BTA009135.1,BTA001326.1,BTA026237.1,BTA019923.1,BTA004762.1;support_id=CUFF21.387.1,BTA016168.1,BTA026838.1,BTA…
GO:0016480	negative regulation of transcription from RNA polymerase III promoter	biological_process	0.053163	1	5	8211	5	14362	BTA012663.1,BTA023791.1,BTA012767.1,BTA017571.1,BTA010997.1
GO:0042168	heme metabolic process	biological_process	0.053301	1	34	8211	49	14362	BTA003300.1,BTA006137.1,BTA015064.1,BTA027797.1,BTA000490.1,BTA027968.1,BTA029372.1;support_id=CUFF120.236.3,BTA023899.1,BTA012257.4,BTA007016.1,BTA022980.1,BTA018355.1,BTA006928.1,BTA017774.1,BTA000549.1,BTA022324.1,BTA028572.1,BTA027848.1,BTA027042.1,BTA022288.1,BTA018285.1,BTA023144.1,BTA011256.1,BTA000425.1,BTA011434.1,BTA025709.1,BTA018743.1,BTA020890.1,BTA018090.1,BTA021906.3,BTA003577.1,BT…
GO:0006820	anion transport	biological_process	0.055379	1	93	8211	145	14362	BTA014155.1,BTA006914.1,BTA011000.1,BTA025433.1,BTA021661.1,BTA007576.2,BTA003893.1,BTA029912.1,BTA002872.1,BTA011169.1,BTA026803.1,BTA018666.1,BTA010658.1,BTA003273.1,BTA015153.2,BTA021509.1,BTA019047.1,BTA003629.1,BTA002006.1,BTA016641.1,BTA017719.1,BTA011168.1,BTA002965.1,BTA028838.1,BTA006033.1,BTA026193.1,BTA018661.1,BTA014864.1,BTA023399.1,BTA025544.1,BTA017564.1,BTA007830.1,BTA023660.1,BTA…
GO:0016879	ligase activity, forming carbon-nitrogen bonds	molecular_function	0.05554	1	57	8211	86	14362	BTA025851.1,BTA021950.1;support_id=CUFF92.56.1,BTA007441.1,BTA014761.1,BTA009805.1,BTA023814.1,BTA028973.1,BTA027163.1,BTA004263.1,BTA010489.1,BTA022077.1,BTA000692.1,BTA021750.1,BTA007192.1,BTA027791.1,BTA022303.1,BTA017578.1,BTA001543.1,BTA001490.1,BTA011698.1,BTA004857.1,BTA024707.2,BTA010170.1,BTA008028.1,BTA029596.1;support_id=CUFF121.449.1,BTA005145.1,BTA000067.1,BTA001638.1,BTA012654.1,BTA…
GO:0005149	interleukin-1 receptor binding	molecular_function	0.056256	1	5	8211	5	14362	BTA028936.1,BTA001895.1,BTA006694.1,BTA017992.1;support_id=CUFF75.997.1,BTA004509.1
GO:0005815	microtubule organizing center	cellular_component	0.05688	1	20	8211	27	14362	BTA027576.1,BTA027034.1,BTA027542.1,BTA010292.1,BTA019446.2,BTA011285.1,BTA002262.1,BTA013283.1,BTA014118.1,BTA010479.1,BTA011643.1,BTA020008.2,BTA006047.1,BTA022093.1,BTA019074.1,BTA007215.1,BTA019868.1,BTA027513.1,BTA022530.1,BTA002340.1
GO:0050909	sensory perception of taste	biological_process	0.056888	1	18	8211	24	14362	BTA017554.2,BTA007633.1,BTA029629.1,BTA022442.1,BTA013709.1,BTA024498.1,BTA001598.1,BTA025669.1,BTA015292.1,BTA005332.1,BTA025681.1,BTA011081.1,BTA011738.1,BTA007472.1,BTA011083.1,BTA026223.1,BTA003088.3,BTA023783.1
GO:0001897	cytolysis by symbiont of host cells	biological_process	0.057025	1	10	8211	12	14362	BTA018368.1,BTA006023.1,BTA026809.1,BTA003441.1,BTA014915.1,BTA024835.2,BTA003359.1,BTA017481.1,BTA001721.1;support_id=CUFF6.298.1,BTA027640.1
GO:0001907	killing by symbiont of host cells	biological_process	0.057025	1	10	8211	12	14362	BTA024835.2,BTA003359.1,BTA014915.1,BTA001721.1;support_id=CUFF6.298.1,BTA017481.1,BTA027640.1,BTA018368.1,BTA026809.1,BTA003441.1,BTA006023.1
GO:0019836	hemolysis by symbiont of host erythrocytes	biological_process	0.057025	1	10	8211	12	14362	BTA003359.1,BTA024835.2,BTA014915.1,BTA027640.1,BTA017481.1,BTA001721.1;support_id=CUFF6.298.1,BTA026809.1,BTA003441.1,BTA006023.1,BTA018368.1
GO:0044004	disruption by symbiont of host cell	biological_process	0.057025	1	10	8211	12	14362	BTA006023.1,BTA026809.1,BTA003441.1,BTA018368.1,BTA014915.1,BTA024835.2,BTA003359.1,BTA027640.1,BTA001721.1;support_id=CUFF6.298.1,BTA017481.1
GO:0051801	cytolysis in other organism involved in symbiotic interaction	biological_process	0.057025	1	10	8211	12	14362	BTA018368.1,BTA006023.1,BTA003441.1,BTA026809.1,BTA001721.1;support_id=CUFF6.298.1,BTA017481.1,BTA027640.1,BTA014915.1,BTA024835.2,BTA003359.1
GO:0051818	disruption of cells of other organism involved in symbiotic interaction	biological_process	0.057025	1	10	8211	12	14362	BTA018368.1,BTA003441.1,BTA026809.1,BTA006023.1,BTA024835.2,BTA003359.1,BTA014915.1,BTA001721.1;support_id=CUFF6.298.1,BTA017481.1,BTA027640.1
GO:0051883	killing of cells in other organism involved in symbiotic interaction	biological_process	0.057025	1	10	8211	12	14362	BTA018368.1,BTA006023.1,BTA003441.1,BTA026809.1,BTA014915.1,BTA003359.1,BTA024835.2,BTA001721.1;support_id=CUFF6.298.1,BTA017481.1,BTA027640.1
GO:0052331	hemolysis in other organism involved in symbiotic interaction	biological_process	0.057025	1	10	8211	12	14362	BTA024835.2,BTA003359.1,BTA014915.1,BTA027640.1,BTA001721.1;support_id=CUFF6.298.1,BTA017481.1,BTA026809.1,BTA003441.1,BTA006023.1,BTA018368.1
GO:0008440	inositol-1,4,5-trisphosphate 3-kinase activity	molecular_function	0.057216	1	5	8211	5	14362	BTA025857.1,BTA013934.1,BTA002658.1,BTA007359.1,BTA007053.1
GO:0019220	regulation of phosphate metabolic process	biological_process	0.057292	1	18	8211	24	14362	BTA023731.1,BTA019417.1,BTA023873.1,BTA027118.1,BTA002108.1,BTA014842.1,BTA015558.1,BTA018619.1,BTA023874.1,BTA004779.1,BTA022297.1,BTA011625.1,BTA002944.1,BTA002147.1;support_id=CUFF9.207.1,BTA000111.1,BTA005964.1,BTA026859.1,BTA017803.1
GO:0051174	regulation of phosphorus metabolic process	biological_process	0.057292	1	18	8211	24	14362	BTA002944.1,BTA011625.1,BTA022297.1,BTA026859.1,BTA005964.1,BTA017803.1,BTA002147.1;support_id=CUFF9.207.1,BTA000111.1,BTA023873.1,BTA027118.1,BTA023731.1,BTA019417.1,BTA018619.1,BTA023874.1,BTA004779.1,BTA014842.1,BTA002108.1,BTA015558.1
GO:0051649	establishment of localization in cell	biological_process	0.057339	1	338	8211	558	14362	BTA004057.1,BTA007615.1,BTA028838.1,BTA029124.1,BTA009699.1;support_id=CUFF41.528.1,BTA023828.1,BTA021970.1,BTA016782.1,BTA013670.1,BTA020483.1,BTA026755.1,BTA016711.1,BTA003932.1,BTA010522.1,BTA009375.1,BTA007672.1,BTA022315.1,BTA000306.1,BTA000385.1,BTA020436.1,BTA003546.1,BTA018830.1,BTA013015.1,BTA023827.1,BTA017670.1,BTA027690.1,BTA010823.1;support_id=CUFF46.164.2,BTA030119.1,BTA018809.1,BTA…
GO:0016757	transferase activity, transferring glycosyl groups	molecular_function	0.05771	1	195	8211	316	14362	BTA009935.1,BTA011916.2,BTA026439.1,BTA002146.1,BTA003548.1,BTA011631.2,BTA019370.1,BTA030101.1,BTA019482.1,BTA025379.1,BTA014311.1,BTA013276.1,BTA030090.1,BTA006704.1,BTA025865.1,BTA008549.1,BTA010204.1,BTA002977.1,BTA027507.1,BTA013427.1,BTA017163.1,BTA029405.1;support_id=CUFF120.341.1,BTA009126.1,BTA001159.1,BTA021471.1;support_id=CUFF89.562.1,BTA018488.1,BTA021845.1,BTA002416.3,BTA029530.1,BT…
GO:0006040	amino sugar metabolic process	biological_process	0.058098	1	37	8211	54	14362	BTA003349.1,BTA030178.1,BTA021517.1,BTA005269.1,BTA020881.1,BTA022019.1,BTA016652.1,BTA017356.1,BTA012170.1,BTA014819.1,BTA018962.1,BTA015118.2,BTA002905.1,BTA002997.1,BTA002906.1,BTA016176.1,BTA028458.1,BTA002921.1,BTA011522.1,BTA012172.1,BTA007810.1,BTA014100.2,BTA014095.1,BTA014581.1,BTA011233.1,BTA028599.1;support_id=CUFF117.323.1,BTA026986.1,BTA014782.1;support_id=CUFF61.626.1,BTA001979.1,BT…
GO:0005923	bicellular tight junction	cellular_component	0.058922	1	5	8211	5	14362	BTA010121.1,BTA012456.1,BTA011932.1,BTA029603.1,BTA026280.1
GO:0043296	apical junction complex	cellular_component	0.058922	1	5	8211	5	14362	BTA011932.1,BTA012456.1,BTA010121.1,BTA026280.1,BTA029603.1
GO:0070160	occluding junction	cellular_component	0.058922	1	5	8211	5	14362	BTA026280.1,BTA029603.1,BTA012456.1,BTA011932.1,BTA010121.1
GO:0000786	nucleosome	cellular_component	0.059034	1	10	8211	12	14362	BTA003814.2,BTA028744.1;support_id=CUFF117.740.2,BTA000844.1,BTA021199.1,BTA005961.1,BTA026719.2,BTA001244.1,BTA002147.1;support_id=CUFF9.207.1,BTA014118.1,BTA023627.1;support_id=CUFF97.322.1
GO:0006739	NADP metabolic process	biological_process	0.059065	1	12	8211	15	14362	BTA000506.1,BTA006592.1,BTA020949.1,BTA003848.1;support_id=CUFF17.478.1,BTA001197.1,BTA025864.1,BTA023447.1,BTA012322.1,BTA008367.1,BTA010938.1,BTA020941.1,BTA001527.1
GO:0051640	organelle localization	biological_process	0.05922	1	10	8211	12	14362	BTA026859.1,BTA018619.1,BTA005964.1,BTA010456.1;support_id=CUFF44.141.1,BTA002147.1;support_id=CUFF9.207.1,BTA010521.1;support_id=CUFF44.309.1,BTA021476.1,BTA002944.1,BTA011625.1,BTA023731.1
GO:0019682	glyceraldehyde-3-phosphate metabolic process	biological_process	0.059379	1	5	8211	5	14362	BTA012322.1,BTA006592.1,BTA027969.1,BTA025864.1,BTA003848.1;support_id=CUFF17.478.1
GO:0051156	glucose 6-phosphate metabolic process	biological_process	0.059734	1	5	8211	5	14362	BTA012322.1,BTA006592.1,BTA010951.1,BTA003848.1;support_id=CUFF17.478.1,BTA025864.1
GO:0003887	DNA-directed DNA polymerase activity	molecular_function	0.05979	1	61	8211	93	14362	BTA004618.1,BTA019189.1,BTA000867.1;support_id=CUFF3.577.1,BTA019511.1,BTA000275.1,BTA020947.1;support_id=CUFF87.307.1,BTA025038.1,BTA026871.1,BTA029360.1,BTA012640.1,BTA017112.2,BTA019284.1,BTA020650.1,BTA023164.1;support_id=CUFF96.1.1,BTA016178.1,BTA024093.1,BTA020199.1;support_id=CUFF84.171.1,BTA020719.1;support_id=CUFF86.420.1,BTA013160.1,BTA019610.1;support_id=CUFF81.262.1,BTA029565.1,BTA006…
GO:0042325	regulation of phosphorylation	biological_process	0.06005	1	14	8211	18	14362	BTA002147.1;support_id=CUFF9.207.1,BTA002108.1,BTA000111.1,BTA014842.1,BTA015558.1,BTA005964.1,BTA018619.1,BTA026859.1,BTA004779.1,BTA023731.1,BTA011625.1,BTA019417.1,BTA002944.1,BTA027118.1
GO:0070972	protein localization to endoplasmic reticulum	biological_process	0.060211	1	37	8211	54	14362	BTA008029.1,BTA010524.1,BTA003223.3,BTA009563.1,BTA022312.1,BTA010453.1,BTA000359.1,BTA022227.1,BTA022315.1,BTA015059.1,BTA019408.1,BTA005252.1,BTA009697.1,BTA000563.1,BTA012410.1,BTA009536.1,BTA000678.1,BTA013015.1,BTA010320.1,BTA004651.1,BTA018316.1,BTA003232.1,BTA009310.1,BTA009375.1,BTA018414.1,BTA024292.2,BTA026136.1,BTA023925.1,BTA017043.1,BTA021666.1,BTA009528.1,BTA023828.1,BTA021970.1,BTA…
GO:0015995	chlorophyll biosynthetic process	biological_process	0.060221	1	5	8211	5	14362	BTA027948.1,BTA007292.1,BTA024706.1,BTA019657.1,BTA003085.1;support_id=CUFF13.76.1
GO:0006816	calcium ion transport	biological_process	0.060313	1	16	8211	21	14362	BTA019493.1;support_id=CUFF81.23.1,BTA023269.1;support_id=CUFF96.269.1,BTA012852.1,BTA002708.1,BTA024485.2,BTA029264.1,BTA019460.1,BTA010658.1,BTA001998.1,BTA022824.1,BTA014562.1,BTA029122.3,BTA028046.1,BTA027704.2,BTA000015.1,BTA001407.1
GO:0004040	amidase activity	molecular_function	0.060342	1	5	8211	5	14362	BTA004819.1,BTA025616.1;support_id=CUFF105.393.1,BTA021710.1,BTA020218.1,BTA030203.5
GO:0007606	sensory perception of chemical stimulus	biological_process	0.060512	1	30	8211	43	14362	BTA017554.2,BTA010390.1,BTA024333.3,BTA007633.1,BTA029629.1,BTA022442.1,BTA013709.1,BTA007715.1,BTA001598.1,BTA024498.1,BTA024331.1,BTA011569.1,BTA025669.1,BTA020191.1,BTA005332.1,BTA015292.1,BTA012181.1,BTA025681.1,BTA006057.1,BTA011081.1,BTA011738.1,BTA007472.1,BTA008684.1,BTA011083.1,BTA000058.1,BTA019844.1,BTA026223.1,BTA003088.3,BTA023783.1,BTA024330.1
GO:0044212	transcription regulatory region DNA binding	molecular_function	0.060734	1	5	8211	5	14362	BTA026799.3;support_id=CUFF109.705.3,BTA027409.1,BTA027243.1,BTA005916.1,BTA019499.1
GO:0006400	tRNA modification	biological_process	0.061312	1	83	8211	129	14362	BTA013266.1,BTA023828.1,BTA021970.1,BTA024710.1,BTA019428.2,BTA019624.1,BTA000523.1,BTA001194.1,BTA019161.2,BTA004200.1,BTA018414.1,BTA007577.1,BTA024460.1,BTA003668.1,BTA024051.1,BTA018820.1,BTA017005.1,BTA026695.3,BTA018676.1,BTA026019.1,BTA018316.1,BTA004202.1,BTA019323.1,BTA012566.1,BTA027936.1,BTA001192.1,BTA023860.1;support_id=CUFF98.181.1,BTA025010.1,BTA004983.1,BTA030058.1,BTA023615.1,BTA…
GO:0004871	signal transducer activity	molecular_function	0.061364	1	366	8211	606	14362	BTA022040.1,BTA014694.1,BTA016432.1,BTA022220.1,BTA012943.1,BTA021404.1,BTA028371.1,BTA002117.1,BTA004710.1,BTA012447.1,BTA018521.2,BTA005703.1,BTA026269.1,BTA002084.1,BTA030120.1,BTA021548.3,BTA009558.1,BTA020947.1;support_id=CUFF87.307.1,BTA021817.2,BTA018754.1,BTA013064.1,BTA007715.1,BTA013709.1,BTA024333.3,BTA005937.1,BTA015456.1,BTA022072.1,BTA013542.1,BTA011184.1,BTA020719.1;support_id=CUFF…
GO:0008527	taste receptor activity	molecular_function	0.061893	1	5	8211	5	14362	BTA011081.1,BTA011738.1,BTA025681.1,BTA011083.1,BTA025669.1
GO:0009593	detection of chemical stimulus	biological_process	0.061893	1	5	8211	5	14362	BTA011738.1,BTA011081.1,BTA025681.1,BTA025669.1,BTA011083.1
GO:0050906	detection of stimulus involved in sensory perception	biological_process	0.061893	1	5	8211	5	14362	BTA025669.1,BTA011083.1,BTA025681.1,BTA011081.1,BTA011738.1
GO:0050907	detection of chemical stimulus involved in sensory perception	biological_process	0.061893	1	5	8211	5	14362	BTA011081.1,BTA011738.1,BTA025669.1,BTA011083.1,BTA025681.1
GO:0050912	detection of chemical stimulus involved in sensory perception of taste	biological_process	0.061893	1	5	8211	5	14362	BTA025681.1,BTA025669.1,BTA011083.1,BTA011738.1,BTA011081.1
GO:1902582	single-organism intracellular transport	biological_process	0.061943	1	178	8211	288	14362	BTA024636.1,BTA009557.1,BTA026067.1,BTA016246.1,BTA012508.1,BTA001377.1,BTA002749.1,BTA022213.1,BTA019441.1,BTA026579.1,BTA022409.1,BTA011591.1,BTA008635.1,BTA021971.1,BTA010456.1;support_id=CUFF44.141.1,BTA016227.1,BTA011881.1,BTA016708.1,BTA017507.1,BTA004620.1;support_id=CUFF20.433.2,BTA028186.3,BTA018414.1,BTA006914.1,BTA029464.1,BTA022227.1,BTA019408.1,BTA024289.1,BTA019232.1,BTA023054.1,BTA…
GO:0008218	bioluminescence	biological_process	0.062623	1	5	8211	5	14362	BTA004923.1,BTA018776.1,BTA018691.1,BTA017248.1,BTA027871.1
GO:0019062	virion attachment to host cell	biological_process	0.062825	1	5	8211	5	14362	BTA020209.1,BTA000767.2,BTA007644.1,BTA023383.1,BTA016721.2;support_id=CUFF71.849.1
GO:0044406	adhesion of symbiont to host	biological_process	0.062825	1	5	8211	5	14362	BTA020209.1,BTA023383.1,BTA007644.1,BTA016721.2;support_id=CUFF71.849.1,BTA000767.2
GO:0044650	adhesion of symbiont to host cell	biological_process	0.062825	1	5	8211	5	14362	BTA000767.2,BTA007644.1,BTA023383.1,BTA016721.2;support_id=CUFF71.849.1,BTA020209.1
GO:0030261	chromosome condensation	biological_process	0.063111	1	16	8211	21	14362	BTA008562.1,BTA026715.1,BTA022409.1,BTA020719.1;support_id=CUFF86.420.1,BTA026905.1,BTA030195.1,BTA014578.1,BTA008033.1,BTA010878.1,BTA017043.1,BTA009375.1,BTA017360.1,BTA009932.1,BTA003929.1,BTA003232.1,BTA003223.3
GO:0072524	pyridine-containing compound metabolic process	biological_process	0.063241	1	40	8211	59	14362	BTA001197.1,BTA028277.1,BTA020661.1,BTA006592.1,BTA024733.1,BTA022589.4,BTA022326.1,BTA010951.1,BTA023447.1,BTA012322.1,BTA013295.1,BTA004841.1,BTA013293.1,BTA007219.2,BTA010938.1,BTA018111.1,BTA018000.1,BTA022217.1,BTA008367.1,BTA030010.1,BTA020438.1,BTA007899.1,BTA000506.1,BTA004831.1,BTA023498.1,BTA001527.1,BTA027927.1,BTA001602.1,BTA020949.1,BTA003848.1;support_id=CUFF17.478.1,BTA025864.1,BTA…
GO:0015718	monocarboxylic acid transport	biological_process	0.063249	1	5	8211	5	14362	BTA003068.1;support_id=CUFF13.29.1,BTA000460.1,BTA011186.2,BTA014155.1,BTA010928.1
GO:0030076	light-harvesting complex	cellular_component	0.063414	1	14	8211	18	14362	BTA002519.1,BTA027678.1,BTA028770.1,BTA010277.1,BTA006067.1;support_id=CUFF26.309.1,BTA020358.1,BTA019206.1,BTA028848.1;support_id=CUFF118.317.2,BTA017172.1,BTA019785.1;support_id=CUFF82.119.2,BTA001431.1,BTA022800.3;support_id=CUFF94.499.1,BTA022020.1,BTA000577.1
GO:0003997	acyl-CoA oxidase activity	molecular_function	0.063414	1	5	8211	5	14362	BTA001941.1,BTA006020.1,BTA023269.1,BTA003255.1,BTA000363.1
GO:0006635	fatty acid beta-oxidation	biological_process	0.063414	1	5	8211	5	14362	BTA001941.1,BTA006020.1,BTA023269.1,BTA003255.1,BTA000363.1
GO:0009062	fatty acid catabolic process	biological_process	0.063414	1	5	8211	5	14362	BTA000363.1,BTA003255.1,BTA023269.1,BTA006020.1,BTA001941.1
GO:0019395	fatty acid oxidation	biological_process	0.063414	1	5	8211	5	14362	BTA000363.1,BTA003255.1,BTA006020.1,BTA001941.1,BTA023269.1
GO:0034440	lipid oxidation	biological_process	0.063414	1	5	8211	5	14362	BTA000363.1,BTA023269.1,BTA006020.1,BTA001941.1,BTA003255.1
GO:0044242	cellular lipid catabolic process	biological_process	0.063414	1	5	8211	5	14362	BTA003255.1,BTA001941.1,BTA006020.1,BTA023269.1,BTA000363.1
GO:0005086	ARF guanyl-nucleotide exchange factor activity	molecular_function	0.06356	1	5	8211	5	14362	BTA007929.1,BTA002691.1,BTA003650.1,BTA028620.1,BTA017901.1
GO:0032011	ARF protein signal transduction	biological_process	0.06356	1	5	8211	5	14362	BTA003650.1,BTA028620.1,BTA017901.1,BTA007929.1,BTA002691.1
GO:0032012	regulation of ARF protein signal transduction	biological_process	0.06356	1	5	8211	5	14362	BTA003650.1,BTA028620.1,BTA017901.1,BTA002691.1,BTA007929.1
GO:0016192	vesicle-mediated transport	biological_process	0.064586	1	160	8211	258	14362	BTA020851.1,BTA007524.1,BTA019985.1,BTA018814.1,BTA017784.1,BTA005229.1,BTA028523.1,BTA000946.1,BTA022967.1,BTA020852.2,BTA014793.3,BTA017120.1;support_id=CUFF73.385.1,BTA008317.1,BTA029394.1,BTA029596.1,BTA014110.1,BTA000404.1,BTA010834.1,BTA000766.1,BTA003670.1,BTA023238.1,BTA005950.1,BTA009661.1,BTA027837.1,BTA020952.3,BTA025770.1,BTA018896.1,BTA001615.1,BTA015602.2,BTA009864.1,BTA011438.1,BTA…
GO:0022836	gated channel activity	molecular_function	0.065373	1	234	8211	382	14362	BTA003917.1,BTA003830.1,BTA016002.1,BTA017640.1,BTA020124.1,BTA001164.1,BTA001361.1,BTA019548.1,BTA020067.1,BTA017830.1,BTA009991.1,BTA029327.1,BTA024564.1,BTA020765.3,BTA026273.1,BTA021681.1,BTA016401.1,BTA012079.1,BTA009077.1,BTA024087.1,BTA013830.1,BTA001616.1,BTA003916.1,BTA002121.1,BTA015675.1,BTA017169.1,BTA002394.1,BTA021560.1,BTA029145.1,BTA023930.1,BTA013223.1,BTA025038.1,BTA010720.1;sup…
GO:1903825	organic acid transmembrane transport	biological_process	0.066091	1	23	8211	32	14362	BTA017256.1,BTA004007.1,BTA014848.2,BTA004765.1,BTA019245.1,BTA028838.1,BTA023639.1,BTA000222.1,BTA002006.1,BTA003629.1,BTA009192.1,BTA006783.2,BTA021509.1,BTA019668.1,BTA023660.1,BTA023399.1,BTA018666.1,BTA010928.1,BTA014963.1,BTA021661.1,BTA018661.1,BTA028537.1,BTA026193.1
GO:0035091	phosphatidylinositol binding	molecular_function	0.067173	1	21	8211	29	14362	BTA024468.1;support_id=CUFF100.497.1,BTA000370.1,BTA015397.1,BTA013522.1,BTA007900.1,BTA029043.1,BTA024289.1,BTA010594.1,BTA000035.1,BTA002287.1,BTA027398.1,BTA007200.1,BTA026182.1,BTA002970.1,BTA017045.1,BTA029273.1,BTA000395.1,BTA022663.1,BTA028719.1,BTA005731.1,BTA027350.1
GO:0015276	ligand-gated ion channel activity	molecular_function	0.067748	1	206	8211	335	14362	BTA026255.1,BTA006056.1;support_id=CUFF26.288.2,BTA009899.1,BTA024405.1,BTA005098.1,BTA007621.1;support_id=CUFF32.244.1,BTA024967.1,BTA011260.1;support_id=CUFF47.547.2,BTA016017.1,BTA003679.1,BTA001978.1,BTA020733.1,BTA015018.1,BTA002413.3,BTA029790.1,BTA015457.1,BTA013789.1,BTA022397.1,BTA004267.1,BTA000103.1,BTA006910.1,BTA018846.1,BTA024407.3,BTA020122.1,BTA009092.2,BTA003784.1;support_id=CUFF…
GO:0022834	ligand-gated channel activity	molecular_function	0.067748	1	206	8211	335	14362	BTA027657.1,BTA012628.1,BTA020183.1,BTA027704.2,BTA001160.1,BTA029510.1,BTA007618.1,BTA020190.1;support_id=CUFF84.148.2,BTA013787.1,BTA011361.1,BTA003789.1,BTA026274.1,BTA027466.1,BTA024055.1,BTA020082.1,BTA002153.1,BTA023869.1,BTA008432.1,BTA004639.1,BTA021562.2,BTA013653.1,BTA019363.1,BTA013861.1,BTA026268.1,BTA024681.3,BTA016354.1,BTA026266.1,BTA002099.1;support_id=CUFF9.55.1,BTA000415.1,BTA02…
GO:0055085	transmembrane transport	biological_process	0.068102	1	530	8211	888	14362	BTA004057.1,BTA020788.1,BTA028838.1,BTA026238.1,BTA002708.1,BTA018357.1,BTA003629.1,BTA028304.1,BTA010658.1,BTA018666.1,BTA002513.1,BTA014809.1,BTA001304.1,BTA000311.1,BTA004882.1,BTA015065.1,BTA004765.1,BTA025671.1,BTA021819.1,BTA024806.1,BTA015359.1,BTA024394.1,BTA018710.1,BTA001188.2,BTA000846.1,BTA021717.1,BTA014058.1,BTA016720.1,BTA016017.1,BTA024967.1,BTA000395.1,BTA027531.1,BTA020350.1,BTA…
GO:0009451	RNA modification	biological_process	0.068612	1	117	8211	186	14362	BTA007974.3,BTA000209.1,BTA025624.1,BTA010576.3,BTA000460.1,BTA011186.2,BTA023866.1,BTA024570.1,BTA024292.2,BTA005506.1,BTA018370.1,BTA014876.1,BTA018410.1,BTA015656.2,BTA014293.1,BTA009528.1,BTA001332.1,BTA000207.1,BTA016830.1,BTA000038.1,BTA026860.2,BTA012895.1,BTA000628.1,BTA022507.1,BTA011800.1,BTA009818.1,BTA024732.1,BTA007197.1,BTA005197.1;support_id=CUFF22.573.2,BTA020912.1,BTA004988.1,BTA…
GO:0003777	microtubule motor activity	molecular_function	0.068826	1	23	8211	32	14362	BTA007524.1,BTA015243.1,BTA027329.2,BTA022475.1,BTA020575.1,BTA020358.1,BTA024401.1,BTA027845.1,BTA027728.2,BTA015482.1,BTA000813.1,BTA006365.1,BTA019199.1,BTA029075.1,BTA020569.1,BTA014567.1,BTA008177.1,BTA012935.1,BTA017886.1,BTA029091.1,BTA030205.1,BTA019459.1,BTA001159.1
GO:0055114	oxidation-reduction process	biological_process	0.068897	1	764	8211	1290	14362	BTA013488.1,BTA010496.1,BTA010389.1,BTA014583.1,BTA003255.1,BTA012802.1,BTA016265.1,BTA027146.1;support_id=CUFF111.646.1,BTA014840.1,BTA006062.1;support_id=CUFF26.303.1,BTA000114.1,BTA026928.1,BTA029929.1,BTA027842.1,BTA022284.1,BTA019496.1,BTA024929.1,BTA020902.1,BTA005557.1,BTA016530.1,BTA024519.3,BTA028572.1,BTA010478.2,BTA007430.1,BTA006753.1,BTA014305.1,BTA007016.1,BTA019201.1;support_id=CUF…
GO:0050662	coenzyme binding	molecular_function	0.068971	1	266	8211	438	14362	BTA024923.1,BTA008356.1,BTA017211.1,BTA024695.1,BTA023739.1,BTA028083.1,BTA026118.1,BTA007014.1,BTA003937.1,BTA000425.1,BTA007835.1,BTA011556.1,BTA003577.1,BTA029686.1;support_id=CUFF121.720.1,BTA023680.1,BTA027626.1,BTA007011.1,BTA021514.1,BTA003307.1,BTA007838.1,BTA021857.1,BTA027880.1,BTA018339.1,BTA015064.1,BTA019308.1,BTA007301.1,BTA018717.1,BTA003556.1,BTA003357.1,BTA024947.1,BTA020295.1,BT…
GO:0005774	vacuolar membrane	cellular_component	0.069614	1	21	8211	29	14362	BTA029770.1,BTA001188.2,BTA005419.2,BTA029078.1,BTA024822.1,BTA020272.1,BTA004057.1,BTA014720.1,BTA024806.1,BTA022767.1,BTA024047.1,BTA015367.1,BTA023291.1,BTA008317.1,BTA011431.1,BTA028693.3,BTA024873.1,BTA006777.1,BTA011737.1,BTA013524.1,BTA004762.1;support_id=CUFF21.387.1
GO:0044437	vacuolar part	cellular_component	0.069614	1	21	8211	29	14362	BTA006777.1,BTA024873.1,BTA011737.1,BTA015367.1,BTA023291.1,BTA008317.1,BTA011431.1,BTA028693.3,BTA004762.1;support_id=CUFF21.387.1,BTA013524.1,BTA029078.1,BTA024822.1,BTA020272.1,BTA029770.1,BTA001188.2,BTA005419.2,BTA024806.1,BTA024047.1,BTA022767.1,BTA004057.1,BTA014720.1
GO:0005085	guanyl-nucleotide exchange factor activity	molecular_function	0.072118	1	43	8211	64	14362	BTA002930.1,BTA025888.1,BTA010379.1,BTA001699.2,BTA017901.1,BTA022666.2,BTA004630.1,BTA021762.1,BTA009293.1,BTA022079.1,BTA021082.1,BTA012552.1,BTA001940.1,BTA022532.1,BTA009866.1,BTA007965.1,BTA004687.1,BTA002602.1,BTA026049.1,BTA021388.1,BTA004676.1,BTA026025.1,BTA013672.1,BTA013087.1,BTA001736.1,BTA015686.1,BTA026048.1,BTA016853.1,BTA026070.1,BTA016770.1,BTA007929.1,BTA015943.1,BTA023624.2,BTA…
GO:0003774	motor activity	molecular_function	0.072202	1	51	8211	77	14362	BTA010606.2,BTA020575.1,BTA007672.1,BTA020358.1,BTA025041.1,BTA009661.1,BTA024032.1,BTA004142.1,BTA009536.1,BTA015243.1,BTA012566.1,BTA023814.1,BTA005958.1,BTA021341.1,BTA026021.1,BTA013206.1,BTA024483.1,BTA030205.1,BTA029091.1,BTA019459.1,BTA001159.1,BTA024401.1,BTA027845.1,BTA016314.2,BTA022538.1,BTA015482.1,BTA007677.1,BTA009528.1,BTA029119.1;support_id=CUFF119.94.1,BTA021400.1,BTA007524.1,BTA…
GO:0008509	anion transmembrane transporter activity	molecular_function	0.073462	1	68	8211	105	14362	BTA006914.1,BTA025433.1,BTA021661.1,BTA029912.1,BTA007576.2,BTA026803.1,BTA011169.1,BTA018666.1,BTA010658.1,BTA003273.1,BTA021509.1,BTA015153.2,BTA003629.1,BTA002006.1,BTA019047.1,BTA016641.1,BTA002965.1,BTA011168.1,BTA028838.1,BTA006033.1,BTA018661.1,BTA026193.1,BTA014864.1,BTA007830.1,BTA023660.1,BTA017564.1,BTA023399.1,BTA009093.1;support_id=CUFF39.71.1,BTA019668.1,BTA010679.1,BTA023639.1,BTA0…
GO:0070887	cellular response to chemical stimulus	biological_process	0.074369	1	44	8211	66	14362	BTA029602.1,BTA017116.1,BTA009023.1;support_id=CUFF38.344.2,BTA025517.1,BTA006478.2,BTA003432.1,BTA021471.1;support_id=CUFF89.562.1,BTA005964.1,BTA017724.1,BTA005893.1,BTA004683.1,BTA012979.1,BTA001149.1,BTA012783.1,BTA010850.1,BTA028775.1,BTA023731.1,BTA011156.1,BTA017741.1,BTA014618.1,BTA000214.1,BTA026677.3;support_id=CUFF109.340.1,BTA000849.1,BTA007440.1,BTA026280.1,BTA010658.1,BTA002147.1;su…
GO:0015370	solute:sodium symporter activity	molecular_function	0.075637	1	26	8211	37	14362	BTA025433.1,BTA002008.1;support_id=CUFF8.429.1,BTA017818.1,BTA029737.1,BTA018534.1,BTA026613.1,BTA029006.2,BTA025656.1,BTA005800.1,BTA027356.1,BTA023425.1,BTA029081.1,BTA006031.1,BTA027120.1,BTA023628.1,BTA029883.1,BTA030017.3,BTA011100.1,BTA001331.1;support_id=CUFF5.63.2,BTA023897.1,BTA023952.1,BTA029738.1,BTA006033.1,BTA002965.1,BTA004620.1,BTA016373.1
GO:0009095	aromatic amino acid family biosynthetic process, prephenate pathway	biological_process	0.076552	1	7	8211	8	14362	BTA018333.1,BTA020199.1;support_id=CUFF84.171.1,BTA018285.1,BTA005546.1,BTA007577.1;support_id=CUFF32.152.1,BTA020786.1,BTA006067.1;support_id=CUFF26.309.1
GO:0007018	microtubule-based movement	biological_process	0.076595	1	26	8211	37	14362	BTA021376.1,BTA024401.1,BTA027728.2,BTA015482.1,BTA027845.1,BTA000813.1,BTA006365.1,BTA019199.1,BTA012935.1,BTA020569.1,BTA029075.1,BTA022433.1,BTA008177.1,BTA014567.1,BTA017886.1,BTA030205.1,BTA019459.1,BTA029091.1,BTA001159.1,BTA015243.1,BTA007524.1,BTA022475.1,BTA027329.2,BTA020999.2,BTA020575.1,BTA020358.1
GO:0000152	nuclear ubiquitin ligase complex	cellular_component	0.076966	1	31	8211	45	14362	BTA025849.1,BTA006927.1,BTA019162.1,BTA015980.1,BTA026299.1,BTA000361.1,BTA028518.1,BTA010818.1,BTA014775.1,BTA027410.1,BTA001870.1,BTA007192.1,BTA016422.1,BTA004307.1,BTA023810.1,BTA027512.1,BTA026146.1,BTA025600.1,BTA012316.2,BTA023133.1,BTA003403.1,BTA004291.1,BTA003076.1,BTA022487.1,BTA015231.1,BTA016722.1,BTA014097.1,BTA020534.1,BTA001364.1,BTA003398.2,BTA029334.1
GO:0005680	anaphase-promoting complex	cellular_component	0.076966	1	31	8211	45	14362	BTA023810.1,BTA004307.1,BTA016422.1,BTA007192.1,BTA001870.1,BTA027410.1,BTA014775.1,BTA028518.1,BTA010818.1,BTA000361.1,BTA026299.1,BTA019162.1,BTA006927.1,BTA015980.1,BTA025849.1,BTA029334.1,BTA003398.2,BTA001364.1,BTA020534.1,BTA014097.1,BTA016722.1,BTA015231.1,BTA022487.1,BTA003076.1,BTA004291.1,BTA003403.1,BTA023133.1,BTA012316.2,BTA025600.1,BTA026146.1,BTA027512.1
GO:0031461	cullin-RING ubiquitin ligase complex	cellular_component	0.076966	1	31	8211	45	14362	BTA019162.1,BTA015980.1,BTA006927.1,BTA025849.1,BTA000361.1,BTA026299.1,BTA014775.1,BTA028518.1,BTA010818.1,BTA027410.1,BTA001870.1,BTA007192.1,BTA023810.1,BTA004307.1,BTA016422.1,BTA027512.1,BTA026146.1,BTA023133.1,BTA012316.2,BTA025600.1,BTA003403.1,BTA004291.1,BTA014097.1,BTA016722.1,BTA022487.1,BTA003076.1,BTA015231.1,BTA020534.1,BTA001364.1,BTA029334.1,BTA003398.2
GO:0003684	damaged DNA binding	molecular_function	0.077213	1	17	8211	23	14362	BTA010606.2,BTA029876.1,BTA017740.1,BTA028895.1,BTA029871.1,BTA000265.1,BTA016848.2;support_id=CUFF72.270.1,BTA006611.1,BTA024032.1,BTA020758.1,BTA029066.1,BTA028711.1,BTA008191.1;support_id=CUFF34.631.1,BTA029272.1,BTA017725.1,BTA010343.2,BTA004291.1
GO:0015988	energy coupled proton transmembrane transport, against electrochemical gradient	biological_process	0.077509	1	53	8211	81	14362	BTA008026.1,BTA013524.1,BTA010658.1,BTA011737.1,BTA006777.1,BTA010932.1,BTA027033.1,BTA007225.2,BTA011431.1,BTA008317.1,BTA000474.1,BTA015367.1,BTA014720.1,BTA026441.1,BTA025211.1,BTA004057.1,BTA007524.1,BTA029078.1,BTA018475.1,BTA019276.1,BTA029770.1,BTA013711.1,BTA019503.1,BTA004775.1,BTA028127.1,BTA024967.1,BTA012992.1,BTA024873.1,BTA018679.1,BTA012506.1,BTA018494.1,BTA009208.1,BTA004718.1,BTA…
GO:0015991	ATP hydrolysis coupled proton transport	biological_process	0.077509	1	53	8211	81	14362	BTA026441.1,BTA025211.1,BTA014720.1,BTA004057.1,BTA029078.1,BTA007524.1,BTA013711.1,BTA029770.1,BTA019503.1,BTA018475.1,BTA019276.1,BTA008026.1,BTA010658.1,BTA013524.1,BTA007225.2,BTA027033.1,BTA010932.1,BTA011737.1,BTA006777.1,BTA015367.1,BTA000474.1,BTA008317.1,BTA011431.1,BTA024806.1,BTA021977.2,BTA024047.1,BTA012553.1,BTA022767.1,BTA012129.1,BTA002481.1,BTA025671.1,BTA024822.1,BTA004068.1;sup…
GO:0019900	kinase binding	molecular_function	0.077892	1	15	8211	20	14362	BTA026237.1,BTA013767.1,BTA004494.1,BTA014842.1,BTA003076.1,BTA002108.1,BTA026289.1,BTA027525.1,BTA016168.1,BTA008128.1,BTA027841.1,BTA026182.1,BTA004716.1,BTA021174.1,BTA027118.1
GO:0019901	protein kinase binding	molecular_function	0.077892	1	15	8211	20	14362	BTA021174.1,BTA027118.1,BTA004716.1,BTA026182.1,BTA027841.1,BTA008128.1,BTA016168.1,BTA027525.1,BTA026289.1,BTA002108.1,BTA003076.1,BTA014842.1,BTA026237.1,BTA004494.1,BTA013767.1
GO:0008061	chitin binding	molecular_function	0.077951	1	34	8211	50	14362	BTA016176.1,BTA028458.1,BTA002921.1,BTA020214.2,BTA011522.1,BTA012172.1,BTA014100.2,BTA007810.1,BTA012170.1,BTA015118.2,BTA002905.1,BTA002997.1,BTA002906.1,BTA017356.1,BTA003349.1,BTA030178.1,BTA021517.1,BTA013786.1,BTA020881.1,BTA022019.1,BTA016652.1,BTA002919.1,BTA001285.1,BTA023063.2,BTA002908.1,BTA002903.1,BTA004142.1,BTA014782.1;support_id=CUFF61.626.1,BTA001979.1,BTA015110.1,BTA014095.1,BTA…
GO:0019203	carbohydrate phosphatase activity	molecular_function	0.078421	1	7	8211	8	14362	BTA023266.1,BTA000343.1,BTA010487.1,BTA023769.1,BTA007659.1,BTA023611.1,BTA022684.1
GO:0050308	sugar-phosphatase activity	molecular_function	0.078421	1	7	8211	8	14362	BTA023266.1,BTA000343.1,BTA010487.1,BTA023769.1,BTA007659.1,BTA023611.1,BTA022684.1
GO:0016805	dipeptidase activity	molecular_function	0.079049	1	7	8211	8	14362	BTA020471.1,BTA004865.1,BTA010885.1,BTA006464.1,BTA026401.1,BTA004882.1,BTA021609.1
GO:0044087	regulation of cellular component biogenesis	biological_process	0.079058	1	24	8211	34	14362	BTA004909.1,BTA021474.1,BTA012679.1,BTA010292.1,BTA029531.1,BTA009746.2,BTA029737.1,BTA011072.1,BTA029084.1,BTA011285.1,BTA013283.1,BTA011643.1,BTA005963.1;support_id=CUFF26.1.1,BTA010479.1,BTA028476.1,BTA027151.1,BTA019868.1,BTA022977.1,BTA029098.1,BTA007215.1,BTA003196.1,BTA002340.1,BTA024785.1;support_id=CUFF102.306.1,BTA011796.1
GO:0051641	cellular localization	biological_process	0.079478	1	366	8211	609	14362	BTA024003.1,BTA010256.1,BTA024292.2,BTA029394.1,BTA008317.1,BTA002843.1,BTA014047.1,BTA006940.1,BTA016638.1,BTA014730.1,BTA003232.1,BTA009424.1,BTA024257.1,BTA010834.1,BTA017110.1,BTA009929.1,BTA007524.1,BTA019985.1,BTA006565.1,BTA028946.1,BTA029397.1;support_id=CUFF120.301.1,BTA024732.1,BTA001521.1,BTA011360.1,BTA009528.1,BTA017043.1,BTA022967.1,BTA005515.1,BTA000946.1,BTA028523.1,BTA030040.1,BT…
GO:0005773	vacuole	cellular_component	0.079528	1	24	8211	34	14362	BTA024806.1,BTA022767.1,BTA024047.1,BTA014720.1,BTA004057.1,BTA029078.1,BTA024822.1,BTA020272.1,BTA018529.1,BTA029770.1,BTA001188.2,BTA005419.2,BTA004762.1;support_id=CUFF21.387.1,BTA018509.1,BTA013524.1,BTA025333.1,BTA024873.1,BTA006777.1,BTA011737.1,BTA015367.1,BTA023291.1,BTA011431.1,BTA008317.1,BTA028693.3
GO:0000975	regulatory region DNA binding	molecular_function	0.079565	1	7	8211	8	14362	BTA014579.1;support_id=CUFF61.71.2,BTA005916.1,BTA019499.1,BTA027409.1,BTA026799.3;support_id=CUFF109.705.3,BTA023488.1,BTA027243.1
GO:0001067	regulatory region nucleic acid binding	molecular_function	0.079565	1	7	8211	8	14362	BTA005916.1,BTA014579.1;support_id=CUFF61.71.2,BTA019499.1,BTA027409.1,BTA026799.3;support_id=CUFF109.705.3,BTA027243.1,BTA023488.1
GO:0030203	glycosaminoglycan metabolic process	biological_process	0.081209	1	24	8211	34	14362	BTA005269.1,BTA027608.1,BTA015840.1,BTA019076.1,BTA021787.1,BTA004819.1,BTA001745.1,BTA023664.1,BTA026859.1,BTA021555.1,BTA023089.1,BTA023731.1,BTA028059.1,BTA019173.1,BTA022361.1,BTA017215.1,BTA020426.1,BTA029705.1,BTA016396.1,BTA022339.1,BTA000319.1,BTA018619.1,BTA022300.1,BTA013031.1
GO:0030170	pyridoxal phosphate binding	molecular_function	0.081692	1	70	8211	109	14362	BTA014715.1,BTA024568.1,BTA027260.1,BTA017821.1,BTA029254.1,BTA019164.1,BTA018317.1,BTA013965.2,BTA022386.1,BTA003582.1,BTA018806.1,BTA016343.1,BTA008322.1,BTA014802.1,BTA023316.1,BTA023651.1,BTA007376.1,BTA019649.1,BTA020550.1,BTA029915.1,BTA019188.1,BTA021806.1,BTA016280.1,BTA026174.1,BTA021814.1,BTA004871.1,BTA023585.1,BTA028591.1,BTA028294.1,BTA001606.1,BTA007374.1,BTA023619.1,BTA026974.1,BTA…
GO:0003008	system process	biological_process	0.081731	1	37	8211	55	14362	BTA025681.1,BTA005332.1,BTA012181.1,BTA025669.1,BTA008684.1,BTA019844.1,BTA000058.1,BTA011083.1,BTA016060.1;support_id=CUFF69.88.2,BTA010390.1,BTA029602.1,BTA029534.1,BTA009197.1;support_id=CUFF39.334.1,BTA022442.1,BTA029629.1,BTA012825.1,BTA006057.1,BTA020191.1,BTA015292.1,BTA007472.1,BTA011738.1,BTA011081.1,BTA030103.1;support_id=CUFF124.257.1,BTA023783.1,BTA024330.1,BTA020339.1,BTA003088.3,BTA…
GO:0051606	detection of stimulus	biological_process	0.081772	1	7	8211	8	14362	BTA025669.1,BTA011083.1,BTA025681.1,BTA019206.1,BTA011081.1,BTA011738.1,BTA029930.1
GO:0016011	dystroglycan complex	cellular_component	0.081939	1	9	8211	11	14362	BTA021718.1,BTA005234.2,BTA022278.1,BTA019041.1,BTA002318.1,BTA017353.1,BTA010860.1,BTA027714.1,BTA002314.1
GO:0016012	sarcoglycan complex	cellular_component	0.081939	1	9	8211	11	14362	BTA002318.1,BTA017353.1,BTA010860.1,BTA019041.1,BTA022278.1,BTA002314.1,BTA027714.1,BTA005234.2,BTA021718.1
GO:0001919	regulation of receptor recycling	biological_process	0.083526	1	7	8211	8	14362	BTA002944.1,BTA026859.1,BTA005964.1,BTA018619.1,BTA011625.1,BTA002147.1;support_id=CUFF9.207.1,BTA023731.1
GO:0007040	lysosome organization	biological_process	0.083526	1	7	8211	8	14362	BTA026859.1,BTA002944.1,BTA018619.1,BTA005964.1,BTA011625.1,BTA023731.1,BTA002147.1;support_id=CUFF9.207.1
GO:0032008	positive regulation of TOR signaling	biological_process	0.083526	1	7	8211	8	14362	BTA023731.1,BTA002147.1;support_id=CUFF9.207.1,BTA011625.1,BTA018619.1,BTA005964.1,BTA002944.1,BTA026859.1
GO:0032439	endosome localization	biological_process	0.083526	1	7	8211	8	14362	BTA018619.1,BTA005964.1,BTA026859.1,BTA002944.1,BTA002147.1;support_id=CUFF9.207.1,BTA023731.1,BTA011625.1
GO:0042632	cholesterol homeostasis	biological_process	0.083526	1	7	8211	8	14362	BTA002147.1;support_id=CUFF9.207.1,BTA023731.1,BTA011625.1,BTA005964.1,BTA018619.1,BTA026859.1,BTA002944.1
GO:0043200	response to amino acid	biological_process	0.083526	1	7	8211	8	14362	BTA002944.1,BTA026859.1,BTA005964.1,BTA018619.1,BTA011625.1,BTA023731.1,BTA002147.1;support_id=CUFF9.207.1
GO:0055088	lipid homeostasis	biological_process	0.083526	1	7	8211	8	14362	BTA011625.1,BTA002147.1;support_id=CUFF9.207.1,BTA023731.1,BTA026859.1,BTA002944.1,BTA018619.1,BTA005964.1
GO:0055092	sterol homeostasis	biological_process	0.083526	1	7	8211	8	14362	BTA005964.1,BTA018619.1,BTA026859.1,BTA002944.1,BTA023731.1,BTA002147.1;support_id=CUFF9.207.1,BTA011625.1
GO:0071229	cellular response to acid chemical	biological_process	0.083526	1	7	8211	8	14362	BTA002147.1;support_id=CUFF9.207.1,BTA023731.1,BTA011625.1,BTA018619.1,BTA005964.1,BTA026859.1,BTA002944.1
GO:0071230	cellular response to amino acid stimulus	biological_process	0.083526	1	7	8211	8	14362	BTA023731.1,BTA002147.1;support_id=CUFF9.207.1,BTA011625.1,BTA005964.1,BTA018619.1,BTA026859.1,BTA002944.1
GO:0071417	cellular response to organonitrogen compound	biological_process	0.083526	1	7	8211	8	14362	BTA011625.1,BTA002147.1;support_id=CUFF9.207.1,BTA023731.1,BTA026859.1,BTA002944.1,BTA005964.1,BTA018619.1
GO:0080171	lytic vacuole organization	biological_process	0.083526	1	7	8211	8	14362	BTA002147.1;support_id=CUFF9.207.1,BTA023731.1,BTA011625.1,BTA005964.1,BTA018619.1,BTA026859.1,BTA002944.1
GO:1901699	cellular response to nitrogen compound	biological_process	0.083526	1	7	8211	8	14362	BTA002147.1;support_id=CUFF9.207.1,BTA023731.1,BTA011625.1,BTA005964.1,BTA018619.1,BTA002944.1,BTA026859.1
GO:1901701	cellular response to oxygen-containing compound	biological_process	0.083526	1	7	8211	8	14362	BTA011625.1,BTA023731.1,BTA002147.1;support_id=CUFF9.207.1,BTA002944.1,BTA026859.1,BTA005964.1,BTA018619.1
GO:0007289	spermatid nucleus differentiation	biological_process	0.083526	1	7	8211	8	14362	BTA026114.1;support_id=CUFF107.558.1,BTA014782.1;support_id=CUFF61.626.1,BTA029395.1,BTA014089.3,BTA003784.1;support_id=CUFF17.316.1,BTA023255.1,BTA012945.1
GO:0035092	sperm chromatin condensation	biological_process	0.083526	1	7	8211	8	14362	BTA003784.1;support_id=CUFF17.316.1,BTA023255.1,BTA012945.1,BTA026114.1;support_id=CUFF107.558.1,BTA029395.1,BTA014089.3,BTA014782.1;support_id=CUFF61.626.1
GO:0004112	cyclic-nucleotide phosphodiesterase activity	molecular_function	0.084055	1	15	8211	20	14362	BTA029534.1,BTA021994.1,BTA026614.1,BTA021189.1,BTA022196.1,BTA005121.2;support_id=CUFF22.375.1,BTA021303.1,BTA025528.1,BTA016175.1,BTA005175.1,BTA029401.1,BTA022733.3,BTA020339.1,BTA017077.1,BTA028372.1
GO:0005326	neurotransmitter transporter activity	molecular_function	0.084286	1	15	8211	20	14362	BTA016373.1,BTA004620.1,BTA029081.1,BTA025656.1,BTA029006.2,BTA027356.1,BTA005800.1,BTA001331.1;support_id=CUFF5.63.2,BTA018534.1,BTA023897.1,BTA026613.1,BTA027120.1,BTA030017.3,BTA017818.1,BTA002008.1;support_id=CUFF8.429.1
GO:0005328	neurotransmitter:sodium symporter activity	molecular_function	0.084286	1	15	8211	20	14362	BTA027356.1,BTA005800.1,BTA025656.1,BTA029006.2,BTA016373.1,BTA029081.1,BTA004620.1,BTA030017.3,BTA002008.1;support_id=CUFF8.429.1,BTA017818.1,BTA027120.1,BTA023897.1,BTA026613.1,BTA001331.1;support_id=CUFF5.63.2,BTA018534.1
GO:0007266	Rho protein signal transduction	biological_process	0.084627	1	29	8211	42	14362	BTA014281.1,BTA007965.1,BTA029000.1,BTA004687.1,BTA004334.3,BTA009866.1,BTA023624.2,BTA004676.1,BTA003837.1,BTA006176.1,BTA010904.2,BTA026049.1,BTA029495.1,BTA004630.1,BTA022666.2,BTA013672.1,BTA010379.1,BTA026025.1,BTA001940.1,BTA026070.1,BTA026048.1,BTA022079.1,BTA016853.1,BTA021082.1,BTA012552.1,BTA009293.1,BTA001736.1,BTA013087.1,BTA015686.1
GO:0035023	regulation of Rho protein signal transduction	biological_process	0.084627	1	29	8211	42	14362	BTA026070.1,BTA001940.1,BTA001736.1,BTA009293.1,BTA013087.1,BTA015686.1,BTA016853.1,BTA026048.1,BTA022079.1,BTA012552.1,BTA021082.1,BTA013672.1,BTA004630.1,BTA022666.2,BTA026025.1,BTA010379.1,BTA004676.1,BTA003837.1,BTA006176.1,BTA010904.2,BTA026049.1,BTA029495.1,BTA007965.1,BTA029000.1,BTA004687.1,BTA014281.1,BTA009866.1,BTA023624.2,BTA004334.3
GO:0003333	amino acid transmembrane transport	biological_process	0.085328	1	22	8211	31	14362	BTA019245.1,BTA028838.1,BTA017256.1,BTA004007.1,BTA004765.1,BTA014848.2,BTA003629.1,BTA002006.1,BTA023639.1,BTA000222.1,BTA023399.1,BTA023660.1,BTA014963.1,BTA018666.1,BTA009192.1,BTA021509.1,BTA019668.1,BTA006783.2,BTA026193.1,BTA018661.1,BTA028537.1,BTA021661.1
GO:0009144	purine nucleoside triphosphate metabolic process	biological_process	0.086947	1	80	8211	126	14362	BTA011581.1,BTA013968.1,BTA007848.1,BTA027927.1,BTA023498.1,BTA001527.1,BTA018679.1,BTA026401.1,BTA014855.1,BTA025566.1,BTA008838.1,BTA018303.1,BTA003842.1;support_id=CUFF17.464.1,BTA010679.1,BTA001571.2,BTA013295.1,BTA010951.1,BTA022589.4,BTA027033.1,BTA002013.1,BTA023625.3,BTA004882.1,BTA020955.1,BTA020155.1,BTA026055.1,BTA018000.1,BTA004581.1,BTA018111.1,BTA010938.1,BTA009264.1,BTA021703.1,BTA…
GO:0009199	ribonucleoside triphosphate metabolic process	biological_process	0.086947	1	80	8211	126	14362	BTA023625.3,BTA002013.1,BTA027033.1,BTA020955.1,BTA004882.1,BTA010951.1,BTA013295.1,BTA022589.4,BTA011358.1;support_id=CUFF48.12.4,BTA021703.1,BTA019450.1,BTA008540.1,BTA030038.1,BTA011193.1,BTA009531.1,BTA004841.1,BTA013293.1,BTA002736.1,BTA004581.1,BTA018000.1,BTA026055.1,BTA020155.1,BTA009264.1,BTA018111.1,BTA010938.1,BTA026401.1,BTA018679.1,BTA025566.1,BTA014855.1,BTA007848.1,BTA013968.1,BTA0…
GO:0009205	purine ribonucleoside triphosphate metabolic process	biological_process	0.086947	1	80	8211	126	14362	BTA028178.1,BTA018445.1,BTA029569.1,BTA006464.1,BTA000518.1,BTA011219.1,BTA018016.1,BTA027970.1,BTA020575.1,BTA005669.2,BTA020438.1,BTA018494.1,BTA002304.1,BTA005254.1,BTA013611.1,BTA000827.1,BTA030010.1,BTA004526.1,BTA009445.1,BTA016180.1,BTA030198.1,BTA016664.1,BTA019460.1,BTA006772.1,BTA001602.1,BTA018678.1,BTA017353.1,BTA019276.1,BTA018319.1,BTA013656.1,BTA007709.1,BTA020035.1,BTA013064.1,BTA…
GO:0051726	regulation of cell cycle	biological_process	0.090985	1	38	8211	57	14362	BTA008353.1,BTA027828.1,BTA002428.1,BTA022487.1,BTA001705.2,BTA027912.1,BTA020425.1,BTA015556.1,BTA025651.1,BTA008987.1,BTA017872.1,BTA007461.1,BTA024598.1,BTA022977.1,BTA015555.1,BTA029361.1,BTA001369.1,BTA016532.1,BTA006966.1,BTA019993.1,BTA012657.1,BTA012316.2,BTA026146.1,BTA030010.1,BTA021075.1,BTA025250.1,BTA023810.1,BTA019751.1,BTA020099.1,BTA016336.1,BTA014842.1,BTA002108.1,BTA008132.1,BTA…
GO:0022892	substrate-specific transporter activity	molecular_function	0.091274	1	639	8211	1079	14362	BTA025982.3,BTA026254.1,BTA003886.2;support_id=CUFF17.585.1,BTA007223.1,BTA000768.1,BTA009655.1,BTA011193.1,BTA016365.1,BTA027545.1,BTA020008.2,BTA009106.1,BTA020155.1,BTA009627.1,BTA002965.1,BTA021528.1,BTA026255.1,BTA015018.1,BTA020733.1,BTA003679.1,BTA023660.1,BTA001978.1,BTA009298.1,BTA024407.3,BTA009092.2,BTA015453.1,BTA022397.1,BTA013789.1,BTA010679.1,BTA004068.1;support_id=CUFF18.493.1,BTA…
GO:0005215	transporter activity	molecular_function	0.091422	1	923	8211	1568	14362	BTA007621.1;support_id=CUFF32.244.1,BTA009086.1,BTA000215.1,BTA005597.1;support_id=CUFF24.472.4,BTA009899.1,BTA001489.1,BTA028943.1,BTA023291.1,BTA006056.1;support_id=CUFF26.288.2,BTA014403.1,BTA024405.1,BTA012467.2,BTA023697.1,BTA026193.1,BTA010478.2,BTA013777.1,BTA029083.1,BTA011388.1,BTA009883.1,BTA003973.1;support_id=CUFF18.271.1,BTA028040.1;support_id=CUFF115.8.1,BTA029375.1,BTA002413.3,BTA0…
GO:0009141	nucleoside triphosphate metabolic process	biological_process	0.091636	1	81	8211	128	14362	BTA026401.1,BTA018679.1,BTA025566.1,BTA014855.1,BTA013968.1,BTA007848.1,BTA011581.1,BTA001527.1,BTA023498.1,BTA027927.1,BTA001571.2,BTA010679.1,BTA003842.1;support_id=CUFF17.464.1,BTA018303.1,BTA008838.1,BTA023625.3,BTA002013.1,BTA027033.1,BTA020955.1,BTA004882.1,BTA010951.1,BTA013295.1,BTA022589.4,BTA011358.1;support_id=CUFF48.12.4,BTA021703.1,BTA008540.1,BTA019450.1,BTA009531.1,BTA030038.1,BTA0…
GO:0034061	DNA polymerase activity	molecular_function	0.092057	1	69	8211	108	14362	BTA016278.1,BTA027579.1,BTA019341.1;support_id=CUFF80.322.1,BTA015751.1;support_id=CUFF67.35.1,BTA006772.1,BTA010209.1,BTA014903.1,BTA009423.1,BTA020454.1;support_id=CUFF85.301.1,BTA024867.1,BTA030085.1;support_id=CUFF124.220.1,BTA000338.4,BTA023361.1,BTA013456.1;support_id=CUFF56.326.1,BTA000214.1,BTA025003.1,BTA000399.1,BTA024130.1,BTA000497.1,BTA019284.1,BTA026871.1,BTA020947.1;support_id=CUFF…
GO:0008146	sulfotransferase activity	molecular_function	0.094533	1	23	8211	33	14362	BTA019236.1,BTA029582.2,BTA014776.1,BTA023025.1,BTA029001.1,BTA014311.1,BTA019279.1,BTA028374.1,BTA007557.1,BTA013491.2,BTA009110.1,BTA003850.1,BTA028373.1,BTA022940.1,BTA020979.1,BTA003402.1,BTA020978.1,BTA007882.1,BTA027707.1,BTA021632.1;support_id=CUFF90.161.1,BTA000336.1,BTA012783.1,BTA024914.1
GO:0046907	intracellular transport	biological_process	0.094713	1	304	8211	505	14362	BTA003068.1;support_id=CUFF13.29.1,BTA010521.1;support_id=CUFF44.309.1,BTA024826.3,BTA029182.1,BTA027059.1,BTA023291.1,BTA015443.1,BTA024334.1,BTA022916.1,BTA007518.1,BTA024646.1;support_id=CUFF102.1.1,BTA028039.1,BTA007004.1,BTA009697.1,BTA028775.1,BTA026295.2,BTA022920.1,BTA028040.1;support_id=CUFF115.8.1,BTA020122.1,BTA023521.1,BTA011689.1,BTA018316.1,BTA020534.1,BTA030118.1,BTA003582.1,BTA010…
GO:0003697	single-stranded DNA binding	molecular_function	0.095655	1	16	8211	22	14362	BTA001364.1,BTA002910.1,BTA002995.1,BTA019084.1,BTA003343.1,BTA023919.1,BTA016527.1,BTA027288.1,BTA015759.1,BTA002901.1,BTA007891.1,BTA023806.1,BTA023292.1,BTA013426.1,BTA002917.1,BTA028770.1
GO:0033647	host intracellular organelle	cellular_component	0.095964	1	25	8211	36	14362	BTA019195.2,BTA014720.1,BTA016485.1;support_id=CUFF71.200.1,BTA019191.1,BTA026927.1,BTA005969.2;support_id=CUFF26.24.1,BTA022070.1,BTA001940.1,BTA024445.1;support_id=CUFF100.445.1,BTA023292.1,BTA002989.1,BTA026114.1;support_id=CUFF107.558.1,BTA019193.1,BTA021422.2,BTA002577.1,BTA024560.1,BTA017886.1,BTA015123.1;support_id=CUFF62.581.1,BTA012679.1,BTA020771.1,BTA013836.1,BTA012855.1,BTA011881.1,BT…
GO:0033648	host intracellular membrane-bounded organelle	cellular_component	0.095964	1	25	8211	36	14362	BTA011881.1,BTA012855.1,BTA013836.1,BTA026503.1,BTA016527.1,BTA015123.1;support_id=CUFF62.581.1,BTA012679.1,BTA020771.1,BTA021422.2,BTA002577.1,BTA017886.1,BTA024560.1,BTA002989.1,BTA023292.1,BTA024445.1;support_id=CUFF100.445.1,BTA001940.1,BTA026114.1;support_id=CUFF107.558.1,BTA019193.1,BTA014720.1,BTA016485.1;support_id=CUFF71.200.1,BTA019195.2,BTA022070.1,BTA019191.1,BTA005969.2;support_id=CU…
GO:0042025	host cell nucleus	cellular_component	0.095964	1	25	8211	36	14362	BTA020771.1,BTA012679.1,BTA015123.1;support_id=CUFF62.581.1,BTA024560.1,BTA017886.1,BTA002577.1,BTA021422.2,BTA011881.1,BTA012855.1,BTA013836.1,BTA026503.1,BTA016527.1,BTA016485.1;support_id=CUFF71.200.1,BTA014720.1,BTA019195.2,BTA022070.1,BTA026927.1,BTA005969.2;support_id=CUFF26.24.1,BTA019191.1,BTA002989.1,BTA023292.1,BTA024445.1;support_id=CUFF100.445.1,BTA001940.1,BTA019193.1,BTA026114.1;sup…
GO:0005088	Ras guanyl-nucleotide exchange factor activity	molecular_function	0.097705	1	30	8211	44	14362	BTA010379.1,BTA026025.1,BTA021762.1,BTA022666.2,BTA004630.1,BTA013672.1,BTA012552.1,BTA021082.1,BTA016853.1,BTA026048.1,BTA022079.1,BTA015686.1,BTA013087.1,BTA001736.1,BTA009293.1,BTA026070.1,BTA001940.1,BTA004334.3,BTA023624.2,BTA009866.1,BTA014281.1,BTA029000.1,BTA007965.1,BTA004687.1,BTA029495.1,BTA010904.2,BTA026049.1,BTA003837.1,BTA004676.1,BTA006176.1
GO:0005089	Rho guanyl-nucleotide exchange factor activity	molecular_function	0.097705	1	30	8211	44	14362	BTA004687.1,BTA029000.1,BTA007965.1,BTA014281.1,BTA009866.1,BTA023624.2,BTA004334.3,BTA003837.1,BTA006176.1,BTA004676.1,BTA026049.1,BTA010904.2,BTA029495.1,BTA013672.1,BTA004630.1,BTA022666.2,BTA021762.1,BTA026025.1,BTA010379.1,BTA001940.1,BTA026070.1,BTA009293.1,BTA001736.1,BTA013087.1,BTA015686.1,BTA026048.1,BTA016853.1,BTA022079.1,BTA021082.1,BTA012552.1
GO:0016482	cytoplasmic transport	biological_process	0.097753	1	109	8211	175	14362	BTA014778.1,BTA009211.1,BTA003223.3,BTA020219.1,BTA021471.1;support_id=CUFF89.562.1,BTA017518.1,BTA018812.1,BTA029466.1,BTA020055.1,BTA006078.1,BTA018973.1,BTA005624.1,BTA001603.1,BTA015059.1,BTA003400.1,BTA010670.1,BTA022767.1,BTA008667.1,BTA015602.2,BTA009216.1,BTA021341.1,BTA000563.1,BTA009536.1,BTA000678.1,BTA007279.1,BTA005950.1,BTA005418.1,BTA003232.1,BTA025695.1,BTA010834.1,BTA022528.1,BTA…
GO:0044764	multi-organism cellular process	biological_process	0.098459	1	215	8211	354	14362	BTA020207.1,BTA028836.1,BTA020154.1,BTA021341.1,BTA019157.1,BTA021393.1,BTA015059.1,BTA006636.1,BTA016233.1,BTA000541.1,BTA028451.1,BTA019159.1,BTA004526.1,BTA017191.1,BTA016194.1,BTA000079.1,BTA022249.1,BTA021917.1,BTA021038.2,BTA004159.1,BTA020719.1;support_id=CUFF86.420.1,BTA016721.2;support_id=CUFF71.849.1,BTA013788.1,BTA020199.1;support_id=CUFF84.171.1,BTA020043.1,BTA027857.1,BTA006836.1,BTA…
GO:0004615	phosphomannomutase activity	molecular_function	0.098544	1	4	8211	4	14362	BTA026738.1,BTA009704.1,BTA008055.1,BTA023898.1
GO:0009226	nucleotide-sugar biosynthetic process	biological_process	0.098544	1	4	8211	4	14362	BTA023898.1,BTA009704.1,BTA008055.1,BTA026738.1
GO:0009298	GDP-mannose biosynthetic process	biological_process	0.098544	1	4	8211	4	14362	BTA008055.1,BTA009704.1,BTA023898.1,BTA026738.1
GO:0019673	GDP-mannose metabolic process	biological_process	0.098544	1	4	8211	4	14362	BTA023898.1,BTA008055.1,BTA009704.1,BTA026738.1
GO:0010035	response to inorganic substance	biological_process	0.099216	1	16	8211	22	14362	BTA024915.1,BTA006289.1,BTA003409.1,BTA015108.1,BTA027505.1,BTA009554.1;support_id=CUFF41.186.1,BTA006879.1,BTA003390.1,BTA016012.1,BTA016631.1,BTA000719.1,BTA027802.1,BTA010283.1,BTA000306.1,BTA027435.1,BTA027389.1
GO:0004489	methylenetetrahydrofolate reductase (NAD(P)H) activity	molecular_function	0.10026	1	4	8211	4	14362	BTA026200.1,BTA022235.1,BTA021922.1,BTA009165.1
GO:0007340	acrosome reaction	biological_process	0.1012	1	4	8211	4	14362	BTA029918.1,BTA011571.1,BTA025375.1,BTA012946.1;support_id=CUFF54.424.1
GO:0007342	fusion of sperm to egg plasma membrane	biological_process	0.1012	1	4	8211	4	14362	BTA012946.1;support_id=CUFF54.424.1,BTA025375.1,BTA029918.1,BTA011571.1
GO:0017156	calcium ion-dependent exocytosis	biological_process	0.1012	1	4	8211	4	14362	BTA029918.1,BTA011571.1,BTA025375.1,BTA012946.1;support_id=CUFF54.424.1
GO:0045026	plasma membrane fusion	biological_process	0.1012	1	4	8211	4	14362	BTA012946.1;support_id=CUFF54.424.1,BTA025375.1,BTA029918.1,BTA011571.1
GO:0006558	L-phenylalanine metabolic process	biological_process	0.10167	1	4	8211	4	14362	BTA007577.1;support_id=CUFF32.152.1,BTA020786.1,BTA005546.1,BTA010671.1
GO:1902221	erythrose 4-phosphate/phosphoenolpyruvate family amino acid metabolic process	biological_process	0.10167	1	4	8211	4	14362	BTA010671.1,BTA005546.1,BTA020786.1,BTA007577.1;support_id=CUFF32.152.1
GO:0009415	response to water	biological_process	0.10252	1	4	8211	4	14362	BTA006289.1,BTA000719.1,BTA027435.1,BTA016631.1
GO:0005905	coated pit	cellular_component	0.10287	1	4	8211	4	14362	BTA024826.3,BTA011438.1,BTA022916.1,BTA000946.1
GO:0012510	trans-Golgi network transport vesicle membrane	cellular_component	0.10287	1	4	8211	4	14362	BTA022916.1,BTA024826.3,BTA011438.1,BTA000946.1
GO:0030125	clathrin vesicle coat	cellular_component	0.10287	1	4	8211	4	14362	BTA000946.1,BTA022916.1,BTA011438.1,BTA024826.3
GO:0030130	clathrin coat of trans-Golgi network vesicle	cellular_component	0.10287	1	4	8211	4	14362	BTA000946.1,BTA022916.1,BTA011438.1,BTA024826.3
GO:0030132	clathrin coat of coated pit	cellular_component	0.10287	1	4	8211	4	14362	BTA000946.1,BTA011438.1,BTA024826.3,BTA022916.1
GO:0030136	clathrin-coated vesicle	cellular_component	0.10287	1	4	8211	4	14362	BTA000946.1,BTA022916.1,BTA024826.3,BTA011438.1
GO:0030140	trans-Golgi network transport vesicle	cellular_component	0.10287	1	4	8211	4	14362	BTA000946.1,BTA022916.1,BTA011438.1,BTA024826.3
GO:0030665	clathrin-coated vesicle membrane	cellular_component	0.10287	1	4	8211	4	14362	BTA000946.1,BTA022916.1,BTA024826.3,BTA011438.1
GO:0006783	heme biosynthetic process	biological_process	0.103	1	31	8211	46	14362	BTA023899.1,BTA029372.1;support_id=CUFF120.236.3,BTA027968.1,BTA000490.1,BTA025709.1,BTA027797.1,BTA011434.1,BTA006137.1,BTA000425.1,BTA015064.1,BTA022288.1,BTA018285.1,BTA027042.1,BTA003300.1,BTA027848.1,BTA009855.1,BTA028572.1,BTA018438.1,BTA022324.1,BTA000549.1,BTA017774.1,BTA014798.1,BTA003577.1,BTA006928.1,BTA021906.3,BTA018090.1,BTA018355.1,BTA022980.1,BTA007016.1,BTA020890.1,BTA012257.4
GO:0016874	ligase activity	molecular_function	0.10325	1	166	8211	271	14362	BTA022303.1,BTA001490.1,BTA029178.1,BTA022077.1,BTA004877.1,BTA027163.1,BTA023814.1,BTA000656.1,BTA014761.1,BTA005492.1,BTA022980.1,BTA000067.1,BTA017254.1,BTA019923.1,BTA006415.1,BTA015361.1,BTA011698.1,BTA011512.1,BTA015763.1,BTA019858.1;support_id=CUFF83.17.1,BTA005550.1,BTA010368.1,BTA018029.1,BTA005585.1,BTA022316.1,BTA011699.1,BTA011421.1,BTA018772.1,BTA014495.1,BTA025235.1,BTA001863.2,BTA0…
GO:0008290	F-actin capping protein complex	cellular_component	0.10338	1	4	8211	4	14362	BTA027151.1,BTA029098.1,BTA011796.1,BTA029084.1
GO:0005912	adherens junction	cellular_component	0.10495	1	4	8211	4	14362	BTA015196.2,BTA013352.1,BTA000443.2,BTA013211.3
GO:0005924	cell-substrate adherens junction	cellular_component	0.10495	1	4	8211	4	14362	BTA000443.2,BTA013352.1,BTA015196.2,BTA013211.3
GO:0005925	focal adhesion	cellular_component	0.10495	1	4	8211	4	14362	BTA013352.1,BTA015196.2,BTA000443.2,BTA013211.3
GO:0030055	cell-substrate junction	cellular_component	0.10495	1	4	8211	4	14362	BTA000443.2,BTA013352.1,BTA015196.2,BTA013211.3
GO:0070161	anchoring junction	cellular_component	0.10495	1	4	8211	4	14362	BTA015196.2,BTA013352.1,BTA000443.2,BTA013211.3
GO:0016042	lipid catabolic process	biological_process	0.10531	1	26	8211	38	14362	BTA001993.1,BTA018809.1,BTA029434.1;support_id=CUFF120.416.1,BTA002988.4,BTA006020.1,BTA026225.1,BTA019814.1,BTA001601.1,BTA023646.1,BTA003255.1,BTA022639.1,BTA010195.2,BTA000365.1,BTA001319.1,BTA023269.1,BTA017143.1,BTA009477.1,BTA020136.1,BTA001941.1,BTA018758.1,BTA019716.1,BTA000363.1,BTA028305.1,BTA011559.1,BTA005535.1,BTA001467.1
GO:0006098	pentose-phosphate shunt	biological_process	0.1056	1	4	8211	4	14362	BTA012322.1,BTA006592.1,BTA025864.1,BTA003848.1;support_id=CUFF17.478.1
GO:0001816	cytokine production	biological_process	0.10662	1	4	8211	4	14362	BTA028038.1,BTA007657.1,BTA020825.2,BTA004767.1
GO:0001817	regulation of cytokine production	biological_process	0.10662	1	4	8211	4	14362	BTA028038.1,BTA007657.1,BTA020825.2,BTA004767.1
GO:0001819	positive regulation of cytokine production	biological_process	0.10662	1	4	8211	4	14362	BTA020825.2,BTA007657.1,BTA004767.1,BTA028038.1
GO:0046034	ATP metabolic process	biological_process	0.10741	1	77	8211	122	14362	BTA017353.1,BTA018678.1,BTA019276.1,BTA018319.1,BTA013656.1,BTA007709.1,BTA020035.1,BTA013064.1,BTA009447.1,BTA017267.1,BTA012427.1,BTA012322.1,BTA024733.1,BTA021534.2;support_id=CUFF89.776.2,BTA024634.1,BTA029569.1,BTA018445.1,BTA000518.1,BTA006464.1,BTA011219.1,BTA028178.1,BTA018016.1,BTA020575.1,BTA005669.2,BTA002304.1,BTA020438.1,BTA018494.1,BTA009445.1,BTA030010.1,BTA004526.1,BTA013611.1,BTA…
GO:0005245	voltage-gated calcium channel activity	molecular_function	0.10861	1	4	8211	4	14362	BTA001407.1,BTA002708.1,BTA012852.1,BTA029122.3
GO:0006906	vesicle fusion	biological_process	0.10923	1	4	8211	4	14362	BTA016227.1,BTA016246.1,BTA009970.1,BTA030085.1;support_id=CUFF124.220.1
GO:0048280	vesicle fusion with Golgi apparatus	biological_process	0.10923	1	4	8211	4	14362	BTA016227.1,BTA030085.1;support_id=CUFF124.220.1,BTA009970.1,BTA016246.1
GO:0090174	organelle membrane fusion	biological_process	0.10923	1	4	8211	4	14362	BTA016227.1,BTA030085.1;support_id=CUFF124.220.1,BTA009970.1,BTA016246.1
GO:0033821	DNA beta-glucosyltransferase activity	molecular_function	0.10963	1	4	8211	4	14362	BTA006413.1;support_id=CUFF27.326.1,BTA004392.1,BTA018055.1,BTA026613.1
GO:0030472	mitotic spindle organization in nucleus	biological_process	0.10981	1	4	8211	4	14362	BTA019773.1,BTA030028.1,BTA011244.1,BTA020008.2
GO:0004649	poly(ADP-ribose) glycohydrolase activity	molecular_function	0.11014	1	4	8211	4	14362	BTA007939.1,BTA005879.1,BTA003837.1,BTA014730.1
GO:0098655	cation transmembrane transport	biological_process	0.11023	1	125	8211	203	14362	BTA019276.1,BTA029209.1,BTA018475.1,BTA019503.1,BTA020719.1;support_id=CUFF86.420.1,BTA010276.1;support_id=CUFF43.403.2,BTA007524.1,BTA026114.1;support_id=CUFF107.558.1,BTA015878.1;support_id=CUFF68.52.1,BTA000370.1,BTA018678.1,BTA009942.1;support_id=CUFF42.456.1,BTA014720.1,BTA026441.1,BTA025211.1,BTA007709.1,BTA022400.2;support_id=CUFF93.91.1,BTA012852.1,BTA008317.1,BTA013064.1,BTA020190.1;supp…
GO:0001614	purinergic nucleotide receptor activity	molecular_function	0.11031	1	4	8211	4	14362	BTA020190.1;support_id=CUFF84.148.2,BTA006056.1;support_id=CUFF26.288.2,BTA002491.1,BTA010276.1;support_id=CUFF43.403.2
GO:0004931	extracellular ATP-gated cation channel activity	molecular_function	0.11031	1	4	8211	4	14362	BTA010276.1;support_id=CUFF43.403.2,BTA002491.1,BTA006056.1;support_id=CUFF26.288.2,BTA020190.1;support_id=CUFF84.148.2
GO:0014074	response to purine-containing compound	biological_process	0.11031	1	4	8211	4	14362	BTA010276.1;support_id=CUFF43.403.2,BTA002491.1,BTA006056.1;support_id=CUFF26.288.2,BTA020190.1;support_id=CUFF84.148.2
GO:0016502	nucleotide receptor activity	molecular_function	0.11031	1	4	8211	4	14362	BTA020190.1;support_id=CUFF84.148.2,BTA010276.1;support_id=CUFF43.403.2,BTA002491.1,BTA006056.1;support_id=CUFF26.288.2
GO:0033198	response to ATP	biological_process	0.11031	1	4	8211	4	14362	BTA020190.1;support_id=CUFF84.148.2,BTA002491.1,BTA010276.1;support_id=CUFF43.403.2,BTA006056.1;support_id=CUFF26.288.2
GO:0035381	ATP-gated ion channel activity	molecular_function	0.11031	1	4	8211	4	14362	BTA020190.1;support_id=CUFF84.148.2,BTA006056.1;support_id=CUFF26.288.2,BTA010276.1;support_id=CUFF43.403.2,BTA002491.1
GO:0035586	purinergic receptor activity	molecular_function	0.11031	1	4	8211	4	14362	BTA006056.1;support_id=CUFF26.288.2,BTA002491.1,BTA010276.1;support_id=CUFF43.403.2,BTA020190.1;support_id=CUFF84.148.2
GO:0046683	response to organophosphorus	biological_process	0.11031	1	4	8211	4	14362	BTA020190.1;support_id=CUFF84.148.2,BTA002491.1,BTA010276.1;support_id=CUFF43.403.2,BTA006056.1;support_id=CUFF26.288.2
GO:0016491	oxidoreductase activity	molecular_function	0.11062	1	813	8211	1383	14362	BTA030081.1,BTA027081.1,BTA009562.1,BTA023304.1,BTA012314.1,BTA003776.1;support_id=CUFF17.298.2,BTA022587.1,BTA014798.1,BTA025513.1,BTA018055.1,BTA005851.1,BTA004649.1,BTA021612.2,BTA010480.1,BTA028311.1,BTA029457.1,BTA029697.1,BTA016347.1,BTA016919.1;support_id=CUFF72.434.1,BTA011256.1,BTA012901.2,BTA022288.1,BTA016716.1,BTA013672.1,BTA023861.4,BTA027042.1,BTA025307.1,BTA030040.1,BTA022324.1,BTA…
GO:0005342	organic acid transmembrane transporter activity	molecular_function	0.11087	1	34	8211	51	14362	BTA019668.1,BTA023399.1,BTA023660.1,BTA021471.1;support_id=CUFF89.562.1,BTA029737.1,BTA022352.1,BTA026193.1,BTA018661.1,BTA028537.1,BTA014848.2,BTA004007.1,BTA029738.1,BTA023952.1,BTA019245.1,BTA011100.1,BTA029883.1,BTA023639.1,BTA006031.1,BTA021509.1,BTA006783.2,BTA010928.1,BTA014963.1,BTA018666.1,BTA023425.1,BTA021661.1,BTA025433.1,BTA006914.1,BTA006033.1,BTA017256.1,BTA028838.1,BTA002965.1,BTA…
GO:0046943	carboxylic acid transmembrane transporter activity	molecular_function	0.11087	1	34	8211	51	14362	BTA023628.1,BTA003629.1,BTA002006.1,BTA017256.1,BTA006033.1,BTA002965.1,BTA028838.1,BTA021661.1,BTA025433.1,BTA006914.1,BTA021509.1,BTA006783.2,BTA023425.1,BTA014963.1,BTA010928.1,BTA018666.1,BTA023639.1,BTA006031.1,BTA011100.1,BTA029883.1,BTA004007.1,BTA029738.1,BTA023952.1,BTA014848.2,BTA019245.1,BTA029737.1,BTA022352.1,BTA026193.1,BTA018661.1,BTA028537.1,BTA019668.1,BTA023399.1,BTA021471.1;sup…
GO:0004045	aminoacyl-tRNA hydrolase activity	molecular_function	0.11215	1	6	8211	7	14362	BTA014209.2,BTA009805.1,BTA002871.1,BTA017261.1,BTA023121.1,BTA014108.1
GO:0016668	oxidoreductase activity, acting on a sulfur group of donors, NAD(P) as acceptor	molecular_function	0.11405	1	14	8211	19	14362	BTA004620.1;support_id=CUFF20.433.2,BTA022975.1,BTA028542.1,BTA004236.1,BTA027146.1;support_id=CUFF111.646.1,BTA017746.1,BTA026910.1,BTA026807.1,BTA014695.1,BTA013672.1,BTA002493.1,BTA025703.1,BTA021762.1,BTA010751.1
GO:0047134	protein-disulfide reductase activity	molecular_function	0.11405	1	14	8211	19	14362	BTA004620.1;support_id=CUFF20.433.2,BTA022975.1,BTA026910.1,BTA026807.1,BTA014695.1,BTA013672.1,BTA025703.1,BTA002493.1,BTA021762.1,BTA010751.1,BTA028542.1,BTA027146.1;support_id=CUFF111.646.1,BTA017746.1,BTA004236.1
GO:0006793	phosphorus metabolic process	biological_process	0.11411	1	475	8211	800	14362	BTA007190.1,BTA001687.1,BTA000385.1,BTA004938.1,BTA010836.1,BTA008112.1,BTA014344.1,BTA002216.1,BTA018372.1,BTA010679.1,BTA003896.1,BTA023731.1,BTA014761.1,BTA026299.1,BTA002313.1,BTA012496.1,BTA022196.1,BTA029748.1,BTA026986.1,BTA027343.1,BTA006141.1,BTA003171.1,BTA002011.1,BTA025566.1,BTA012855.1,BTA006928.1,BTA025058.1,BTA002926.1,BTA025772.1,BTA020155.1,BTA017520.1,BTA018000.1,BTA009463.1,BTA…
GO:0015934	large ribosomal subunit	cellular_component	0.11595	1	10	8211	13	14362	BTA004399.1,BTA005898.1,BTA003248.1,BTA019288.1,BTA024957.1,BTA028898.1,BTA026298.3,BTA007912.1,BTA030101.1,BTA016517.1;support_id=CUFF71.339.1
GO:0000221	vacuolar proton-transporting V-type ATPase, V1 domain	cellular_component	0.11679	1	19	8211	27	14362	BTA028693.3,BTA008317.1,BTA011431.1,BTA023291.1,BTA015367.1,BTA024873.1,BTA011737.1,BTA006777.1,BTA013524.1,BTA005419.2,BTA001188.2,BTA029770.1,BTA024822.1,BTA029078.1,BTA014720.1,BTA004057.1,BTA024047.1,BTA022767.1,BTA024806.1
GO:0016471	vacuolar proton-transporting V-type ATPase complex	cellular_component	0.11679	1	19	8211	27	14362	BTA028693.3,BTA011431.1,BTA008317.1,BTA023291.1,BTA015367.1,BTA024873.1,BTA006777.1,BTA011737.1,BTA013524.1,BTA005419.2,BTA001188.2,BTA029770.1,BTA024822.1,BTA029078.1,BTA004057.1,BTA014720.1,BTA022767.1,BTA024047.1,BTA024806.1
GO:0009432	SOS response	biological_process	0.11719	1	10	8211	13	14362	BTA023919.1,BTA013426.1,BTA002917.1,BTA015759.1,BTA028770.1,BTA002910.1,BTA002901.1,BTA002995.1,BTA019084.1,BTA007891.1
GO:0015994	chlorophyll metabolic process	biological_process	0.11749	1	12	8211	16	14362	BTA007388.2,BTA026055.1,BTA001993.1,BTA019657.1,BTA000687.1,BTA003085.1;support_id=CUFF13.76.1,BTA024706.1,BTA027948.1,BTA007292.1,BTA010956.1,BTA001319.1,BTA008540.1
GO:0043549	regulation of kinase activity	biological_process	0.11815	1	6	8211	7	14362	BTA027118.1,BTA014842.1,BTA000111.1,BTA002108.1,BTA015558.1,BTA019417.1
GO:0045859	regulation of protein kinase activity	biological_process	0.11815	1	6	8211	7	14362	BTA027118.1,BTA000111.1,BTA002108.1,BTA014842.1,BTA019417.1,BTA015558.1
GO:0016020	membrane	cellular_component	0.11893	1	2175	8211	3745	14362	BTA003003.1,BTA010658.1,BTA028304.1,BTA006505.1,BTA011169.1,BTA024994.1,BTA015594.1,BTA007615.1,BTA004057.1,BTA011081.1,BTA027651.1,BTA016782.1,BTA007597.1,BTA016720.1,BTA016741.1,BTA009133.1,BTA020358.1,BTA007230.1,BTA020218.1,BTA004765.1,BTA007190.1,BTA028252.1,BTA014925.1,BTA024806.1,BTA018710.1,BTA023731.1,BTA029744.2;support_id=CUFF121.938.2,BTA001188.2,BTA006588.1,BTA024117.1,BTA006311.1;su…
GO:0044413	avoidance of host defenses	biological_process	0.11942	1	8	8211	10	14362	BTA012678.1,BTA003020.1,BTA019619.1,BTA011942.1,BTA018447.1,BTA016814.1,BTA000481.1,BTA005669.2
GO:0044415	evasion or tolerance of host defenses	biological_process	0.11942	1	8	8211	10	14362	BTA018447.1,BTA011942.1,BTA016814.1,BTA005669.2,BTA000481.1,BTA019619.1,BTA003020.1,BTA012678.1
GO:0051832	avoidance of defenses of other organism involved in symbiotic interaction	biological_process	0.11942	1	8	8211	10	14362	BTA018447.1,BTA011942.1,BTA016814.1,BTA000481.1,BTA005669.2,BTA003020.1,BTA019619.1,BTA012678.1
GO:0051834	evasion or tolerance of defenses of other organism involved in symbiotic interaction	biological_process	0.11942	1	8	8211	10	14362	BTA003020.1,BTA019619.1,BTA012678.1,BTA000481.1,BTA005669.2,BTA016814.1,BTA018447.1,BTA011942.1
GO:0052173	response to defenses of other organism involved in symbiotic interaction	biological_process	0.11942	1	8	8211	10	14362	BTA005669.2,BTA000481.1,BTA011942.1,BTA018447.1,BTA016814.1,BTA012678.1,BTA019619.1,BTA003020.1
GO:0052200	response to host defenses	biological_process	0.11942	1	8	8211	10	14362	BTA012678.1,BTA019619.1,BTA003020.1,BTA018447.1,BTA011942.1,BTA016814.1,BTA000481.1,BTA005669.2
GO:0075136	response to host	biological_process	0.11942	1	8	8211	10	14362	BTA018447.1,BTA011942.1,BTA016814.1,BTA005669.2,BTA000481.1,BTA019619.1,BTA003020.1,BTA012678.1
GO:0046834	lipid phosphorylation	biological_process	0.11984	1	6	8211	7	14362	BTA003896.1,BTA020621.1,BTA000343.1,BTA010984.1,BTA006141.1,BTA023611.1
GO:0046854	phosphatidylinositol phosphorylation	biological_process	0.11984	1	6	8211	7	14362	BTA003896.1,BTA020621.1,BTA000343.1,BTA010984.1,BTA006141.1,BTA023611.1
GO:0017080	sodium channel regulator activity	molecular_function	0.12045	1	10	8211	13	14362	BTA012313.1,BTA006928.1,BTA008362.2,BTA027704.2,BTA027623.3,BTA024337.1,BTA016060.1;support_id=CUFF69.88.2,BTA027398.1,BTA005575.1;support_id=CUFF24.417.1,BTA028719.1
GO:0019871	sodium channel inhibitor activity	molecular_function	0.12045	1	10	8211	13	14362	BTA012313.1,BTA006928.1,BTA008362.2,BTA027623.3,BTA027704.2,BTA024337.1,BTA016060.1;support_id=CUFF69.88.2,BTA027398.1,BTA005575.1;support_id=CUFF24.417.1,BTA028719.1
GO:0006750	glutathione biosynthetic process	biological_process	0.12063	1	6	8211	7	14362	BTA022077.1,BTA023405.1,BTA007023.1,BTA019858.1;support_id=CUFF83.17.1,BTA013757.1,BTA028311.1
GO:0006796	phosphate-containing compound metabolic process	biological_process	0.12198	1	471	8211	794	14362	BTA016429.1,BTA021666.1,BTA011776.1,BTA023130.1,BTA029530.1,BTA020345.1,BTA013656.1,BTA026609.1,BTA007882.1,BTA018678.1,BTA012720.1,BTA028526.1,BTA012014.1,BTA028898.1,BTA006290.1,BTA018488.1,BTA001251.1;support_id=CUFF4.720.1,BTA012188.2,BTA002416.3,BTA022663.1,BTA009447.1,BTA028976.1,BTA017267.1,BTA010391.1,BTA000543.1,BTA016421.1,BTA019151.1,BTA002147.1;support_id=CUFF9.207.1,BTA020444.1,BTA02…
GO:0019362	pyridine nucleotide metabolic process	biological_process	0.12213	1	35	8211	53	14362	BTA018111.1,BTA010938.1,BTA018000.1,BTA008367.1,BTA004841.1,BTA013293.1,BTA007219.2,BTA024733.1,BTA022589.4,BTA010951.1,BTA023447.1,BTA012322.1,BTA013295.1,BTA001197.1,BTA020661.1,BTA006592.1,BTA020941.1,BTA020575.1,BTA021924.1,BTA018016.1,BTA020949.1,BTA003848.1;support_id=CUFF17.478.1,BTA025864.1,BTA029569.1,BTA018372.1,BTA011219.1,BTA000518.1,BTA001527.1,BTA023498.1,BTA001602.1,BTA027927.1,BTA…
GO:0046496	nicotinamide nucleotide metabolic process	biological_process	0.12213	1	35	8211	53	14362	BTA023447.1,BTA010951.1,BTA013295.1,BTA012322.1,BTA022589.4,BTA024733.1,BTA006592.1,BTA001197.1,BTA020661.1,BTA008367.1,BTA018000.1,BTA010938.1,BTA018111.1,BTA007219.2,BTA004841.1,BTA013293.1,BTA023498.1,BTA001527.1,BTA001602.1,BTA027927.1,BTA004831.1,BTA000506.1,BTA020438.1,BTA030010.1,BTA021924.1,BTA018016.1,BTA020941.1,BTA020575.1,BTA029569.1,BTA000518.1,BTA011219.1,BTA018372.1,BTA025864.1,BTA…
GO:0006094	gluconeogenesis	biological_process	0.12214	1	10	8211	13	14362	BTA004841.1,BTA013293.1,BTA019499.1;support_id=CUFF81.33.1,BTA003667.1,BTA011219.1,BTA000518.1,BTA000542.1,BTA024733.1,BTA013295.1,BTA028750.1
GO:0019319	hexose biosynthetic process	biological_process	0.12214	1	10	8211	13	14362	BTA000542.1,BTA000518.1,BTA011219.1,BTA004841.1,BTA013293.1,BTA019499.1;support_id=CUFF81.33.1,BTA003667.1,BTA013295.1,BTA028750.1,BTA024733.1
GO:0046364	monosaccharide biosynthetic process	biological_process	0.12214	1	10	8211	13	14362	BTA024733.1,BTA028750.1,BTA013295.1,BTA003667.1,BTA019499.1;support_id=CUFF81.33.1,BTA013293.1,BTA004841.1,BTA000542.1,BTA011219.1,BTA000518.1
GO:0009628	response to abiotic stimulus	biological_process	0.12218	1	8	8211	10	14362	BTA029930.1,BTA011934.1,BTA006289.1,BTA014027.1,BTA000719.1,BTA019206.1,BTA027435.1,BTA016631.1
GO:0004560	alpha-L-fucosidase activity	molecular_function	0.1223	1	10	8211	13	14362	BTA028276.1,BTA018787.1,BTA018151.1;support_id=CUFF76.255.1,BTA001507.1,BTA011479.1,BTA022269.1,BTA027813.1,BTA028279.1,BTA009482.1,BTA006174.1
GO:0015928	fucosidase activity	molecular_function	0.1223	1	10	8211	13	14362	BTA011479.1,BTA018151.1;support_id=CUFF76.255.1,BTA001507.1,BTA018787.1,BTA028276.1,BTA006174.1,BTA009482.1,BTA028279.1,BTA027813.1,BTA022269.1
GO:0005750	mitochondrial respiratory chain complex III	cellular_component	0.12265	1	6	8211	7	14362	BTA026055.1,BTA001571.2,BTA018319.1,BTA013611.1,BTA013656.1,BTA008540.1
GO:0006122	mitochondrial electron transport, ubiquinol to cytochrome c	biological_process	0.12265	1	6	8211	7	14362	BTA008540.1,BTA013656.1,BTA018319.1,BTA013611.1,BTA001571.2,BTA026055.1
GO:0045275	respiratory chain complex III	cellular_component	0.12265	1	6	8211	7	14362	BTA008540.1,BTA013656.1,BTA018319.1,BTA013611.1,BTA001571.2,BTA026055.1
GO:0044391	ribosomal subunit	cellular_component	0.12269	1	15	8211	21	14362	BTA016517.1;support_id=CUFF71.339.1,BTA005669.2,BTA000472.1;support_id=CUFF2.806.1,BTA030101.1,BTA013211.3,BTA007912.1,BTA026298.3,BTA019288.1,BTA028898.1,BTA024957.1,BTA013137.1,BTA005898.1,BTA003248.1,BTA004399.1,BTA010444.1
GO:0009073	aromatic amino acid family biosynthetic process	biological_process	0.12274	1	8	8211	10	14362	BTA005546.1,BTA020786.1,BTA007577.1;support_id=CUFF32.152.1,BTA006067.1;support_id=CUFF26.309.1,BTA011954.1,BTA020199.1;support_id=CUFF84.171.1,BTA018285.1,BTA018333.1
GO:0016485	protein processing	biological_process	0.12308	1	25	8211	37	14362	BTA014200.1,BTA007235.1,BTA000360.2,BTA007806.1,BTA017124.1,BTA018548.1;support_id=CUFF77.246.1,BTA027075.1,BTA020548.2,BTA010751.1,BTA012160.1,BTA026575.1,BTA010385.1;support_id=CUFF43.665.2,BTA011187.2,BTA004692.1,BTA027841.1,BTA016300.1,BTA024117.1,BTA027767.1,BTA018535.1,BTA002497.1,BTA027756.1,BTA011876.1,BTA004873.1,BTA000461.1,BTA013907.1;support_id=CUFF58.177.1
GO:0051604	protein maturation	biological_process	0.12308	1	25	8211	37	14362	BTA024117.1,BTA016300.1,BTA027841.1,BTA010385.1;support_id=CUFF43.665.2,BTA011187.2,BTA004692.1,BTA000461.1,BTA013907.1;support_id=CUFF58.177.1,BTA011876.1,BTA027756.1,BTA004873.1,BTA027767.1,BTA018535.1,BTA002497.1,BTA017124.1,BTA007806.1,BTA018548.1;support_id=CUFF77.246.1,BTA027075.1,BTA000360.2,BTA014200.1,BTA007235.1,BTA012160.1,BTA026575.1,BTA010751.1,BTA020548.2
GO:0005664	nuclear origin of replication recognition complex	cellular_component	0.12375	1	6	8211	7	14362	BTA029360.1,BTA026641.1,BTA030091.1,BTA006024.1,BTA027641.1,BTA016405.1
GO:0030414	peptidase inhibitor activity	molecular_function	0.12383	1	35	8211	53	14362	BTA024115.1,BTA006419.1,BTA007733.1,BTA004856.1,BTA018619.1,BTA022391.3,BTA030203.5,BTA009944.1,BTA029132.1,BTA021787.1,BTA020599.1,BTA026859.1,BTA006568.1,BTA021555.1,BTA023731.1,BTA011380.4,BTA019173.1,BTA029794.1,BTA001312.1,BTA016396.1,BTA017554.2;support_id=CUFF74.779.1,BTA017761.1,BTA000365.1,BTA003254.1,BTA029352.1,BTA013048.1,BTA013358.1,BTA010823.1;support_id=CUFF46.164.2,BTA010383.1,BTA…
GO:0061134	peptidase regulator activity	molecular_function	0.12383	1	35	8211	53	14362	BTA007733.1,BTA006419.1,BTA024115.1,BTA004856.1,BTA018619.1,BTA022391.3,BTA030203.5,BTA029132.1,BTA009944.1,BTA021787.1,BTA026859.1,BTA020599.1,BTA023731.1,BTA021555.1,BTA006568.1,BTA019173.1,BTA011380.4,BTA029794.1,BTA017554.2;support_id=CUFF74.779.1,BTA016396.1,BTA001312.1,BTA003254.1,BTA000365.1,BTA017761.1,BTA013048.1,BTA013358.1,BTA029352.1,BTA001608.1,BTA010384.1,BTA006158.1,BTA010823.1;sup…
GO:1902495	transmembrane transporter complex	cellular_component	0.12389	1	17	8211	24	14362	BTA002708.1,BTA026055.1,BTA012852.1,BTA018319.1,BTA013656.1,BTA015269.1,BTA000415.1,BTA013367.1,BTA001571.2,BTA008896.1;support_id=CUFF37.723.2,BTA018671.1,BTA008540.1,BTA006772.1,BTA001407.1,BTA029122.3,BTA013611.1,BTA020773.1
GO:1990351	transporter complex	cellular_component	0.12389	1	17	8211	24	14362	BTA008540.1,BTA018671.1,BTA008896.1;support_id=CUFF37.723.2,BTA001571.2,BTA013367.1,BTA000415.1,BTA015269.1,BTA013656.1,BTA018319.1,BTA012852.1,BTA002708.1,BTA026055.1,BTA020773.1,BTA013611.1,BTA029122.3,BTA001407.1,BTA006772.1
GO:0008514	organic anion transmembrane transporter activity	molecular_function	0.12397	1	35	8211	53	14362	BTA002006.1,BTA003629.1,BTA023628.1,BTA002965.1,BTA028838.1,BTA017256.1,BTA006033.1,BTA006914.1,BTA025433.1,BTA021661.1,BTA023425.1,BTA018666.1,BTA010928.1,BTA014963.1,BTA006783.2,BTA021509.1,BTA006031.1,BTA023639.1,BTA029883.1,BTA011100.1,BTA019245.1,BTA023952.1,BTA029738.1,BTA004007.1,BTA014848.2,BTA028537.1,BTA018661.1,BTA026193.1,BTA022352.1,BTA029737.1,BTA023660.1,BTA021471.1;support_id=CUFF…
GO:0051015	actin filament binding	molecular_function	0.12397	1	6	8211	7	14362	BTA017733.1,BTA017732.1,BTA011738.1,BTA025608.1,BTA021071.1,BTA000443.2
GO:0044782	cilium organization	biological_process	0.12411	1	6	8211	7	14362	BTA025651.1,BTA006047.1,BTA012353.1;support_id=CUFF52.61.1,BTA003530.1,BTA024840.4,BTA020999.2
GO:0007033	vacuole organization	biological_process	0.1244	1	10	8211	13	14362	BTA023731.1,BTA011625.1,BTA026299.1,BTA009484.1,BTA002944.1,BTA005527.1,BTA002147.1;support_id=CUFF9.207.1,BTA005964.1,BTA018619.1,BTA026859.1
GO:0005544	calcium-dependent phospholipid binding	molecular_function	0.12478	1	6	8211	7	14362	BTA016737.1,BTA021331.1,BTA009657.1,BTA020151.1,BTA002021.1;support_id=CUFF8.494.2,BTA029391.1
GO:0003883	CTP synthase activity	molecular_function	0.12481	1	6	8211	7	14362	BTA010323.1,BTA025851.1,BTA024707.2,BTA014761.1,BTA010170.1,BTA023130.1
GO:0045202	synapse	cellular_component	0.12512	1	8	8211	10	14362	BTA002977.1,BTA001627.1,BTA018577.1,BTA005520.1,BTA006956.1,BTA017790.1,BTA008433.3,BTA009344.1
GO:0016774	phosphotransferase activity, carboxyl group as acceptor	molecular_function	0.12546	1	8	8211	10	14362	BTA020438.1,BTA018016.1,BTA018000.1,BTA012322.1,BTA018111.1,BTA001602.1,BTA022589.4,BTA020136.1
GO:0006399	tRNA metabolic process	biological_process	0.1261	1	211	8211	349	14362	BTA009160.1,BTA024564.1,BTA010605.1,BTA012406.1,BTA024801.1;support_id=CUFF102.342.2,BTA027789.1,BTA016043.1,BTA010956.1,BTA024053.1,BTA013258.1,BTA027378.1,BTA023615.1,BTA020711.1,BTA004983.1,BTA023382.1,BTA027797.1,BTA021071.1,BTA008789.1,BTA008914.1,BTA025010.1,BTA023860.1;support_id=CUFF98.181.1,BTA023899.1,BTA009095.1,BTA004202.1,BTA019323.1,BTA006277.2,BTA018820.1,BTA026695.3,BTA018676.1,BT…
GO:0042162	telomeric DNA binding	molecular_function	0.12615	1	6	8211	7	14362	BTA003248.1,BTA011172.1,BTA002145.1,BTA019288.1,BTA007769.1,BTA010275.1
GO:0008519	ammonium transmembrane transporter activity	molecular_function	0.12619	1	6	8211	7	14362	BTA004487.1,BTA018319.1,BTA009016.1,BTA002008.1;support_id=CUFF8.429.1,BTA001799.1,BTA001331.1;support_id=CUFF5.63.2
GO:0006612	protein targeting to membrane	biological_process	0.12657	1	38	8211	58	14362	BTA006565.1,BTA022409.1,BTA003678.2,BTA024732.1,BTA020719.1;support_id=CUFF86.420.1,BTA023828.1,BTA021970.1,BTA001377.1,BTA009528.1,BTA021666.1,BTA017043.1,BTA023925.1,BTA026136.1,BTA024292.2,BTA018414.1,BTA009310.1,BTA009375.1,BTA003232.1,BTA018316.1,BTA004651.1,BTA010320.1,BTA013015.1,BTA000678.1,BTA009536.1,BTA012410.1,BTA009697.1,BTA000563.1,BTA005252.1,BTA019408.1,BTA015059.1,BTA022315.1,BTA…
GO:0032271	regulation of protein polymerization	biological_process	0.12666	1	22	8211	32	14362	BTA003196.1,BTA019868.1,BTA029098.1,BTA007215.1,BTA011796.1,BTA002340.1,BTA024785.1;support_id=CUFF102.306.1,BTA027151.1,BTA011643.1,BTA005963.1;support_id=CUFF26.1.1,BTA010479.1,BTA029737.1,BTA029531.1,BTA009746.2,BTA013283.1,BTA011072.1,BTA029084.1,BTA011285.1,BTA004909.1,BTA012679.1,BTA010292.1,BTA021474.1
GO:0043254	regulation of protein complex assembly	biological_process	0.12666	1	22	8211	32	14362	BTA021474.1,BTA010292.1,BTA012679.1,BTA004909.1,BTA011285.1,BTA011072.1,BTA029084.1,BTA013283.1,BTA009746.2,BTA029531.1,BTA029737.1,BTA010479.1,BTA005963.1;support_id=CUFF26.1.1,BTA011643.1,BTA027151.1,BTA024785.1;support_id=CUFF102.306.1,BTA002340.1,BTA011796.1,BTA029098.1,BTA007215.1,BTA019868.1,BTA003196.1
GO:0044431	Golgi apparatus part	cellular_component	0.12708	1	41	8211	63	14362	BTA013422.1,BTA029581.1,BTA029083.1,BTA001615.1,BTA019591.1,BTA011438.1,BTA019232.1,BTA030085.1;support_id=CUFF124.220.1,BTA023054.1,BTA011739.1,BTA011916.2,BTA029097.1,BTA000986.1,BTA027338.1,BTA029261.1;support_id=CUFF119.484.3,BTA014903.1;support_id=CUFF62.196.1,BTA001159.1,BTA024826.3,BTA012529.2,BTA003887.1,BTA022531.1,BTA022916.1,BTA009970.1,BTA000946.1,BTA004975.1,BTA016246.1,BTA000963.1,B…
GO:0030288	outer membrane-bounded periplasmic space	cellular_component	0.12728	1	6	8211	7	14362	BTA024027.1,BTA015323.1;support_id=CUFF65.89.2,BTA016121.1,BTA008866.1,BTA008865.1,BTA024929.1
GO:0007339	binding of sperm to zona pellucida	biological_process	0.12811	1	6	8211	7	14362	BTA026575.1,BTA008547.1,BTA023871.1,BTA009730.1,BTA011427.1,BTA003554.1
GO:0009988	cell-cell recognition	biological_process	0.12811	1	6	8211	7	14362	BTA003554.1,BTA011427.1,BTA009730.1,BTA023871.1,BTA008547.1,BTA026575.1
GO:0035036	sperm-egg recognition	biological_process	0.12811	1	6	8211	7	14362	BTA009730.1,BTA011427.1,BTA003554.1,BTA026575.1,BTA008547.1,BTA023871.1
GO:0004535	poly(A)-specific ribonuclease activity	molecular_function	0.12816	1	8	8211	10	14362	BTA002872.1,BTA010317.1,BTA018787.1,BTA012602.1,BTA007170.1,BTA024003.1,BTA021589.1,BTA003560.1
GO:0030131	clathrin adaptor complex	cellular_component	0.1284	1	8	8211	10	14362	BTA011737.1,BTA028948.1,BTA003821.1,BTA023219.1,BTA026255.1,BTA013352.1,BTA009864.1,BTA007004.1
GO:0071949	FAD binding	molecular_function	0.12843	1	35	8211	53	14362	BTA018355.1,BTA000515.1,BTA027785.1,BTA010956.1,BTA023455.1,BTA011512.1,BTA006928.1,BTA001337.1,BTA019157.1,BTA021578.1,BTA022325.1,BTA003300.1,BTA023899.1,BTA000674.1,BTA011503.1,BTA013454.1,BTA018339.1,BTA027797.1,BTA018446.1,BTA007433.1,BTA024278.1,BTA024535.1,BTA023304.1,BTA018346.1,BTA022051.1,BTA007014.1,BTA022189.1,BTA026118.1,BTA020902.1,BTA027040.1,BTA015558.1,BTA005848.1,BTA001472.1,BTA…
GO:0004347	glucose-6-phosphate isomerase activity	molecular_function	0.12854	1	6	8211	7	14362	BTA013293.1,BTA024733.1,BTA004841.1,BTA011219.1,BTA013295.1,BTA000518.1
GO:0030089	phycobilisome	cellular_component	0.12894	1	6	8211	7	14362	BTA000577.1,BTA001431.1,BTA022800.3;support_id=CUFF94.499.1,BTA017172.1,BTA020358.1,BTA019206.1
GO:0001934	positive regulation of protein phosphorylation	biological_process	0.12904	1	8	8211	10	14362	BTA011625.1,BTA023731.1,BTA019417.1,BTA002944.1,BTA002147.1;support_id=CUFF9.207.1,BTA026859.1,BTA005964.1,BTA018619.1
GO:0042327	positive regulation of phosphorylation	biological_process	0.12904	1	8	8211	10	14362	BTA005964.1,BTA018619.1,BTA026859.1,BTA002147.1;support_id=CUFF9.207.1,BTA002944.1,BTA019417.1,BTA023731.1,BTA011625.1
GO:0008037	cell recognition	biological_process	0.13025	1	8	8211	10	14362	BTA026575.1,BTA008547.1,BTA009730.1,BTA011427.1,BTA003682.5,BTA003554.1,BTA029272.1,BTA023871.1
GO:0008134	transcription factor binding	molecular_function	0.13067	1	73	8211	116	14362	BTA029173.1,BTA009312.1,BTA011326.1,BTA020099.1,BTA019304.1,BTA018973.1,BTA008788.2,BTA000300.1,BTA029183.1,BTA023013.1,BTA021668.1,BTA014327.2,BTA004830.1,BTA022427.3,BTA029163.1,BTA017368.1,BTA026578.1,BTA007899.1,BTA016243.1,BTA010272.1,BTA025472.1,BTA020719.1;support_id=CUFF86.420.1,BTA013767.1,BTA001461.2,BTA005132.1,BTA001332.1,BTA000539.1,BTA015656.2,BTA024292.2,BTA010576.3,BTA003076.1,BTA…
GO:0016459	myosin complex	cellular_component	0.13166	1	22	8211	32	14362	BTA007677.1,BTA028216.1,BTA022538.1,BTA016314.2,BTA003886.2,BTA023801.1,BTA024483.1,BTA009536.1,BTA024032.1,BTA004142.1,BTA025041.1,BTA025860.1,BTA012566.1,BTA005958.1,BTA021341.1,BTA023814.1,BTA020408.2,BTA009528.1,BTA029119.1;support_id=CUFF119.94.1,BTA010606.2,BTA021400.1,BTA007672.1
GO:0003896	DNA primase activity	molecular_function	0.13337	1	25	8211	37	14362	BTA012786.1,BTA002060.1,BTA022543.1,BTA002290.1,BTA014179.1,BTA010599.1,BTA012457.1,BTA000871.3,BTA018447.1,BTA026265.1;support_id=CUFF108.147.1,BTA025321.1,BTA016249.1,BTA029921.1,BTA028446.1;support_id=CUFF116.405.1,BTA023769.1,BTA014847.1,BTA013771.1,BTA002374.1;support_id=CUFF10.329.2,BTA020230.1,BTA025323.1,BTA024622.1,BTA026994.1,BTA020863.1,BTA021693.1,BTA024430.1
GO:0006886	intracellular protein transport	biological_process	0.13629	1	238	8211	396	14362	BTA029466.1,BTA004445.1,BTA030040.1,BTA020055.1,BTA024785.1,BTA006772.1,BTA018812.1,BTA017518.1,BTA025517.1,BTA001993.1,BTA000563.1,BTA020952.3,BTA023897.1,BTA009536.1,BTA027837.1,BTA010670.1,BTA019206.1,BTA026004.1,BTA018973.1,BTA019207.1,BTA005624.1,BTA009216.1,BTA015602.2,BTA011438.1,BTA009864.1,BTA014730.1,BTA029596.1,BTA006940.1,BTA014047.1,BTA016638.1,BTA008317.1,BTA002843.1,BTA024292.2,BTA…
GO:0016772	transferase activity, transferring phosphorus-containing groups	molecular_function	0.1387	1	693	8211	1179	14362	BTA002163.1,BTA029405.1;support_id=CUFF120.341.1,BTA028223.1,BTA028726.1,BTA000973.1,BTA006429.1,BTA026719.2,BTA020454.1;support_id=CUFF85.301.1,BTA017233.2,BTA022220.1,BTA000506.1,BTA008143.1,BTA018420.1,BTA012786.1,BTA019370.1,BTA009791.1,BTA002374.1;support_id=CUFF10.329.2,BTA017199.1,BTA000399.1,BTA004709.1,BTA021764.4,BTA029921.1,BTA027974.1,BTA011358.1,BTA014205.1,BTA000606.1,BTA008128.1,BT…
GO:0033365	protein localization to organelle	biological_process	0.13906	1	81	8211	130	14362	BTA000678.1,BTA009536.1,BTA000563.1,BTA021341.1,BTA008667.1,BTA015602.2,BTA009216.1,BTA022767.1,BTA010670.1,BTA005624.1,BTA018973.1,BTA001603.1,BTA015059.1,BTA006078.1,BTA010453.1,BTA020055.1,BTA029466.1,BTA021471.1;support_id=CUFF89.562.1,BTA018812.1,BTA003223.3,BTA009211.1,BTA006565.1,BTA024009.1,BTA020719.1;support_id=CUFF86.420.1,BTA003678.2,BTA024732.1,BTA010340.1,BTA017784.1,BTA021666.1,BTA…
GO:0016810	hydrolase activity, acting on carbon-nitrogen (but not peptide) bonds	molecular_function	0.14231	1	48	8211	75	14362	BTA021710.1,BTA026394.3,BTA018301.1,BTA007675.1,BTA016313.1,BTA001373.2;support_id=CUFF5.172.1,BTA007456.1,BTA017512.1,BTA017069.1,BTA004819.1,BTA012001.1,BTA024171.1,BTA027927.1,BTA020275.1,BTA020959.1,BTA026270.1,BTA023378.1,BTA021420.1,BTA005970.1,BTA007674.1,BTA028059.1,BTA020218.1,BTA022361.1,BTA013031.1,BTA022303.1,BTA003307.1,BTA028201.1,BTA007645.1,BTA001710.1,BTA030203.5,BTA010522.1,BTA0…
GO:0072348	sulfur compound transport	biological_process	0.14253	1	15	8211	21	14362	BTA011965.1,BTA028045.1,BTA001779.2,BTA001708.1,BTA029912.1,BTA011969.1,BTA016991.1,BTA007458.1,BTA019817.2,BTA011168.1,BTA028313.1,BTA011169.1,BTA010213.1,BTA015153.2,BTA004721.1
GO:1901682	sulfur compound transmembrane transporter activity	molecular_function	0.14253	1	15	8211	21	14362	BTA007458.1,BTA019817.2,BTA011168.1,BTA028313.1,BTA011169.1,BTA010213.1,BTA015153.2,BTA004721.1,BTA011965.1,BTA028045.1,BTA001779.2,BTA001708.1,BTA029912.1,BTA011969.1,BTA016991.1
GO:0098660	inorganic ion transmembrane transport	biological_process	0.14687	1	122	8211	200	14362	BTA030198.1,BTA003200.1,BTA016180.1,BTA023117.2;support_id=CUFF95.476.1,BTA016664.1,BTA026054.1,BTA012992.1,BTA028505.1,BTA006772.1,BTA018494.1,BTA027782.1,BTA024873.1,BTA002358.1,BTA002304.1,BTA019147.1,BTA005254.1,BTA004526.1,BTA028693.3,BTA009445.1,BTA022287.1,BTA021977.2,BTA012553.1,BTA024047.1,BTA022767.1,BTA012129.1,BTA005669.2,BTA028178.1,BTA024822.1,BTA006464.1,BTA000214.1,BTA018445.1,BTA…
GO:0035251	UDP-glucosyltransferase activity	molecular_function	0.14727	1	13	8211	18	14362	BTA009126.1,BTA017163.1,BTA021471.1;support_id=CUFF89.562.1,BTA014870.1,BTA026799.3;support_id=CUFF109.705.3,BTA027046.1,BTA001448.2;support_id=CUFF5.371.1,BTA008896.1;support_id=CUFF37.723.2,BTA002009.1;support_id=CUFF8.431.1,BTA012641.1,BTA009208.1,BTA017185.1,BTA005356.1;support_id=CUFF23.303.1
GO:0006865	amino acid transport	biological_process	0.14738	1	23	8211	34	14362	BTA003629.1,BTA002006.1,BTA029883.1,BTA000222.1,BTA023639.1,BTA028838.1,BTA019245.1,BTA014848.2,BTA004765.1,BTA017256.1,BTA004007.1,BTA018661.1,BTA028537.1,BTA026193.1,BTA021661.1,BTA018666.1,BTA014963.1,BTA023660.1,BTA023399.1,BTA006783.2,BTA021509.1,BTA019668.1,BTA009192.1
GO:0004518	nuclease activity	molecular_function	0.14751	1	176	8211	291	14362	BTA016848.2;support_id=CUFF72.270.1,BTA004780.1;support_id=CUFF21.451.1,BTA015457.1,BTA027428.1,BTA017543.2,BTA029928.1,BTA019180.1,BTA027678.1,BTA021586.1,BTA021671.1,BTA003171.1,BTA017725.1,BTA024401.1,BTA025523.2,BTA024483.1,BTA027239.1,BTA003091.1,BTA009030.2,BTA024448.1,BTA029876.1,BTA017740.1,BTA029400.1,BTA019341.1,BTA004516.1,BTA021590.1,BTA003435.1,BTA005152.1,BTA000813.1,BTA025540.3,BTA…
GO:0070069	cytochrome complex	cellular_component	0.14756	1	18	8211	26	14362	BTA008540.1,BTA001571.2,BTA018319.1,BTA013656.1,BTA017043.1,BTA024027.1,BTA026055.1,BTA026530.1,BTA013611.1,BTA001895.1,BTA022534.1,BTA026297.1,BTA029165.1,BTA023135.1;support_id=CUFF95.537.1,BTA018184.1,BTA003223.3,BTA006281.1,BTA019459.1
GO:0007283	spermatogenesis	biological_process	0.14937	1	13	8211	18	14362	BTA001309.1,BTA014118.1,BTA012945.1,BTA023255.1,BTA003784.1;support_id=CUFF17.316.1,BTA002147.1;support_id=CUFF9.207.1,BTA029395.1,BTA014782.1;support_id=CUFF61.626.1,BTA005961.1,BTA003881.1,BTA026114.1;support_id=CUFF107.558.1,BTA028744.1;support_id=CUFF117.740.2,BTA014089.3
GO:0048232	male gamete generation	biological_process	0.14937	1	13	8211	18	14362	BTA014118.1,BTA012945.1,BTA023255.1,BTA003784.1;support_id=CUFF17.316.1,BTA002147.1;support_id=CUFF9.207.1,BTA001309.1,BTA029395.1,BTA014782.1;support_id=CUFF61.626.1,BTA005961.1,BTA003881.1,BTA028744.1;support_id=CUFF117.740.2,BTA014089.3,BTA026114.1;support_id=CUFF107.558.1
GO:0006613	cotranslational protein targeting to membrane	biological_process	0.14983	1	37	8211	57	14362	BTA004651.1,BTA010320.1,BTA018316.1,BTA003232.1,BTA009375.1,BTA009310.1,BTA018414.1,BTA024292.2,BTA026136.1,BTA023925.1,BTA017043.1,BTA021666.1,BTA009528.1,BTA001377.1,BTA021970.1,BTA023828.1,BTA024732.1,BTA003678.2,BTA022409.1,BTA006565.1,BTA003223.3,BTA009563.1,BTA016180.1,BTA022312.1,BTA000359.1,BTA024334.1,BTA022227.1,BTA022315.1,BTA015059.1,BTA019408.1,BTA005252.1,BTA000563.1,BTA009697.1,BTA…
GO:0000139	Golgi membrane	cellular_component	0.15066	1	21	8211	31	14362	BTA029097.1,BTA012343.1,BTA000946.1,BTA029581.1,BTA029083.1,BTA011438.1,BTA030085.1;support_id=CUFF124.220.1,BTA016246.1,BTA000963.1,BTA019591.1,BTA016227.1,BTA003887.1,BTA017946.1,BTA002604.1,BTA009970.1,BTA022916.1,BTA027338.1,BTA029261.1;support_id=CUFF119.484.3,BTA024826.3,BTA000404.1,BTA017093.1
GO:0016010	dystrophin-associated glycoprotein complex	cellular_component	0.1548	1	11	8211	15	14362	BTA005234.2,BTA019598.1,BTA021718.1,BTA022278.1,BTA019041.1,BTA002318.1,BTA010860.1,BTA017353.1,BTA002314.1,BTA027714.1,BTA011360.1
GO:0004127	cytidylate kinase activity	molecular_function	0.15498	1	11	8211	15	14362	BTA024051.1,BTA015301.1,BTA002163.1,BTA019459.1,BTA001194.1,BTA024053.1,BTA018419.1,BTA027847.1,BTA001192.1,BTA005252.1,BTA001467.1
GO:0005975	carbohydrate metabolic process	biological_process	0.1556	1	370	8211	623	14362	BTA017903.1,BTA003667.1,BTA011083.1,BTA019323.1,BTA017185.1,BTA019173.1,BTA020266.2,BTA021836.3,BTA010740.1,BTA019504.1,BTA008060.1,BTA004490.1;support_id=CUFF20.170.2,BTA010782.1;support_id=CUFF46.75.1,BTA008316.1,BTA017297.1,BTA003227.1,BTA009208.1,BTA025747.1,BTA028273.1,BTA017167.1,BTA013293.1,BTA021615.1,BTA024038.1,BTA007134.1,BTA008540.1,BTA001550.1,BTA027167.1,BTA029780.2,BTA021888.1,BTA0…
GO:0016868	intramolecular transferase activity, phosphotransferases	molecular_function	0.15693	1	11	8211	15	14362	BTA010351.1,BTA002216.1,BTA026285.1,BTA009430.1,BTA009704.1,BTA023898.1,BTA004854.1,BTA018371.1,BTA008055.1,BTA021836.3,BTA026738.1
GO:0000808	origin recognition complex	cellular_component	0.15745	1	11	8211	15	14362	BTA001935.1,BTA001450.1,BTA030091.1,BTA029360.1,BTA026641.1,BTA026450.2,BTA016405.1,BTA025015.1,BTA006024.1,BTA027641.1,BTA012800.1
GO:0016758	transferase activity, transferring hexosyl groups	molecular_function	0.1582	1	142	8211	234	14362	BTA009524.1,BTA018877.1,BTA016775.1,BTA011174.1,BTA004765.1,BTA004525.1,BTA024445.1;support_id=CUFF100.445.1,BTA025529.1,BTA026299.1,BTA009129.1,BTA002009.1;support_id=CUFF8.431.1,BTA005356.1;support_id=CUFF23.303.1,BTA005138.1,BTA012444.1,BTA019574.1,BTA012529.2,BTA021350.1,BTA027046.1,BTA028994.1,BTA023767.1,BTA020426.1,BTA022063.1,BTA000963.1,BTA011081.1,BTA001448.2;support_id=CUFF5.371.1,BTA0…
GO:0006221	pyrimidine nucleotide biosynthetic process	biological_process	0.15915	1	16	8211	23	14362	BTA023130.1,BTA027970.1,BTA021666.1,BTA029743.1,BTA002736.1,BTA014761.1,BTA025560.1,BTA012188.2,BTA025851.1,BTA019457.2,BTA010323.1,BTA024707.2,BTA010170.1,BTA025372.1,BTA002013.1,BTA022953.1
GO:0015144	carbohydrate transmembrane transporter activity	molecular_function	0.16053	1	24	8211	36	14362	BTA003893.1,BTA003887.1,BTA017120.1;support_id=CUFF73.385.1,BTA029996.1;support_id=CUFF123.242.1,BTA004069.1;support_id=CUFF18.495.3,BTA021021.1,BTA005826.1,BTA007223.1,BTA014903.1;support_id=CUFF62.196.1,BTA017134.1,BTA021471.1;support_id=CUFF89.562.1,BTA010928.1,BTA015301.1,BTA013135.1,BTA000563.1,BTA020719.1;support_id=CUFF86.420.1,BTA012343.1,BTA029097.1,BTA019610.1,BTA029083.1,BTA029581.1,BT…
GO:1901476	carbohydrate transporter activity	molecular_function	0.16053	1	24	8211	36	14362	BTA003893.1,BTA003887.1,BTA029996.1;support_id=CUFF123.242.1,BTA004069.1;support_id=CUFF18.495.3,BTA021021.1,BTA017120.1;support_id=CUFF73.385.1,BTA014903.1;support_id=CUFF62.196.1,BTA005826.1,BTA007223.1,BTA015301.1,BTA010928.1,BTA017134.1,BTA021471.1;support_id=CUFF89.562.1,BTA000563.1,BTA013135.1,BTA020719.1;support_id=CUFF86.420.1,BTA019610.1,BTA012343.1,BTA029097.1,BTA013597.2;support_id=CUF…
GO:0098662	inorganic cation transmembrane transport	biological_process	0.16085	1	121	8211	199	14362	BTA028127.1,BTA024967.1,BTA000395.1,BTA004775.1,BTA005597.1;support_id=CUFF24.472.4,BTA011581.1,BTA026977.1;support_id=CUFF111.226.1,BTA004718.1,BTA023291.1,BTA014855.1,BTA026401.1,BTA009208.1,BTA018679.1,BTA012506.1,BTA002481.1,BTA025671.1,BTA004323.1;support_id=CUFF19.529.2,BTA009037.1,BTA008539.1,BTA024806.1,BTA005419.2,BTA010385.1;support_id=CUFF43.665.2,BTA017930.1;support_id=CUFF75.851.2,BT…
GO:0006605	protein targeting	biological_process	0.16094	1	87	8211	141	14362	BTA009375.1,BTA018414.1,BTA028186.3,BTA006914.1,BTA011881.1,BTA020771.1,BTA026755.1,BTA004651.1,BTA010320.1,BTA018316.1,BTA026579.1,BTA022409.1,BTA021970.1,BTA023828.1,BTA019441.1,BTA001377.1,BTA002749.1,BTA004164.2,BTA004057.1,BTA008797.1,BTA024334.1,BTA000359.1,BTA022312.1,BTA029182.1,BTA009563.1,BTA009058.1,BTA008897.1,BTA012410.1,BTA013015.1,BTA028040.1;support_id=CUFF115.8.1,BTA005252.1,BTA0…
GO:0008081	phosphoric diester hydrolase activity	molecular_function	0.16151	1	35	8211	54	14362	BTA027340.1,BTA001467.1,BTA024420.1,BTA020339.1,BTA022733.3,BTA021303.1,BTA021994.1,BTA022255.1,BTA016175.1,BTA009410.1,BTA029401.1,BTA018503.1,BTA025528.1,BTA026614.1,BTA005121.2;support_id=CUFF22.375.1,BTA014946.1,BTA010586.1,BTA028372.1,BTA022931.1,BTA005175.1,BTA017819.1,BTA030183.1,BTA009477.1,BTA020136.1,BTA019531.1,BTA006720.1,BTA021189.1,BTA017143.1,BTA008004.1,BTA015701.1,BTA017077.1,BTA…
GO:0030291	protein serine/threonine kinase inhibitor activity	molecular_function	0.16302	1	7	8211	9	14362	BTA025250.1,BTA015555.1,BTA015558.1,BTA027912.1,BTA015556.1,BTA008132.1,BTA000111.1
GO:0006165	nucleoside diphosphate phosphorylation	biological_process	0.16361	1	24	8211	36	14362	BTA010951.1,BTA012322.1,BTA013295.1,BTA024733.1,BTA001527.1,BTA023498.1,BTA027927.1,BTA001602.1,BTA022589.4,BTA002013.1,BTA020438.1,BTA030010.1,BTA018016.1,BTA018000.1,BTA027970.1,BTA010938.1,BTA018111.1,BTA020575.1,BTA029569.1,BTA011219.1,BTA000518.1,BTA004841.1,BTA002736.1,BTA013293.1
GO:0046939	nucleotide phosphorylation	biological_process	0.16361	1	24	8211	36	14362	BTA020438.1,BTA002013.1,BTA030010.1,BTA013295.1,BTA012322.1,BTA010951.1,BTA027927.1,BTA022589.4,BTA001602.1,BTA001527.1,BTA023498.1,BTA024733.1,BTA011219.1,BTA000518.1,BTA029569.1,BTA013293.1,BTA002736.1,BTA004841.1,BTA027970.1,BTA018016.1,BTA018000.1,BTA020575.1,BTA018111.1,BTA010938.1
GO:1901363	heterocyclic compound binding	molecular_function	0.16393	1	2604	8211	4503	14362	BTA002577.1,BTA015000.1,BTA000209.1,BTA012322.1,BTA021534.2;support_id=CUFF89.776.2,BTA006159.1,BTA010576.3,BTA024535.1,BTA007297.1,BTA009224.1,BTA001332.1,BTA000510.1,BTA000038.1,BTA012034.1,BTA002188.1,BTA015878.1;support_id=CUFF68.52.1,BTA026190.1,BTA025917.2,BTA020719.1;support_id=CUFF86.420.1,BTA022772.1,BTA027766.1,BTA025984.1,BTA007646.1,BTA009438.1,BTA002626.1,BTA022538.1,BTA023812.1;supp…
22312.1,BTA012406.1,BTA011399.1,BTA016043.1,BTA014764.3,BTA009127.1,BTA021411.1,BTA019649.1,BTA002108.1,BTA017141.1,BTA029099.1,BTA024913.1,BTA010055.2,BTA009095.1,BTA000286.1,BTA009046.1,BTA016777.1,BTA025752.1,BTA002301.1,BTA019151.1,BTA014849.1,BTA004866.1,BTA002222.1,BTA002785.1,BTA029875.1,BTA017016.1,BTA007170.1,BTA002491.1,BTA023890.1,BTA004745.1,BTA029701.1,BTA026298.3,BTA011242.1,BTA0042…
GO:0020037	heme binding	molecular_function	0.16402	1	133	8211	219	14362	BTA029697.1,BTA003438.1,BTA019749.1,BTA024009.1,BTA006170.1,BTA023861.4,BTA018744.1,BTA029743.1,BTA000981.1,BTA009122.1,BTA023663.1,BTA017094.1,BTA027081.1,BTA008325.1;support_id=CUFF35.253.1,BTA002500.1,BTA028147.1,BTA015403.1,BTA005851.1,BTA026610.1,BTA024784.1,BTA018445.1,BTA021421.1,BTA005225.1,BTA020299.1,BTA005966.1,BTA027705.1,BTA020632.1,BTA011962.1,BTA004331.1,BTA011966.1,BTA002399.1,BTA…
GO:0016108	tetraterpenoid metabolic process	biological_process	0.16563	1	32	8211	49	14362	BTA001472.1,BTA027042.1,BTA027040.1,BTA015558.1,BTA020902.1,BTA028083.1,BTA022189.1,BTA007014.1,BTA019496.1,BTA005938.1,BTA023304.1,BTA024535.1,BTA024278.1,BTA003202.1,BTA003201.1,BTA018339.1,BTA000674.1,BTA013454.1,BTA023899.1,BTA007301.1,BTA021578.1,BTA006928.1,BTA008354.1,BTA000908.1,BTA013390.1,BTA023455.1,BTA016527.1,BTA027785.1,BTA000515.1,BTA007016.1,BTA003200.1,BTA018355.1
GO:0016109	tetraterpenoid biosynthetic process	biological_process	0.16563	1	32	8211	49	14362	BTA027042.1,BTA015558.1,BTA027040.1,BTA020902.1,BTA028083.1,BTA022189.1,BTA007014.1,BTA019496.1,BTA001472.1,BTA024278.1,BTA003201.1,BTA003202.1,BTA005938.1,BTA023304.1,BTA024535.1,BTA021578.1,BTA018339.1,BTA000674.1,BTA013454.1,BTA023899.1,BTA007301.1,BTA000515.1,BTA007016.1,BTA003200.1,BTA018355.1,BTA008354.1,BTA006928.1,BTA000908.1,BTA023455.1,BTA013390.1,BTA016527.1,BTA027785.1
GO:0016116	carotenoid metabolic process	biological_process	0.16563	1	32	8211	49	14362	BTA005938.1,BTA023304.1,BTA024535.1,BTA024278.1,BTA003201.1,BTA003202.1,BTA001472.1,BTA027042.1,BTA027040.1,BTA015558.1,BTA020902.1,BTA022189.1,BTA028083.1,BTA007014.1,BTA019496.1,BTA008354.1,BTA006928.1,BTA000908.1,BTA023455.1,BTA013390.1,BTA016527.1,BTA027785.1,BTA000515.1,BTA007016.1,BTA018355.1,BTA003200.1,BTA018339.1,BTA013454.1,BTA000674.1,BTA023899.1,BTA007301.1,BTA021578.1
GO:0016117	carotenoid biosynthetic process	biological_process	0.16563	1	32	8211	49	14362	BTA023304.1,BTA024535.1,BTA005938.1,BTA003202.1,BTA003201.1,BTA024278.1,BTA001472.1,BTA007014.1,BTA022189.1,BTA028083.1,BTA019496.1,BTA027042.1,BTA020902.1,BTA027040.1,BTA015558.1,BTA023455.1,BTA013390.1,BTA027785.1,BTA016527.1,BTA008354.1,BTA006928.1,BTA000908.1,BTA003200.1,BTA018355.1,BTA007016.1,BTA000515.1,BTA023899.1,BTA007301.1,BTA013454.1,BTA000674.1,BTA018339.1,BTA021578.1
GO:0042277	peptide binding	molecular_function	0.16565	1	9	8211	12	14362	BTA010453.1,BTA028176.1,BTA003678.2,BTA024732.1,BTA022145.1,BTA004651.1,BTA008029.1,BTA010524.1,BTA009266.1
GO:0097159	organic cyclic compound binding	molecular_function	0.16591	1	2606	8211	4507	14362	BTA019322.1;support_id=CUFF80.266.2,BTA022507.1,BTA017224.1,BTA003681.1,BTA027056.1,BTA003288.1,BTA017360.1,BTA013016.1,BTA023647.1,BTA006365.1,BTA027388.3,BTA019284.1,BTA002910.1,BTA009570.1,BTA007605.1,BTA025043.1,BTA019855.1,BTA010049.1,BTA001872.1,BTA007660.1,BTA014152.1;support_id=CUFF59.200.1,BTA019354.1,BTA005115.1,BTA024631.1,BTA029041.1,BTA024873.1,BTA025542.1,BTA006056.1,BTA029272.1,BTA…
23896.1,BTA013083.1,BTA012514.1,BTA024430.1,BTA017821.1,BTA014182.1,BTA029707.1,BTA007806.1,BTA027106.1,BTA001466.1,BTA002385.1,BTA008455.1,BTA016708.1,BTA001484.1,BTA016751.1,BTA007269.1,BTA003202.1,BTA006277.2,BTA014333.1,BTA007171.1,BTA024902.1,BTA009040.1,BTA023203.2,BTA009934.2,BTA022388.1,BTA007333.1,BTA004983.1,BTA028685.1,BTA023937.1,BTA029352.1,BTA020878.1,BTA011638.1,BTA022429.1,BTA0290…
GO:0005753	mitochondrial proton-transporting ATP synthase complex	cellular_component	0.16606	1	24	8211	36	14362	BTA009264.1,BTA005669.2,BTA008838.1,BTA020155.1,BTA019450.1,BTA009531.1,BTA018445.1,BTA011358.1;support_id=CUFF48.12.4,BTA006464.1,BTA010679.1,BTA028178.1,BTA003842.1;support_id=CUFF17.464.1,BTA019460.1,BTA006772.1,BTA021534.2;support_id=CUFF89.776.2,BTA007848.1,BTA016180.1,BTA013064.1,BTA025566.1,BTA004882.1,BTA005254.1,BTA014855.1,BTA026401.1,BTA020035.1
GO:0006811	ion transport	biological_process	0.16873	1	474	8211	805	14362	BTA029107.1,BTA016918.1,BTA007643.1,BTA007709.1,BTA008041.1,BTA026190.1,BTA023655.1,BTA015878.1;support_id=CUFF68.52.1,BTA001472.1,BTA020719.1;support_id=CUFF86.420.1,BTA010276.1;support_id=CUFF43.403.2,BTA006925.1,BTA029264.1,BTA011030.1,BTA018475.1,BTA029209.1,BTA000209.1,BTA024039.1,BTA012427.1,BTA029709.1,BTA024634.1,BTA006783.2,BTA011186.2,BTA011737.1,BTA013709.1,BTA026883.1,BTA009008.1,BTA0…
GO:1901617	organic hydroxy compound biosynthetic process	biological_process	0.16912	1	9	8211	12	14362	BTA007899.1,BTA002970.1,BTA028277.1,BTA008316.1,BTA022326.1,BTA004446.1,BTA001872.1,BTA022217.1,BTA026134.1
GO:0031399	regulation of protein modification process	biological_process	0.17067	1	19	8211	28	14362	BTA002147.1;support_id=CUFF9.207.1,BTA000111.1,BTA027828.1,BTA029361.1,BTA005964.1,BTA026859.1,BTA017803.1,BTA022297.1,BTA011625.1,BTA002944.1,BTA002108.1,BTA014842.1,BTA015558.1,BTA018619.1,BTA023874.1,BTA023731.1,BTA019417.1,BTA023873.1,BTA027118.1
GO:0044712	single-organism catabolic process	biological_process	0.17252	1	88	8211	143	14362	BTA028305.1,BTA015072.1,BTA004851.1,BTA008540.1,BTA013293.1,BTA004841.1,BTA008367.1,BTA010671.1,BTA026055.1,BTA018000.1,BTA010938.1,BTA018111.1,BTA026225.1,BTA012723.1,BTA003255.1,BTA025199.1,BTA001319.1,BTA013295.1,BTA010951.1,BTA002988.4,BTA007388.2,BTA022589.4,BTA027828.1,BTA011396.1,BTA000363.1,BTA026299.1,BTA023810.1,BTA020136.1,BTA007004.1,BTA000221.1,BTA010956.1,BTA019814.1,BTA001601.1,BTA…
GO:0004861	cyclin-dependent protein serine/threonine kinase inhibitor activity	molecular_function	0.17308	1	5	8211	6	14362	BTA008132.1,BTA015556.1,BTA027912.1,BTA015555.1,BTA025250.1
GO:0005092	GDP-dissociation inhibitor activity	molecular_function	0.17382	1	3	8211	3	14362	BTA013673.1,BTA006252.1,BTA026071.1
GO:0005094	Rho GDP-dissociation inhibitor activity	molecular_function	0.17382	1	3	8211	3	14362	BTA006252.1,BTA013673.1,BTA026071.1
GO:0015858	nucleoside transport	biological_process	0.17454	1	3	8211	3	14362	BTA025557.1,BTA029375.1,BTA015410.1
GO:0034257	nicotinamide riboside transmembrane transporter activity	molecular_function	0.17454	1	3	8211	3	14362	BTA015410.1,BTA029375.1,BTA025557.1
GO:0034258	nicotinamide riboside transport	biological_process	0.17454	1	3	8211	3	14362	BTA015410.1,BTA029375.1,BTA025557.1
GO:0042765	GPI-anchor transamidase complex	cellular_component	0.17485	1	9	8211	12	14362	BTA010186.1,BTA028693.3,BTA004404.1;support_id=CUFF19.741.1,BTA021414.1,BTA001287.2,BTA009023.1;support_id=CUFF38.344.2,BTA002108.1,BTA005289.1,BTA027117.3
GO:0004408	holocytochrome-c synthase activity	molecular_function	0.17554	1	3	8211	3	14362	BTA000013.1,BTA001396.1,BTA000019.1
GO:0016469	proton-transporting two-sector ATPase complex	cellular_component	0.17622	1	80	8211	130	14362	BTA024967.1,BTA028127.1,BTA011581.1,BTA004775.1,BTA007848.1,BTA014855.1,BTA025566.1,BTA023291.1,BTA004718.1,BTA018679.1,BTA012506.1,BTA009208.1,BTA026401.1,BTA025671.1,BTA002481.1,BTA008838.1,BTA024806.1,BTA001188.2,BTA005419.2,BTA004068.1;support_id=CUFF18.493.1,BTA003842.1;support_id=CUFF17.464.1,BTA010679.1,BTA015453.1,BTA010658.1,BTA015367.1,BTA004882.1,BTA011431.1,BTA027033.1,BTA006777.1,BTA…
GO:0008198	ferrous iron binding	molecular_function	0.17702	1	3	8211	3	14362	BTA015046.1,BTA006638.1,BTA006641.1
GO:0006997	nucleus organization	biological_process	0.17744	1	9	8211	12	14362	BTA027690.1,BTA023255.1,BTA012945.1,BTA003784.1;support_id=CUFF17.316.1,BTA028838.1,BTA014782.1;support_id=CUFF61.626.1,BTA029395.1,BTA026114.1;support_id=CUFF107.558.1,BTA014089.3
GO:0004612	phosphoenolpyruvate carboxykinase (ATP) activity	molecular_function	0.17748	1	3	8211	3	14362	BTA019499.1;support_id=CUFF81.33.1,BTA028750.1,BTA000542.1
GO:0005768	endosome	cellular_component	0.1776	1	9	8211	12	14362	BTA020272.1,BTA002944.1,BTA023731.1,BTA011625.1,BTA005964.1,BTA018619.1,BTA004762.1;support_id=CUFF21.387.1,BTA026859.1,BTA002147.1;support_id=CUFF9.207.1
GO:0044440	endosomal part	cellular_component	0.1776	1	9	8211	12	14362	BTA023731.1,BTA011625.1,BTA020272.1,BTA002944.1,BTA002147.1;support_id=CUFF9.207.1,BTA018619.1,BTA005964.1,BTA026859.1,BTA004762.1;support_id=CUFF21.387.1
GO:0030682	evasion or tolerance of host defense response	biological_process	0.17791	1	7	8211	9	14362	BTA016814.1,BTA018447.1,BTA011942.1,BTA012678.1,BTA019619.1,BTA000481.1,BTA003020.1
GO:0051807	evasion or tolerance of defense response of other organism involved in symbiotic interaction	biological_process	0.17791	1	7	8211	9	14362	BTA011942.1,BTA018447.1,BTA016814.1,BTA000481.1,BTA019619.1,BTA003020.1,BTA012678.1
GO:0005126	cytokine receptor binding	molecular_function	0.17846	1	25	8211	38	14362	BTA028936.1,BTA021074.1;support_id=CUFF87.684.1,BTA010352.1,BTA027527.1,BTA030183.1,BTA002256.1,BTA017992.1;support_id=CUFF75.997.1,BTA007270.1,BTA014047.1,BTA001218.1,BTA006940.1,BTA005481.1,BTA030080.1;support_id=CUFF124.202.1,BTA006694.1,BTA001895.1,BTA014718.1;support_id=CUFF61.485.1,BTA014730.1,BTA011573.1;support_id=CUFF48.497.1,BTA004509.1,BTA026080.1,BTA026728.3,BTA005890.1,BTA005145.1,BT…
GO:0000790	nuclear chromatin	cellular_component	0.17857	1	3	8211	3	14362	BTA000870.1,BTA028691.1,BTA024623.1
GO:0031011	Ino80 complex	cellular_component	0.17857	1	3	8211	3	14362	BTA024623.1,BTA028691.1,BTA000870.1
GO:0097346	INO80-type complex	cellular_component	0.17857	1	3	8211	3	14362	BTA024623.1,BTA028691.1,BTA000870.1
GO:0006313	transposition, DNA-mediated	biological_process	0.17872	1	37	8211	58	14362	BTA028822.1;support_id=CUFF118.205.1,BTA003090.1,BTA020473.1,BTA020585.1,BTA001765.1,BTA013115.1,BTA020324.1;support_id=CUFF84.520.1,BTA007441.1;support_id=CUFF31.446.1,BTA015332.1,BTA029848.1,BTA006277.2;support_id=CUFF27.25.1,BTA015339.1,BTA007206.1,BTA026696.1,BTA020988.1,BTA015115.1,BTA016631.1,BTA013812.1,BTA027677.1,BTA021095.1,BTA007318.1,BTA015723.1,BTA000067.1;support_id=CUFF1.157.1,BTA0…
GO:0032196	transposition	biological_process	0.17872	1	37	8211	58	14362	BTA020967.1,BTA014320.1,BTA029430.1,BTA023759.1,BTA002996.1,BTA015723.1,BTA007318.1,BTA000067.1;support_id=CUFF1.157.1,BTA020207.1,BTA008896.1;support_id=CUFF37.723.2,BTA009887.1;support_id=CUFF42.234.1,BTA002009.1;support_id=CUFF8.431.1,BTA018959.1,BTA029038.1;support_id=CUFF118.867.2,BTA009570.1,BTA008904.1,BTA028685.1,BTA015332.1,BTA020324.1;support_id=CUFF84.520.1,BTA007441.1;support_id=CUFF3…
GO:0019184	nonribosomal peptide biosynthetic process	biological_process	0.17908	1	7	8211	9	14362	BTA019858.1;support_id=CUFF83.17.1,BTA017894.1,BTA007023.1,BTA022077.1,BTA023405.1,BTA028311.1,BTA013757.1
GO:0016852	sirohydrochlorin cobaltochelatase activity	molecular_function	0.17995	1	3	8211	3	14362	BTA027968.1,BTA016313.1,BTA010997.1
GO:0006220	pyrimidine nucleotide metabolic process	biological_process	0.18022	1	17	8211	25	14362	BTA019097.1,BTA010323.1,BTA010170.1,BTA024707.2,BTA022953.1,BTA002013.1,BTA025372.1,BTA023130.1,BTA021666.1,BTA029743.1,BTA027970.1,BTA002736.1,BTA014761.1,BTA025560.1,BTA012188.2,BTA025851.1,BTA019457.2
GO:0070008	serine-type exopeptidase activity	molecular_function	0.1803	1	36	8211	56	14362	BTA019708.1,BTA005284.3,BTA011527.1,BTA025333.1,BTA022815.1,BTA028256.1,BTA018340.1,BTA015349.1,BTA014100.2,BTA009472.1,BTA020475.1,BTA009214.2,BTA027841.1,BTA027820.1,BTA005170.1,BTA028361.1,BTA004190.1,BTA018758.1,BTA018529.1,BTA014847.1,BTA008592.1,BTA026828.1,BTA018509.1,BTA027771.1,BTA029334.1,BTA000414.1,BTA014095.1,BTA016030.1,BTA026824.1,BTA024646.1;support_id=CUFF102.1.1,BTA015168.1,BTA0…
GO:0017046	peptide hormone binding	molecular_function	0.18031	1	3	8211	3	14362	BTA009266.1,BTA028176.1,BTA022145.1
GO:0042562	hormone binding	molecular_function	0.18031	1	3	8211	3	14362	BTA009266.1,BTA028176.1,BTA022145.1
GO:0051424	corticotropin-releasing hormone binding	molecular_function	0.18031	1	3	8211	3	14362	BTA009266.1,BTA028176.1,BTA022145.1
GO:0004664	prephenate dehydratase activity	molecular_function	0.18051	1	3	8211	3	14362	BTA005546.1,BTA007577.1;support_id=CUFF32.152.1,BTA020786.1
GO:0009094	L-phenylalanine biosynthetic process	biological_process	0.18051	1	3	8211	3	14362	BTA005546.1,BTA020786.1,BTA007577.1;support_id=CUFF32.152.1
GO:1902223	erythrose 4-phosphate/phosphoenolpyruvate family amino acid biosynthetic process	biological_process	0.18051	1	3	8211	3	14362	BTA020786.1,BTA007577.1;support_id=CUFF32.152.1,BTA005546.1
GO:0008614	pyridoxine metabolic process	biological_process	0.18074	1	3	8211	3	14362	BTA001872.1,BTA022217.1,BTA022326.1
GO:0008615	pyridoxine biosynthetic process	biological_process	0.18074	1	3	8211	3	14362	BTA001872.1,BTA022217.1,BTA022326.1
GO:1901264	carbohydrate derivative transport	biological_process	0.18081	1	5	8211	6	14362	BTA015410.1,BTA029375.1,BTA003147.1,BTA020008.2,BTA025557.1
GO:0016999	antibiotic metabolic process	biological_process	0.18145	1	3	8211	3	14362	BTA002094.1,BTA009661.1,BTA029394.1
GO:0017000	antibiotic biosynthetic process	biological_process	0.18145	1	3	8211	3	14362	BTA002094.1,BTA009661.1,BTA029394.1
GO:0017144	drug metabolic process	biological_process	0.18145	1	3	8211	3	14362	BTA009661.1,BTA002094.1,BTA029394.1
GO:0006090	pyruvate metabolic process	biological_process	0.18189	1	22	8211	33	14362	BTA000518.1,BTA011219.1,BTA029569.1,BTA013293.1,BTA004841.1,BTA027969.1,BTA018000.1,BTA018016.1,BTA020575.1,BTA018111.1,BTA010938.1,BTA020438.1,BTA030010.1,BTA013295.1,BTA012322.1,BTA010951.1,BTA027927.1,BTA001602.1,BTA022589.4,BTA023498.1,BTA001527.1,BTA024733.1
GO:0008121	ubiquinol-cytochrome-c reductase activity	molecular_function	0.18203	1	12	8211	17	14362	BTA018739.1,BTA017354.1,BTA014058.1,BTA006745.1,BTA019558.1,BTA009487.1,BTA002976.1,BTA014583.1,BTA014292.1,BTA021090.2,BTA027701.1,BTA017933.1
GO:0016681	oxidoreductase activity, acting on diphenols and related substances as donors, cytochrome as acceptor	molecular_function	0.18203	1	12	8211	17	14362	BTA017354.1,BTA018739.1,BTA014058.1,BTA006745.1,BTA014583.1,BTA019558.1,BTA002976.1,BTA009487.1,BTA014292.1,BTA027701.1,BTA017933.1,BTA021090.2
GO:0007172	signal complex assembly	biological_process	0.18209	1	3	8211	3	14362	BTA013211.3,BTA013352.1,BTA015196.2
GO:1902531	regulation of intracellular signal transduction	biological_process	0.1834	1	54	8211	86	14362	BTA010379.1,BTA022666.2,BTA004630.1,BTA017901.1,BTA019934.1,BTA021082.1,BTA012552.1,BTA022079.1,BTA004295.1,BTA009293.1,BTA023501.1,BTA016240.1,BTA023731.1,BTA001940.1,BTA028591.1;support_id=CUFF117.313.1,BTA019417.1,BTA005964.1,BTA001998.1,BTA009866.1,BTA004574.1,BTA007965.1,BTA004687.1,BTA016233.1,BTA026049.1,BTA004676.1,BTA018619.1,BTA028975.1,BTA026025.1,BTA013672.1,BTA016853.1,BTA026048.1,BT…
GO:0042132	fructose 1,6-bisphosphate 1-phosphatase activity	molecular_function	0.18348	1	3	8211	3	14362	BTA000343.1,BTA023769.1,BTA023611.1
GO:0043412	macromolecule modification	biological_process	0.18358	1	553	8211	941	14362	BTA002428.1,BTA021981.1,BTA009250.1,BTA012192.1,BTA023339.1,BTA027587.1,BTA019840.1,BTA000057.1,BTA000796.2,BTA018713.1,BTA004200.1,BTA014367.4,BTA012101.1,BTA025713.1,BTA001194.1,BTA018619.1,BTA026302.1,BTA028246.1,BTA022922.1,BTA000421.1,BTA017975.1,BTA008323.1,BTA006454.1,BTA024038.1,BTA024170.1,BTA006911.1,BTA006912.1,BTA016024.1,BTA024564.1,BTA009466.1,BTA004490.1;support_id=CUFF20.170.2,BTA…
GO:0008013	beta-catenin binding	molecular_function	0.18363	1	5	8211	6	14362	BTA029664.2,BTA018189.1,BTA018190.1,BTA015339.1,BTA009178.1
GO:0015833	peptide transport	biological_process	0.18372	1	3	8211	3	14362	BTA002006.1,BTA026016.1;support_id=CUFF107.343.1,BTA026406.1
GO:0045158	electron transporter, transferring electrons within cytochrome b6/f complex of photosystem II activity	molecular_function	0.18385	1	7	8211	9	14362	BTA006281.1,BTA024027.1,BTA003223.3,BTA017043.1,BTA026297.1,BTA029165.1,BTA023135.1;support_id=CUFF95.537.1
GO:0006047	UDP-N-acetylglucosamine metabolic process	biological_process	0.18403	1	3	8211	3	14362	BTA026986.1,BTA018962.1,BTA014819.1
GO:0015105	arsenite transmembrane transporter activity	molecular_function	0.18409	1	3	8211	3	14362	BTA019047.1,BTA026016.1,BTA007576.2
GO:0015700	arsenite transport	biological_process	0.18409	1	3	8211	3	14362	BTA019047.1,BTA007576.2,BTA026016.1
GO:0051766	inositol trisphosphate kinase activity	molecular_function	0.18419	1	5	8211	6	14362	BTA013934.1,BTA025857.1,BTA002658.1,BTA007359.1,BTA007053.1
GO:0033313	meiotic cell cycle checkpoint	biological_process	0.18426	1	3	8211	3	14362	BTA001369.1,BTA001705.2,BTA007461.1
GO:0040020	regulation of meiotic nuclear division	biological_process	0.18426	1	3	8211	3	14362	BTA007461.1,BTA001369.1,BTA001705.2
GO:0045835	negative regulation of meiotic nuclear division	biological_process	0.18426	1	3	8211	3	14362	BTA007461.1,BTA001705.2,BTA001369.1
GO:0051445	regulation of meiotic cell cycle	biological_process	0.18426	1	3	8211	3	14362	BTA001369.1,BTA001705.2,BTA007461.1
GO:0051447	negative regulation of meiotic cell cycle	biological_process	0.18426	1	3	8211	3	14362	BTA001705.2,BTA001369.1,BTA007461.1
GO:0051598	meiotic recombination checkpoint	biological_process	0.18426	1	3	8211	3	14362	BTA001369.1,BTA001705.2,BTA007461.1
GO:0008272	sulfate transport	biological_process	0.18452	1	14	8211	20	14362	BTA001708.1,BTA028045.1,BTA001779.2,BTA011965.1,BTA016991.1,BTA011969.1,BTA029912.1,BTA011168.1,BTA011169.1,BTA028313.1,BTA007458.1,BTA019817.2,BTA004721.1,BTA015153.2
GO:0015116	sulfate transmembrane transporter activity	molecular_function	0.18452	1	14	8211	20	14362	BTA015153.2,BTA004721.1,BTA007458.1,BTA019817.2,BTA011168.1,BTA011169.1,BTA028313.1,BTA029912.1,BTA011969.1,BTA016991.1,BTA001779.2,BTA028045.1,BTA011965.1,BTA001708.1
GO:0016851	magnesium chelatase activity	molecular_function	0.18486	1	3	8211	3	14362	BTA012257.4,BTA021906.3,BTA010576.3
GO:0051002	ligase activity, forming nitrogen-metal bonds	molecular_function	0.18486	1	3	8211	3	14362	BTA012257.4,BTA021906.3,BTA010576.3
GO:0051003	ligase activity, forming nitrogen-metal bonds, forming coordination complexes	molecular_function	0.18486	1	3	8211	3	14362	BTA021906.3,BTA012257.4,BTA010576.3
GO:0006818	hydrogen transport	biological_process	0.18516	1	88	8211	144	14362	BTA018678.1,BTA007524.1,BTA019503.1,BTA018475.1,BTA019276.1,BTA007709.1,BTA014720.1,BTA026441.1,BTA025211.1,BTA007225.2,BTA020035.1,BTA011737.1,BTA010932.1,BTA013064.1,BTA008317.1,BTA000474.1,BTA008026.1,BTA012427.1,BTA024634.1,BTA013524.1,BTA028178.1,BTA024822.1,BTA006464.1,BTA018445.1,BTA005660.2,BTA006073.1,BTA021977.2,BTA022767.1,BTA024047.1,BTA012553.1,BTA012129.1,BTA005669.2,BTA018494.1,BTA…
GO:0015992	proton transport	biological_process	0.18516	1	88	8211	144	14362	BTA013711.1,BTA029770.1,BTA030038.1,BTA009531.1,BTA011358.1;support_id=CUFF48.12.4,BTA029078.1,BTA028835.1,BTA021703.1,BTA009264.1,BTA004057.1,BTA020155.1,BTA004581.1,BTA011431.1,BTA020955.1,BTA015367.1,BTA004882.1,BTA006777.1,BTA027033.1,BTA010658.1,BTA001188.2,BTA005419.2,BTA010679.1,BTA006311.1;support_id=CUFF27.105.1,BTA015453.1,BTA004068.1;support_id=CUFF18.493.1,BTA003842.1;support_id=CUFF1…
GO:0097196	Shu complex	cellular_component	0.1852	1	3	8211	3	14362	BTA002910.1,BTA000714.1,BTA000711.1
GO:1990391	DNA repair complex	cellular_component	0.1852	1	3	8211	3	14362	BTA002910.1,BTA000714.1,BTA000711.1
GO:0016579	protein deubiquitination	biological_process	0.18587	1	33	8211	51	14362	BTA005661.1,BTA018655.1,BTA002261.4,BTA009305.1,BTA003395.1,BTA010518.1,BTA011911.1,BTA003406.1,BTA016121.1,BTA005235.1;support_id=CUFF22.705.1,BTA020681.1,BTA022468.1,BTA028672.1,BTA014812.1,BTA025989.1,BTA025592.1,BTA003929.1,BTA025713.1,BTA010461.1,BTA007767.1,BTA022730.1,BTA024107.1,BTA001994.1,BTA029382.1,BTA005181.1,BTA021481.1,BTA021664.1,BTA017507.1;support_id=CUFF74.627.2,BTA010529.1,BTA…
GO:0070646	protein modification by small protein removal	biological_process	0.18587	1	33	8211	51	14362	BTA017507.1;support_id=CUFF74.627.2,BTA021664.1,BTA024481.1;support_id=CUFF100.531.1,BTA016236.1,BTA010529.1,BTA000796.2,BTA014771.2,BTA022730.1,BTA010461.1,BTA025713.1,BTA007767.1,BTA005181.1,BTA021481.1,BTA024107.1,BTA001994.1,BTA029382.1,BTA028672.1,BTA014812.1,BTA025989.1,BTA025592.1,BTA003929.1,BTA003395.1,BTA009305.1,BTA005661.1,BTA018655.1,BTA002261.4,BTA022468.1,BTA010518.1,BTA011911.1,BT…
GO:0008238	exopeptidase activity	molecular_function	0.18604	1	67	8211	108	14362	BTA026824.1,BTA018759.1,BTA014095.1,BTA029334.1,BTA010160.1,BTA006464.1,BTA021390.1,BTA003097.1,BTA022223.1,BTA019157.1,BTA028895.1,BTA015168.1,BTA026829.1,BTA021609.1,BTA025333.1,BTA010885.1,BTA020471.1,BTA013026.1,BTA011527.1,BTA020877.1;support_id=CUFF87.109.1,BTA020569.1,BTA009797.1,BTA005284.3,BTA014847.1,BTA018758.1,BTA009214.2,BTA028361.1,BTA027820.1,BTA014100.2,BTA007902.1,BTA028256.1,BTA…
GO:0004556	alpha-amylase activity	molecular_function	0.18615	1	3	8211	3	14362	BTA009752.1,BTA010385.1;support_id=CUFF43.665.2,BTA021955.1;support_id=CUFF92.66.2
GO:0000079	regulation of cyclin-dependent protein serine/threonine kinase activity	biological_process	0.18649	1	3	8211	3	14362	BTA027118.1,BTA014842.1,BTA002108.1
GO:0071900	regulation of protein serine/threonine kinase activity	biological_process	0.18649	1	3	8211	3	14362	BTA027118.1,BTA014842.1,BTA002108.1
GO:1904029	regulation of cyclin-dependent protein kinase activity	biological_process	0.18649	1	3	8211	3	14362	BTA027118.1,BTA002108.1,BTA014842.1
GO:0090066	regulation of anatomical structure size	biological_process	0.18655	1	17	8211	25	14362	BTA004909.1,BTA029602.1,BTA016060.1;support_id=CUFF69.88.2,BTA009197.1;support_id=CUFF39.334.1,BTA012679.1,BTA021474.1,BTA029737.1,BTA009746.2,BTA029531.1,BTA029084.1,BTA011072.1,BTA027151.1,BTA005963.1;support_id=CUFF26.1.1,BTA003196.1,BTA029098.1,BTA011796.1,BTA024785.1;support_id=CUFF102.306.1
GO:0006570	tyrosine metabolic process	biological_process	0.1873	1	5	8211	6	14362	BTA006067.1;support_id=CUFF26.309.1,BTA010671.1,BTA018285.1,BTA020199.1;support_id=CUFF84.171.1,BTA018333.1
GO:0015969	guanosine tetraphosphate metabolic process	biological_process	0.18737	1	3	8211	3	14362	BTA018399.1,BTA022263.1,BTA005584.1
GO:0034035	purine ribonucleoside bisphosphate metabolic process	biological_process	0.18737	1	3	8211	3	14362	BTA022263.1,BTA018399.1,BTA005584.1
GO:0016616	oxidoreductase activity, acting on the CH-OH group of donors, NAD or NADP as acceptor	molecular_function	0.18754	1	121	8211	200	14362	BTA005490.1,BTA028901.1,BTA006928.1,BTA014855.1,BTA010605.1,BTA005973.1,BTA030030.3,BTA009015.1,BTA022002.1,BTA005557.1,BTA027848.1,BTA017246.1,BTA010956.1,BTA000560.1,BTA026265.1;support_id=CUFF108.147.1,BTA013728.1,BTA006136.1,BTA023445.1,BTA022299.1,BTA000505.1,BTA030059.1,BTA012679.1,BTA020712.1,BTA000499.1,BTA007020.1,BTA000656.1,BTA013206.1,BTA013281.1,BTA003848.1;support_id=CUFF17.478.1,BT…
GO:0046700	heterocycle catabolic process	biological_process	0.18767	1	43	8211	68	14362	BTA000687.1,BTA022196.1,BTA001993.1,BTA019013.1,BTA002011.1,BTA008360.1,BTA010956.1,BTA027630.1,BTA000221.1,BTA013410.1,BTA019494.1,BTA019408.1,BTA003560.1,BTA000214.1,BTA020702.2,BTA021860.1,BTA020465.1,BTA001802.1,BTA018743.1,BTA012602.1,BTA018787.1,BTA023447.1,BTA007388.2,BTA010317.1,BTA002872.1,BTA025199.1,BTA007645.1,BTA001319.1,BTA017094.1,BTA024003.1,BTA007170.1,BTA016610.1,BTA017547.1,BTA…
GO:0006720	isoprenoid metabolic process	biological_process	0.1877	1	55	8211	88	14362	BTA021578.1,BTA021411.1,BTA027969.1,BTA000230.1;support_id=CUFF2.165.1,BTA027832.1,BTA006073.1,BTA018339.1,BTA023899.1,BTA007301.1,BTA013454.1,BTA000674.1,BTA015613.1,BTA000515.1,BTA003200.1,BTA018355.1,BTA007906.1,BTA007016.1,BTA009862.1,BTA003154.1,BTA008354.1,BTA006928.1,BTA007907.1,BTA021300.1,BTA000908.1,BTA023455.1,BTA013390.1,BTA027785.1,BTA016527.1,BTA027042.1,BTA020902.1,BTA015558.1,BTA0…
GO:0008299	isoprenoid biosynthetic process	biological_process	0.1877	1	55	8211	88	14362	BTA000908.1,BTA021300.1,BTA006928.1,BTA008354.1,BTA007907.1,BTA027785.1,BTA016527.1,BTA023455.1,BTA013390.1,BTA000515.1,BTA009862.1,BTA003154.1,BTA018355.1,BTA003200.1,BTA007906.1,BTA007016.1,BTA018339.1,BTA006073.1,BTA007301.1,BTA023899.1,BTA015613.1,BTA013454.1,BTA000674.1,BTA021578.1,BTA000230.1;support_id=CUFF2.165.1,BTA027832.1,BTA027969.1,BTA021411.1,BTA005938.1,BTA024535.1,BTA022309.1,BTA0…
GO:0018196	peptidyl-asparagine modification	biological_process	0.18772	1	3	8211	3	14362	BTA019628.2,BTA020620.1,BTA024463.1
GO:0018279	protein N-linked glycosylation via asparagine	biological_process	0.18772	1	3	8211	3	14362	BTA019628.2,BTA020620.1,BTA024463.1
GO:0000228	nuclear chromosome	cellular_component	0.18773	1	59	8211	95	14362	BTA006024.1,BTA030028.1,BTA010279.1,BTA005534.1,BTA018727.1,BTA003585.1,BTA020967.1;support_id=CUFF87.366.1,BTA029464.1,BTA014089.3,BTA000769.1,BTA028691.1,BTA012267.1,BTA004032.1,BTA002147.1;support_id=CUFF9.207.1,BTA029360.1,BTA008904.1;support_id=CUFF37.746.1,BTA011278.1,BTA021829.2;support_id=CUFF90.627.1,BTA008129.2,BTA027329.2,BTA027841.1,BTA026114.1;support_id=CUFF107.558.1,BTA006074.1,BTA…
GO:0009119	ribonucleoside metabolic process	biological_process	0.18798	1	101	8211	166	14362	BTA023625.3,BTA002013.1,BTA027033.1,BTA020955.1,BTA004882.1,BTA010951.1,BTA013295.1,BTA022589.4,BTA011358.1;support_id=CUFF48.12.4,BTA018900.1,BTA021703.1,BTA019450.1,BTA008540.1,BTA011193.1,BTA030038.1,BTA004841.1,BTA009531.1,BTA013293.1,BTA002736.1,BTA004581.1,BTA013225.1,BTA026055.1,BTA018000.1,BTA020155.1,BTA009264.1,BTA010938.1,BTA018111.1,BTA026401.1,BTA018679.1,BTA018399.1,BTA025566.1,BTA0…
GO:0006827	high-affinity iron ion transmembrane transport	biological_process	0.18799	1	3	8211	3	14362	BTA022287.1,BTA011448.1,BTA009037.1
GO:0033573	high-affinity iron permease complex	cellular_component	0.18799	1	3	8211	3	14362	BTA009037.1,BTA022287.1,BTA011448.1
GO:0046906	tetrapyrrole binding	molecular_function	0.18807	1	137	8211	227	14362	BTA021577.1,BTA000317.1,BTA006667.3;support_id=CUFF28.521.2,BTA017161.1,BTA005827.1,BTA016009.1,BTA000670.1,BTA011745.1,BTA010341.1,BTA008548.1;support_id=CUFF36.181.1,BTA003768.1,BTA021419.1,BTA002763.2,BTA018890.2,BTA028520.1,BTA014308.1,BTA003672.1,BTA027535.1,BTA006939.2,BTA009037.1,BTA018575.1,BTA022151.1,BTA029742.1,BTA020319.1,BTA014761.1,BTA028775.1,BTA011868.1,BTA014849.1,BTA027083.1,BTA…
GO:0016301	kinase activity	molecular_function	0.18833	1	387	8211	656	14362	BTA013352.1,BTA027637.3,BTA019709.1,BTA008266.1,BTA018900.1,BTA005803.2,BTA025480.1,BTA000542.1,BTA003509.1,BTA010938.1,BTA018111.1,BTA010079.1;support_id=CUFF42.856.1,BTA023590.1,BTA025921.1,BTA022344.2,BTA004620.1;support_id=CUFF20.433.2,BTA005534.1,BTA002970.1,BTA002021.1;support_id=CUFF8.494.2,BTA018642.1,BTA002538.1,BTA024075.1,BTA018414.1,BTA009751.1,BTA010275.1,BTA021422.2,BTA028542.1,BTA0…
GO:0005813	centrosome	cellular_component	0.18849	1	3	8211	3	14362	BTA019074.1,BTA022093.1,BTA006047.1
GO:0016627	oxidoreductase activity, acting on the CH-CH group of donors	molecular_function	0.18884	1	84	8211	137	14362	BTA004923.1,BTA025620.1;support_id=CUFF105.400.2,BTA029395.1,BTA003357.1,BTA018355.1,BTA017046.1,BTA012257.4,BTA022324.1,BTA007899.1,BTA017774.1,BTA000549.1,BTA023269.1,BTA027870.1,BTA006058.1,BTA027323.1,BTA021857.1,BTA019045.1,BTA003300.1,BTA013708.1,BTA018717.1,BTA028645.1,BTA017248.1,BTA015064.1,BTA020890.1,BTA006020.1,BTA010256.1,BTA027898.1,BTA028244.1,BTA018438.1,BTA003577.1,BTA014798.1,BT…
GO:0010563	negative regulation of phosphorus metabolic process	biological_process	0.18897	1	5	8211	6	14362	BTA015558.1,BTA022297.1,BTA000111.1,BTA023874.1,BTA023873.1
GO:0045936	negative regulation of phosphate metabolic process	biological_process	0.18897	1	5	8211	6	14362	BTA023873.1,BTA023874.1,BTA000111.1,BTA022297.1,BTA015558.1
GO:0022412	cellular process involved in reproduction in multicellular organism	biological_process	0.18897	1	20	8211	30	14362	BTA008534.1,BTA026114.1;support_id=CUFF107.558.1,BTA013650.1,BTA029918.1,BTA020698.1,BTA025375.1,BTA012945.1,BTA003784.1;support_id=CUFF17.316.1,BTA011571.1,BTA014297.1,BTA012946.1;support_id=CUFF54.424.1,BTA014089.3,BTA026573.1,BTA029395.1,BTA021039.1;support_id=CUFF87.585.1,BTA014782.1;support_id=CUFF61.626.1,BTA001309.1,BTA016017.1,BTA011210.1,BTA023255.1
GO:0009295	nucleoid	cellular_component	0.18917	1	7	8211	9	14362	BTA017043.1,BTA017360.1,BTA003223.3,BTA003232.1,BTA014578.1,BTA009375.1,BTA022409.1
GO:0017007	protein-bilin linkage	biological_process	0.1892	1	3	8211	3	14362	BTA002708.1,BTA019306.1,BTA026265.1;support_id=CUFF108.147.1
GO:0017009	protein-phycocyanobilin linkage	biological_process	0.1892	1	3	8211	3	14362	BTA026265.1;support_id=CUFF108.147.1,BTA002708.1,BTA019306.1
GO:0001881	receptor recycling	biological_process	0.18922	1	7	8211	9	14362	BTA002147.1;support_id=CUFF9.207.1,BTA023731.1,BTA011625.1,BTA005964.1,BTA018619.1,BTA026859.1,BTA002944.1
GO:0005770	late endosome	cellular_component	0.18922	1	7	8211	9	14362	BTA018619.1,BTA005964.1,BTA002944.1,BTA026859.1,BTA023731.1,BTA002147.1;support_id=CUFF9.207.1,BTA011625.1
GO:0031902	late endosome membrane	cellular_component	0.18922	1	7	8211	9	14362	BTA011625.1,BTA002147.1;support_id=CUFF9.207.1,BTA023731.1,BTA002944.1,BTA026859.1,BTA005964.1,BTA018619.1
GO:0045121	membrane raft	cellular_component	0.18922	1	7	8211	9	14362	BTA002147.1;support_id=CUFF9.207.1,BTA023731.1,BTA011625.1,BTA005964.1,BTA018619.1,BTA002944.1,BTA026859.1
GO:0071986	Ragulator complex	cellular_component	0.18922	1	7	8211	9	14362	BTA018619.1,BTA005964.1,BTA026859.1,BTA002944.1,BTA002147.1;support_id=CUFF9.207.1,BTA023731.1,BTA011625.1
GO:0046813	receptor-mediated virion attachment to host cell	biological_process	0.18927	1	3	8211	3	14362	BTA007644.1,BTA023383.1,BTA000767.2
GO:0034593	phosphatidylinositol bisphosphate phosphatase activity	molecular_function	0.18932	1	5	8211	6	14362	BTA011171.1,BTA002144.1,BTA026254.1,BTA019553.1,BTA028898.1
GO:0034596	phosphatidylinositol phosphate 4-phosphatase activity	molecular_function	0.18932	1	5	8211	6	14362	BTA028898.1,BTA002144.1,BTA011171.1,BTA019553.1,BTA026254.1
GO:0034597	phosphatidylinositol-4,5-bisphosphate 4-phosphatase activity	molecular_function	0.18932	1	5	8211	6	14362	BTA002144.1,BTA011171.1,BTA019553.1,BTA026254.1,BTA028898.1
GO:0046839	phospholipid dephosphorylation	biological_process	0.18932	1	5	8211	6	14362	BTA002144.1,BTA011171.1,BTA019553.1,BTA026254.1,BTA028898.1
GO:0046856	phosphatidylinositol dephosphorylation	biological_process	0.18932	1	5	8211	6	14362	BTA026254.1,BTA019553.1,BTA011171.1,BTA002144.1,BTA028898.1
GO:0052866	phosphatidylinositol phosphate phosphatase activity	molecular_function	0.18932	1	5	8211	6	14362	BTA028898.1,BTA019553.1,BTA026254.1,BTA002144.1,BTA011171.1
GO:0003810	protein-glutamine gamma-glutamyltransferase activity	molecular_function	0.18944	1	3	8211	3	14362	BTA006912.1,BTA006711.1,BTA006911.1
GO:0018149	peptide cross-linking	biological_process	0.18944	1	3	8211	3	14362	BTA006912.1,BTA006911.1,BTA006711.1
GO:0005786	signal recognition particle, endoplasmic reticulum targeting	cellular_component	0.18973	1	3	8211	3	14362	BTA024732.1,BTA003678.2,BTA004651.1
GO:0030942	endoplasmic reticulum signal peptide binding	molecular_function	0.18973	1	3	8211	3	14362	BTA024732.1,BTA003678.2,BTA004651.1
GO:0030158	protein xylosyltransferase activity	molecular_function	0.19005	1	3	8211	3	14362	BTA000319.1,BTA020426.1,BTA015840.1
GO:0035252	UDP-xylosyltransferase activity	molecular_function	0.19005	1	3	8211	3	14362	BTA020426.1,BTA015840.1,BTA000319.1
GO:0042285	xylosyltransferase activity	molecular_function	0.19005	1	3	8211	3	14362	BTA020426.1,BTA015840.1,BTA000319.1
GO:0032940	secretion by cell	biological_process	0.19009	1	40	8211	63	14362	BTA017543.2,BTA010994.1,BTA027064.1;support_id=CUFF111.431.2,BTA009471.2,BTA018896.1,BTA001615.1,BTA021667.1,BTA020552.1,BTA003546.1,BTA021707.1,BTA011739.1,BTA029918.1,BTA017590.1,BTA023827.1,BTA018069.1;support_id=CUFF76.115.1,BTA010521.1;support_id=CUFF44.309.1,BTA010999.1,BTA030085.1,BTA018490.1,BTA009423.1,BTA012946.1;support_id=CUFF54.424.1,BTA023837.1,BTA025375.1,BTA028523.1,BTA005229.1,BT…
GO:0008217	regulation of blood pressure	biological_process	0.19012	1	3	8211	3	14362	BTA009197.1;support_id=CUFF39.334.1,BTA016060.1;support_id=CUFF69.88.2,BTA029602.1
GO:0042311	vasodilation	biological_process	0.19012	1	3	8211	3	14362	BTA009197.1;support_id=CUFF39.334.1,BTA016060.1;support_id=CUFF69.88.2,BTA029602.1
GO:0042312	regulation of vasodilation	biological_process	0.19012	1	3	8211	3	14362	BTA029602.1,BTA016060.1;support_id=CUFF69.88.2,BTA009197.1;support_id=CUFF39.334.1
GO:0042816	vitamin B6 metabolic process	biological_process	0.19012	1	5	8211	6	14362	BTA028277.1,BTA022326.1,BTA007899.1,BTA022217.1,BTA001872.1
GO:0042819	vitamin B6 biosynthetic process	biological_process	0.19012	1	5	8211	6	14362	BTA028277.1,BTA001872.1,BTA022217.1,BTA022326.1,BTA007899.1
GO:0008810	cellulase activity	molecular_function	0.19041	1	3	8211	3	14362	BTA022209.1,BTA017428.1,BTA022030.1
GO:0034755	iron ion transmembrane transport	biological_process	0.19054	1	5	8211	6	14362	BTA011448.1,BTA002358.1,BTA022287.1,BTA024489.1,BTA009037.1
GO:0002218	activation of innate immune response	biological_process	0.19057	1	3	8211	3	14362	BTA028038.1,BTA007657.1,BTA020825.2
GO:0031349	positive regulation of defense response	biological_process	0.19057	1	3	8211	3	14362	BTA028038.1,BTA007657.1,BTA020825.2
GO:0032479	regulation of type I interferon production	biological_process	0.19057	1	3	8211	3	14362	BTA007657.1,BTA020825.2,BTA028038.1
GO:0032481	positive regulation of type I interferon production	biological_process	0.19057	1	3	8211	3	14362	BTA007657.1,BTA020825.2,BTA028038.1
GO:0032606	type I interferon production	biological_process	0.19057	1	3	8211	3	14362	BTA007657.1,BTA020825.2,BTA028038.1
GO:0045089	positive regulation of innate immune response	biological_process	0.19057	1	3	8211	3	14362	BTA028038.1,BTA007657.1,BTA020825.2
GO:0016860	intramolecular oxidoreductase activity	molecular_function	0.1906	1	12	8211	17	14362	BTA025284.1,BTA026578.1,BTA011219.1,BTA000518.1,BTA001940.1,BTA004841.1,BTA013293.1,BTA021858.1,BTA025864.1,BTA001310.1,BTA013295.1,BTA024733.1
GO:0006848	pyruvate transport	biological_process	0.19062	1	3	8211	3	14362	BTA003068.1;support_id=CUFF13.29.1,BTA011186.2,BTA000460.1
GO:0006850	mitochondrial pyruvate transport	biological_process	0.19062	1	3	8211	3	14362	BTA000460.1,BTA011186.2,BTA003068.1;support_id=CUFF13.29.1
GO:0031225	anchored component of membrane	cellular_component	0.19062	1	3	8211	3	14362	BTA010859.2,BTA006445.1,BTA020866.1
GO:0030515	snoRNA binding	molecular_function	0.19095	1	3	8211	3	14362	BTA005197.1;support_id=CUFF22.573.2,BTA014876.1,BTA014881.1
GO:0072588	box H/ACA RNP complex	cellular_component	0.19095	1	3	8211	3	14362	BTA014881.1,BTA014876.1,BTA005197.1;support_id=CUFF22.573.2
GO:0070009	serine-type aminopeptidase activity	molecular_function	0.19097	1	5	8211	6	14362	BTA027771.1,BTA018340.1,BTA027841.1,BTA022223.1,BTA028361.1
GO:0001906	cell killing	biological_process	0.19137	1	12	8211	17	14362	BTA014915.1,BTA003359.1,BTA024835.2,BTA027640.1,BTA017481.1,BTA001721.1;support_id=CUFF6.298.1,BTA006023.1,BTA026809.1,BTA003441.1,BTA018368.1,BTA026265.1;support_id=CUFF108.147.1,BTA027176.1
GO:0008108	UDP-glucose:hexose-1-phosphate uridylyltransferase activity	molecular_function	0.19139	1	3	8211	3	14362	BTA027966.1,BTA016989.1;support_id=CUFF73.89.1,BTA006865.1;support_id=CUFF29.338.1
GO:0010923	negative regulation of phosphatase activity	biological_process	0.1914	1	3	8211	3	14362	BTA023874.1,BTA023873.1,BTA022297.1
GO:0035305	negative regulation of dephosphorylation	biological_process	0.1914	1	3	8211	3	14362	BTA023874.1,BTA023873.1,BTA022297.1
GO:0035308	negative regulation of protein dephosphorylation	biological_process	0.1914	1	3	8211	3	14362	BTA023874.1,BTA023873.1,BTA022297.1
GO:0032039	integrator complex	cellular_component	0.19142	1	3	8211	3	14362	BTA006398.1,BTA014562.1,BTA002752.1
GO:0004645	phosphorylase activity	molecular_function	0.19142	1	3	8211	3	14362	BTA024445.1;support_id=CUFF100.445.1,BTA003478.1,BTA029580.1;support_id=CUFF121.411.1
GO:0008184	glycogen phosphorylase activity	molecular_function	0.19142	1	3	8211	3	14362	BTA003478.1,BTA024445.1;support_id=CUFF100.445.1,BTA029580.1;support_id=CUFF121.411.1
GO:0020012	evasion or tolerance of host immune response	biological_process	0.19142	1	3	8211	3	14362	BTA018447.1,BTA011942.1,BTA016814.1
GO:0046556	alpha-L-arabinofuranosidase activity	molecular_function	0.19142	1	3	8211	3	14362	BTA027388.3,BTA025946.1,BTA018121.1
GO:0051805	evasion or tolerance of immune response of other organism involved in symbiotic interaction	biological_process	0.19142	1	3	8211	3	14362	BTA016814.1,BTA018447.1,BTA011942.1
GO:0052564	response to immune response of other organism involved in symbiotic interaction	biological_process	0.19142	1	3	8211	3	14362	BTA018447.1,BTA011942.1,BTA016814.1
GO:0052572	response to host immune response	biological_process	0.19142	1	3	8211	3	14362	BTA011942.1,BTA018447.1,BTA016814.1
GO:0072519	parasitism	biological_process	0.19142	1	3	8211	3	14362	BTA003851.1,BTA023026.1,BTA000335.1
GO:0002115	store-operated calcium entry	biological_process	0.19166	1	5	8211	6	14362	BTA014562.1,BTA019460.1,BTA010658.1,BTA028046.1,BTA024485.2
GO:0051924	regulation of calcium ion transport	biological_process	0.19166	1	5	8211	6	14362	BTA010658.1,BTA014562.1,BTA019460.1,BTA024485.2,BTA028046.1
GO:2001256	regulation of store-operated calcium entry	biological_process	0.19166	1	5	8211	6	14362	BTA028046.1,BTA024485.2,BTA014562.1,BTA019460.1,BTA010658.1
GO:0005985	sucrose metabolic process	biological_process	0.19231	1	5	8211	6	14362	BTA017163.1,BTA022684.1,BTA010487.1,BTA007659.1,BTA023266.1
GO:0051187	cofactor catabolic process	biological_process	0.19243	1	12	8211	17	14362	BTA001319.1,BTA011256.1,BTA008540.1,BTA010956.1,BTA000687.1,BTA018743.1,BTA007388.2,BTA026055.1,BTA008367.1,BTA023144.1,BTA023447.1,BTA001993.1
GO:0008171	O-methyltransferase activity	molecular_function	0.19245	1	34	8211	53	14362	BTA028880.1,BTA016319.1,BTA010891.1,BTA019053.1,BTA017005.1,BTA002147.1;support_id=CUFF9.207.1,BTA019657.1,BTA011527.1,BTA018410.1,BTA029954.2,BTA011383.1,BTA015349.1,BTA006756.1,BTA016347.1,BTA024710.1,BTA019428.2,BTA012895.1,BTA011800.1,BTA007161.1,BTA004819.1,BTA000155.1,BTA016779.1,BTA015753.1,BTA023385.1,BTA004672.1,BTA018116.1,BTA020711.1,BTA030058.1,BTA012890.1,BTA023410.1,BTA027242.1,BTA0…
GO:0009306	protein secretion	biological_process	0.19315	1	20	8211	30	14362	BTA025480.1,BTA017590.1,BTA023827.1,BTA015643.1,BTA023837.1,BTA017543.2,BTA009471.2,BTA028954.1,BTA021667.1,BTA021707.1,BTA003546.1,BTA020552.1,BTA011649.1,BTA003893.1,BTA025915.1,BTA009423.1,BTA007806.1,BTA022072.1,BTA030085.1,BTA019284.1
GO:0009617	response to bacterium	biological_process	0.19363	1	23	8211	35	14362	BTA005145.1,BTA029331.1,BTA029270.2,BTA003046.3,BTA026458.3,BTA007556.1,BTA006830.1,BTA004745.1,BTA005650.1;support_id=CUFF24.628.1,BTA007170.1,BTA026325.4,BTA009037.1,BTA014355.1,BTA010451.1;support_id=CUFF44.134.2,BTA029089.1,BTA020757.1,BTA026135.1,BTA024645.1,BTA000266.1,BTA007835.1,BTA000983.1;support_id=CUFF3.862.1,BTA026114.1;support_id=CUFF107.558.1,BTA021589.1
GO:0042742	defense response to bacterium	biological_process	0.19363	1	23	8211	35	14362	BTA009037.1,BTA014355.1,BTA026325.4,BTA010451.1;support_id=CUFF44.134.2,BTA020757.1,BTA029089.1,BTA026135.1,BTA000266.1,BTA007835.1,BTA024645.1,BTA021589.1,BTA026114.1;support_id=CUFF107.558.1,BTA000983.1;support_id=CUFF3.862.1,BTA029331.1,BTA029270.2,BTA003046.3,BTA005145.1,BTA026458.3,BTA006830.1,BTA007556.1,BTA005650.1;support_id=CUFF24.628.1,BTA004745.1,BTA007170.1
GO:0051321	meiotic cell cycle	biological_process	0.19485	1	15	8211	22	14362	BTA028163.1,BTA008564.1,BTA003294.1,BTA007461.1,BTA025519.1,BTA001369.1,BTA020585.1,BTA013115.1,BTA001705.2,BTA018819.1,BTA012260.1;support_id=CUFF51.491.2,BTA029852.1,BTA008031.1,BTA015723.1,BTA003881.1
GO:0004930	G-protein coupled receptor activity	molecular_function	0.1951	1	96	8211	158	14362	BTA000214.1,BTA022763.1,BTA019052.1,BTA000977.1,BTA026530.1,BTA020553.1,BTA012779.1,BTA000808.1,BTA014694.1,BTA023638.1,BTA009207.1,BTA002117.1,BTA012943.1,BTA013941.1,BTA021471.1;support_id=CUFF89.562.1,BTA026758.1,BTA020719.1;support_id=CUFF86.420.1,BTA027021.2,BTA013542.1,BTA015216.1,BTA017060.1,BTA020482.5,BTA006175.1,BTA022400.2;support_id=CUFF93.91.1,BTA011986.1,BTA004014.1,BTA019055.1,BTA0…
GO:0022904	respiratory electron transport chain	biological_process	0.19511	1	23	8211	35	14362	BTA013665.1,BTA013611.1,BTA000827.1,BTA009082.1,BTA023625.3,BTA006866.2,BTA017172.1,BTA003292.1,BTA002147.1;support_id=CUFF9.207.1,BTA009447.1,BTA017267.1,BTA026063.1,BTA008540.1,BTA029929.1,BTA011193.1,BTA001571.2,BTA003117.1,BTA017353.1,BTA018185.1,BTA018319.1,BTA013656.1,BTA017043.1,BTA026055.1
GO:0070588	calcium ion transmembrane transport	biological_process	0.19578	1	5	8211	6	14362	BTA002708.1,BTA001407.1,BTA027704.2,BTA029122.3,BTA012852.1
GO:0010927	cellular component assembly involved in morphogenesis	biological_process	0.19587	1	5	8211	6	14362	BTA003530.1,BTA012353.1;support_id=CUFF52.61.1,BTA006047.1,BTA025651.1,BTA024840.4
GO:0042384	cilium assembly	biological_process	0.19587	1	5	8211	6	14362	BTA025651.1,BTA006047.1,BTA012353.1;support_id=CUFF52.61.1,BTA003530.1,BTA024840.4
GO:0060271	cilium morphogenesis	biological_process	0.19587	1	5	8211	6	14362	BTA003530.1,BTA012353.1;support_id=CUFF52.61.1,BTA006047.1,BTA025651.1,BTA024840.4
GO:0034464	BBSome	cellular_component	0.19638	1	5	8211	6	14362	BTA027350.1,BTA012353.1;support_id=CUFF52.61.1,BTA003530.1,BTA024840.4,BTA022778.1
GO:0008455	alpha-1,6-mannosylglycoprotein 2-beta-N-acetylglucosaminyltransferase activity	molecular_function	0.19667	1	5	8211	6	14362	BTA011916.2,BTA001159.1,BTA013422.1,BTA012529.2,BTA000986.1
GO:0008645	hexose transport	biological_process	0.19702	1	5	8211	6	14362	BTA002626.1,BTA022391.3,BTA021967.3,BTA015301.1,BTA015627.1
GO:0015749	monosaccharide transport	biological_process	0.19702	1	5	8211	6	14362	BTA015627.1,BTA015301.1,BTA021967.3,BTA022391.3,BTA002626.1
GO:0015232	heme transporter activity	molecular_function	0.19759	1	5	8211	6	14362	BTA015080.1,BTA022640.1;support_id=CUFF94.12.1,BTA002059.1,BTA014310.1;support_id=CUFF60.6.1,BTA000202.1;support_id=CUFF2.64.1
GO:0043547	positive regulation of GTPase activity	biological_process	0.19783	1	5	8211	6	14362	BTA010971.1,BTA013731.1,BTA004295.1,BTA020360.1,BTA017901.1
GO:0005179	hormone activity	molecular_function	0.19794	1	47	8211	75	14362	BTA029279.1,BTA024831.2,BTA017116.1;support_id=CUFF73.378.1,BTA026817.3,BTA001705.2,BTA016410.1,BTA009410.1,BTA017175.1,BTA021391.1,BTA003566.1,BTA005342.1,BTA001707.1,BTA019489.1,BTA014310.1;support_id=CUFF60.6.1,BTA022927.1,BTA021639.1;support_id=CUFF90.178.1,BTA010479.1,BTA007461.1,BTA001470.1,BTA019193.1,BTA008123.3,BTA013711.1,BTA009197.1;support_id=CUFF39.334.1,BTA013354.1,BTA010823.1;suppo…
GO:0015171	amino acid transmembrane transporter activity	molecular_function	0.19901	1	20	8211	30	14362	BTA028838.1,BTA019245.1,BTA014848.2,BTA017256.1,BTA004007.1,BTA003629.1,BTA029883.1,BTA023639.1,BTA014963.1,BTA018666.1,BTA023399.1,BTA023660.1,BTA021509.1,BTA019668.1,BTA006783.2,BTA026193.1,BTA018661.1,BTA028537.1,BTA022352.1,BTA021661.1
GO:0016705	oxidoreductase activity, acting on paired donors, with incorporation or reduction of molecular oxygen	molecular_function	0.20139	1	162	8211	270	14362	BTA023134.1,BTA001219.1,BTA023543.1,BTA011870.3,BTA012514.1,BTA021418.1,BTA009804.1,BTA011446.1,BTA018320.1,BTA003509.1,BTA003274.4,BTA010504.1,BTA018286.1,BTA010989.1,BTA009040.1,BTA003273.1,BTA029613.1,BTA021385.1,BTA003202.1,BTA021422.2,BTA025209.1,BTA005938.1,BTA000684.1,BTA009321.1,BTA001217.1,BTA027797.1,BTA010503.2;support_id=CUFF44.257.2,BTA023899.1,BTA011448.1,BTA030100.1,BTA011518.1,BTA…
GO:0004672	protein kinase activity	molecular_function	0.20177	1	246	8211	414	14362	BTA018814.1,BTA001350.1,BTA029326.1,BTA016508.1,BTA028259.1,BTA002419.1,BTA015040.1,BTA013157.2,BTA000370.1,BTA019985.1,BTA021939.1,BTA000265.1,BTA024969.1,BTA006609.1;support_id=CUFF28.362.2,BTA029383.1,BTA017618.1,BTA029146.1,BTA022572.1,BTA023801.1,BTA013491.2,BTA014695.1,BTA012275.1,BTA029077.1,BTA017576.1,BTA024950.1,BTA023139.1,BTA007979.1,BTA022470.1,BTA010664.1,BTA020938.1,BTA003508.1,BTA…
GO:0008855	exodeoxyribonuclease VII activity	molecular_function	0.20187	1	32	8211	50	14362	BTA019494.1,BTA007192.1,BTA002481.1,BTA002256.1,BTA009321.1,BTA013410.1,BTA019206.1,BTA000266.1,BTA009135.1,BTA020702.2,BTA026228.1,BTA013748.1;support_id=CUFF57.390.1,BTA029091.1,BTA024483.1,BTA024401.1,BTA006078.1,BTA018130.1;support_id=CUFF76.210.4,BTA004718.1,BTA028523.1,BTA020757.1,BTA020771.1,BTA003071.1,BTA028368.1,BTA001364.1,BTA020534.1,BTA004032.1,BTA026851.1,BTA022487.1,BTA010658.1,BTA…
GO:0016769	transferase activity, transferring nitrogenous groups	molecular_function	0.20525	1	15	8211	22	14362	BTA026174.1,BTA004871.1,BTA004995.1,BTA022657.1,BTA027882.1,BTA004814.1,BTA025764.1,BTA029254.1,BTA016343.1,BTA027906.1,BTA016318.1,BTA023651.1,BTA011242.1,BTA027872.1,BTA022217.1
GO:0030054	cell junction	cellular_component	0.20621	1	18	8211	27	14362	BTA020770.1;support_id=CUFF86.544.1,BTA029603.1,BTA010121.1,BTA000070.2,BTA000409.3,BTA015410.1,BTA025038.1,BTA000443.2,BTA011932.1,BTA023582.1,BTA026280.1,BTA014291.1,BTA029375.1,BTA013352.1,BTA012456.1,BTA020400.1,BTA013211.3,BTA015196.2
GO:0016788	hydrolase activity, acting on ester bonds	molecular_function	0.20622	1	454	8211	773	14362	BTA003128.1,BTA028152.1,BTA019531.1,BTA000705.1,BTA021189.1,BTA007419.1,BTA013410.1,BTA019206.1,BTA030183.1,BTA004728.1,BTA002264.1,BTA004312.1,BTA013720.1;support_id=CUFF57.334.1,BTA025327.4,BTA009554.1;support_id=CUFF41.186.1,BTA011326.1,BTA026442.1,BTA019747.1,BTA008896.1;support_id=CUFF37.723.2,BTA010586.1,BTA009805.1,BTA003200.1,BTA001993.1,BTA013748.1;support_id=CUFF57.390.1,BTA004291.1,BTA…
GO:0000723	telomere maintenance	biological_process	0.20669	1	26	8211	40	14362	BTA002942.1,BTA021398.1,BTA012396.1,BTA026648.1,BTA028573.3,BTA003128.1,BTA019408.1,BTA013336.2,BTA025713.1,BTA013344.1,BTA006686.1,BTA015059.1,BTA018655.1,BTA010165.1,BTA024075.1,BTA002094.1,BTA004618.1,BTA019199.1,BTA004404.1;support_id=CUFF19.741.1,BTA025592.1,BTA016946.1,BTA021664.1,BTA027826.1,BTA018676.1,BTA026019.1,BTA003623.1
GO:0032200	telomere organization	biological_process	0.20669	1	26	8211	40	14362	BTA004404.1;support_id=CUFF19.741.1,BTA019199.1,BTA004618.1,BTA016946.1,BTA025592.1,BTA024075.1,BTA002094.1,BTA018676.1,BTA026019.1,BTA021664.1,BTA027826.1,BTA003623.1,BTA028573.3,BTA026648.1,BTA021398.1,BTA002942.1,BTA012396.1,BTA025713.1,BTA010165.1,BTA006686.1,BTA018655.1,BTA015059.1,BTA013344.1,BTA003128.1,BTA019408.1,BTA013336.2
GO:0060249	anatomical structure homeostasis	biological_process	0.20669	1	26	8211	40	14362	BTA003623.1,BTA018676.1,BTA026019.1,BTA027826.1,BTA021664.1,BTA002094.1,BTA024075.1,BTA016946.1,BTA025592.1,BTA004404.1;support_id=CUFF19.741.1,BTA004618.1,BTA019199.1,BTA019408.1,BTA013336.2,BTA003128.1,BTA010165.1,BTA006686.1,BTA013344.1,BTA015059.1,BTA018655.1,BTA025713.1,BTA012396.1,BTA021398.1,BTA002942.1,BTA028573.3,BTA026648.1
GO:0072525	pyridine-containing compound biosynthetic process	biological_process	0.20724	1	18	8211	27	14362	BTA020661.1,BTA028277.1,BTA001197.1,BTA007899.1,BTA004831.1,BTA000506.1,BTA001527.1,BTA022326.1,BTA023447.1,BTA020949.1,BTA007219.2,BTA018372.1,BTA010938.1,BTA020941.1,BTA021924.1,BTA001872.1,BTA008367.1,BTA022217.1
GO:0010638	positive regulation of organelle organization	biological_process	0.20725	1	15	8211	22	14362	BTA010292.1,BTA011643.1,BTA010479.1,BTA005963.1;support_id=CUFF26.1.1,BTA004909.1,BTA011072.1,BTA002340.1,BTA011285.1,BTA024785.1;support_id=CUFF102.306.1,BTA013283.1,BTA019868.1,BTA029531.1,BTA007215.1,BTA009746.2,BTA003196.1
GO:0031334	positive regulation of protein complex assembly	biological_process	0.20725	1	15	8211	22	14362	BTA029531.1,BTA019868.1,BTA009746.2,BTA007215.1,BTA003196.1,BTA002340.1,BTA011072.1,BTA011285.1,BTA024785.1;support_id=CUFF102.306.1,BTA013283.1,BTA011643.1,BTA010479.1,BTA005963.1;support_id=CUFF26.1.1,BTA004909.1,BTA010292.1
GO:0032273	positive regulation of protein polymerization	biological_process	0.20725	1	15	8211	22	14362	BTA019868.1,BTA029531.1,BTA007215.1,BTA009746.2,BTA003196.1,BTA002340.1,BTA011072.1,BTA011285.1,BTA024785.1;support_id=CUFF102.306.1,BTA013283.1,BTA011643.1,BTA005963.1;support_id=CUFF26.1.1,BTA010479.1,BTA004909.1,BTA010292.1
GO:0044089	positive regulation of cellular component biogenesis	biological_process	0.20725	1	15	8211	22	14362	BTA004909.1,BTA011643.1,BTA010479.1,BTA005963.1;support_id=CUFF26.1.1,BTA010292.1,BTA003196.1,BTA019868.1,BTA029531.1,BTA007215.1,BTA009746.2,BTA013283.1,BTA002340.1,BTA011072.1,BTA024785.1;support_id=CUFF102.306.1,BTA011285.1
GO:0051495	positive regulation of cytoskeleton organization	biological_process	0.20725	1	15	8211	22	14362	BTA024785.1;support_id=CUFF102.306.1,BTA011285.1,BTA011072.1,BTA002340.1,BTA013283.1,BTA009746.2,BTA007215.1,BTA019868.1,BTA029531.1,BTA003196.1,BTA010292.1,BTA010479.1,BTA005963.1;support_id=CUFF26.1.1,BTA011643.1,BTA004909.1
GO:0008174	mRNA methyltransferase activity	molecular_function	0.2081	1	10	8211	14	14362	BTA015349.1,BTA007334.1,BTA003671.1,BTA022999.1,BTA021525.1,BTA011527.1,BTA002405.1,BTA002035.1,BTA012794.1,BTA022998.1
GO:0015629	actin cytoskeleton	cellular_component	0.20828	1	38	8211	60	14362	BTA024483.1,BTA004909.1,BTA029531.1,BTA007677.1,BTA016314.2,BTA022538.1,BTA011072.1,BTA015273.1,BTA005963.1;support_id=CUFF26.1.1,BTA007672.1,BTA027151.1,BTA010606.2,BTA023292.1,BTA021341.1,BTA005958.1,BTA023814.1,BTA024785.1;support_id=CUFF102.306.1,BTA012566.1,BTA004142.1,BTA009536.1,BTA024032.1,BTA011796.1,BTA025041.1,BTA021937.1,BTA021474.1,BTA015287.1,BTA023801.1,BTA009746.2,BTA003886.2,BTA0…
GO:0051186	cofactor metabolic process	biological_process	0.20956	1	131	8211	218	14362	BTA001993.1,BTA001602.1,BTA024597.1,BTA020438.1,BTA022324.1,BTA004572.1,BTA017774.1,BTA030010.1,BTA018016.1,BTA027323.1,BTA021924.1,BTA027230.3,BTA020575.1,BTA000518.1,BTA011219.1,BTA029569.1,BTA027184.1,BTA015064.1,BTA023447.1,BTA010212.1,BTA006592.1,BTA018438.1,BTA012314.1,BTA000741.2,BTA019786.1,BTA003577.1,BTA014798.1,BTA023319.1,BTA021906.3,BTA023680.1,BTA023144.1,BTA029898.1,BTA022288.1,BTA…
GO:0044179	hemolysis in other organism	biological_process	0.21179	1	10	8211	14	14362	BTA014915.1,BTA003359.1,BTA024835.2,BTA027640.1,BTA017481.1,BTA001721.1;support_id=CUFF6.298.1,BTA006023.1,BTA026809.1,BTA003441.1,BTA018368.1
GO:0051715	cytolysis in other organism	biological_process	0.21179	1	10	8211	14	14362	BTA014915.1,BTA003359.1,BTA024835.2,BTA017481.1,BTA001721.1;support_id=CUFF6.298.1,BTA027640.1,BTA018368.1,BTA006023.1,BTA026809.1,BTA003441.1
GO:0006787	porphyrin-containing compound catabolic process	biological_process	0.21184	1	10	8211	14	14362	BTA018743.1,BTA000687.1,BTA023144.1,BTA001993.1,BTA007388.2,BTA026055.1,BTA008540.1,BTA001319.1,BTA011256.1,BTA010956.1
GO:0033015	tetrapyrrole catabolic process	biological_process	0.21184	1	10	8211	14	14362	BTA008540.1,BTA011256.1,BTA001319.1,BTA010956.1,BTA018743.1,BTA000687.1,BTA001993.1,BTA023144.1,BTA026055.1,BTA007388.2
GO:0044033	multi-organism metabolic process	biological_process	0.21233	1	10	8211	14	14362	BTA019459.1,BTA018535.1,BTA017191.1,BTA024646.1;support_id=CUFF102.1.1,BTA018955.2,BTA020082.1,BTA019159.1,BTA007235.1,BTA018130.1;support_id=CUFF76.210.4,BTA027841.1
GO:0042278	purine nucleoside metabolic process	biological_process	0.21256	1	94	8211	155	14362	BTA011581.1,BTA000505.1,BTA013968.1,BTA007848.1,BTA027927.1,BTA023498.1,BTA001527.1,BTA018679.1,BTA026401.1,BTA014855.1,BTA025566.1,BTA018399.1,BTA008838.1,BTA018303.1,BTA000221.1,BTA023379.1,BTA003842.1;support_id=CUFF17.464.1,BTA010679.1,BTA001571.2,BTA013295.1,BTA010951.1,BTA022589.4,BTA027033.1,BTA002013.1,BTA023625.3,BTA004882.1,BTA020955.1,BTA020155.1,BTA026055.1,BTA018000.1,BTA004581.1,BTA…
GO:0046128	purine ribonucleoside metabolic process	biological_process	0.21256	1	94	8211	155	14362	BTA027927.1,BTA023498.1,BTA001527.1,BTA011581.1,BTA000505.1,BTA013968.1,BTA007848.1,BTA014855.1,BTA025566.1,BTA018399.1,BTA018679.1,BTA026401.1,BTA000221.1,BTA023379.1,BTA008838.1,BTA018303.1,BTA003842.1;support_id=CUFF17.464.1,BTA010679.1,BTA001571.2,BTA022589.4,BTA013295.1,BTA010951.1,BTA004882.1,BTA020955.1,BTA027033.1,BTA002013.1,BTA023625.3,BTA018111.1,BTA010938.1,BTA009264.1,BTA020155.1,BTA…
GO:0008270	zinc ion binding	molecular_function	0.21259	1	540	8211	922	14362	BTA017543.2,BTA024646.1;support_id=CUFF102.1.1,BTA001692.1,BTA025998.2,BTA029561.1,BTA027659.3,BTA020701.1;support_id=CUFF86.373.1,BTA029918.1,BTA023822.1,BTA028606.1,BTA023507.1,BTA000749.1,BTA005621.1;support_id=CUFF24.571.1,BTA014305.1,BTA015002.1,BTA007430.1,BTA002094.1,BTA028476.1,BTA026035.1,BTA002354.1,BTA011689.1,BTA012193.1,BTA020534.1,BTA021509.1,BTA024049.3,BTA026698.2,BTA003699.1,BTA0…
GO:0000276	mitochondrial proton-transporting ATP synthase complex, coupling factor F(o)	cellular_component	0.21431	1	18	8211	27	14362	BTA020035.1,BTA026401.1,BTA013064.1,BTA014855.1,BTA005254.1,BTA004882.1,BTA016180.1,BTA006772.1,BTA010679.1,BTA011358.1;support_id=CUFF48.12.4,BTA006464.1,BTA018445.1,BTA028178.1,BTA003842.1;support_id=CUFF17.464.1,BTA009531.1,BTA020155.1,BTA005669.2,BTA009264.1
GO:0019773	proteasome core complex, alpha-subunit complex	cellular_component	0.21502	1	8	8211	11	14362	BTA027547.1,BTA005813.1,BTA023259.1,BTA020149.1,BTA004314.2,BTA014244.1,BTA027569.1,BTA013400.1
GO:0032993	protein-DNA complex	cellular_component	0.21518	1	10	8211	14	14362	BTA000844.1,BTA003814.2,BTA028744.1;support_id=CUFF117.740.2,BTA001244.1,BTA002147.1;support_id=CUFF9.207.1,BTA023627.1;support_id=CUFF97.322.1,BTA014118.1,BTA021199.1,BTA005961.1,BTA026719.2
GO:0044433	cytoplasmic vesicle part	cellular_component	0.21735	1	39	8211	62	14362	BTA002761.1,BTA011438.1,BTA002519.1,BTA010277.1,BTA027426.1,BTA029261.1;support_id=CUFF119.484.3,BTA027338.1,BTA017518.1,BTA024826.3,BTA027678.1,BTA016737.1,BTA003619.1,BTA022916.1,BTA000946.1,BTA030126.1,BTA019785.1;support_id=CUFF82.119.2,BTA028848.1;support_id=CUFF118.317.2,BTA003933.1,BTA012508.1,BTA009557.1,BTA028770.1,BTA008635.1,BTA023521.1,BTA011591.1,BTA005950.1,BTA005418.1,BTA007279.1,B…
GO:0001522	pseudouridine synthesis	biological_process	0.21745	1	18	8211	27	14362	BTA006779.1,BTA021526.1,BTA021199.1,BTA018663.1,BTA009818.1,BTA021673.1,BTA026860.2,BTA000230.1,BTA005197.1;support_id=CUFF22.573.2,BTA005534.1,BTA001895.1,BTA014293.1,BTA012793.1,BTA027191.1,BTA006445.1,BTA003814.2,BTA014881.1,BTA014876.1
GO:0004529	exodeoxyribonuclease activity	molecular_function	0.21896	1	33	8211	52	14362	BTA020757.1,BTA028523.1,BTA011881.1,BTA000813.1,BTA010658.1,BTA022487.1,BTA003076.1,BTA004032.1,BTA020534.1,BTA026851.1,BTA003071.1,BTA001364.1,BTA028368.1,BTA020771.1,BTA026442.1,BTA000266.1,BTA009135.1,BTA020702.2,BTA013410.1,BTA009321.1,BTA002256.1,BTA019206.1,BTA002481.1,BTA007192.1,BTA019494.1,BTA018130.1;support_id=CUFF76.210.4,BTA004718.1,BTA006078.1,BTA024401.1,BTA029091.1,BTA024483.1,BTA…
GO:0016895	exodeoxyribonuclease activity, producing 5'-phosphomonoesters	molecular_function	0.21896	1	33	8211	52	14362	BTA013748.1;support_id=CUFF57.390.1,BTA026228.1,BTA024483.1,BTA029091.1,BTA024401.1,BTA006078.1,BTA004718.1,BTA018130.1;support_id=CUFF76.210.4,BTA019494.1,BTA007192.1,BTA002481.1,BTA019206.1,BTA013410.1,BTA002256.1,BTA009321.1,BTA020702.2,BTA009135.1,BTA000266.1,BTA026442.1,BTA020771.1,BTA001364.1,BTA028368.1,BTA003071.1,BTA026851.1,BTA020534.1,BTA004032.1,BTA010658.1,BTA022487.1,BTA003076.1,BTA…
GO:0005272	sodium channel activity	molecular_function	0.22019	1	13	8211	19	14362	BTA006633.1,BTA026707.1,BTA000345.2,BTA024259.1,BTA007643.1,BTA012811.1,BTA000306.1,BTA015269.1,BTA000415.1,BTA018905.1,BTA025031.1,BTA000768.1,BTA023332.1
GO:1902580	single-organism cellular localization	biological_process	0.22064	1	91	8211	150	14362	BTA011576.2;support_id=CUFF48.520.1,BTA029466.1,BTA014095.1,BTA020055.1,BTA006078.1,BTA009211.1,BTA003223.3,BTA021471.1;support_id=CUFF89.562.1,BTA018812.1,BTA016180.1,BTA021341.1,BTA012837.1;support_id=CUFF54.138.1,BTA000563.1,BTA009536.1,BTA000678.1,BTA018973.1,BTA001603.1,BTA005624.1,BTA015059.1,BTA010670.1,BTA022767.1,BTA008667.1,BTA015602.2,BTA009216.1,BTA014047.1,BTA006128.1,BTA014730.1,BTA…
GO:0015081	sodium ion transmembrane transporter activity	molecular_function	0.2216	1	58	8211	94	14362	BTA011100.1,BTA010385.1;support_id=CUFF43.665.2,BTA029883.1,BTA028040.1;support_id=CUFF115.8.1,BTA017930.1;support_id=CUFF75.851.2,BTA027120.1,BTA006031.1,BTA011536.1,BTA023897.1,BTA000214.1,BTA005495.1,BTA001331.1;support_id=CUFF5.63.2,BTA015269.1,BTA004323.1;support_id=CUFF19.529.2,BTA000306.1,BTA029738.1,BTA023952.1,BTA016373.1,BTA004620.1,BTA029737.1,BTA026977.1;support_id=CUFF111.226.1,BTA01…
GO:0009132	nucleoside diphosphate metabolic process	biological_process	0.22228	1	27	8211	42	14362	BTA010951.1,BTA013295.1,BTA012322.1,BTA024733.1,BTA001527.1,BTA023498.1,BTA027927.1,BTA022589.4,BTA001602.1,BTA002013.1,BTA002382.1,BTA020438.1,BTA025675.1,BTA030010.1,BTA018000.1,BTA018016.1,BTA027970.1,BTA010938.1,BTA018111.1,BTA020575.1,BTA029569.1,BTA000518.1,BTA011219.1,BTA004841.1,BTA002736.1,BTA013293.1,BTA022279.1
GO:0006096	glycolytic process	biological_process	0.22268	1	21	8211	32	14362	BTA029569.1,BTA011219.1,BTA000518.1,BTA004841.1,BTA013293.1,BTA018000.1,BTA018016.1,BTA018111.1,BTA010938.1,BTA020575.1,BTA020438.1,BTA030010.1,BTA010951.1,BTA013295.1,BTA012322.1,BTA024733.1,BTA023498.1,BTA001527.1,BTA027927.1,BTA001602.1,BTA022589.4
GO:0006757	ATP generation from ADP	biological_process	0.22268	1	21	8211	32	14362	BTA020438.1,BTA030010.1,BTA010951.1,BTA013295.1,BTA012322.1,BTA024733.1,BTA023498.1,BTA001527.1,BTA027927.1,BTA022589.4,BTA001602.1,BTA029569.1,BTA011219.1,BTA000518.1,BTA004841.1,BTA013293.1,BTA018016.1,BTA018000.1,BTA018111.1,BTA010938.1,BTA020575.1
GO:0009135	purine nucleoside diphosphate metabolic process	biological_process	0.22268	1	21	8211	32	14362	BTA010951.1,BTA012322.1,BTA013295.1,BTA023498.1,BTA001527.1,BTA022589.4,BTA027927.1,BTA001602.1,BTA024733.1,BTA020438.1,BTA030010.1,BTA018016.1,BTA018000.1,BTA020575.1,BTA010938.1,BTA018111.1,BTA029569.1,BTA000518.1,BTA011219.1,BTA004841.1,BTA013293.1
GO:0009179	purine ribonucleoside diphosphate metabolic process	biological_process	0.22268	1	21	8211	32	14362	BTA004841.1,BTA013293.1,BTA029569.1,BTA000518.1,BTA011219.1,BTA020575.1,BTA010938.1,BTA018111.1,BTA018000.1,BTA018016.1,BTA030010.1,BTA020438.1,BTA023498.1,BTA001527.1,BTA022589.4,BTA027927.1,BTA001602.1,BTA024733.1,BTA010951.1,BTA012322.1,BTA013295.1
GO:0009185	ribonucleoside diphosphate metabolic process	biological_process	0.22268	1	21	8211	32	14362	BTA012322.1,BTA013295.1,BTA010951.1,BTA024733.1,BTA027927.1,BTA022589.4,BTA001602.1,BTA001527.1,BTA023498.1,BTA020438.1,BTA030010.1,BTA018000.1,BTA018016.1,BTA010938.1,BTA018111.1,BTA020575.1,BTA000518.1,BTA011219.1,BTA029569.1,BTA013293.1,BTA004841.1
GO:0046031	ADP metabolic process	biological_process	0.22268	1	21	8211	32	14362	BTA029569.1,BTA011219.1,BTA000518.1,BTA004841.1,BTA013293.1,BTA018000.1,BTA018016.1,BTA020575.1,BTA018111.1,BTA010938.1,BTA020438.1,BTA030010.1,BTA010951.1,BTA012322.1,BTA013295.1,BTA023498.1,BTA001527.1,BTA027927.1,BTA022589.4,BTA001602.1,BTA024733.1
GO:0042802	identical protein binding	molecular_function	0.22277	1	42	8211	67	14362	BTA007769.1,BTA020008.2,BTA013767.1,BTA005327.1,BTA008031.1,BTA002227.1,BTA016782.1,BTA005799.1,BTA026579.1,BTA023806.1,BTA003076.1,BTA023775.1,BTA010275.1,BTA028147.1,BTA026755.1,BTA000845.1,BTA000331.1,BTA011067.1,BTA014044.3,BTA001627.1,BTA019718.1,BTA028217.4,BTA018973.1,BTA013597.2;support_id=CUFF56.748.1,BTA011241.1,BTA029043.1,BTA004034.1,BTA029183.1,BTA010379.1,BTA008788.2,BTA026499.1,BTA…
GO:0019899	enzyme binding	molecular_function	0.22477	1	39	8211	62	14362	BTA021174.1,BTA008128.1,BTA026182.1,BTA022297.1,BTA006940.1,BTA010522.1,BTA000098.1,BTA016711.1,BTA003076.1,BTA030118.1,BTA014241.1,BTA028946.1,BTA027841.1,BTA029664.2,BTA019773.1,BTA023874.1,BTA026289.1,BTA004284.1,BTA013767.1,BTA003237.1,BTA003863.1,BTA003864.1,BTA004716.1,BTA016168.1,BTA021814.1,BTA027525.1,BTA024785.1,BTA026237.1,BTA030119.1,BTA023873.1,BTA027118.1,BTA008319.1,BTA020436.1,BTA…
GO:0009312	oligosaccharide biosynthetic process	biological_process	0.22543	1	27	8211	42	14362	BTA017005.1,BTA001159.1,BTA007659.1,BTA028771.1,BTA012529.2,BTA011169.1,BTA010782.1;support_id=CUFF46.75.1,BTA002021.1;support_id=CUFF8.494.2,BTA023385.1,BTA022684.1,BTA011383.1,BTA001161.1,BTA023266.1,BTA002977.1,BTA017297.1,BTA013422.1,BTA019370.1,BTA007616.1,BTA010487.1,BTA026055.1,BTA018431.1,BTA008540.1,BTA000407.1,BTA011916.2,BTA002416.3,BTA019323.1,BTA000986.1
GO:0015698	inorganic anion transport	biological_process	0.227	1	36	8211	57	14362	BTA029912.1,BTA007576.2,BTA003232.1,BTA011169.1,BTA027505.1,BTA002872.1,BTA015153.2,BTA026016.1,BTA003273.1,BTA017719.1,BTA001779.2,BTA003961.1,BTA019047.1,BTA012955.2,BTA011168.1,BTA008041.1,BTA028537.1,BTA001708.1,BTA015080.1,BTA016991.1,BTA007830.1,BTA017564.1,BTA028251.1,BTA011965.1,BTA028045.1,BTA010679.1,BTA009554.1;support_id=CUFF41.186.1,BTA011969.1,BTA013820.1,BTA028919.1,BTA019817.2,BTA…
GO:0004484	mRNA guanylyltransferase activity	molecular_function	0.22748	1	8	8211	11	14362	BTA011479.1,BTA019483.1,BTA003671.1,BTA021525.1,BTA027813.1,BTA015662.1;support_id=CUFF66.477.1,BTA005585.1,BTA012794.1
GO:0016820	hydrolase activity, acting on acid anhydrides, catalyzing transmembrane movement of substances	molecular_function	0.22784	1	69	8211	113	14362	BTA028127.1,BTA028494.2,BTA020058.1,BTA023291.1,BTA001489.1,BTA018679.1,BTA015701.1;support_id=CUFF66.607.1,BTA025671.1,BTA024806.1,BTA027605.1,BTA028971.1,BTA001188.2,BTA005419.2,BTA027422.1,BTA006771.1,BTA013806.2,BTA026695.3,BTA001304.1,BTA015367.1,BTA011431.1,BTA000311.1,BTA017051.1,BTA027033.1,BTA015065.1,BTA006777.1,BTA004057.1,BTA004581.1,BTA003933.1,BTA029770.1,BTA029078.1,BTA024111.1,BTA…
GO:0015711	organic anion transport	biological_process	0.22796	1	49	8211	79	14362	BTA023628.1,BTA000222.1,BTA003629.1,BTA002006.1,BTA006033.1,BTA017256.1,BTA028838.1,BTA002965.1,BTA003893.1,BTA011000.1,BTA025433.1,BTA021661.1,BTA006914.1,BTA014155.1,BTA011186.2,BTA006783.2,BTA000460.1,BTA021509.1,BTA018666.1,BTA014963.1,BTA010928.1,BTA023425.1,BTA030163.1,BTA029883.1,BTA011100.1,BTA006031.1,BTA023639.1,BTA014848.2,BTA001616.1,BTA004765.1,BTA023952.1,BTA029738.1,BTA004007.1,BTA…
GO:0015849	organic acid transport	biological_process	0.22796	1	49	8211	79	14362	BTA014155.1,BTA006914.1,BTA003893.1,BTA021661.1,BTA025433.1,BTA011000.1,BTA014963.1,BTA010928.1,BTA018666.1,BTA023425.1,BTA030163.1,BTA021509.1,BTA006783.2,BTA011186.2,BTA000460.1,BTA003629.1,BTA002006.1,BTA000222.1,BTA023628.1,BTA028838.1,BTA002965.1,BTA006033.1,BTA017256.1,BTA026193.1,BTA018661.1,BTA028537.1,BTA029737.1,BTA025544.1,BTA021086.1,BTA023399.1,BTA021471.1;support_id=CUFF89.562.1,BTA…
GO:0046942	carboxylic acid transport	biological_process	0.22796	1	49	8211	79	14362	BTA025544.1,BTA023399.1,BTA021086.1,BTA023660.1,BTA021471.1;support_id=CUFF89.562.1,BTA009192.1,BTA003068.1;support_id=CUFF13.29.1,BTA009126.1,BTA019668.1,BTA026193.1,BTA018661.1,BTA028537.1,BTA029737.1,BTA024394.1,BTA001985.1,BTA019245.1,BTA029738.1,BTA004007.1,BTA023952.1,BTA001616.1,BTA004765.1,BTA014848.2,BTA023639.1,BTA006031.1,BTA011100.1,BTA029883.1,BTA023425.1,BTA030163.1,BTA010928.1,BTA0…
GO:0032324	molybdopterin cofactor biosynthetic process	biological_process	0.22851	1	13	8211	19	14362	BTA003933.1,BTA019715.1,BTA012496.1,BTA018437.1,BTA023379.1,BTA000543.1,BTA018414.1,BTA000628.1,BTA018439.1,BTA009704.1,BTA021861.1,BTA024801.1;support_id=CUFF102.342.2,BTA009697.1
GO:0043545	molybdopterin cofactor metabolic process	biological_process	0.22851	1	13	8211	19	14362	BTA009704.1,BTA021861.1,BTA024801.1;support_id=CUFF102.342.2,BTA009697.1,BTA018414.1,BTA018439.1,BTA000628.1,BTA023379.1,BTA000543.1,BTA019715.1,BTA003933.1,BTA012496.1,BTA018437.1
GO:0005801	cis-Golgi network	cellular_component	0.2294	1	16	8211	24	14362	BTA023461.1,BTA019283.1,BTA002761.1,BTA003400.1,BTA019206.1,BTA018973.1,BTA004445.1,BTA024003.1,BTA022367.1,BTA015443.1,BTA022564.1,BTA018809.1,BTA024590.1,BTA009424.1,BTA011689.1,BTA014778.1
GO:0000123	histone acetyltransferase complex	cellular_component	0.22952	1	8	8211	11	14362	BTA012191.1,BTA018658.1,BTA011244.1,BTA003776.1;support_id=CUFF17.298.2,BTA003766.1;support_id=CUFF17.279.1,BTA014311.1,BTA030028.1,BTA013357.1
GO:0031248	protein acetyltransferase complex	cellular_component	0.22952	1	8	8211	11	14362	BTA011244.1,BTA012191.1,BTA018658.1,BTA013357.1,BTA030028.1,BTA003766.1;support_id=CUFF17.279.1,BTA014311.1,BTA003776.1;support_id=CUFF17.298.2
GO:1902493	acetyltransferase complex	cellular_component	0.22952	1	8	8211	11	14362	BTA014311.1,BTA003766.1;support_id=CUFF17.279.1,BTA030028.1,BTA013357.1,BTA003776.1;support_id=CUFF17.298.2,BTA011244.1,BTA018658.1,BTA012191.1
GO:0005798	Golgi-associated vesicle	cellular_component	0.23067	1	8	8211	11	14362	BTA002604.1,BTA022916.1,BTA000946.1,BTA027338.1,BTA029261.1;support_id=CUFF119.484.3,BTA011438.1,BTA024826.3,BTA017093.1
GO:0030660	Golgi-associated vesicle membrane	cellular_component	0.23067	1	8	8211	11	14362	BTA011438.1,BTA024826.3,BTA017093.1,BTA000946.1,BTA027338.1,BTA029261.1;support_id=CUFF119.484.3,BTA002604.1,BTA022916.1
GO:0006402	mRNA catabolic process	biological_process	0.23146	1	16	8211	24	14362	BTA017547.1,BTA019408.1,BTA003560.1,BTA021860.1,BTA020702.2,BTA021589.1,BTA000214.1,BTA002872.1,BTA010317.1,BTA018787.1,BTA012602.1,BTA008360.1,BTA019013.1,BTA027630.1,BTA024003.1,BTA007170.1
GO:0042623	ATPase activity, coupled	molecular_function	0.23151	1	96	8211	159	14362	BTA026879.1,BTA013280.1,BTA005693.1;support_id=CUFF24.748.2,BTA018370.1,BTA002843.1,BTA004618.1,BTA012427.1,BTA025880.1,BTA013519.2,BTA001442.2,BTA006364.1,BTA027827.1,BTA004866.1,BTA019322.1;support_id=CUFF80.266.2,BTA015341.1,BTA001470.1,BTA018678.1,BTA026748.1,BTA018419.1,BTA023529.1,BTA016959.2,BTA015810.1,BTA019503.1,BTA009528.1,BTA013292.1,BTA029713.1,BTA023376.1,BTA006277.2;support_id=CUFF…
GO:0043242	negative regulation of protein complex disassembly	biological_process	0.23239	1	8	8211	11	14362	BTA011796.1,BTA029084.1,BTA029737.1,BTA029098.1,BTA024069.1,BTA012679.1,BTA021474.1,BTA027151.1
GO:1902600	hydrogen ion transmembrane transport	biological_process	0.23252	1	80	8211	132	14362	BTA028693.3,BTA009445.1,BTA004526.1,BTA019147.1,BTA005254.1,BTA024873.1,BTA002304.1,BTA018494.1,BTA006772.1,BTA012992.1,BTA016664.1,BTA030198.1,BTA016180.1,BTA005660.2,BTA006073.1,BTA006464.1,BTA018445.1,BTA028178.1,BTA024822.1,BTA005669.2,BTA012129.1,BTA024047.1,BTA012553.1,BTA022767.1,BTA021977.2,BTA013064.1,BTA008317.1,BTA000474.1,BTA020035.1,BTA011737.1,BTA010932.1,BTA007225.2,BTA013524.1,BTA…
GO:0016298	lipase activity	molecular_function	0.2335	1	19	8211	29	14362	BTA019531.1,BTA017143.1,BTA009477.1,BTA026510.1,BTA020136.1,BTA028305.1,BTA017819.1,BTA005535.1,BTA011559.1,BTA018758.1,BTA024420.1,BTA001467.1,BTA001431.1,BTA002988.4,BTA018809.1,BTA009410.1,BTA019814.1,BTA000365.1,BTA008004.1
GO:0004860	protein kinase inhibitor activity	molecular_function	0.23368	1	11	8211	16	14362	BTA008132.1,BTA000111.1,BTA015556.1,BTA023583.1,BTA015558.1,BTA015555.1,BTA018809.1,BTA025250.1,BTA007666.1,BTA027912.1,BTA004719.1
GO:0019210	kinase inhibitor activity	molecular_function	0.23368	1	11	8211	16	14362	BTA007666.1,BTA004719.1,BTA027912.1,BTA015555.1,BTA018809.1,BTA025250.1,BTA000111.1,BTA008132.1,BTA015558.1,BTA023583.1,BTA015556.1
GO:0006536	glutamate metabolic process	biological_process	0.23404	1	8	8211	11	14362	BTA029066.1,BTA008897.1,BTA023533.1,BTA011719.1,BTA027797.1,BTA001758.2,BTA006928.1,BTA010256.1
GO:0005201	extracellular matrix structural constituent	molecular_function	0.23467	1	8	8211	11	14362	BTA020852.2,BTA001366.1,BTA022206.1,BTA001201.3,BTA024729.1,BTA030186.1,BTA022494.3,BTA024663.2
GO:0006733	oxidoreduction coenzyme metabolic process	biological_process	0.23548	1	37	8211	59	14362	BTA013295.1,BTA012322.1,BTA023447.1,BTA010951.1,BTA022589.4,BTA024733.1,BTA006592.1,BTA028711.1,BTA001197.1,BTA020661.1,BTA008367.1,BTA018000.1,BTA018111.1,BTA010938.1,BTA007219.2,BTA013293.1,BTA004841.1,BTA027927.1,BTA001602.1,BTA001527.1,BTA023498.1,BTA004831.1,BTA000506.1,BTA020438.1,BTA030010.1,BTA018016.1,BTA021924.1,BTA020575.1,BTA020941.1,BTA019627.1,BTA000518.1,BTA018372.1,BTA011219.1,BTA…
GO:1901565	organonitrogen compound catabolic process	biological_process	0.23597	1	34	8211	54	14362	BTA004819.1,BTA000687.1,BTA023664.1,BTA001993.1,BTA022196.1,BTA001337.1,BTA019076.1,BTA010956.1,BTA028599.1;support_id=CUFF117.323.1,BTA007004.1,BTA022361.1,BTA000221.1,BTA011719.1,BTA013031.1,BTA028059.1,BTA011396.1,BTA018743.1,BTA023383.1,BTA023447.1,BTA007388.2,BTA023647.1,BTA001319.1,BTA007645.1,BTA017094.1,BTA016610.1,BTA021303.1,BTA023144.1,BTA008367.1,BTA011522.1,BTA010671.1,BTA026055.1,BT…
GO:0044463	cell projection part	cellular_component	0.23601	1	8	8211	11	14362	BTA022072.1,BTA006381.1,BTA021705.1,BTA006047.1,BTA025651.1,BTA013206.1,BTA011821.1,BTA023019.1;support_id=CUFF95.199.1
GO:0004675	transmembrane receptor protein serine/threonine kinase activity	molecular_function	0.23727	1	11	8211	16	14362	BTA002108.1,BTA019971.1,BTA015449.1,BTA011438.1,BTA000421.1,BTA000395.1,BTA005650.1;support_id=CUFF24.628.1,BTA015397.1,BTA010204.1,BTA000370.1,BTA020444.1
GO:0016638	oxidoreductase activity, acting on the CH-NH2 group of donors	molecular_function	0.23811	1	19	8211	29	14362	BTA029066.1,BTA023533.1,BTA008897.1,BTA023383.1,BTA011556.1,BTA030203.5,BTA001758.2,BTA006928.1,BTA023647.1,BTA014804.1,BTA020269.1,BTA010256.1,BTA013160.1;support_id=CUFF55.163.1,BTA007004.1,BTA011719.1,BTA015752.1,BTA000263.1;support_id=CUFF2.269.1,BTA027797.1,BTA004851.1
GO:0003906	DNA-(apurinic or apyrimidinic site) lyase activity	molecular_function	0.2383	1	8	8211	11	14362	BTA011950.1,BTA017740.1,BTA008191.1;support_id=CUFF34.631.1,BTA016848.2;support_id=CUFF72.270.1,BTA010343.2,BTA004291.1,BTA006067.1;support_id=CUFF26.309.1,BTA017725.1
GO:0010562	positive regulation of phosphorus metabolic process	biological_process	0.23856	1	8	8211	11	14362	BTA005964.1,BTA018619.1,BTA026859.1,BTA002147.1;support_id=CUFF9.207.1,BTA002944.1,BTA023731.1,BTA011625.1,BTA019417.1
GO:0031401	positive regulation of protein modification process	biological_process	0.23856	1	8	8211	11	14362	BTA026859.1,BTA018619.1,BTA005964.1,BTA002147.1;support_id=CUFF9.207.1,BTA002944.1,BTA019417.1,BTA011625.1,BTA023731.1
GO:0045937	positive regulation of phosphate metabolic process	biological_process	0.23856	1	8	8211	11	14362	BTA019417.1,BTA023731.1,BTA011625.1,BTA002944.1,BTA002147.1;support_id=CUFF9.207.1,BTA018619.1,BTA005964.1,BTA026859.1
GO:0006486	protein glycosylation	biological_process	0.23863	1	37	8211	59	14362	BTA026005.1,BTA012192.1,BTA024463.1,BTA012603.1,BTA023811.1,BTA019628.2,BTA027382.1,BTA030091.1,BTA018495.1,BTA011081.1,BTA005229.1,BTA020226.1,BTA010452.1,BTA016326.1,BTA021028.2,BTA006420.1,BTA024038.1,BTA023661.1,BTA016959.2,BTA019574.1,BTA014870.1,BTA005138.1,BTA007732.2,BTA030090.1,BTA028994.1,BTA020620.1,BTA004490.1;support_id=CUFF20.170.2,BTA027663.1,BTA011631.2,BTA003387.2,BTA001066.1,BTA…
GO:0043413	macromolecule glycosylation	biological_process	0.23863	1	37	8211	59	14362	BTA012192.1,BTA026005.1,BTA024463.1,BTA023811.1,BTA012603.1,BTA019628.2,BTA027382.1,BTA030091.1,BTA011081.1,BTA018495.1,BTA005229.1,BTA016326.1,BTA020226.1,BTA010452.1,BTA021028.2,BTA006420.1,BTA024038.1,BTA016959.2,BTA023661.1,BTA014870.1,BTA019574.1,BTA005138.1,BTA007732.2,BTA030090.1,BTA028994.1,BTA004490.1;support_id=CUFF20.170.2,BTA027663.1,BTA020620.1,BTA001066.1,BTA011631.2,BTA003387.2,BTA…
GO:0030077	plasma membrane light-harvesting complex	cellular_component	0.24022	1	8	8211	11	14362	BTA028848.1;support_id=CUFF118.317.2,BTA019785.1;support_id=CUFF82.119.2,BTA022020.1,BTA002519.1,BTA027678.1,BTA028770.1,BTA010277.1,BTA006067.1;support_id=CUFF26.309.1
GO:0042716	plasma membrane-derived chromatophore	cellular_component	0.24022	1	8	8211	11	14362	BTA028848.1;support_id=CUFF118.317.2,BTA019785.1;support_id=CUFF82.119.2,BTA022020.1,BTA002519.1,BTA027678.1,BTA028770.1,BTA010277.1,BTA006067.1;support_id=CUFF26.309.1
GO:0045156	electron transporter, transferring electrons within the cyclic electron transport pathway of photosynthesis activity	molecular_function	0.24022	1	8	8211	11	14362	BTA022020.1,BTA028848.1;support_id=CUFF118.317.2,BTA019785.1;support_id=CUFF82.119.2,BTA006067.1;support_id=CUFF26.309.1,BTA010277.1,BTA028770.1,BTA027678.1,BTA002519.1
GO:0007020	microtubule nucleation	biological_process	0.24023	1	8	8211	11	14362	BTA010292.1,BTA011643.1,BTA010479.1,BTA013283.1,BTA002340.1,BTA011285.1,BTA019868.1,BTA007215.1
GO:0010968	regulation of microtubule nucleation	biological_process	0.24023	1	8	8211	11	14362	BTA007215.1,BTA019868.1,BTA013283.1,BTA011285.1,BTA002340.1,BTA010479.1,BTA011643.1,BTA010292.1
GO:0031112	positive regulation of microtubule polymerization or depolymerization	biological_process	0.24023	1	8	8211	11	14362	BTA010292.1,BTA010479.1,BTA011643.1,BTA011285.1,BTA002340.1,BTA013283.1,BTA007215.1,BTA019868.1
GO:0031113	regulation of microtubule polymerization	biological_process	0.24023	1	8	8211	11	14362	BTA011643.1,BTA010479.1,BTA010292.1,BTA019868.1,BTA007215.1,BTA013283.1,BTA002340.1,BTA011285.1
GO:0031116	positive regulation of microtubule polymerization	biological_process	0.24023	1	8	8211	11	14362	BTA002340.1,BTA011285.1,BTA013283.1,BTA019868.1,BTA007215.1,BTA010292.1,BTA011643.1,BTA010479.1
GO:0046785	microtubule polymerization	biological_process	0.24023	1	8	8211	11	14362	BTA019868.1,BTA007215.1,BTA013283.1,BTA002340.1,BTA011285.1,BTA011643.1,BTA010479.1,BTA010292.1
GO:0090063	positive regulation of microtubule nucleation	biological_process	0.24023	1	8	8211	11	14362	BTA010479.1,BTA011643.1,BTA010292.1,BTA007215.1,BTA019868.1,BTA013283.1,BTA011285.1,BTA002340.1
GO:0098519	nucleotide phosphatase activity, acting on free nucleotides	molecular_function	0.24206	1	34	8211	54	14362	BTA016946.1,BTA024801.1;support_id=CUFF102.342.2,BTA016043.1,BTA001385.1,BTA009563.1,BTA003623.1,BTA030015.1,BTA011326.1,BTA013336.2,BTA003128.1,BTA022315.1,BTA015059.1,BTA013344.1,BTA029919.1,BTA023866.1,BTA018370.1,BTA024292.2,BTA024075.1,BTA018414.1,BTA029273.1,BTA022240.1,BTA000543.1,BTA004866.1,BTA018316.1,BTA018676.1,BTA026903.5,BTA029565.1,BTA028835.1,BTA024732.1,BTA023925.1,BTA000821.1,BT…
GO:0000049	tRNA binding	molecular_function	0.24211	1	19	8211	29	14362	BTA013768.1,BTA018401.1,BTA017726.1,BTA015202.1,BTA019161.2,BTA004877.1,BTA025999.1,BTA004983.1,BTA027924.1,BTA027789.1,BTA019066.1,BTA013786.1,BTA007587.2,BTA026992.1,BTA020115.1,BTA026101.1,BTA029901.1,BTA004988.1,BTA017739.1
GO:0008026	ATP-dependent helicase activity	molecular_function	0.24228	1	31	8211	49	14362	BTA021556.1,BTA029751.1,BTA012566.1,BTA023523.1,BTA001470.1,BTA015341.1,BTA014527.1,BTA020154.1,BTA015810.1,BTA025678.1,BTA016959.2,BTA006348.1,BTA029796.1,BTA009528.1,BTA029713.1,BTA021967.3,BTA006047.1,BTA015059.1,BTA016251.1,BTA006636.1,BTA027770.1,BTA000359.1,BTA026879.1,BTA013280.1,BTA022454.1,BTA014315.1,BTA028609.1,BTA001442.2,BTA000782.2,BTA016221.1,BTA006364.1
GO:0070035	purine NTP-dependent helicase activity	molecular_function	0.24228	1	31	8211	49	14362	BTA027770.1,BTA006636.1,BTA000359.1,BTA022454.1,BTA026879.1,BTA013280.1,BTA014315.1,BTA028609.1,BTA001442.2,BTA000782.2,BTA016221.1,BTA006364.1,BTA021556.1,BTA029751.1,BTA012566.1,BTA023523.1,BTA015341.1,BTA001470.1,BTA020154.1,BTA014527.1,BTA015810.1,BTA025678.1,BTA016959.2,BTA006348.1,BTA029796.1,BTA009528.1,BTA029713.1,BTA021967.3,BTA006047.1,BTA015059.1,BTA016251.1
GO:0016052	carbohydrate catabolic process	biological_process	0.24658	1	31	8211	49	14362	BTA022589.4,BTA027927.1,BTA001602.1,BTA023498.1,BTA001527.1,BTA004816.1,BTA024733.1,BTA009752.1,BTA013295.1,BTA012322.1,BTA010951.1,BTA012723.1,BTA030010.1,BTA021955.1;support_id=CUFF92.66.2,BTA020438.1,BTA020575.1,BTA026996.1;support_id=CUFF111.259.1,BTA010938.1,BTA018111.1,BTA018371.1,BTA018000.1,BTA018016.1,BTA001523.1,BTA022030.1,BTA017428.1,BTA010385.1;support_id=CUFF43.665.2,BTA013293.1,BTA…
GO:0042803	protein homodimerization activity	molecular_function	0.2472	1	31	8211	49	14362	BTA011241.1,BTA013597.2;support_id=CUFF56.748.1,BTA028217.4,BTA018973.1,BTA013767.1,BTA020008.2,BTA007769.1,BTA008788.2,BTA029183.1,BTA004034.1,BTA010379.1,BTA029043.1,BTA022920.1,BTA002227.1,BTA026579.1,BTA016782.1,BTA008348.1;support_id=CUFF35.304.1,BTA004204.1,BTA026755.1,BTA028147.1,BTA002151.1,BTA003076.1,BTA010275.1,BTA011067.1,BTA000845.1,BTA001991.1,BTA022427.3,BTA014044.3,BTA026578.1,BTA…
GO:0005794	Golgi apparatus	cellular_component	0.24724	1	44	8211	71	14362	BTA012529.2,BTA024826.3,BTA001159.1,BTA006296.1,BTA014903.1;support_id=CUFF62.196.1,BTA029261.1;support_id=CUFF119.484.3,BTA027338.1,BTA009970.1,BTA022916.1,BTA026578.1,BTA022531.1,BTA003887.1,BTA030085.1;support_id=CUFF124.220.1,BTA023054.1,BTA019232.1,BTA010379.1,BTA011438.1,BTA001615.1,BTA019591.1,BTA029083.1,BTA029581.1,BTA013422.1,BTA000986.1,BTA029097.1,BTA011916.2,BTA011739.1,BTA011951.1,B…
GO:0065004	protein-DNA complex assembly	biological_process	0.24849	1	29	8211	46	14362	BTA019923.1,BTA023383.1,BTA023627.1;support_id=CUFF97.322.1,BTA004232.1,BTA022135.1,BTA001737.1,BTA026719.2,BTA025544.1,BTA018468.3,BTA026707.1,BTA011213.1;support_id=CUFF47.367.1,BTA014580.1,BTA003814.2,BTA000415.1,BTA015620.1;support_id=CUFF66.335.2,BTA001244.1,BTA021199.1,BTA001350.1,BTA012977.1,BTA020043.1,BTA026295.2,BTA009655.1,BTA020083.1,BTA023888.1;support_id=CUFF98.271.1,BTA000844.1,BTA…
GO:0071824	protein-DNA complex subunit organization	biological_process	0.24849	1	29	8211	46	14362	BTA023627.1;support_id=CUFF97.322.1,BTA004232.1,BTA019923.1,BTA023383.1,BTA026719.2,BTA025544.1,BTA022135.1,BTA001737.1,BTA026707.1,BTA018468.3,BTA003814.2,BTA014580.1,BTA011213.1;support_id=CUFF47.367.1,BTA015620.1;support_id=CUFF66.335.2,BTA001244.1,BTA000415.1,BTA001350.1,BTA021199.1,BTA020083.1,BTA009655.1,BTA026295.2,BTA020043.1,BTA012977.1,BTA002690.1,BTA017357.1,BTA025480.1,BTA000844.1,BTA…
GO:0051704	multi-organism process	biological_process	0.24863	1	401	8211	685	14362	BTA029272.1,BTA012946.1;support_id=CUFF54.424.1,BTA000541.1,BTA028744.1;support_id=CUFF117.740.2,BTA028451.1,BTA012828.2,BTA006276.1,BTA004680.1,BTA028719.1,BTA000481.1,BTA029270.2,BTA004493.1,BTA021917.1,BTA000079.1,BTA021341.1,BTA020154.1,BTA021548.3,BTA021393.1,BTA016485.1;support_id=CUFF71.200.1,BTA019370.1,BTA015059.1,BTA001161.1,BTA000526.1,BTA003020.1,BTA001743.1,BTA011227.1,BTA029709.1,BT…
GO:0033013	tetrapyrrole metabolic process	biological_process	0.24959	1	85	8211	141	14362	BTA018803.1,BTA007765.1,BTA015064.1,BTA020659.1,BTA027323.1,BTA027880.1,BTA003300.1,BTA013456.1;support_id=CUFF56.326.1,BTA027881.1,BTA006745.1,BTA022324.1,BTA014311.1,BTA016313.1,BTA017774.1,BTA000549.1,BTA004572.1,BTA023640.2,BTA018355.1,BTA020219.1,BTA001993.1,BTA005197.1;support_id=CUFF22.573.2,BTA025620.1;support_id=CUFF105.400.2,BTA022364.1,BTA012257.4,BTA005651.1,BTA003085.1;support_id=CUF…
GO:0009512	cytochrome b6f complex	cellular_component	0.25007	1	11	8211	16	14362	BTA026530.1,BTA003223.3,BTA017043.1,BTA006281.1,BTA019459.1,BTA024027.1,BTA029165.1,BTA023135.1;support_id=CUFF95.537.1,BTA026297.1,BTA001895.1,BTA022534.1
GO:0006213	pyrimidine nucleoside metabolic process	biological_process	0.25088	1	6	8211	8	14362	BTA002013.1,BTA026439.1,BTA027970.1,BTA007645.1,BTA002736.1,BTA027922.1
GO:0006310	DNA recombination	biological_process	0.25093	1	144	8211	242	14362	BTA023727.1,BTA015902.1,BTA004004.2,BTA027903.1,BTA026237.1,BTA028310.1,BTA011675.1,BTA024053.1,BTA012406.1,BTA016043.1,BTA007277.1,BTA028685.1,BTA029038.1;support_id=CUFF118.867.2,BTA020862.1,BTA021182.1,BTA005252.1,BTA018546.1,BTA028822.1;support_id=CUFF118.205.1,BTA000344.1,BTA010951.1,BTA023519.1,BTA020585.1,BTA001705.2,BTA025519.1,BTA013603.1;support_id=CUFF57.5.1,BTA012267.1,BTA018414.1,BTA…
GO:0034613	cellular protein localization	biological_process	0.25126	1	260	8211	441	14362	BTA006421.1,BTA021341.1,BTA015059.1,BTA021707.1,BTA007192.1,BTA008667.1,BTA019283.1,BTA029261.1;support_id=CUFF119.484.3,BTA000079.1,BTA005226.1,BTA003223.3,BTA009211.1,BTA015723.1,BTA029455.2,BTA020719.1;support_id=CUFF86.420.1,BTA011364.1,BTA023925.1,BTA006128.1,BTA024484.1,BTA011737.1,BTA009310.1,BTA029065.1,BTA002103.1,BTA013115.1,BTA010318.1,BTA025695.1,BTA017670.1,BTA013015.1,BTA000385.1,BT…
GO:0070727	cellular macromolecule localization	biological_process	0.25126	1	260	8211	441	14362	BTA026255.1,BTA006883.1,BTA010823.1;support_id=CUFF46.164.2,BTA030119.1,BTA027690.1,BTA018809.1,BTA017670.1,BTA013015.1,BTA022315.1,BTA000385.1,BTA018830.1,BTA020436.1,BTA010522.1,BTA003932.1,BTA025919.1,BTA009375.1,BTA001154.1,BTA020483.1,BTA026755.1,BTA016711.1,BTA021970.1,BTA023828.1,BTA029124.1,BTA016782.1,BTA004057.1,BTA007615.1,BTA028838.1,BTA026238.1,BTA005226.1,BTA029261.1;support_id=CUFF…
GO:0006006	glucose metabolic process	biological_process	0.25198	1	11	8211	16	14362	BTA011219.1,BTA000518.1,BTA000542.1,BTA004841.1,BTA013293.1,BTA019499.1;support_id=CUFF81.33.1,BTA003667.1,BTA018371.1,BTA013295.1,BTA028750.1,BTA024733.1
GO:0009117	nucleotide metabolic process	biological_process	0.25199	1	158	8211	266	14362	BTA018678.1,BTA012188.2,BTA006290.1,BTA016429.1,BTA021666.1,BTA008141.1,BTA007709.1,BTA001461.2,BTA013656.1,BTA023130.1,BTA005584.1,BTA020035.1,BTA013064.1,BTA020661.1,BTA001197.1,BTA012322.1,BTA017267.1,BTA012427.1,BTA009447.1,BTA024634.1,BTA021534.2;support_id=CUFF89.776.2,BTA024733.1,BTA028178.1,BTA018716.1,BTA006464.1,BTA002499.1,BTA023378.1,BTA027511.1,BTA020941.1,BTA000506.1,BTA002304.1,BTA…
GO:0004826	phenylalanine-tRNA ligase activity	molecular_function	0.25209	1	11	8211	16	14362	BTA005077.1,BTA025999.1,BTA029178.1,BTA022669.1,BTA019923.1,BTA026992.1,BTA016502.1,BTA021071.1,BTA008789.1,BTA014711.1,BTA013768.1
GO:0044703	multi-organism reproductive process	biological_process	0.25227	1	38	8211	61	14362	BTA012946.1;support_id=CUFF54.424.1,BTA029272.1,BTA028744.1;support_id=CUFF117.740.2,BTA016017.1,BTA023255.1,BTA014782.1;support_id=CUFF61.626.1,BTA029395.1,BTA009730.1,BTA029918.1,BTA008534.1,BTA013650.1,BTA016485.1;support_id=CUFF71.200.1,BTA003784.1;support_id=CUFF17.316.1,BTA020698.1,BTA003554.1,BTA005885.1,BTA026573.1,BTA023871.1,BTA014297.1,BTA014089.3,BTA001309.1,BTA011210.1,BTA002147.1;su…
GO:0031410	cytoplasmic vesicle	cellular_component	0.2524	1	48	8211	78	14362	BTA014011.1,BTA011438.1,BTA002761.1,BTA002519.1,BTA027718.1,BTA010277.1,BTA029261.1;support_id=CUFF119.484.3,BTA027338.1,BTA027426.1,BTA017518.1,BTA024826.3,BTA027678.1,BTA006397.1,BTA022916.1,BTA003619.1,BTA012946.1;support_id=CUFF54.424.1,BTA016737.1,BTA028848.1;support_id=CUFF118.317.2,BTA030126.1,BTA019785.1;support_id=CUFF82.119.2,BTA021476.1,BTA025375.1,BTA000946.1,BTA009557.1,BTA012508.1,B…
GO:0052689	carboxylic ester hydrolase activity	molecular_function	0.25256	1	35	8211	56	14362	BTA029267.2,BTA027175.1,BTA008540.1,BTA017261.1,BTA018758.1,BTA018121.1,BTA026510.1,BTA026055.1,BTA029176.1,BTA018358.1,BTA001319.1,BTA025946.1,BTA009845.1,BTA024549.1,BTA007388.2,BTA018055.1,BTA009805.1,BTA011559.1,BTA005535.1,BTA023121.1,BTA029891.1,BTA019241.1,BTA010195.2,BTA000365.1,BTA002871.1,BTA014209.2,BTA023646.1,BTA010956.1,BTA019814.1,BTA000687.1,BTA006772.1,BTA027766.1,BTA014108.1,BTA…
GO:0016782	transferase activity, transferring sulfur-containing groups	molecular_function	0.25317	1	26	8211	41	14362	BTA019279.1,BTA014311.1,BTA029001.1,BTA023025.1,BTA014776.1,BTA029582.2,BTA019236.1,BTA003402.1,BTA022940.1,BTA028373.1,BTA003850.1,BTA020979.1,BTA009110.1,BTA022263.1,BTA008321.1,BTA013491.2,BTA007557.1,BTA028374.1,BTA027707.1,BTA020978.1,BTA007882.1,BTA024914.1,BTA012783.1,BTA000336.1,BTA021632.1;support_id=CUFF90.161.1,BTA008414.1
GO:0051119	sugar transmembrane transporter activity	molecular_function	0.2548	1	6	8211	8	14362	BTA003887.1,BTA029581.1,BTA029083.1,BTA015301.1,BTA029097.1,BTA012343.1
GO:0016759	cellulose synthase activity	molecular_function	0.25492	1	6	8211	8	14362	BTA027046.1,BTA026799.3;support_id=CUFF109.705.3,BTA009208.1,BTA001448.2;support_id=CUFF5.371.1,BTA009126.1,BTA008896.1;support_id=CUFF37.723.2
GO:0016760	cellulose synthase (UDP-forming) activity	molecular_function	0.25492	1	6	8211	8	14362	BTA026799.3;support_id=CUFF109.705.3,BTA027046.1,BTA009208.1,BTA001448.2;support_id=CUFF5.371.1,BTA009126.1,BTA008896.1;support_id=CUFF37.723.2
GO:0008064	regulation of actin polymerization or depolymerization	biological_process	0.2553	1	14	8211	21	14362	BTA005963.1;support_id=CUFF26.1.1,BTA004909.1,BTA027151.1,BTA021474.1,BTA012679.1,BTA029531.1,BTA009746.2,BTA029098.1,BTA029737.1,BTA003196.1,BTA029084.1,BTA011072.1,BTA024785.1;support_id=CUFF102.306.1,BTA011796.1
GO:0008154	actin polymerization or depolymerization	biological_process	0.2553	1	14	8211	21	14362	BTA009746.2,BTA029098.1,BTA029531.1,BTA029737.1,BTA003196.1,BTA024785.1;support_id=CUFF102.306.1,BTA011072.1,BTA029084.1,BTA011796.1,BTA005963.1;support_id=CUFF26.1.1,BTA027151.1,BTA004909.1,BTA021474.1,BTA012679.1
GO:0030041	actin filament polymerization	biological_process	0.2553	1	14	8211	21	14362	BTA009746.2,BTA029098.1,BTA029531.1,BTA003196.1,BTA029737.1,BTA024785.1;support_id=CUFF102.306.1,BTA011072.1,BTA029084.1,BTA011796.1,BTA005963.1;support_id=CUFF26.1.1,BTA027151.1,BTA004909.1,BTA021474.1,BTA012679.1
GO:0030832	regulation of actin filament length	biological_process	0.2553	1	14	8211	21	14362	BTA009746.2,BTA029098.1,BTA029531.1,BTA029737.1,BTA003196.1,BTA024785.1;support_id=CUFF102.306.1,BTA011072.1,BTA029084.1,BTA011796.1,BTA005963.1;support_id=CUFF26.1.1,BTA027151.1,BTA004909.1,BTA021474.1,BTA012679.1
GO:0030833	regulation of actin filament polymerization	biological_process	0.2553	1	14	8211	21	14362	BTA021474.1,BTA012679.1,BTA005963.1;support_id=CUFF26.1.1,BTA004909.1,BTA027151.1,BTA029084.1,BTA011072.1,BTA024785.1;support_id=CUFF102.306.1,BTA011796.1,BTA029531.1,BTA009746.2,BTA029098.1,BTA029737.1,BTA003196.1
GO:0032535	regulation of cellular component size	biological_process	0.2553	1	14	8211	21	14362	BTA027151.1,BTA004909.1,BTA005963.1;support_id=CUFF26.1.1,BTA012679.1,BTA021474.1,BTA029737.1,BTA003196.1,BTA029098.1,BTA009746.2,BTA029531.1,BTA011796.1,BTA024785.1;support_id=CUFF102.306.1,BTA029084.1,BTA011072.1
GO:0032956	regulation of actin cytoskeleton organization	biological_process	0.2553	1	14	8211	21	14362	BTA029531.1,BTA009746.2,BTA029098.1,BTA029737.1,BTA003196.1,BTA029084.1,BTA011072.1,BTA024785.1;support_id=CUFF102.306.1,BTA011796.1,BTA005963.1;support_id=CUFF26.1.1,BTA004909.1,BTA027151.1,BTA021474.1,BTA012679.1
GO:0032970	regulation of actin filament-based process	biological_process	0.2553	1	14	8211	21	14362	BTA021474.1,BTA012679.1,BTA005963.1;support_id=CUFF26.1.1,BTA027151.1,BTA004909.1,BTA024785.1;support_id=CUFF102.306.1,BTA029084.1,BTA011072.1,BTA011796.1,BTA009746.2,BTA029098.1,BTA029531.1,BTA029737.1,BTA003196.1
GO:0006027	glycosaminoglycan catabolic process	biological_process	0.25568	1	6	8211	8	14362	BTA022361.1,BTA004819.1,BTA019076.1,BTA023664.1,BTA013031.1,BTA028059.1
GO:0009253	peptidoglycan catabolic process	biological_process	0.25568	1	6	8211	8	14362	BTA004819.1,BTA022361.1,BTA028059.1,BTA013031.1,BTA019076.1,BTA023664.1
GO:0000922	spindle pole	cellular_component	0.25584	1	11	8211	16	14362	BTA007215.1,BTA019868.1,BTA013283.1,BTA011285.1,BTA022530.1,BTA002340.1,BTA014118.1,BTA010479.1,BTA011643.1,BTA010292.1,BTA027034.1
GO:0044801	single-organism membrane fusion	biological_process	0.25657	1	14	8211	21	14362	BTA030085.1;support_id=CUFF124.220.1,BTA017169.1,BTA016246.1,BTA028523.1,BTA007640.1,BTA011571.1,BTA025375.1,BTA000392.1,BTA009970.1,BTA012946.1;support_id=CUFF54.424.1,BTA029569.1,BTA029918.1,BTA030010.1,BTA016227.1
GO:0019439	aromatic compound catabolic process	biological_process	0.25812	1	45	8211	73	14362	BTA004320.1,BTA024003.1,BTA017094.1,BTA007170.1,BTA025199.1,BTA007645.1,BTA001319.1,BTA001197.1,BTA007388.2,BTA010317.1,BTA002872.1,BTA012602.1,BTA023447.1,BTA018787.1,BTA020465.1,BTA001802.1,BTA018743.1,BTA015072.1,BTA002399.1,BTA021589.1,BTA011256.1,BTA008540.1,BTA026055.1,BTA010671.1,BTA008367.1,BTA023144.1,BTA021303.1,BTA017547.1,BTA014720.1,BTA010956.1,BTA027630.1,BTA008360.1,BTA002011.1,BTA…
GO:0015643	toxic substance binding	molecular_function	0.25842	1	6	8211	8	14362	BTA027176.1,BTA017135.1,BTA029073.1,BTA026265.1;support_id=CUFF108.147.1,BTA007633.1,BTA018361.1
GO:0007264	small GTPase mediated signal transduction	biological_process	0.2585	1	131	8211	220	14362	BTA029882.1,BTA001736.1,BTA026190.1,BTA016020.1,BTA007831.1,BTA005642.2,BTA026025.1,BTA000038.1,BTA002691.1,BTA026739.1,BTA028620.1,BTA008128.1,BTA003837.1,BTA021336.1,BTA029000.1,BTA019151.1,BTA004295.1,BTA021082.1,BTA030120.1,BTA029085.1,BTA019934.1,BTA006078.1,BTA021388.1,BTA005558.1,BTA004676.1,BTA001092.2,BTA009866.1,BTA004687.1,BTA023131.1,BTA009348.1,BTA021596.1,BTA013087.1,BTA016853.1,BTA…
GO:0003951	NAD+ kinase activity	molecular_function	0.25869	1	6	8211	8	14362	BTA000506.1,BTA010938.1,BTA020949.1,BTA001527.1,BTA020941.1,BTA001197.1
GO:0006741	NADP biosynthetic process	biological_process	0.25869	1	6	8211	8	14362	BTA020941.1,BTA001197.1,BTA001527.1,BTA020949.1,BTA010938.1,BTA000506.1
GO:0006401	RNA catabolic process	biological_process	0.25972	1	17	8211	26	14362	BTA020465.1,BTA018787.1,BTA012602.1,BTA010317.1,BTA002872.1,BTA019013.1,BTA008360.1,BTA027630.1,BTA024003.1,BTA007170.1,BTA017547.1,BTA019408.1,BTA003560.1,BTA000214.1,BTA021589.1,BTA021860.1,BTA020702.2
GO:0008483	transaminase activity	molecular_function	0.25973	1	14	8211	21	14362	BTA026174.1,BTA004995.1,BTA004871.1,BTA004814.1,BTA027882.1,BTA022657.1,BTA027906.1,BTA029254.1,BTA016343.1,BTA025764.1,BTA016318.1,BTA023651.1,BTA011242.1,BTA027872.1
GO:0006275	regulation of DNA replication	biological_process	0.26003	1	14	8211	21	14362	BTA010658.1,BTA019195.2,BTA015123.1;support_id=CUFF62.581.1,BTA022070.1,BTA020063.1,BTA002577.1,BTA027586.1,BTA017886.1,BTA014808.1;support_id=CUFF61.671.1,BTA002989.1,BTA009066.1,BTA021016.1,BTA024683.1,BTA015243.1
GO:0090150	establishment of protein localization to membrane	biological_process	0.26056	1	48	8211	78	14362	BTA018830.1,BTA019408.1,BTA022227.1,BTA011241.1,BTA022315.1,BTA015059.1,BTA000678.1,BTA013015.1,BTA009536.1,BTA012410.1,BTA005252.1,BTA009697.1,BTA000563.1,BTA009563.1,BTA016180.1,BTA003223.3,BTA010823.1;support_id=CUFF46.164.2,BTA024334.1,BTA000359.1,BTA022312.1,BTA014095.1,BTA001377.1,BTA026238.1,BTA021666.1,BTA009528.1,BTA014100.2,BTA017043.1,BTA026136.1,BTA023925.1,BTA006565.1,BTA022409.1,BTA…
GO:0006625	protein targeting to peroxisome	biological_process	0.26086	1	6	8211	8	14362	BTA021471.1;support_id=CUFF89.562.1,BTA010256.1,BTA020719.1;support_id=CUFF86.420.1,BTA006128.1,BTA008897.1,BTA001603.1
GO:0043574	peroxisomal transport	biological_process	0.26086	1	6	8211	8	14362	BTA010256.1,BTA021471.1;support_id=CUFF89.562.1,BTA001603.1,BTA008897.1,BTA020719.1;support_id=CUFF86.420.1,BTA006128.1
GO:0072662	protein localization to peroxisome	biological_process	0.26086	1	6	8211	8	14362	BTA008897.1,BTA001603.1,BTA020719.1;support_id=CUFF86.420.1,BTA006128.1,BTA010256.1,BTA021471.1;support_id=CUFF89.562.1
GO:0072663	establishment of protein localization to peroxisome	biological_process	0.26086	1	6	8211	8	14362	BTA020719.1;support_id=CUFF86.420.1,BTA006128.1,BTA001603.1,BTA008897.1,BTA021471.1;support_id=CUFF89.562.1,BTA010256.1
GO:0009311	oligosaccharide metabolic process	biological_process	0.26108	1	35	8211	56	14362	BTA001161.1,BTA011383.1,BTA012794.1,BTA002021.1;support_id=CUFF8.494.2,BTA014318.1,BTA011169.1,BTA009394.1,BTA028771.1,BTA017005.1,BTA021525.1,BTA002416.3,BTA008540.1,BTA026055.1,BTA007616.1,BTA023266.1,BTA002977.1,BTA017297.1,BTA023385.1,BTA022684.1,BTA010782.1;support_id=CUFF46.75.1,BTA005663.1,BTA026893.1,BTA012529.2,BTA007659.1,BTA009393.1,BTA001159.1,BTA017163.1,BTA019323.1,BTA000986.1,BTA01…
GO:0044461	bacterial-type flagellum part	cellular_component	0.2615	1	6	8211	8	14362	BTA011821.1,BTA023019.1;support_id=CUFF95.199.1,BTA013206.1,BTA022072.1,BTA021705.1,BTA006381.1
GO:0004144	diacylglycerol O-acyltransferase activity	molecular_function	0.26156	1	6	8211	8	14362	BTA012560.1,BTA004802.1,BTA026863.1,BTA011604.1,BTA021458.1,BTA005276.1
GO:0016411	acylglycerol O-acyltransferase activity	molecular_function	0.26156	1	6	8211	8	14362	BTA005276.1,BTA011604.1,BTA021458.1,BTA004802.1,BTA026863.1,BTA012560.1
GO:0019684	photosynthesis, light reaction	biological_process	0.26156	1	14	8211	21	14362	BTA028770.1,BTA027678.1,BTA002519.1,BTA006067.1;support_id=CUFF26.309.1,BTA010277.1,BTA028848.1;support_id=CUFF118.317.2,BTA002673.1;support_id=CUFF11.600.1,BTA019785.1;support_id=CUFF82.119.2,BTA023837.1,BTA002481.1,BTA015751.1;support_id=CUFF67.35.1,BTA009877.1,BTA022020.1,BTA018115.1
GO:0004418	hydroxymethylbilane synthase activity	molecular_function	0.26245	1	6	8211	8	14362	BTA020219.1,BTA017561.1,BTA029306.1,BTA004391.1,BTA023640.2,BTA027880.1
GO:0008242	omega peptidase activity	molecular_function	0.26257	1	6	8211	8	14362	BTA001282.1,BTA020569.1,BTA010160.1,BTA009797.1,BTA014826.1,BTA022720.1
GO:0005581	collagen trimer	cellular_component	0.26331	1	6	8211	8	14362	BTA022494.3,BTA020852.2,BTA001366.1,BTA024663.2,BTA001201.3,BTA022206.1
GO:0051276	chromosome organization	biological_process	0.26428	1	137	8211	230	14362	BTA012316.2,BTA007267.1,BTA003929.1,BTA004404.1;support_id=CUFF19.741.1,BTA000067.1;support_id=CUFF1.157.1,BTA001737.1,BTA029395.1,BTA027826.1,BTA009554.1;support_id=CUFF41.186.1,BTA009887.1;support_id=CUFF42.234.1,BTA014288.1,BTA020083.1,BTA028573.3,BTA027528.1,BTA015323.1,BTA003128.1,BTA006686.1,BTA005693.1;support_id=CUFF24.748.2,BTA007225.2,BTA007413.1,BTA004618.1,BTA003232.1,BTA013519.2,BTA0…
GO:0005891	voltage-gated calcium channel complex	cellular_component	0.26496	1	6	8211	8	14362	BTA008896.1;support_id=CUFF37.723.2,BTA006772.1,BTA002708.1,BTA001407.1,BTA029122.3,BTA012852.1
GO:0034704	calcium channel complex	cellular_component	0.26496	1	6	8211	8	14362	BTA012852.1,BTA029122.3,BTA001407.1,BTA002708.1,BTA006772.1,BTA008896.1;support_id=CUFF37.723.2
GO:0031982	vesicle	cellular_component	0.2662	1	49	8211	80	14362	BTA025375.1,BTA021476.1,BTA030126.1,BTA028848.1;support_id=CUFF118.317.2,BTA019785.1;support_id=CUFF82.119.2,BTA000946.1,BTA012508.1,BTA003933.1,BTA009557.1,BTA028770.1,BTA008208.1,BTA007279.1,BTA002679.1,BTA023521.1,BTA011591.1,BTA008635.1,BTA005418.1,BTA005950.1,BTA017093.1,BTA022020.1,BTA025695.1,BTA010834.1,BTA001364.1,BTA025540.3,BTA022528.1,BTA000036.2,BTA017507.1,BTA016708.1,BTA004620.1;su…
GO:0036459	ubiquitinyl hydrolase activity	molecular_function	0.26752	1	35	8211	56	14362	BTA021481.1,BTA005181.1,BTA029382.1,BTA001994.1,BTA024107.1,BTA022730.1,BTA007767.1,BTA025713.1,BTA010461.1,BTA016236.1,BTA024481.1;support_id=CUFF100.531.1,BTA014771.2,BTA000796.2,BTA010529.1,BTA017507.1;support_id=CUFF74.627.2,BTA024041.1,BTA021664.1,BTA022468.1,BTA020681.1,BTA011911.1,BTA005235.1;support_id=CUFF22.705.1,BTA016121.1,BTA003406.1,BTA010518.1,BTA009305.1,BTA003395.1,BTA002261.4,BT…
GO:0044724	single-organism carbohydrate catabolic process	biological_process	0.26874	1	23	8211	36	14362	BTA000518.1,BTA011219.1,BTA029569.1,BTA013293.1,BTA004841.1,BTA018371.1,BTA018016.1,BTA018000.1,BTA020575.1,BTA018111.1,BTA010938.1,BTA020438.1,BTA012723.1,BTA030010.1,BTA013295.1,BTA012322.1,BTA010951.1,BTA027927.1,BTA022589.4,BTA001602.1,BTA023498.1,BTA001527.1,BTA024733.1
GO:0070011	peptidase activity, acting on L-amino acid peptides	molecular_function	0.26963	1	518	8211	889	14362	BTA017069.1,BTA016813.2,BTA029860.1,BTA005889.1,BTA018759.1,BTA016818.1,BTA010495.1,BTA020889.1,BTA007665.1,BTA021302.1,BTA020552.1,BTA027178.1,BTA030200.1,BTA012781.1,BTA017981.1,BTA002843.1,BTA013026.1,BTA004408.1,BTA002734.1,BTA022261.1,BTA027461.1,BTA009929.1,BTA003046.3,BTA003960.1,BTA027262.1,BTA023808.1,BTA019154.1,BTA025552.2,BTA018573.1,BTA009991.1,BTA005636.1,BTA016030.1,BTA027016.1,BTA…
GO:0019953	sexual reproduction	biological_process	0.2706	1	36	8211	58	14362	BTA028744.1;support_id=CUFF117.740.2,BTA012946.1;support_id=CUFF54.424.1,BTA014782.1;support_id=CUFF61.626.1,BTA029395.1,BTA016017.1,BTA023255.1,BTA008534.1,BTA013650.1,BTA029918.1,BTA009730.1,BTA020698.1,BTA016485.1;support_id=CUFF71.200.1,BTA003784.1;support_id=CUFF17.316.1,BTA023871.1,BTA014297.1,BTA014089.3,BTA005885.1,BTA003554.1,BTA026573.1,BTA017116.1;support_id=CUFF73.378.1,BTA021039.1;su…
GO:0045502	dynein binding	molecular_function	0.27084	1	23	8211	36	14362	BTA001991.1,BTA014044.3,BTA022427.3,BTA026578.1,BTA023997.1;support_id=CUFF98.537.1,BTA001627.1,BTA002151.1,BTA026755.1,BTA003076.1,BTA011067.1,BTA022920.1,BTA026579.1,BTA004204.1,BTA016782.1,BTA011241.1,BTA013767.1,BTA028217.4,BTA018973.1,BTA020008.2,BTA008788.2,BTA029183.1,BTA004034.1,BTA010379.1
GO:0009161	ribonucleoside monophosphate metabolic process	biological_process	0.27108	1	83	8211	138	14362	BTA029569.1,BTA018445.1,BTA006464.1,BTA018716.1,BTA011219.1,BTA000518.1,BTA028178.1,BTA009805.1,BTA018016.1,BTA020575.1,BTA005669.2,BTA002304.1,BTA020438.1,BTA018494.1,BTA004526.1,BTA030010.1,BTA009445.1,BTA005254.1,BTA013611.1,BTA000827.1,BTA016664.1,BTA016180.1,BTA030198.1,BTA019460.1,BTA001602.1,BTA006772.1,BTA017353.1,BTA018678.1,BTA019276.1,BTA008141.1,BTA021666.1,BTA001461.2,BTA018319.1,BTA…
GO:0003779	actin binding	molecular_function	0.27185	1	80	8211	133	14362	BTA027630.1,BTA023997.1;support_id=CUFF98.537.1,BTA000443.2,BTA014286.1,BTA000409.3,BTA015410.1,BTA017732.1,BTA001998.1,BTA029375.1,BTA021071.1,BTA005874.1,BTA029101.1;support_id=CUFF119.58.1,BTA001331.1;support_id=CUFF5.63.2,BTA011291.1,BTA016849.1,BTA029127.1,BTA012269.1,BTA026396.1,BTA010963.1,BTA024614.1,BTA009214.2;support_id=CUFF39.389.2,BTA021039.1;support_id=CUFF87.585.1,BTA006304.1,BTA02…
GO:0006753	nucleoside phosphate metabolic process	biological_process	0.27242	1	161	8211	272	14362	BTA019460.1,BTA001602.1,BTA006772.1,BTA010323.1,BTA030198.1,BTA016664.1,BTA016599.1,BTA005254.1,BTA013611.1,BTA017259.1,BTA030010.1,BTA025675.1,BTA020438.1,BTA018494.1,BTA026738.1,BTA010489.1,BTA020575.1,BTA005669.2,BTA021924.1,BTA018016.1,BTA001543.1,BTA027970.1,BTA023898.1,BTA009805.1,BTA029569.1,BTA018445.1,BTA011219.1,BTA000518.1,BTA026871.1,BTA019097.1,BTA001802.1,BTA010212.1,BTA023447.1,BTA…
GO:0000096	sulfur amino acid metabolic process	biological_process	0.27291	1	9	8211	13	14362	BTA026200.1,BTA024221.1,BTA027931.1,BTA022235.1,BTA001337.1,BTA024495.1,BTA009165.1,BTA009481.1,BTA021922.1
GO:0004482	mRNA (guanine-N7-)-methyltransferase activity	molecular_function	0.27468	1	9	8211	13	14362	BTA012794.1,BTA022998.1,BTA002035.1,BTA011527.1,BTA022999.1,BTA021525.1,BTA003671.1,BTA007334.1,BTA015349.1
GO:0009218	pyrimidine ribonucleotide metabolic process	biological_process	0.27585	1	4	8211	5	14362	BTA027970.1,BTA021666.1,BTA002013.1,BTA002736.1
GO:0009220	pyrimidine ribonucleotide biosynthetic process	biological_process	0.27585	1	4	8211	5	14362	BTA021666.1,BTA027970.1,BTA002013.1,BTA002736.1
GO:0034655	nucleobase-containing compound catabolic process	biological_process	0.27632	1	30	8211	48	14362	BTA015072.1,BTA020702.2,BTA021860.1,BTA021589.1,BTA002399.1,BTA000214.1,BTA003560.1,BTA008367.1,BTA019494.1,BTA019408.1,BTA021303.1,BTA013410.1,BTA017547.1,BTA014720.1,BTA007170.1,BTA024003.1,BTA027630.1,BTA025199.1,BTA007645.1,BTA008360.1,BTA002011.1,BTA019013.1,BTA010317.1,BTA002872.1,BTA022196.1,BTA012602.1,BTA023447.1,BTA018787.1,BTA020465.1,BTA001802.1
GO:0019069	viral capsid assembly	biological_process	0.27638	1	15	8211	23	14362	BTA017197.1,BTA024129.1,BTA000947.1,BTA012160.1,BTA013836.1,BTA004745.1,BTA004526.1,BTA005545.1,BTA006836.1,BTA018494.1,BTA016233.1,BTA024172.1,BTA021174.1,BTA026114.1;support_id=CUFF107.558.1,BTA016240.1
GO:0044270	cellular nitrogen compound catabolic process	biological_process	0.27666	1	43	8211	70	14362	BTA018743.1,BTA001802.1,BTA020465.1,BTA010317.1,BTA002872.1,BTA007388.2,BTA018787.1,BTA023447.1,BTA012602.1,BTA001319.1,BTA007645.1,BTA025199.1,BTA024003.1,BTA007170.1,BTA017094.1,BTA021303.1,BTA014720.1,BTA016610.1,BTA017547.1,BTA026055.1,BTA023144.1,BTA008367.1,BTA011256.1,BTA008540.1,BTA015072.1,BTA021589.1,BTA002399.1,BTA000687.1,BTA001993.1,BTA022196.1,BTA002011.1,BTA008360.1,BTA019013.1,BTA…
GO:0043085	positive regulation of catalytic activity	biological_process	0.27787	1	12	8211	18	14362	BTA017901.1,BTA010751.1,BTA000461.1,BTA026575.1,BTA011187.2,BTA019417.1,BTA008360.1,BTA020360.1,BTA027630.1,BTA004295.1,BTA010971.1,BTA013731.1
GO:0009020	tRNA (guanosine-2'-O-)-methyltransferase activity	molecular_function	0.28124	1	4	8211	5	14362	BTA010286.1,BTA025682.1,BTA009349.1,BTA017917.1
GO:0001664	G-protein coupled receptor binding	molecular_function	0.28132	1	9	8211	13	14362	BTA014929.1,BTA028592.1,BTA003531.1,BTA017365.1,BTA026817.3,BTA014805.1,BTA014925.1,BTA007659.1,BTA020319.1
GO:0016628	oxidoreductase activity, acting on the CH-CH group of donors, NAD or NADP as acceptor	molecular_function	0.28157	1	37	8211	60	14362	BTA021906.3,BTA026756.1;support_id=CUFF109.596.1,BTA022215.1,BTA003577.1,BTA014798.1,BTA018438.1,BTA006067.1;support_id=CUFF26.309.1,BTA009855.1,BTA018333.1,BTA020890.1,BTA018090.1,BTA000425.1,BTA020199.1;support_id=CUFF84.171.1,BTA011434.1,BTA025709.1,BTA024695.1,BTA027042.1,BTA018285.1,BTA022288.1,BTA023144.1,BTA006928.1,BTA017774.1,BTA000549.1,BTA022324.1,BTA027848.1,BTA012257.4,BTA007016.1,BT…
GO:0046903	secretion	biological_process	0.28355	1	40	8211	65	14362	BTA030085.1,BTA010999.1,BTA010521.1;support_id=CUFF44.309.1,BTA018490.1,BTA009423.1,BTA012946.1;support_id=CUFF54.424.1,BTA027064.1;support_id=CUFF111.431.2,BTA009471.2,BTA010994.1,BTA017543.2,BTA021707.1,BTA020552.1,BTA003546.1,BTA021667.1,BTA018896.1,BTA001615.1,BTA029918.1,BTA011739.1,BTA018069.1;support_id=CUFF76.115.1,BTA023827.1,BTA017590.1,BTA022072.1,BTA010456.1;support_id=CUFF44.141.1,BT…
GO:0008982	protein-N(PI)-phosphohistidine-sugar phosphotransferase activity	molecular_function	0.28356	1	15	8211	23	14362	BTA019610.1,BTA029996.1;support_id=CUFF123.242.1,BTA021021.1,BTA004069.1;support_id=CUFF18.495.3,BTA017120.1;support_id=CUFF73.385.1,BTA003893.1,BTA013135.1,BTA020719.1;support_id=CUFF86.420.1,BTA011719.1,BTA022242.1,BTA017134.1,BTA021471.1;support_id=CUFF89.562.1,BTA014903.1;support_id=CUFF62.196.1,BTA013597.2;support_id=CUFF56.748.1,BTA005826.1
GO:0009791	post-embryonic development	biological_process	0.28421	1	9	8211	13	14362	BTA020999.2,BTA021548.3,BTA002839.1,BTA020405.1,BTA017507.1;support_id=CUFF74.627.2,BTA009307.1;support_id=CUFF39.693.1,BTA029209.1,BTA016484.1,BTA006428.1;support_id=CUFF27.358.1
GO:0016538	cyclin-dependent protein serine/threonine kinase regulator activity	molecular_function	0.28429	1	7	8211	10	14362	BTA015555.1,BTA025250.1,BTA005598.1,BTA014884.1,BTA008132.1,BTA027912.1,BTA015556.1
GO:0033218	amide binding	molecular_function	0.28443	1	12	8211	18	14362	BTA022310.1,BTA009828.1,BTA022145.1,BTA004651.1,BTA008029.1,BTA009266.1,BTA010524.1,BTA018029.1,BTA010453.1,BTA028176.1,BTA003678.2,BTA024732.1
GO:0033646	host intracellular part	cellular_component	0.2851	1	27	8211	43	14362	BTA026503.1,BTA016527.1,BTA013836.1,BTA012855.1,BTA011881.1,BTA021422.2,BTA002577.1,BTA017886.1,BTA024560.1,BTA015123.1;support_id=CUFF62.581.1,BTA012679.1,BTA020771.1,BTA026114.1;support_id=CUFF107.558.1,BTA019193.1,BTA024445.1;support_id=CUFF100.445.1,BTA001940.1,BTA023292.1,BTA002989.1,BTA020043.1,BTA019191.1,BTA005969.2;support_id=CUFF26.24.1,BTA026927.1,BTA015339.1,BTA022070.1,BTA019195.2,BT…
GO:0043656	intracellular region of host	cellular_component	0.2851	1	27	8211	43	14362	BTA024560.1,BTA017886.1,BTA021422.2,BTA002577.1,BTA020771.1,BTA012679.1,BTA015123.1;support_id=CUFF62.581.1,BTA013836.1,BTA012855.1,BTA011881.1,BTA016527.1,BTA026503.1,BTA019195.2,BTA016485.1;support_id=CUFF71.200.1,BTA014720.1,BTA026927.1,BTA005969.2;support_id=CUFF26.24.1,BTA019191.1,BTA022070.1,BTA015339.1,BTA024445.1;support_id=CUFF100.445.1,BTA001940.1,BTA023292.1,BTA002989.1,BTA020043.1,BTA…
GO:0008745	N-acetylmuramoyl-L-alanine amidase activity	molecular_function	0.28552	1	4	8211	5	14362	BTA022361.1,BTA004819.1,BTA013031.1,BTA028059.1
GO:0004356	glutamate-ammonia ligase activity	molecular_function	0.28574	1	4	8211	5	14362	BTA024389.2,BTA021950.1;support_id=CUFF92.56.1,BTA002356.3,BTA001638.1
GO:0016211	ammonia ligase activity	molecular_function	0.28574	1	4	8211	5	14362	BTA021950.1;support_id=CUFF92.56.1,BTA024389.2,BTA002356.3,BTA001638.1
GO:0016880	acid-ammonia (or amide) ligase activity	molecular_function	0.28574	1	4	8211	5	14362	BTA021950.1;support_id=CUFF92.56.1,BTA024389.2,BTA001638.1,BTA002356.3
GO:0004665	prephenate dehydrogenase (NADP+) activity	molecular_function	0.28612	1	4	8211	5	14362	BTA020199.1;support_id=CUFF84.171.1,BTA018333.1,BTA006067.1;support_id=CUFF26.309.1,BTA018285.1
GO:0006571	tyrosine biosynthetic process	biological_process	0.28612	1	4	8211	5	14362	BTA018333.1,BTA020199.1;support_id=CUFF84.171.1,BTA018285.1,BTA006067.1;support_id=CUFF26.309.1
GO:0008977	prephenate dehydrogenase activity	molecular_function	0.28612	1	4	8211	5	14362	BTA020199.1;support_id=CUFF84.171.1,BTA018333.1,BTA006067.1;support_id=CUFF26.309.1,BTA018285.1
GO:0044456	synapse part	cellular_component	0.28665	1	4	8211	5	14362	BTA001627.1,BTA018577.1,BTA017790.1,BTA009344.1
GO:0048786	presynaptic active zone	cellular_component	0.28665	1	4	8211	5	14362	BTA009344.1,BTA001627.1,BTA018577.1,BTA017790.1
GO:0097458	neuron part	cellular_component	0.28665	1	4	8211	5	14362	BTA009344.1,BTA018577.1,BTA001627.1,BTA017790.1
GO:0098793	presynapse	cellular_component	0.28665	1	4	8211	5	14362	BTA001627.1,BTA018577.1,BTA017790.1,BTA009344.1
GO:0019385	methanogenesis, from acetate	biological_process	0.28668	1	4	8211	5	14362	BTA027388.3,BTA003067.1,BTA011835.4;support_id=CUFF50.280.2,BTA000547.1
GO:0009116	nucleoside metabolic process	biological_process	0.28692	1	117	8211	197	14362	BTA013295.1,BTA010951.1,BTA004354.1,BTA007575.2,BTA022589.4,BTA023625.3,BTA027033.1,BTA002013.1,BTA020955.1,BTA004882.1,BTA014276.1,BTA020155.1,BTA026055.1,BTA018000.1,BTA013225.1,BTA004581.1,BTA009264.1,BTA008424.1,BTA010938.1,BTA018111.1,BTA011358.1;support_id=CUFF48.12.4,BTA021703.1,BTA018900.1,BTA019450.1,BTA008540.1,BTA013293.1,BTA002736.1,BTA030038.1,BTA004841.1,BTA011193.1,BTA009531.1,BTA0…
GO:1901657	glycosyl compound metabolic process	biological_process	0.28692	1	117	8211	197	14362	BTA007709.1,BTA018319.1,BTA013656.1,BTA029898.1,BTA019276.1,BTA006290.1,BTA018678.1,BTA017353.1,BTA021534.2;support_id=CUFF89.776.2,BTA024634.1,BTA024733.1,BTA011186.2,BTA000460.1,BTA010212.1,BTA012322.1,BTA017267.1,BTA012427.1,BTA009447.1,BTA007645.1,BTA013064.1,BTA022212.1,BTA012314.1,BTA005584.1,BTA020035.1,BTA020575.1,BTA027230.3,BTA005669.2,BTA001486.1,BTA018016.1,BTA019045.1,BTA027970.1,BTA…
GO:0009416	response to light stimulus	biological_process	0.28741	1	4	8211	5	14362	BTA019206.1,BTA014027.1,BTA029930.1,BTA011934.1
GO:0016779	nucleotidyltransferase activity	molecular_function	0.28772	1	262	8211	447	14362	BTA021134.1,BTA020219.1,BTA009412.1,BTA010495.1,BTA004716.1,BTA014903.1,BTA025310.1,BTA003359.1,BTA024756.1,BTA024957.1,BTA027391.1,BTA025003.1,BTA000977.1,BTA026728.3,BTA026871.1,BTA002290.1,BTA027818.1,BTA004618.1,BTA029887.1,BTA020755.1,BTA022543.1,BTA021693.1,BTA023861.4,BTA019154.1,BTA013156.1,BTA013049.1,BTA021525.1,BTA015857.1,BTA029565.1,BTA011244.1,BTA025544.1,BTA008454.1,BTA023336.1,BTA…
GO:0008544	epidermis development	biological_process	0.28789	1	4	8211	5	14362	BTA003189.1,BTA011360.1,BTA019408.1,BTA016724.2
GO:0006334	nucleosome assembly	biological_process	0.28795	1	12	8211	18	14362	BTA023383.1,BTA015620.1;support_id=CUFF66.335.2,BTA001244.1,BTA023627.1;support_id=CUFF97.322.1,BTA021199.1,BTA001350.1,BTA026719.2,BTA020083.1,BTA026707.1,BTA000844.1,BTA025480.1,BTA003814.2
GO:0031497	chromatin assembly	biological_process	0.28795	1	12	8211	18	14362	BTA023627.1;support_id=CUFF97.322.1,BTA023383.1,BTA001244.1,BTA015620.1;support_id=CUFF66.335.2,BTA026719.2,BTA021199.1,BTA001350.1,BTA026707.1,BTA020083.1,BTA025480.1,BTA000844.1,BTA003814.2
GO:0034728	nucleosome organization	biological_process	0.28795	1	12	8211	18	14362	BTA026707.1,BTA020083.1,BTA003814.2,BTA025480.1,BTA000844.1,BTA023627.1;support_id=CUFF97.322.1,BTA023383.1,BTA015620.1;support_id=CUFF66.335.2,BTA001244.1,BTA026719.2,BTA021199.1,BTA001350.1
GO:0005539	glycosaminoglycan binding	molecular_function	0.2881	1	4	8211	5	14362	BTA029995.1,BTA029209.1,BTA014834.1,BTA014158.2
GO:0006777	Mo-molybdopterin cofactor biosynthetic process	biological_process	0.2883	1	12	8211	18	14362	BTA009697.1,BTA024801.1;support_id=CUFF102.342.2,BTA021861.1,BTA018414.1,BTA018439.1,BTA000628.1,BTA000543.1,BTA023379.1,BTA012496.1,BTA018437.1,BTA019715.1,BTA003933.1
GO:0019720	Mo-molybdopterin cofactor metabolic process	biological_process	0.2883	1	12	8211	18	14362	BTA018414.1,BTA000628.1,BTA018439.1,BTA009697.1,BTA024801.1;support_id=CUFF102.342.2,BTA021861.1,BTA012496.1,BTA018437.1,BTA003933.1,BTA019715.1,BTA000543.1,BTA023379.1
GO:0043161	proteasome-mediated ubiquitin-dependent protein catabolic process	biological_process	0.28867	1	15	8211	23	14362	BTA012316.2,BTA006611.1,BTA011364.1,BTA020758.1,BTA024032.1,BTA029871.1,BTA000265.1,BTA026146.1,BTA029455.2,BTA010606.2,BTA029361.1,BTA023810.1,BTA028895.1,BTA022487.1,BTA027828.1
GO:0005986	sucrose biosynthetic process	biological_process	0.28901	1	4	8211	5	14362	BTA023266.1,BTA010487.1,BTA007659.1,BTA022684.1
GO:0050307	sucrose-phosphate phosphatase activity	molecular_function	0.28901	1	4	8211	5	14362	BTA022684.1,BTA010487.1,BTA007659.1,BTA023266.1
GO:0042886	amide transport	biological_process	0.28919	1	4	8211	5	14362	BTA002006.1,BTA029541.4,BTA026016.1;support_id=CUFF107.343.1,BTA026406.1
GO:0016780	phosphotransferase activity, for other substituted phosphate groups	molecular_function	0.28951	1	12	8211	18	14362	BTA010982.1,BTA022602.1,BTA024519.3,BTA023896.1,BTA015794.1,BTA005490.1,BTA001112.1,BTA005033.1,BTA029530.1,BTA021531.3,BTA013419.1,BTA001428.1
GO:0042578	phosphoric ester hydrolase activity	molecular_function	0.28996	1	166	8211	281	14362	BTA021303.1,BTA001293.2;support_id=CUFF4.803.1,BTA000821.1,BTA021994.1,BTA001467.1,BTA024732.1,BTA024811.1,BTA020976.1,BTA029565.1,BTA023769.1,BTA005121.2;support_id=CUFF22.375.1,BTA006612.1,BTA000651.1,BTA024292.2,BTA023866.1,BTA016175.1,BTA009410.1,BTA012897.1,BTA029919.1,BTA010670.1,BTA030183.1,BTA002264.1,BTA004728.1,BTA003128.1,BTA007419.1,BTA021189.1,BTA019531.1,BTA011326.1,BTA028591.1;supp…
GO:0015696	ammonium transport	biological_process	0.29009	1	4	8211	5	14362	BTA001799.1,BTA004487.1,BTA018319.1,BTA009016.1
GO:0019835	cytolysis	biological_process	0.29054	1	15	8211	23	14362	BTA014915.1,BTA007170.1,BTA024835.2,BTA021589.1,BTA003359.1,BTA027640.1,BTA017699.1;support_id=CUFF75.308.2,BTA001721.1;support_id=CUFF6.298.1,BTA017481.1,BTA029568.1,BTA006023.1,BTA003441.1,BTA026809.1,BTA018368.1,BTA030011.1
GO:0004363	glutathione synthase activity	molecular_function	0.29081	1	4	8211	5	14362	BTA028311.1,BTA019858.1;support_id=CUFF83.17.1,BTA007023.1,BTA023405.1
GO:1901361	organic cyclic compound catabolic process	biological_process	0.29085	1	44	8211	72	14362	BTA018743.1,BTA001802.1,BTA020465.1,BTA023447.1,BTA018787.1,BTA012602.1,BTA002872.1,BTA010317.1,BTA007388.2,BTA001319.1,BTA007645.1,BTA025199.1,BTA017094.1,BTA024003.1,BTA007170.1,BTA014720.1,BTA017547.1,BTA016610.1,BTA021303.1,BTA023144.1,BTA008367.1,BTA010671.1,BTA026055.1,BTA008540.1,BTA011256.1,BTA021589.1,BTA002399.1,BTA015072.1,BTA000687.1,BTA001993.1,BTA022196.1,BTA019013.1,BTA002011.1,BTA…
GO:0016814	hydrolase activity, acting on carbon-nitrogen (but not peptide) bonds, in cyclic amidines	molecular_function	0.29092	1	12	8211	18	14362	BTA023378.1,BTA026394.3,BTA021420.1,BTA007645.1,BTA028918.1,BTA023747.1,BTA026584.1,BTA026871.1,BTA007709.1,BTA009476.1,BTA021422.2,BTA008141.1
GO:0016125	sterol metabolic process	biological_process	0.29107	1	4	8211	5	14362	BTA028305.1,BTA002988.4,BTA026578.1,BTA002970.1
GO:0008479	queuine tRNA-ribosyltransferase activity	molecular_function	0.29117	1	4	8211	5	14362	BTA025865.1,BTA023615.1,BTA000460.1,BTA011186.2
GO:0004375	glycine dehydrogenase (decarboxylating) activity	molecular_function	0.29131	1	4	8211	5	14362	BTA004851.1,BTA007004.1,BTA023383.1,BTA023647.1
GO:0006546	glycine catabolic process	biological_process	0.29131	1	4	8211	5	14362	BTA023647.1,BTA023383.1,BTA007004.1,BTA004851.1
GO:0009071	serine family amino acid catabolic process	biological_process	0.29131	1	4	8211	5	14362	BTA023647.1,BTA023383.1,BTA007004.1,BTA004851.1
GO:0016642	oxidoreductase activity, acting on the CH-NH2 group of donors, disulfide as acceptor	molecular_function	0.29131	1	4	8211	5	14362	BTA007004.1,BTA004851.1,BTA023647.1,BTA023383.1
GO:0016740	transferase activity	molecular_function	0.29153	1	1309	8211	2266	14362	BTA013225.1,BTA007172.1,BTA013833.1,BTA020230.1,BTA028250.1,BTA017975.1,BTA027667.1,BTA001194.1,BTA022057.1;support_id=CUFF92.252.1,BTA017000.3,BTA018529.1,BTA024038.1,BTA023405.1,BTA001112.1;support_id=CUFF4.282.2,BTA009250.1,BTA007388.2,BTA028253.1,BTA021019.1,BTA021981.1,BTA022589.4,BTA019954.1,BTA012101.1,BTA014367.4,BTA019374.1,BTA019840.1,BTA002673.1;support_id=CUFF11.600.1,BTA010530.1,BTA0…
GO:0004806	triglyceride lipase activity	molecular_function	0.29179	1	4	8211	5	14362	BTA026510.1,BTA011559.1,BTA005535.1,BTA018758.1
GO:0010921	regulation of phosphatase activity	biological_process	0.29199	1	4	8211	5	14362	BTA017803.1,BTA023874.1,BTA023873.1,BTA022297.1
GO:0046527	glucosyltransferase activity	molecular_function	0.29254	1	21	8211	33	14362	BTA028567.1,BTA002009.1;support_id=CUFF8.431.1,BTA017185.1,BTA005356.1;support_id=CUFF23.303.1,BTA008896.1;support_id=CUFF37.723.2,BTA009935.1,BTA001448.2;support_id=CUFF5.371.1,BTA006413.1;support_id=CUFF27.326.1,BTA009129.1,BTA017915.2,BTA021471.1;support_id=CUFF89.562.1,BTA014870.1,BTA027046.1,BTA018055.1,BTA026799.3;support_id=CUFF109.705.3,BTA009126.1,BTA017163.1,BTA012641.1,BTA009208.1,BTA0…
GO:0009292	genetic transfer	biological_process	0.29308	1	4	8211	5	14362	BTA020207.1,BTA011476.1,BTA023926.1,BTA000293.1
GO:0031224	intrinsic component of membrane	cellular_component	0.29313	1	1119	8211	1936	14362	BTA000526.1,BTA020198.1,BTA006378.1,BTA015631.1,BTA001239.1,BTA002103.1,BTA020666.1,BTA013788.1,BTA016990.1,BTA009154.1,BTA016718.1,BTA018110.1,BTA029176.1,BTA007472.1,BTA023376.1,BTA029705.1,BTA011986.1,BTA017060.1,BTA026152.2,BTA024922.1,BTA005077.1,BTA009486.1;support_id=CUFF41.32.1,BTA015301.1,BTA005234.2,BTA005197.1;support_id=CUFF22.573.2,BTA022037.1,BTA009126.1,BTA027356.1,BTA015751.1;supp…
GO:0004749	ribose phosphate diphosphokinase activity	molecular_function	0.29321	1	4	8211	5	14362	BTA024519.3,BTA013419.1,BTA017259.1,BTA001112.1;support_id=CUFF4.282.2
GO:0043903	regulation of symbiosis, encompassing mutualism through parasitism	biological_process	0.29328	1	4	8211	5	14362	BTA018955.2,BTA019180.1,BTA024646.1;support_id=CUFF102.1.1,BTA023680.1
GO:0050792	regulation of viral process	biological_process	0.29328	1	4	8211	5	14362	BTA023680.1,BTA024646.1;support_id=CUFF102.1.1,BTA019180.1,BTA018955.2
GO:0044815	DNA packaging complex	cellular_component	0.29335	1	12	8211	18	14362	BTA023627.1;support_id=CUFF97.322.1,BTA014118.1,BTA002147.1;support_id=CUFF9.207.1,BTA001244.1,BTA026719.2,BTA021199.1,BTA005961.1,BTA020719.1;support_id=CUFF86.420.1,BTA028744.1;support_id=CUFF117.740.2,BTA003814.2,BTA026715.1,BTA000844.1
GO:0005886	plasma membrane	cellular_component	0.29401	1	120	8211	202	14362	BTA014529.1;support_id=CUFF60.636.1,BTA000415.1,BTA007971.1,BTA009942.1;support_id=CUFF42.456.1,BTA000946.1,BTA012852.1,BTA011360.1,BTA024329.1;support_id=CUFF100.92.1,BTA010276.1;support_id=CUFF43.403.2,BTA020719.1;support_id=CUFF86.420.1,BTA006281.1;support_id=CUFF27.40.1,BTA017353.1,BTA015041.1,BTA011292.1,BTA015878.1;support_id=CUFF68.52.1,BTA028363.1,BTA010169.1;support_id=CUFF43.115.1,BTA01…
GO:0009986	cell surface	cellular_component	0.29444	1	4	8211	5	14362	BTA017356.1,BTA016004.1,BTA025951.2,BTA010672.1
GO:0017006	protein-tetrapyrrole linkage	biological_process	0.29456	1	4	8211	5	14362	BTA026265.1;support_id=CUFF108.147.1,BTA019306.1,BTA013790.1,BTA002708.1
GO:0009126	purine nucleoside monophosphate metabolic process	biological_process	0.29537	1	82	8211	137	14362	BTA008141.1,BTA018319.1,BTA013656.1,BTA001461.2,BTA007709.1,BTA017353.1,BTA018678.1,BTA019276.1,BTA009447.1,BTA017267.1,BTA012322.1,BTA012427.1,BTA024733.1,BTA021534.2;support_id=CUFF89.776.2,BTA024634.1,BTA020035.1,BTA013064.1,BTA018016.1,BTA005669.2,BTA020575.1,BTA018445.1,BTA029569.1,BTA006464.1,BTA018716.1,BTA000518.1,BTA011219.1,BTA028178.1,BTA009805.1,BTA016664.1,BTA016180.1,BTA030198.1,BTA…
GO:0009167	purine ribonucleoside monophosphate metabolic process	biological_process	0.29537	1	82	8211	137	14362	BTA022589.4,BTA010951.1,BTA013295.1,BTA020955.1,BTA004882.1,BTA023625.3,BTA027033.1,BTA009264.1,BTA010938.1,BTA018111.1,BTA004581.1,BTA026055.1,BTA020155.1,BTA018000.1,BTA008540.1,BTA019450.1,BTA009531.1,BTA030038.1,BTA011193.1,BTA004841.1,BTA013293.1,BTA011358.1;support_id=CUFF48.12.4,BTA021703.1,BTA023498.1,BTA001527.1,BTA027927.1,BTA013968.1,BTA007848.1,BTA011581.1,BTA025566.1,BTA014855.1,BTA0…
GO:0010827	regulation of glucose transport	biological_process	0.29558	1	4	8211	5	14362	BTA021967.3,BTA022391.3,BTA002626.1,BTA015627.1
GO:0010829	negative regulation of glucose transport	biological_process	0.29558	1	4	8211	5	14362	BTA002626.1,BTA022391.3,BTA021967.3,BTA015627.1
GO:0015758	glucose transport	biological_process	0.29558	1	4	8211	5	14362	BTA015627.1,BTA002626.1,BTA022391.3,BTA021967.3
GO:0046323	glucose import	biological_process	0.29558	1	4	8211	5	14362	BTA002626.1,BTA022391.3,BTA021967.3,BTA015627.1
GO:0046324	regulation of glucose import	biological_process	0.29558	1	4	8211	5	14362	BTA015627.1,BTA021967.3,BTA022391.3,BTA002626.1
GO:0046325	negative regulation of glucose import	biological_process	0.29558	1	4	8211	5	14362	BTA021967.3,BTA022391.3,BTA002626.1,BTA015627.1
GO:0017119	Golgi transport complex	cellular_component	0.29611	1	15	8211	23	14362	BTA003582.1,BTA014903.1;support_id=CUFF62.196.1,BTA019232.1,BTA023054.1,BTA018814.1,BTA011951.1,BTA001615.1,BTA004975.1,BTA022531.1,BTA011739.1,BTA014793.3,BTA013247.5,BTA017120.1;support_id=CUFF73.385.1,BTA020851.1,BTA007524.1
GO:0007618	mating	biological_process	0.29671	1	4	8211	5	14362	BTA017116.1;support_id=CUFF73.378.1,BTA018177.1,BTA015878.1;support_id=CUFF68.52.1,BTA016485.1;support_id=CUFF71.200.1
GO:0009123	nucleoside monophosphate metabolic process	biological_process	0.30052	1	86	8211	144	14362	BTA019276.1,BTA017353.1,BTA019457.2,BTA018678.1,BTA007709.1,BTA013656.1,BTA018319.1,BTA001461.2,BTA021666.1,BTA008141.1,BTA013064.1,BTA020035.1,BTA024634.1,BTA021534.2;support_id=CUFF89.776.2,BTA024733.1,BTA012322.1,BTA017267.1,BTA012427.1,BTA009447.1,BTA009805.1,BTA006464.1,BTA018716.1,BTA011219.1,BTA000518.1,BTA018445.1,BTA029569.1,BTA028178.1,BTA005669.2,BTA020575.1,BTA018016.1,BTA004526.1,BTA…
GO:0022610	biological adhesion	biological_process	0.30288	1	86	8211	144	14362	BTA018162.1,BTA009554.1,BTA009059.1,BTA025147.1,BTA008468.1,BTA015386.1,BTA024259.1,BTA000239.1;support_id=CUFF2.194.1,BTA016721.2;support_id=CUFF71.849.1,BTA025550.1,BTA010817.1;support_id=CUFF46.150.1,BTA017222.1,BTA028038.1,BTA000263.1,BTA013577.1,BTA019845.1,BTA023383.1,BTA007837.2,BTA026879.1,BTA008366.1,BTA020209.1,BTA014153.1,BTA011894.1,BTA029394.1,BTA000767.2,BTA023021.1,BTA001148.1,BTA0…
GO:0007631	feeding behavior	biological_process	0.30495	1	2	8211	2	14362	BTA019112.3,BTA019417.1
GO:0009991	response to extracellular stimulus	biological_process	0.30507	1	19	8211	30	14362	BTA019084.1,BTA002910.1,BTA002995.1,BTA015759.1,BTA006078.1,BTA021174.1,BTA023919.1,BTA005527.1,BTA029862.1,BTA007891.1,BTA001350.1,BTA002901.1,BTA013426.1,BTA020207.1,BTA002917.1,BTA028770.1,BTA019417.1,BTA026299.1,BTA009484.1
GO:0031668	cellular response to extracellular stimulus	biological_process	0.30507	1	19	8211	30	14362	BTA019084.1,BTA002995.1,BTA002910.1,BTA015759.1,BTA021174.1,BTA023919.1,BTA006078.1,BTA007891.1,BTA005527.1,BTA029862.1,BTA002901.1,BTA001350.1,BTA019417.1,BTA028770.1,BTA026299.1,BTA013426.1,BTA020207.1,BTA002917.1,BTA009484.1
GO:0071496	cellular response to external stimulus	biological_process	0.30507	1	19	8211	30	14362	BTA028770.1,BTA019417.1,BTA026299.1,BTA002917.1,BTA013426.1,BTA020207.1,BTA009484.1,BTA007891.1,BTA005527.1,BTA029862.1,BTA002901.1,BTA001350.1,BTA015759.1,BTA021174.1,BTA023919.1,BTA006078.1,BTA019084.1,BTA002995.1,BTA002910.1
GO:0098805	whole membrane	cellular_component	0.30514	1	97	8211	163	14362	BTA004762.1;support_id=CUFF21.387.1,BTA024826.3,BTA027426.1,BTA027338.1,BTA016737.1,BTA003619.1,BTA022916.1,BTA023291.1,BTA024806.1,BTA002761.1,BTA017169.1,BTA018830.1,BTA027473.2,BTA007640.1,BTA023731.1,BTA005419.2,BTA026295.2,BTA028040.1;support_id=CUFF115.8.1,BTA001188.2,BTA026859.1,BTA017093.1,BTA023521.1,BTA011591.1,BTA008635.1,BTA002944.1,BTA029464.1,BTA002604.1,BTA028186.3,BTA006777.1,BTA0…
GO:0042618	poly-hydroxybutyrate metabolic process	biological_process	0.3065	1	2	8211	2	14362	BTA026237.1,BTA016168.1
GO:0042619	poly-hydroxybutyrate biosynthetic process	biological_process	0.3065	1	2	8211	2	14362	BTA026237.1,BTA016168.1
GO:1901440	poly(hydroxyalkanoate) metabolic process	biological_process	0.3065	1	2	8211	2	14362	BTA016168.1,BTA026237.1
GO:1901441	poly(hydroxyalkanoate) biosynthetic process	biological_process	0.3065	1	2	8211	2	14362	BTA016168.1,BTA026237.1
GO:0043531	ADP binding	molecular_function	0.30676	1	38	8211	62	14362	BTA001461.2,BTA026265.1,BTA000821.1,BTA024732.1,BTA020738.1,BTA019624.1,BTA023828.1,BTA021970.1,BTA008129.2,BTA018316.1,BTA026695.3,BTA012267.1,BTA010320.1,BTA024292.2,BTA024075.1,BTA018414.1,BTA015065.1,BTA027847.1,BTA002843.1,BTA003128.1,BTA025059.1,BTA013336.2,BTA003158.1,BTA022315.1,BTA013344.1,BTA012566.1,BTA011326.1,BTA018546.1,BTA016221.1,BTA003623.1,BTA018420.1,BTA016043.1,BTA024801.1;sup…
GO:1901575	organic substance catabolic process	biological_process	0.30883	1	181	8211	308	14362	BTA018809.1,BTA022196.1,BTA001527.1,BTA023498.1,BTA012059.1,BTA004816.1,BTA027630.1,BTA001601.1,BTA019013.1,BTA026146.1,BTA006928.1,BTA013297.1,BTA002011.1,BTA023810.1,BTA010198.1,BTA029559.1,BTA010606.2,BTA013031.1,BTA025453.1,BTA007004.1,BTA028967.3,BTA024032.1,BTA028059.1,BTA010385.1;support_id=CUFF43.665.2,BTA012602.1,BTA002872.1,BTA024041.1,BTA004314.2,BTA010317.1,BTA027828.1,BTA020534.1,BTA…
GO:0007610	behavior	biological_process	0.30935	1	7	8211	10	14362	BTA007615.1,BTA019417.1,BTA019112.3,BTA014843.1,BTA016958.3,BTA017116.1;support_id=CUFF73.378.1,BTA018177.1
GO:0006289	nucleotide-excision repair	biological_process	0.30974	1	16	8211	25	14362	BTA027172.1,BTA017725.1,BTA009991.1,BTA008191.1;support_id=CUFF34.631.1,BTA024394.1,BTA010606.2,BTA028895.1,BTA017740.1,BTA021967.3,BTA000415.1,BTA006611.1,BTA020758.1,BTA024032.1,BTA000265.1,BTA029871.1,BTA016848.2;support_id=CUFF72.270.1
GO:0004357	glutamate-cysteine ligase activity	molecular_function	0.31045	1	2	8211	2	14362	BTA022077.1,BTA013757.1
GO:0016051	carbohydrate biosynthetic process	biological_process	0.31058	1	66	8211	110	14362	BTA001161.1,BTA000526.1,BTA024733.1,BTA026134.1,BTA002416.3,BTA023266.1,BTA002977.1,BTA023385.1,BTA021471.1;support_id=CUFF89.562.1,BTA007659.1,BTA030182.1,BTA001159.1,BTA009126.1,BTA021696.1,BTA011219.1,BTA000518.1,BTA024550.1,BTA020283.1,BTA008896.1;support_id=CUFF37.723.2,BTA009935.1,BTA011916.2,BTA000563.1,BTA018431.1,BTA007283.1,BTA010487.1,BTA019370.1,BTA012641.1,BTA011383.1,BTA002021.1;sup…
GO:0016657	oxidoreductase activity, acting on NAD(P)H, nitrogenous group as acceptor	molecular_function	0.31093	1	2	8211	2	14362	BTA022091.1,BTA004820.1
GO:0033739	preQ1 synthase activity	molecular_function	0.31093	1	2	8211	2	14362	BTA022091.1,BTA004820.1
GO:0006370	7-methylguanosine mRNA capping	biological_process	0.31205	1	10	8211	15	14362	BTA007334.1,BTA011479.1,BTA003671.1,BTA022999.1,BTA021525.1,BTA012794.1,BTA022998.1,BTA002035.1,BTA027813.1,BTA005585.1
GO:0004392	heme oxygenase (decyclizing) activity	molecular_function	0.31228	1	2	8211	2	14362	BTA018743.1,BTA011256.1
GO:0006788	heme oxidation	biological_process	0.31228	1	2	8211	2	14362	BTA018743.1,BTA011256.1
GO:0006265	DNA topological change	biological_process	0.3136	1	25	8211	40	14362	BTA014290.1,BTA029896.1,BTA006277.2;support_id=CUFF27.25.1,BTA023159.1;support_id=CUFF95.632.1,BTA009783.2;support_id=CUFF42.60.1,BTA009887.1;support_id=CUFF42.234.1,BTA006475.1;support_id=CUFF28.23.1,BTA014288.1,BTA001704.1,BTA019322.1;support_id=CUFF80.266.2,BTA009554.1;support_id=CUFF41.186.1,BTA006472.1,BTA026466.1,BTA025880.1,BTA013519.2,BTA011361.1,BTA000067.1;support_id=CUFF1.157.1,BTA0023…
GO:0030042	actin filament depolymerization	biological_process	0.31457	1	7	8211	10	14362	BTA029737.1,BTA027151.1,BTA029098.1,BTA012679.1,BTA011796.1,BTA021474.1,BTA029084.1
GO:0030834	regulation of actin filament depolymerization	biological_process	0.31457	1	7	8211	10	14362	BTA029737.1,BTA027151.1,BTA029098.1,BTA012679.1,BTA011796.1,BTA029084.1,BTA021474.1
GO:0030835	negative regulation of actin filament depolymerization	biological_process	0.31457	1	7	8211	10	14362	BTA029098.1,BTA029737.1,BTA027151.1,BTA029084.1,BTA021474.1,BTA012679.1,BTA011796.1
GO:0030837	negative regulation of actin filament polymerization	biological_process	0.31457	1	7	8211	10	14362	BTA011796.1,BTA012679.1,BTA029084.1,BTA021474.1,BTA029737.1,BTA027151.1,BTA029098.1
GO:0031333	negative regulation of protein complex assembly	biological_process	0.31457	1	7	8211	10	14362	BTA029098.1,BTA029737.1,BTA027151.1,BTA021474.1,BTA029084.1,BTA012679.1,BTA011796.1
GO:0032272	negative regulation of protein polymerization	biological_process	0.31457	1	7	8211	10	14362	BTA029098.1,BTA027151.1,BTA029737.1,BTA029084.1,BTA021474.1,BTA011796.1,BTA012679.1
GO:0051261	protein depolymerization	biological_process	0.31457	1	7	8211	10	14362	BTA029084.1,BTA021474.1,BTA012679.1,BTA011796.1,BTA029098.1,BTA027151.1,BTA029737.1
GO:0051693	actin filament capping	biological_process	0.31457	1	7	8211	10	14362	BTA021474.1,BTA029084.1,BTA011796.1,BTA012679.1,BTA029098.1,BTA027151.1,BTA029737.1
GO:1901879	regulation of protein depolymerization	biological_process	0.31457	1	7	8211	10	14362	BTA012679.1,BTA011796.1,BTA021474.1,BTA029084.1,BTA029737.1,BTA027151.1,BTA029098.1
GO:1901880	negative regulation of protein depolymerization	biological_process	0.31457	1	7	8211	10	14362	BTA029098.1,BTA029737.1,BTA027151.1,BTA021474.1,BTA029084.1,BTA011796.1,BTA012679.1
GO:0001518	voltage-gated sodium channel complex	cellular_component	0.31471	1	2	8211	2	14362	BTA000415.1,BTA015269.1
GO:0005248	voltage-gated sodium channel activity	molecular_function	0.31471	1	2	8211	2	14362	BTA000415.1,BTA015269.1
GO:0034706	sodium channel complex	cellular_component	0.31471	1	2	8211	2	14362	BTA000415.1,BTA015269.1
GO:0007591	molting cycle, chitin-based cuticle	biological_process	0.31482	1	7	8211	10	14362	BTA001707.1,BTA001705.2,BTA007461.1,BTA026503.1,BTA001470.1,BTA019193.1,BTA019191.1
GO:0008255	ecdysis-triggering hormone activity	molecular_function	0.31482	1	7	8211	10	14362	BTA001705.2,BTA001707.1,BTA019191.1,BTA019193.1,BTA001470.1,BTA026503.1,BTA007461.1
GO:0018990	ecdysis, chitin-based cuticle	biological_process	0.31482	1	7	8211	10	14362	BTA001705.2,BTA001707.1,BTA019191.1,BTA001470.1,BTA019193.1,BTA026503.1,BTA007461.1
GO:0022404	molting cycle process	biological_process	0.31482	1	7	8211	10	14362	BTA001705.2,BTA001707.1,BTA019191.1,BTA001470.1,BTA019193.1,BTA026503.1,BTA007461.1
GO:0042303	molting cycle	biological_process	0.31482	1	7	8211	10	14362	BTA001705.2,BTA001707.1,BTA019191.1,BTA026503.1,BTA007461.1,BTA019193.1,BTA001470.1
GO:0015103	inorganic anion transmembrane transporter activity	molecular_function	0.31502	1	25	8211	40	14362	BTA015153.2,BTA003273.1,BTA026016.1,BTA017564.1,BTA011169.1,BTA007830.1,BTA007576.2,BTA015080.1,BTA029912.1,BTA016991.1,BTA001708.1,BTA004721.1,BTA019817.2,BTA007458.1,BTA011168.1,BTA028313.1,BTA011969.1,BTA028919.1,BTA012955.2,BTA028045.1,BTA001779.2,BTA010679.1,BTA011965.1,BTA019047.1,BTA003961.1
GO:0016861	intramolecular oxidoreductase activity, interconverting aldoses and ketoses	molecular_function	0.31537	1	10	8211	15	14362	BTA024733.1,BTA013295.1,BTA001310.1,BTA025864.1,BTA001940.1,BTA004841.1,BTA013293.1,BTA025284.1,BTA011219.1,BTA000518.1
GO:0019049	evasion or tolerance of host defenses by virus	biological_process	0.31541	1	2	8211	2	14362	BTA011942.1,BTA005669.2
GO:0009887	organ morphogenesis	biological_process	0.31575	1	2	8211	2	14362	BTA009721.1,BTA024729.1
GO:0042475	odontogenesis of dentin-containing tooth	biological_process	0.31575	1	2	8211	2	14362	BTA024729.1,BTA009721.1
GO:0042476	odontogenesis	biological_process	0.31575	1	2	8211	2	14362	BTA024729.1,BTA009721.1
GO:0006537	glutamate biosynthetic process	biological_process	0.31616	1	7	8211	10	14362	BTA010256.1,BTA006928.1,BTA001758.2,BTA029066.1,BTA023533.1,BTA027797.1,BTA008897.1
GO:0043650	dicarboxylic acid biosynthetic process	biological_process	0.31616	1	7	8211	10	14362	BTA010256.1,BTA006928.1,BTA001758.2,BTA027797.1,BTA029066.1,BTA008897.1,BTA023533.1
GO:0019251	anaerobic cobalamin biosynthetic process	biological_process	0.31723	1	2	8211	2	14362	BTA010997.1,BTA016313.1
GO:0010498	proteasomal protein catabolic process	biological_process	0.31819	1	16	8211	25	14362	BTA029361.1,BTA022487.1,BTA027828.1,BTA012316.2,BTA026146.1,BTA010606.2,BTA023810.1,BTA028895.1,BTA025453.1,BTA006611.1,BTA011364.1,BTA020758.1,BTA024032.1,BTA029871.1,BTA000265.1,BTA029455.2
GO:0019722	calcium-mediated signaling	biological_process	0.31861	1	2	8211	2	14362	BTA000369.1,BTA030187.1
GO:0019932	second-messenger-mediated signaling	biological_process	0.31861	1	2	8211	2	14362	BTA030187.1,BTA000369.1
GO:0019238	cyclohydrolase activity	molecular_function	0.31905	1	7	8211	10	14362	BTA026871.1,BTA021420.1,BTA007709.1,BTA026394.3,BTA023378.1,BTA021422.2,BTA008141.1
GO:0016645	oxidoreductase activity, acting on the CH-NH group of donors	molecular_function	0.31928	1	23	8211	37	14362	BTA013420.1,BTA003108.1,BTA021578.1,BTA027184.1,BTA026200.1,BTA001485.1,BTA022091.1,BTA003107.1,BTA009165.1,BTA004820.1,BTA006162.1,BTA024597.1,BTA005504.1,BTA004819.1,BTA021922.1,BTA027848.1,BTA024535.1,BTA017266.1,BTA007430.1,BTA022235.1,BTA023680.1,BTA024335.1,BTA023319.1
GO:0031341	regulation of cell killing	biological_process	0.31949	1	2	8211	2	14362	BTA027176.1,BTA026265.1;support_id=CUFF108.147.1
GO:0031342	negative regulation of cell killing	biological_process	0.31949	1	2	8211	2	14362	BTA027176.1,BTA026265.1;support_id=CUFF108.147.1
GO:0009877	nodulation	biological_process	0.31975	1	16	8211	25	14362	BTA009307.1;support_id=CUFF39.693.1,BTA020207.1,BTA029209.1,BTA019323.1,BTA006428.1;support_id=CUFF27.358.1,BTA019370.1,BTA021548.3,BTA020999.2,BTA002839.1,BTA023385.1,BTA001161.1,BTA011383.1,BTA017005.1,BTA020405.1,BTA017507.1;support_id=CUFF74.627.2,BTA028771.1
GO:0000390	spliceosomal complex disassembly	biological_process	0.3198	1	2	8211	2	14362	BTA024866.1,BTA029690.1
GO:0005684	U2-type spliceosomal complex	cellular_component	0.3198	1	2	8211	2	14362	BTA029690.1,BTA024866.1
GO:0032988	ribonucleoprotein complex disassembly	biological_process	0.3198	1	2	8211	2	14362	BTA029690.1,BTA024866.1
GO:0071008	U2-type post-mRNA release spliceosomal complex	cellular_component	0.3198	1	2	8211	2	14362	BTA024866.1,BTA029690.1
GO:0071014	post-mRNA release spliceosomal complex	cellular_component	0.3198	1	2	8211	2	14362	BTA024866.1,BTA029690.1
GO:0031640	killing of cells of other organism	biological_process	0.32005	1	10	8211	15	14362	BTA017481.1,BTA001721.1;support_id=CUFF6.298.1,BTA027640.1,BTA003359.1,BTA024835.2,BTA014915.1,BTA018368.1,BTA003441.1,BTA026809.1,BTA006023.1
GO:0044364	disruption of cells of other organism	biological_process	0.32005	1	10	8211	15	14362	BTA026809.1,BTA003441.1,BTA006023.1,BTA018368.1,BTA024835.2,BTA003359.1,BTA014915.1,BTA027640.1,BTA001721.1;support_id=CUFF6.298.1,BTA017481.1
GO:0005516	calmodulin binding	molecular_function	0.3202	1	10	8211	15	14362	BTA015645.1,BTA010563.1;support_id=CUFF44.410.1,BTA020896.1;support_id=CUFF87.166.1,BTA006766.1,BTA002696.3;support_id=CUFF11.666.1,BTA001423.1,BTA024935.1;support_id=CUFF102.647.1,BTA012061.1,BTA000202.1,BTA024656.1;support_id=CUFF102.39.1
GO:0042720	mitochondrial inner membrane peptidase complex	cellular_component	0.32037	1	2	8211	2	14362	BTA023808.1,BTA026982.1
GO:0017004	cytochrome complex assembly	biological_process	0.3205	1	19	8211	30	14362	BTA006281.1,BTA003223.3,BTA020067.1,BTA016946.1,BTA009127.1,BTA015080.1,BTA011510.1,BTA026297.1,BTA029165.1,BTA023135.1;support_id=CUFF95.537.1,BTA012079.1,BTA024027.1,BTA017043.1,BTA019512.1,BTA013790.1,BTA002020.1,BTA017980.1,BTA008548.1;support_id=CUFF36.181.1,BTA000520.1
GO:0017153	sodium:dicarboxylate symporter activity	molecular_function	0.32078	1	10	8211	15	14362	BTA006033.1,BTA023952.1,BTA029738.1,BTA002965.1,BTA023425.1,BTA023628.1,BTA011100.1,BTA029737.1,BTA006031.1,BTA025433.1
GO:0004506	squalene monooxygenase activity	molecular_function	0.32128	1	7	8211	10	14362	BTA005848.1,BTA000674.1,BTA023304.1,BTA018355.1,BTA009264.1,BTA003937.1,BTA025539.1
GO:0004623	phospholipase A2 activity	molecular_function	0.32138	1	2	8211	2	14362	BTA019814.1,BTA000365.1
GO:0032102	negative regulation of response to external stimulus	biological_process	0.32144	1	2	8211	2	14362	BTA019417.1,BTA011942.1
GO:0006432	phenylalanyl-tRNA aminoacylation	biological_process	0.32148	1	10	8211	15	14362	BTA025999.1,BTA029178.1,BTA019923.1,BTA022669.1,BTA005077.1,BTA021071.1,BTA008789.1,BTA013768.1,BTA026992.1,BTA016502.1
GO:0051189	prosthetic group metabolic process	biological_process	0.32232	1	13	8211	20	14362	BTA019715.1,BTA003933.1,BTA012496.1,BTA018437.1,BTA023379.1,BTA000543.1,BTA018414.1,BTA000628.1,BTA018439.1,BTA009704.1,BTA021861.1,BTA009697.1,BTA024801.1;support_id=CUFF102.342.2
GO:0043484	regulation of RNA splicing	biological_process	0.32283	1	2	8211	2	14362	BTA009661.1,BTA029394.1
GO:0048024	regulation of mRNA splicing, via spliceosome	biological_process	0.32283	1	2	8211	2	14362	BTA009661.1,BTA029394.1
GO:0050684	regulation of mRNA processing	biological_process	0.32283	1	2	8211	2	14362	BTA009661.1,BTA029394.1
GO:1903311	regulation of mRNA metabolic process	biological_process	0.32283	1	2	8211	2	14362	BTA009661.1,BTA029394.1
GO:0008138	protein tyrosine/serine/threonine phosphatase activity	molecular_function	0.32293	1	19	8211	30	14362	BTA020961.1,BTA001984.1,BTA025771.1,BTA022473.2,BTA016012.1,BTA010836.1,BTA008112.1,BTA026589.1,BTA026259.1,BTA020976.1,BTA009463.1,BTA004728.1,BTA011776.1,BTA026302.1,BTA017520.1,BTA022922.1,BTA025313.1,BTA025600.1,BTA002487.1
GO:0071806	protein transmembrane transport	biological_process	0.32345	1	13	8211	20	14362	BTA020719.1;support_id=CUFF86.420.1,BTA006128.1,BTA006914.1,BTA015643.1,BTA010256.1,BTA024009.1,BTA017543.2,BTA008897.1,BTA001603.1,BTA018812.1,BTA021471.1;support_id=CUFF89.562.1,BTA009058.1,BTA018830.1
GO:0015238	drug transmembrane transporter activity	molecular_function	0.32347	1	7	8211	10	14362	BTA012552.1,BTA006880.1,BTA011388.1,BTA020481.1,BTA019770.2,BTA028080.1,BTA010213.1
GO:0090484	drug transporter activity	molecular_function	0.32347	1	7	8211	10	14362	BTA006880.1,BTA011388.1,BTA012552.1,BTA010213.1,BTA020481.1,BTA019770.2,BTA028080.1
GO:0010008	endosome membrane	cellular_component	0.32359	1	7	8211	10	14362	BTA011625.1,BTA002147.1;support_id=CUFF9.207.1,BTA023731.1,BTA002944.1,BTA026859.1,BTA005964.1,BTA018619.1
GO:0050570	4-hydroxythreonine-4-phosphate dehydrogenase activity	molecular_function	0.32384	1	2	8211	2	14362	BTA001872.1,BTA022326.1
GO:0010207	photosystem II assembly	biological_process	0.3242	1	2	8211	2	14362	BTA002673.1;support_id=CUFF11.600.1,BTA002481.1
GO:0004803	transposase activity	molecular_function	0.32457	1	30	8211	49	14362	BTA026696.1,BTA020988.1,BTA029848.1,BTA008904.1,BTA028685.1,BTA015339.1,BTA007206.1,BTA016631.1,BTA020207.1,BTA013812.1,BTA008896.1;support_id=CUFF37.723.2,BTA021095.1,BTA027677.1,BTA018959.1,BTA015115.1,BTA009570.1,BTA013115.1,BTA020585.1,BTA029430.1,BTA023759.1,BTA001765.1,BTA002996.1,BTA028822.1;support_id=CUFF118.205.1,BTA015723.1,BTA007318.1,BTA020473.1,BTA003090.1,BTA020967.1,BTA015332.1,BT…
GO:0009404	toxin metabolic process	biological_process	0.32461	1	10	8211	15	14362	BTA030085.1;support_id=CUFF124.220.1,BTA011509.1,BTA007633.1,BTA001075.1,BTA029073.1,BTA018361.1,BTA021176.1,BTA020549.1,BTA017135.1,BTA029409.1
GO:0000156	phosphorelay response regulator activity	molecular_function	0.32505	1	2	8211	2	14362	BTA024549.1,BTA013252.1
GO:0030410	nicotianamine synthase activity	molecular_function	0.32576	1	2	8211	2	14362	BTA013172.2;support_id=CUFF55.203.2,BTA009091.1
GO:0030417	nicotianamine metabolic process	biological_process	0.32576	1	2	8211	2	14362	BTA009091.1,BTA013172.2;support_id=CUFF55.203.2
GO:0030418	nicotianamine biosynthetic process	biological_process	0.32576	1	2	8211	2	14362	BTA013172.2;support_id=CUFF55.203.2,BTA009091.1
GO:0031214	biomineral tissue development	biological_process	0.32639	1	2	8211	2	14362	BTA009721.1,BTA004745.1
GO:0070167	regulation of biomineral tissue development	biological_process	0.32639	1	2	8211	2	14362	BTA004745.1,BTA009721.1
GO:0005506	iron ion binding	molecular_function	0.32696	1	125	8211	212	14362	BTA021422.2,BTA006638.1,BTA000317.1,BTA006667.3;support_id=CUFF28.521.2,BTA009040.1,BTA003273.1,BTA029613.1,BTA021385.1,BTA027574.1,BTA012802.1,BTA025209.1,BTA000796.2,BTA012723.1,BTA006641.1,BTA012514.1,BTA021418.1,BTA011870.3,BTA016009.1,BTA018094.1,BTA009804.1,BTA005827.1,BTA023134.1,BTA001219.1,BTA017161.1,BTA023543.1,BTA002763.2,BTA003509.1,BTA028520.1,BTA003274.4,BTA000114.1,BTA010504.1,BTA…
GO:0006566	threonine metabolic process	biological_process	0.32803	1	2	8211	2	14362	BTA022766.1,BTA028762.2;support_id=CUFF118.30.4
GO:0009088	threonine biosynthetic process	biological_process	0.32803	1	2	8211	2	14362	BTA022766.1,BTA028762.2;support_id=CUFF118.30.4
GO:0015099	nickel cation transmembrane transporter activity	molecular_function	0.32812	1	2	8211	2	14362	BTA028505.1,BTA029209.1
GO:0015675	nickel cation transport	biological_process	0.32812	1	2	8211	2	14362	BTA028505.1,BTA029209.1
GO:0035444	nickel cation transmembrane transport	biological_process	0.32812	1	2	8211	2	14362	BTA028505.1,BTA029209.1
GO:0004175	endopeptidase activity	molecular_function	0.32813	1	341	8211	586	14362	BTA016664.1,BTA016818.1,BTA010495.1,BTA004716.1,BTA023259.1,BTA029860.1,BTA016813.2,BTA024457.1,BTA019083.1,BTA005889.1,BTA005661.1,BTA030200.1,BTA027178.1,BTA004418.1,BTA010712.1,BTA020889.1,BTA006156.1,BTA007665.1,BTA024656.1;support_id=CUFF102.39.1,BTA003046.3,BTA017219.1;support_id=CUFF73.689.1,BTA002734.1,BTA022261.1,BTA023482.1,BTA030163.1,BTA002843.1,BTA004408.1,BTA006428.1,BTA014529.1;sup…
GO:0090307	mitotic spindle assembly	biological_process	0.32839	1	2	8211	2	14362	BTA021350.1,BTA019751.1
GO:1902850	microtubule cytoskeleton organization involved in mitosis	biological_process	0.32839	1	2	8211	2	14362	BTA021350.1,BTA019751.1
GO:0031704	apelin receptor binding	molecular_function	0.32853	1	2	8211	2	14362	BTA026817.3,BTA020319.1
GO:0008107	galactoside 2-alpha-L-fucosyltransferase activity	molecular_function	0.32869	1	2	8211	2	14362	BTA015209.1,BTA007388.2
GO:0031127	alpha-(1,2)-fucosyltransferase activity	molecular_function	0.32869	1	2	8211	2	14362	BTA015209.1,BTA007388.2
GO:0019491	ectoine biosynthetic process	biological_process	0.3287	1	2	8211	2	14362	BTA010926.1,BTA009600.1
GO:0033990	ectoine synthase activity	molecular_function	0.3287	1	2	8211	2	14362	BTA009600.1,BTA010926.1
GO:0042399	ectoine metabolic process	biological_process	0.3287	1	2	8211	2	14362	BTA009600.1,BTA010926.1
GO:0016866	intramolecular transferase activity	molecular_function	0.32899	1	26	8211	42	14362	BTA021673.1,BTA009704.1,BTA009818.1,BTA023898.1,BTA018663.1,BTA026860.2,BTA000230.1,BTA026285.1,BTA002216.1,BTA021526.1,BTA021836.3,BTA026738.1,BTA018371.1,BTA021199.1,BTA007283.1,BTA012793.1,BTA006445.1,BTA027191.1,BTA001895.1,BTA005534.1,BTA014293.1,BTA010351.1,BTA003814.2,BTA009430.1,BTA008055.1,BTA004854.1
GO:0016021	integral component of membrane	cellular_component	0.33	1	1114	8211	1931	14362	BTA014095.1,BTA006397.1,BTA024816.1,BTA013611.1,BTA000475.1,BTA010513.1,BTA002358.1,BTA024033.1,BTA028625.1,BTA000116.1,BTA014215.1,BTA019413.2,BTA013029.1,BTA010670.1,BTA000692.1,BTA019207.1,BTA023269.1;support_id=CUFF96.269.1,BTA022394.4;support_id=CUFF93.65.1,BTA002687.1,BTA011850.1,BTA024481.1;support_id=CUFF100.531.1,BTA024354.1,BTA022487.1,BTA000404.1,BTA003937.1,BTA020896.1;support_id=CUFF…
GO:0006888	ER to Golgi vesicle-mediated transport	biological_process	0.33038	1	27	8211	44	14362	BTA030126.1,BTA003400.1,BTA003933.1,BTA012508.1,BTA009557.1,BTA002761.1,BTA022528.1,BTA025540.3,BTA004620.1;support_id=CUFF20.433.2,BTA017507.1,BTA016708.1,BTA022367.1,BTA016737.1,BTA029464.1,BTA003619.1,BTA014778.1,BTA007279.1,BTA008635.1,BTA027426.1,BTA023521.1,BTA011591.1,BTA005950.1,BTA005418.1,BTA025695.1,BTA022564.1,BTA010834.1,BTA017518.1
GO:0030493	bacteriochlorophyll metabolic process	biological_process	0.33112	1	2	8211	2	14362	BTA007292.1,BTA003085.1;support_id=CUFF13.76.1
GO:0030494	bacteriochlorophyll biosynthetic process	biological_process	0.33112	1	2	8211	2	14362	BTA007292.1,BTA003085.1;support_id=CUFF13.76.1
GO:0004643	phosphoribosylaminoimidazolecarboxamide formyltransferase activity	molecular_function	0.33125	1	2	8211	2	14362	BTA026871.1,BTA023378.1
GO:0008410	CoA-transferase activity	molecular_function	0.33131	1	2	8211	2	14362	BTA008414.1,BTA008321.1
GO:0030416	methylamine metabolic process	biological_process	0.33136	1	2	8211	2	14362	BTA007837.2,BTA025989.1
GO:1901160	primary amino compound metabolic process	biological_process	0.33136	1	2	8211	2	14362	BTA007837.2,BTA025989.1
GO:0018836	alkylmercury lyase activity	molecular_function	0.33136	1	2	8211	2	14362	BTA026697.1,BTA026606.2
GO:0018941	organomercury metabolic process	biological_process	0.33136	1	2	8211	2	14362	BTA026606.2,BTA026697.1
GO:0018942	organometal metabolic process	biological_process	0.33136	1	2	8211	2	14362	BTA026606.2,BTA026697.1
GO:0046413	organomercury catabolic process	biological_process	0.33136	1	2	8211	2	14362	BTA026606.2,BTA026697.1
GO:0003714	transcription corepressor activity	molecular_function	0.33141	1	2	8211	2	14362	BTA026445.2,BTA002983.1
GO:0003917	DNA topoisomerase type I activity	molecular_function	0.33176	1	2	8211	2	14362	BTA014290.1,BTA014288.1
GO:0008536	Ran GTPase binding	molecular_function	0.33182	1	13	8211	20	14362	BTA024646.1;support_id=CUFF102.1.1,BTA030119.1,BTA030118.1,BTA024785.1,BTA020436.1,BTA000098.1,BTA016711.1,BTA024290.1,BTA010522.1,BTA029664.2,BTA006940.1,BTA028946.1,BTA003237.1
GO:0001700	embryonic development via the syncytial blastoderm	biological_process	0.3319	1	2	8211	2	14362	BTA025620.1;support_id=CUFF105.400.2,BTA006162.1
GO:0009792	embryo development ending in birth or egg hatching	biological_process	0.3319	1	2	8211	2	14362	BTA025620.1;support_id=CUFF105.400.2,BTA006162.1
GO:0060478	acrosomal vesicle exocytosis	biological_process	0.33197	1	2	8211	2	14362	BTA029918.1,BTA011571.1
GO:0005137	interleukin-5 receptor binding	molecular_function	0.332	1	2	8211	2	14362	BTA014047.1,BTA014730.1
GO:0030254	protein secretion by the type III secretion system	biological_process	0.33212	1	2	8211	2	14362	BTA015643.1,BTA017543.2
GO:0030257	type III protein secretion system complex	cellular_component	0.33212	1	2	8211	2	14362	BTA017543.2,BTA015643.1
GO:0019008	molybdopterin synthase complex	cellular_component	0.33212	1	2	8211	2	14362	BTA019715.1,BTA018439.1
GO:0009291	unidirectional conjugation	biological_process	0.33215	1	2	8211	2	14362	BTA000293.1,BTA011476.1
GO:0008883	glutamyl-tRNA reductase activity	molecular_function	0.33216	1	2	8211	2	14362	BTA027880.1,BTA004765.1
GO:0007601	visual perception	biological_process	0.33216	1	2	8211	2	14362	BTA029534.1,BTA020339.1
GO:0030553	cGMP binding	molecular_function	0.33216	1	2	8211	2	14362	BTA020339.1,BTA029534.1
GO:0050953	sensory perception of light stimulus	biological_process	0.33216	1	2	8211	2	14362	BTA020339.1,BTA029534.1
GO:0001533	cornified envelope	cellular_component	0.33216	1	2	8211	2	14362	BTA028363.1,BTA005557.1
GO:0003885	D-arabinono-1,4-lactone oxidase activity	molecular_function	0.33216	1	2	8211	2	14362	BTA006059.1;support_id=CUFF26.294.1,BTA020193.1;support_id=CUFF84.153.1
GO:0005335	serotonin:sodium symporter activity	molecular_function	0.33216	1	2	8211	2	14362	BTA001331.1;support_id=CUFF5.63.2,BTA002008.1;support_id=CUFF8.429.1
GO:0007160	cell-matrix adhesion	biological_process	0.33216	1	2	8211	2	14362	BTA013077.1,BTA008387.2
GO:0008504	monoamine transmembrane transporter activity	molecular_function	0.33216	1	2	8211	2	14362	BTA001331.1;support_id=CUFF5.63.2,BTA002008.1;support_id=CUFF8.429.1
GO:0008907	integrase activity	molecular_function	0.33216	1	2	8211	2	14362	BTA023014.1,BTA023015.1
GO:0010324	membrane invagination	biological_process	0.33216	1	2	8211	2	14362	BTA004762.1;support_id=CUFF21.387.1,BTA020272.1
GO:0015222	serotonin transmembrane transporter activity	molecular_function	0.33216	1	2	8211	2	14362	BTA001331.1;support_id=CUFF5.63.2,BTA002008.1;support_id=CUFF8.429.1
GO:0016237	microautophagy	biological_process	0.33216	1	2	8211	2	14362	BTA020272.1,BTA004762.1;support_id=CUFF21.387.1
GO:0016604	nuclear body	cellular_component	0.33216	1	2	8211	2	14362	BTA024471.1,BTA002021.1;support_id=CUFF8.494.2
GO:0016607	nuclear speck	cellular_component	0.33216	1	2	8211	2	14362	BTA002021.1;support_id=CUFF8.494.2,BTA024471.1
GO:0016899	oxidoreductase activity, acting on the CH-OH group of donors, oxygen as acceptor	molecular_function	0.33216	1	2	8211	2	14362	BTA020193.1;support_id=CUFF84.153.1,BTA006059.1;support_id=CUFF26.294.1
GO:0020002	host cell plasma membrane	cellular_component	0.33216	1	2	8211	2	14362	BTA021917.1,BTA002147.1;support_id=CUFF9.207.1
GO:0030174	regulation of DNA-dependent DNA replication initiation	biological_process	0.33216	1	2	8211	2	14362	BTA009066.1,BTA010658.1
GO:0031589	cell-substrate adhesion	biological_process	0.33216	1	2	8211	2	14362	BTA008387.2,BTA013077.1
GO:0032297	negative regulation of DNA-dependent DNA replication initiation	biological_process	0.33216	1	2	8211	2	14362	BTA009066.1,BTA010658.1
GO:0032865	ERMES complex	cellular_component	0.33216	1	2	8211	2	14362	BTA020719.1;support_id=CUFF86.420.1,BTA027388.3
GO:0034448	EGO complex	cellular_component	0.33216	1	2	8211	2	14362	BTA020272.1,BTA004762.1;support_id=CUFF21.387.1
GO:0034450	ubiquitin-ubiquitin ligase activity	molecular_function	0.33216	1	2	8211	2	14362	BTA016024.1,BTA010351.1
GO:0044156	host cell junction	cellular_component	0.33216	1	2	8211	2	14362	BTA002147.1;support_id=CUFF9.207.1,BTA021917.1
GO:0044163	host cytoskeleton	cellular_component	0.33216	1	2	8211	2	14362	BTA026927.1,BTA001940.1
GO:0044232	organelle membrane contact site	cellular_component	0.33216	1	2	8211	2	14362	BTA027388.3,BTA020719.1;support_id=CUFF86.420.1
GO:0044233	ER-mitochondrion membrane contact site	cellular_component	0.33216	1	2	8211	2	14362	BTA020719.1;support_id=CUFF86.420.1,BTA027388.3
GO:0046782	regulation of viral transcription	biological_process	0.33216	1	2	8211	2	14362	BTA018955.2,BTA024646.1;support_id=CUFF102.1.1
GO:0047200	tetrahydrodipicolinate N-acetyltransferase activity	molecular_function	0.33216	1	2	8211	2	14362	BTA000945.1,BTA023366.1
GO:0071107	response to parathyroid hormone	biological_process	0.33216	1	2	8211	2	14362	BTA002515.1,BTA026299.1
GO:0075519	microtubule-dependent intracellular transport of viral material	biological_process	0.33216	1	2	8211	2	14362	BTA001940.1,BTA026927.1
GO:0075521	microtubule-dependent intracellular transport of viral material towards nucleus	biological_process	0.33216	1	2	8211	2	14362	BTA026927.1,BTA001940.1
GO:0075606	transport of viral material towards nucleus	biological_process	0.33216	1	2	8211	2	14362	BTA001940.1,BTA026927.1
GO:0075733	intracellular transport of virus	biological_process	0.33216	1	2	8211	2	14362	BTA026927.1,BTA001940.1
GO:0090544	BAF-type complex	cellular_component	0.33216	1	2	8211	2	14362	BTA010595.2,BTA010178.1
GO:1901618	organic hydroxy compound transmembrane transporter activity	molecular_function	0.33216	1	2	8211	2	14362	BTA002008.1;support_id=CUFF8.429.1,BTA001331.1;support_id=CUFF5.63.2
GO:1902534	single-organism membrane invagination	biological_process	0.33216	1	2	8211	2	14362	BTA020272.1,BTA004762.1;support_id=CUFF21.387.1
GO:1902583	multi-organism intracellular transport	biological_process	0.33216	1	2	8211	2	14362	BTA001940.1,BTA026927.1
GO:1903900	regulation of viral life cycle	biological_process	0.33216	1	2	8211	2	14362	BTA018955.2,BTA024646.1;support_id=CUFF102.1.1
GO:0004677	DNA-dependent protein kinase activity	molecular_function	0.33216	1	2	8211	2	14362	BTA000767.2,BTA007644.1
GO:0019321	pentose metabolic process	biological_process	0.33216	1	2	8211	2	14362	BTA025946.1,BTA018121.1
GO:0019566	arabinose metabolic process	biological_process	0.33216	1	2	8211	2	14362	BTA025946.1,BTA018121.1
GO:0046373	L-arabinose metabolic process	biological_process	0.33216	1	2	8211	2	14362	BTA018121.1,BTA025946.1
GO:0004483	mRNA (nucleoside-2'-O-)-methyltransferase activity	molecular_function	0.33216	1	2	8211	2	14362	BTA011527.1,BTA015349.1
GO:0005523	tropomyosin binding	molecular_function	0.33216	1	2	8211	2	14362	BTA012679.1,BTA029737.1
GO:0016158	3-phytase activity	molecular_function	0.33216	1	2	8211	2	14362	BTA009554.1;support_id=CUFF41.186.1,BTA019583.1
GO:0051694	pointed-end actin filament capping	biological_process	0.33216	1	2	8211	2	14362	BTA012679.1,BTA029737.1
GO:0098742	cell-cell adhesion via plasma-membrane adhesion molecules	biological_process	0.33262	1	20	8211	32	14362	BTA013569.1,BTA026534.1,BTA017858.1,BTA024259.1,BTA015386.1,BTA008468.1,BTA028973.1,BTA016001.1,BTA013572.1,BTA011260.1,BTA011260.1;support_id=CUFF47.547.2,BTA011893.1,BTA013577.1,BTA019845.1,BTA014530.1,BTA013283.1,BTA011894.1,BTA009208.1,BTA013836.1,BTA002869.1
GO:0006511	ubiquitin-dependent protein catabolic process	biological_process	0.33664	1	44	8211	73	14362	BTA012059.1,BTA014244.1,BTA024952.1,BTA029361.1,BTA026146.1,BTA013297.1,BTA023259.1,BTA016024.1,BTA027547.1,BTA003864.1,BTA003863.1,BTA012316.2,BTA028967.3,BTA028895.1,BTA029559.1,BTA023810.1,BTA010198.1,BTA008319.1,BTA010606.2,BTA007192.1,BTA024032.1,BTA020758.1,BTA008158.1,BTA009567.2;support_id=CUFF41.222.1,BTA006611.1,BTA013289.1,BTA020534.1,BTA027828.1,BTA022487.1,BTA027569.1,BTA004314.2,BTA…
GO:0008233	peptidase activity	molecular_function	0.33717	1	544	8211	939	14362	BTA007409.1,BTA015349.1,BTA028476.1,BTA026716.2,BTA008548.1;support_id=CUFF36.181.1,BTA001994.1,BTA009436.1,BTA000523.1,BTA005475.1,BTA014700.1,BTA013897.1,BTA014964.1,BTA017995.3,BTA028039.1,BTA024646.1;support_id=CUFF102.1.1,BTA022001.1,BTA024493.1,BTA001571.2,BTA029918.1,BTA028040.1;support_id=CUFF115.8.1,BTA006367.1,BTA029378.1,BTA019761.1,BTA001282.1,BTA000414.1,BTA006924.1,BTA006788.1,BTA00…
GO:0044265	cellular macromolecule catabolic process	biological_process	0.33731	1	69	8211	116	14362	BTA020866.1,BTA013400.1,BTA017547.1,BTA025877.1,BTA011364.1,BTA021589.1,BTA002232.3,BTA000265.1,BTA029455.2,BTA018787.1,BTA020465.1,BTA022487.1,BTA027174.1,BTA013289.1,BTA010351.1,BTA024003.1,BTA007170.1,BTA007192.1,BTA008319.1,BTA028895.1,BTA013410.1,BTA009567.2;support_id=CUFF41.222.1,BTA021860.1,BTA008158.1,BTA000214.1,BTA020758.1,BTA002430.1,BTA013666.1,BTA012316.2,BTA003864.1,BTA023259.1,BTA…
GO:0030658	transport vesicle membrane	cellular_component	0.33915	1	27	8211	44	14362	BTA024826.3,BTA017518.1,BTA025695.1,BTA010834.1,BTA005950.1,BTA005418.1,BTA027426.1,BTA011591.1,BTA023521.1,BTA008635.1,BTA007279.1,BTA003619.1,BTA016737.1,BTA029464.1,BTA022916.1,BTA017507.1,BTA016708.1,BTA004620.1;support_id=CUFF20.433.2,BTA025540.3,BTA022528.1,BTA011438.1,BTA002761.1,BTA009557.1,BTA003933.1,BTA012508.1,BTA000946.1,BTA030126.1
GO:0050660	flavin adenine dinucleotide binding	molecular_function	0.33935	1	92	8211	155	14362	BTA003202.1,BTA018446.1,BTA017034.1,BTA007433.1,BTA023203.2,BTA019645.1,BTA000643.1,BTA024219.1,BTA000684.1,BTA016265.1,BTA022051.1,BTA001484.1,BTA005938.1,BTA018346.1,BTA022492.1,BTA027036.2,BTA022189.1,BTA019496.1,BTA020902.1,BTA009264.1,BTA015558.1,BTA028940.1,BTA026474.1,BTA005848.1,BTA016192.1,BTA017257.1,BTA007016.1,BTA000223.1,BTA023455.1,BTA026168.1,BTA013258.1,BTA013390.1,BTA010956.1,BTA…
GO:0009620	response to fungus	biological_process	0.34241	1	5	8211	7	14362	BTA002014.1,BTA014798.1,BTA003577.1,BTA026135.1,BTA013757.1
GO:0050832	defense response to fungus	biological_process	0.34241	1	5	8211	7	14362	BTA003577.1,BTA014798.1,BTA002014.1,BTA026135.1,BTA013757.1
GO:0006575	cellular modified amino acid metabolic process	biological_process	0.34336	1	34	8211	56	14362	BTA012179.1,BTA007023.1,BTA021550.1,BTA024000.1,BTA000545.1,BTA023680.1,BTA023319.1,BTA017094.1,BTA022543.1,BTA019858.1;support_id=CUFF83.17.1,BTA003769.1,BTA022973.1,BTA003768.1,BTA023405.1,BTA028311.1,BTA024597.1,BTA006162.1,BTA013757.1,BTA000505.1,BTA005271.1,BTA027649.1,BTA001337.1,BTA027848.1,BTA003108.1,BTA025701.1,BTA027230.3,BTA022077.1,BTA000221.1,BTA001108.1,BTA001490.1,BTA003107.1,BTA0…
GO:0007156	homophilic cell adhesion via plasma membrane adhesion molecules	biological_process	0.34341	1	17	8211	27	14362	BTA002869.1,BTA011894.1,BTA013283.1,BTA014530.1,BTA011260.1;support_id=CUFF47.547.2,BTA011893.1,BTA013577.1,BTA013572.1,BTA011260.1,BTA016001.1,BTA028973.1,BTA024259.1,BTA008468.1,BTA015386.1,BTA017858.1,BTA026534.1,BTA013569.1
GO:0008643	carbohydrate transport	biological_process	0.34477	1	30	8211	49	14362	BTA028001.1,BTA022391.3,BTA002021.1;support_id=CUFF8.494.2,BTA003887.1,BTA003893.1,BTA011496.1,BTA027783.1,BTA016273.1,BTA021021.1,BTA007223.1,BTA002476.1,BTA027850.1,BTA002626.1,BTA021471.1;support_id=CUFF89.562.1,BTA015627.1,BTA015301.1,BTA010928.1,BTA016777.1,BTA020719.1;support_id=CUFF86.420.1,BTA000563.1,BTA029097.1,BTA012343.1,BTA029581.1,BTA021967.3,BTA029083.1,BTA021721.1,BTA022242.1,BTA0…
GO:0007050	cell cycle arrest	biological_process	0.34547	1	8	8211	12	14362	BTA027912.1,BTA003167.1,BTA015556.1,BTA006966.1,BTA021856.1,BTA008132.1,BTA025250.1,BTA015555.1
GO:0046914	transition metal ion binding	molecular_function	0.34586	1	706	8211	1221	14362	BTA025017.1,BTA000873.1,BTA029507.1;support_id=CUFF121.171.1,BTA017554.2,BTA026291.1,BTA001310.1,BTA027026.1,BTA015241.1,BTA011132.1,BTA000492.1,BTA002188.1,BTA014046.1,BTA010323.1;support_id=CUFF43.498.2,BTA020719.1;support_id=CUFF86.420.1,BTA021811.1;support_id=CUFF90.568.1,BTA009438.1,BTA005226.1,BTA020672.1;support_id=CUFF86.300.1,BTA013666.1,BTA004195.1,BTA009486.1;support_id=CUFF41.32.1,BTA…
GO:0005834	heterotrimeric G-protein complex	cellular_component	0.34604	1	5	8211	7	14362	BTA010353.1,BTA010461.1,BTA004710.1,BTA012447.1,BTA000750.1
GO:0009898	cytoplasmic side of plasma membrane	cellular_component	0.34604	1	5	8211	7	14362	BTA000750.1,BTA012447.1,BTA004710.1,BTA010461.1,BTA010353.1
GO:0019897	extrinsic component of plasma membrane	cellular_component	0.34604	1	5	8211	7	14362	BTA000750.1,BTA012447.1,BTA010461.1,BTA004710.1,BTA010353.1
GO:0031234	extrinsic component of cytoplasmic side of plasma membrane	cellular_component	0.34604	1	5	8211	7	14362	BTA000750.1,BTA012447.1,BTA010461.1,BTA004710.1,BTA010353.1
GO:0098552	side of membrane	cellular_component	0.34604	1	5	8211	7	14362	BTA004710.1,BTA010461.1,BTA010353.1,BTA000750.1,BTA012447.1
GO:0098562	cytoplasmic side of membrane	cellular_component	0.34604	1	5	8211	7	14362	BTA012447.1,BTA000750.1,BTA010353.1,BTA004710.1,BTA010461.1
GO:0010959	regulation of metal ion transport	biological_process	0.34687	1	8	8211	12	14362	BTA014562.1,BTA028046.1,BTA000370.1,BTA015397.1,BTA019460.1,BTA010658.1,BTA000395.1,BTA024485.2
GO:0043269	regulation of ion transport	biological_process	0.34687	1	8	8211	12	14362	BTA000370.1,BTA015397.1,BTA028046.1,BTA014562.1,BTA024485.2,BTA000395.1,BTA010658.1,BTA019460.1
GO:0005549	odorant binding	molecular_function	0.34696	1	11	8211	17	14362	BTA008684.1,BTA007201.3,BTA010390.1,BTA012858.1,BTA006866.2,BTA026782.1,BTA024331.1,BTA003653.1,BTA011569.1,BTA024330.1,BTA000058.1
GO:0022843	voltage-gated cation channel activity	molecular_function	0.34904	1	17	8211	27	14362	BTA016017.1,BTA001361.1,BTA021955.1;support_id=CUFF92.66.2,BTA025946.1,BTA001407.1,BTA029122.3,BTA003784.1;support_id=CUFF17.316.1,BTA015269.1,BTA000415.1,BTA018121.1,BTA002708.1,BTA009784.1,BTA012852.1,BTA024445.1;support_id=CUFF100.445.1,BTA024603.1,BTA029790.1,BTA027427.1
GO:0007034	vacuolar transport	biological_process	0.35053	1	11	8211	17	14362	BTA000763.1,BTA000306.1,BTA025211.1,BTA012811.1,BTA013582.1,BTA024059.1,BTA013283.1,BTA027180.3;support_id=CUFF112.6.1,BTA009324.1,BTA019147.1,BTA013709.1
GO:0004659	prenyltransferase activity	molecular_function	0.35085	1	14	8211	22	14362	BTA019840.1,BTA002736.1,BTA000771.1,BTA024082.1,BTA006331.1,BTA007639.1,BTA024292.2,BTA021273.1,BTA006783.2,BTA010463.1,BTA012191.1,BTA026931.1,BTA000539.1,BTA028246.1
GO:0030120	vesicle coat	cellular_component	0.35093	1	31	8211	51	14362	BTA002604.1,BTA029464.1,BTA016737.1,BTA003619.1,BTA022916.1,BTA004620.1;support_id=CUFF20.433.2,BTA017507.1,BTA016708.1,BTA022528.1,BTA025540.3,BTA025695.1,BTA010834.1,BTA017518.1,BTA024826.3,BTA017093.1,BTA027426.1,BTA023521.1,BTA008635.1,BTA011591.1,BTA005950.1,BTA005418.1,BTA027338.1,BTA029261.1;support_id=CUFF119.484.3,BTA007279.1,BTA002761.1,BTA011438.1,BTA003933.1,BTA012508.1,BTA009557.1,BT…
GO:0030135	coated vesicle	cellular_component	0.35093	1	31	8211	51	14362	BTA025540.3,BTA022528.1,BTA004620.1;support_id=CUFF20.433.2,BTA017507.1,BTA016708.1,BTA022916.1,BTA029464.1,BTA002604.1,BTA016737.1,BTA003619.1,BTA029261.1;support_id=CUFF119.484.3,BTA007279.1,BTA027338.1,BTA027426.1,BTA023521.1,BTA008635.1,BTA011591.1,BTA005950.1,BTA005418.1,BTA017093.1,BTA010834.1,BTA025695.1,BTA017518.1,BTA024826.3,BTA030126.1,BTA000946.1,BTA003933.1,BTA012508.1,BTA009557.1,BT…
GO:0030659	cytoplasmic vesicle membrane	cellular_component	0.35093	1	31	8211	51	14362	BTA030126.1,BTA000946.1,BTA009557.1,BTA012508.1,BTA003933.1,BTA011438.1,BTA002761.1,BTA007279.1,BTA029261.1;support_id=CUFF119.484.3,BTA027338.1,BTA005950.1,BTA005418.1,BTA027426.1,BTA023521.1,BTA008635.1,BTA011591.1,BTA017093.1,BTA024826.3,BTA017518.1,BTA010834.1,BTA025695.1,BTA022528.1,BTA025540.3,BTA017507.1,BTA016708.1,BTA004620.1;support_id=CUFF20.433.2,BTA022916.1,BTA003619.1,BTA002604.1,BT…
GO:0030662	coated vesicle membrane	cellular_component	0.35093	1	31	8211	51	14362	BTA029261.1;support_id=CUFF119.484.3,BTA007279.1,BTA027338.1,BTA005950.1,BTA005418.1,BTA023521.1,BTA027426.1,BTA008635.1,BTA011591.1,BTA017093.1,BTA024826.3,BTA017518.1,BTA010834.1,BTA025695.1,BTA025540.3,BTA022528.1,BTA017507.1,BTA004620.1;support_id=CUFF20.433.2,BTA016708.1,BTA022916.1,BTA003619.1,BTA029464.1,BTA016737.1,BTA002604.1,BTA030126.1,BTA000946.1,BTA009557.1,BTA012508.1,BTA003933.1,BT…
GO:0006333	chromatin assembly or disassembly	biological_process	0.35134	1	14	8211	22	14362	BTA003971.1,BTA020083.1,BTA026707.1,BTA000844.1,BTA025480.1,BTA003814.2,BTA023383.1,BTA015620.1;support_id=CUFF66.335.2,BTA001244.1,BTA007889.1;support_id=CUFF33.575.3,BTA023627.1;support_id=CUFF97.322.1,BTA021199.1,BTA001350.1,BTA026719.2
GO:0030133	transport vesicle	cellular_component	0.35253	1	31	8211	51	14362	BTA010834.1,BTA025695.1,BTA017518.1,BTA024826.3,BTA001364.1,BTA007279.1,BTA027426.1,BTA008635.1,BTA023521.1,BTA011591.1,BTA005950.1,BTA005418.1,BTA022916.1,BTA016737.1,BTA029464.1,BTA003619.1,BTA025540.3,BTA022528.1,BTA000036.2,BTA017507.1,BTA004620.1;support_id=CUFF20.433.2,BTA016708.1,BTA012508.1,BTA003933.1,BTA009557.1,BTA002761.1,BTA011438.1,BTA030126.1,BTA000946.1,BTA014011.1,BTA027718.1
GO:0051052	regulation of DNA metabolic process	biological_process	0.35269	1	14	8211	22	14362	BTA020063.1,BTA022070.1,BTA015123.1;support_id=CUFF62.581.1,BTA017886.1,BTA002577.1,BTA027586.1,BTA019195.2,BTA010658.1,BTA015243.1,BTA024683.1,BTA009066.1,BTA014808.1;support_id=CUFF61.671.1,BTA002989.1,BTA021016.1
GO:0033014	tetrapyrrole biosynthetic process	biological_process	0.35273	1	74	8211	125	14362	BTA021906.3,BTA003577.1,BTA014798.1,BTA018438.1,BTA001000.1,BTA007292.1,BTA018685.1,BTA020890.1,BTA029306.1,BTA019657.1,BTA007218.1,BTA000425.1,BTA011434.1,BTA003085.1;support_id=CUFF13.76.1,BTA024706.1,BTA020082.1,BTA027042.1,BTA022288.1,BTA004391.1,BTA016313.1,BTA014311.1,BTA000549.1,BTA004572.1,BTA017774.1,BTA006745.1,BTA022324.1,BTA005651.1,BTA012257.4,BTA018355.1,BTA023640.2,BTA025620.1;supp…
GO:0005351	sugar:proton symporter activity	molecular_function	0.35313	1	5	8211	7	14362	BTA029097.1,BTA012343.1,BTA003887.1,BTA029581.1,BTA029083.1
GO:0005402	cation:sugar symporter activity	molecular_function	0.35313	1	5	8211	7	14362	BTA029581.1,BTA029083.1,BTA003887.1,BTA029097.1,BTA012343.1
GO:0015295	solute:proton symporter activity	molecular_function	0.35313	1	5	8211	7	14362	BTA012343.1,BTA029097.1,BTA003887.1,BTA029083.1,BTA029581.1
GO:0009267	cellular response to starvation	biological_process	0.35358	1	5	8211	7	14362	BTA026299.1,BTA019417.1,BTA029862.1,BTA005527.1,BTA009484.1
GO:0031667	response to nutrient levels	biological_process	0.35358	1	5	8211	7	14362	BTA009484.1,BTA026299.1,BTA019417.1,BTA029862.1,BTA005527.1
GO:0031669	cellular response to nutrient levels	biological_process	0.35358	1	5	8211	7	14362	BTA009484.1,BTA019417.1,BTA026299.1,BTA005527.1,BTA029862.1
GO:0042594	response to starvation	biological_process	0.35358	1	5	8211	7	14362	BTA009484.1,BTA026299.1,BTA019417.1,BTA029862.1,BTA005527.1
GO:0044702	single organism reproductive process	biological_process	0.35466	1	31	8211	51	14362	BTA029395.1,BTA021039.1;support_id=CUFF87.585.1,BTA008547.1,BTA014782.1;support_id=CUFF61.626.1,BTA005961.1,BTA026575.1,BTA002147.1;support_id=CUFF9.207.1,BTA023255.1,BTA016017.1,BTA001309.1,BTA011210.1,BTA014089.3,BTA028744.1;support_id=CUFF117.740.2,BTA012946.1;support_id=CUFF54.424.1,BTA023871.1,BTA014297.1,BTA026573.1,BTA003554.1,BTA020698.1,BTA003881.1,BTA011571.1,BTA014118.1,BTA012945.1,BTA…
GO:0004611	phosphoenolpyruvate carboxykinase activity	molecular_function	0.35503	1	5	8211	7	14362	BTA019499.1;support_id=CUFF81.33.1,BTA003667.1,BTA028750.1,BTA000542.1,BTA018115.1
GO:0004174	electron-transferring-flavoprotein dehydrogenase activity	molecular_function	0.35569	1	5	8211	7	14362	BTA024535.1,BTA017266.1,BTA013420.1,BTA021578.1,BTA007430.1
GO:0016649	oxidoreductase activity, acting on the CH-NH group of donors, quinone or similar compound as acceptor	molecular_function	0.35569	1	5	8211	7	14362	BTA017266.1,BTA024535.1,BTA013420.1,BTA021578.1,BTA007430.1
GO:0008202	steroid metabolic process	biological_process	0.35585	1	42	8211	70	14362	BTA003108.1,BTA000559.1,BTA020767.1,BTA026326.1,BTA007838.1,BTA000300.1,BTA022394.4;support_id=CUFF93.65.1,BTA007020.1,BTA015064.1,BTA003107.1,BTA018726.1,BTA022299.1,BTA006136.1,BTA022558.1,BTA005973.1,BTA028011.1,BTA021140.1,BTA010605.1,BTA005557.1,BTA026578.1,BTA017246.1,BTA018699.1,BTA009015.1,BTA023202.1,BTA024923.1,BTA017211.1,BTA026861.1,BTA006930.1,BTA026013.1,BTA018876.1,BTA003663.1,BTA0…
GO:0006541	glutamine metabolic process	biological_process	0.35658	1	14	8211	22	14362	BTA002356.3,BTA012852.1,BTA010323.1,BTA020275.1,BTA011865.1,BTA023130.1,BTA003345.1,BTA024498.1,BTA011748.1,BTA001407.1,BTA009819.1,BTA008028.1,BTA016313.1,BTA025851.1
GO:0009982	pseudouridine synthase activity	molecular_function	0.35684	1	14	8211	22	14362	BTA026860.2,BTA000230.1,BTA003814.2,BTA027191.1,BTA006445.1,BTA021673.1,BTA012793.1,BTA009818.1,BTA014293.1,BTA018663.1,BTA005534.1,BTA001895.1,BTA021199.1,BTA021526.1
GO:0070603	SWI/SNF superfamily-type complex	cellular_component	0.35687	1	5	8211	7	14362	BTA024623.1,BTA010178.1,BTA010595.2,BTA028691.1,BTA000870.1
GO:0070838	divalent metal ion transport	biological_process	0.35699	1	45	8211	75	14362	BTA024485.2,BTA030120.1,BTA029085.1,BTA022315.1,BTA011872.1,BTA019493.1;support_id=CUFF81.23.1,BTA023269.1;support_id=CUFF96.269.1,BTA029099.1,BTA009046.1,BTA018393.1,BTA017967.1,BTA017645.3,BTA025605.1,BTA027571.1,BTA016777.1,BTA001998.1,BTA004872.1,BTA019460.1,BTA009348.1,BTA011417.1,BTA023697.1,BTA028046.1,BTA014562.1,BTA022312.1,BTA012852.1,BTA002708.1,BTA027545.1,BTA029882.1,BTA024996.1,BTA0…
GO:0000778	condensed nuclear chromosome kinetochore	cellular_component	0.35793	1	28	8211	46	14362	BTA022394.4;support_id=CUFF93.65.1,BTA016967.1,BTA030022.1,BTA019773.1,BTA006057.1,BTA004022.1,BTA020008.2,BTA012181.1,BTA020191.1,BTA011523.1,BTA018069.1;support_id=CUFF76.115.1,BTA017587.1,BTA006074.1,BTA027841.1,BTA027329.2,BTA011278.1,BTA021829.2;support_id=CUFF90.627.1,BTA018546.1,BTA008129.2,BTA014443.1,BTA002147.1;support_id=CUFF9.207.1,BTA004032.1,BTA012267.1,BTA011244.1,BTA029464.1,BTA00…
GO:0000780	condensed nuclear chromosome, centromeric region	cellular_component	0.35793	1	28	8211	46	14362	BTA029464.1,BTA030028.1,BTA018727.1,BTA005534.1,BTA014443.1,BTA011244.1,BTA012267.1,BTA004032.1,BTA002147.1;support_id=CUFF9.207.1,BTA006074.1,BTA011523.1,BTA018069.1;support_id=CUFF76.115.1,BTA017587.1,BTA011278.1,BTA021829.2;support_id=CUFF90.627.1,BTA018546.1,BTA008129.2,BTA027841.1,BTA027329.2,BTA019773.1,BTA022394.4;support_id=CUFF93.65.1,BTA016967.1,BTA030022.1,BTA020191.1,BTA012181.1,BTA00…
GO:0000942	condensed nuclear chromosome outer kinetochore	cellular_component	0.35793	1	28	8211	46	14362	BTA012181.1,BTA020191.1,BTA006057.1,BTA004022.1,BTA020008.2,BTA019773.1,BTA022394.4;support_id=CUFF93.65.1,BTA016967.1,BTA030022.1,BTA018546.1,BTA021829.2;support_id=CUFF90.627.1,BTA011278.1,BTA008129.2,BTA027841.1,BTA027329.2,BTA006074.1,BTA011523.1,BTA018069.1;support_id=CUFF76.115.1,BTA017587.1,BTA012267.1,BTA011244.1,BTA004032.1,BTA002147.1;support_id=CUFF9.207.1,BTA014443.1,BTA030028.1,BTA00…
GO:0042729	DASH complex	cellular_component	0.35793	1	28	8211	46	14362	BTA029464.1,BTA018727.1,BTA005534.1,BTA030028.1,BTA014443.1,BTA002147.1;support_id=CUFF9.207.1,BTA004032.1,BTA012267.1,BTA011244.1,BTA017587.1,BTA018069.1;support_id=CUFF76.115.1,BTA011523.1,BTA006074.1,BTA027329.2,BTA027841.1,BTA008129.2,BTA021829.2;support_id=CUFF90.627.1,BTA018546.1,BTA011278.1,BTA030022.1,BTA022394.4;support_id=CUFF93.65.1,BTA016967.1,BTA019773.1,BTA020008.2,BTA004022.1,BTA00…
GO:0005343	organic acid:sodium symporter activity	molecular_function	0.35803	1	11	8211	17	14362	BTA023425.1,BTA002965.1,BTA029738.1,BTA023952.1,BTA006033.1,BTA006031.1,BTA025433.1,BTA011100.1,BTA029737.1,BTA029883.1,BTA023628.1
GO:0015296	anion:cation symporter activity	molecular_function	0.35803	1	11	8211	17	14362	BTA002965.1,BTA023425.1,BTA023952.1,BTA029738.1,BTA006033.1,BTA025433.1,BTA006031.1,BTA023628.1,BTA029883.1,BTA029737.1,BTA011100.1
GO:0098772	molecular function regulator	molecular_function	0.35812	1	218	8211	374	14362	BTA021082.1,BTA027623.3,BTA004295.1,BTA024337.1,BTA029043.1,BTA006015.1,BTA019934.1,BTA027398.1,BTA021388.1,BTA026712.1,BTA026972.1,BTA001699.2;support_id=CUFF6.254.1,BTA014884.1,BTA004676.1,BTA012828.2,BTA004719.1,BTA001711.1;support_id=CUFF6.273.1,BTA015555.1,BTA009866.1,BTA028719.1,BTA006158.1,BTA021539.1,BTA004687.1,BTA021398.1,BTA013731.1,BTA012396.1,BTA008377.1,BTA001435.1,BTA001736.1,BTA00…
GO:0022804	active transmembrane transporter activity	molecular_function	0.35832	1	107	8211	182	14362	BTA015065.1,BTA021021.1,BTA003893.1,BTA000311.1,BTA017051.1,BTA025433.1,BTA001304.1,BTA002872.1,BTA013806.2,BTA026695.3,BTA006771.1,BTA025656.1,BTA017719.1,BTA028835.1,BTA003394.1,BTA012343.1,BTA028080.1,BTA003933.1,BTA002965.1,BTA004581.1,BTA006033.1,BTA015701.1;support_id=CUFF66.607.1,BTA029996.1;support_id=CUFF123.242.1,BTA004069.1;support_id=CUFF18.495.3,BTA018534.1,BTA001489.1,BTA020058.1,BT…
GO:0004797	thymidine kinase activity	molecular_function	0.35853	1	5	8211	7	14362	BTA018497.1,BTA022363.1,BTA021666.1,BTA009783.2;support_id=CUFF42.60.1,BTA023925.1
GO:0019136	deoxynucleoside kinase activity	molecular_function	0.35853	1	5	8211	7	14362	BTA023925.1,BTA009783.2;support_id=CUFF42.60.1,BTA021666.1,BTA022363.1,BTA018497.1
GO:0019206	nucleoside kinase activity	molecular_function	0.35853	1	5	8211	7	14362	BTA021666.1,BTA009783.2;support_id=CUFF42.60.1,BTA022363.1,BTA018497.1,BTA023925.1
GO:0044743	intracellular protein transmembrane import	biological_process	0.35865	1	11	8211	17	14362	BTA006128.1,BTA020719.1;support_id=CUFF86.420.1,BTA024009.1,BTA010256.1,BTA006914.1,BTA001603.1,BTA008897.1,BTA018830.1,BTA009058.1,BTA021471.1;support_id=CUFF89.562.1,BTA018812.1
GO:0065002	intracellular protein transmembrane transport	biological_process	0.35865	1	11	8211	17	14362	BTA009058.1,BTA021471.1;support_id=CUFF89.562.1,BTA018812.1,BTA018830.1,BTA001603.1,BTA008897.1,BTA006914.1,BTA024009.1,BTA010256.1,BTA006128.1,BTA020719.1;support_id=CUFF86.420.1
GO:0048856	anatomical structure development	biological_process	0.35901	1	84	8211	142	14362	BTA019967.1,BTA012945.1,BTA016724.2,BTA020555.1,BTA012550.1,BTA007134.1,BTA025009.1,BTA020357.1,BTA017507.1;support_id=CUFF74.627.2,BTA015760.1,BTA021039.1;support_id=CUFF87.585.1,BTA000202.1,BTA012179.1,BTA016484.1,BTA014089.3,BTA015881.1,BTA015645.1,BTA012353.1;support_id=CUFF52.61.1,BTA003886.2,BTA011375.1,BTA003530.1,BTA020701.1;support_id=CUFF86.373.1,BTA019495.1,BTA019408.1,BTA009828.1,BTA0…
GO:0019080	viral gene expression	biological_process	0.35933	1	8	8211	12	14362	BTA017191.1,BTA018535.1,BTA024646.1;support_id=CUFF102.1.1,BTA020082.1,BTA018955.2,BTA019159.1,BTA007235.1,BTA027841.1
GO:0008239	dipeptidyl-peptidase activity	molecular_function	0.35966	1	5	8211	7	14362	BTA028361.1,BTA027841.1,BTA018340.1,BTA022223.1,BTA027771.1
GO:0019083	viral transcription	biological_process	0.36003	1	5	8211	7	14362	BTA018955.2,BTA020082.1,BTA019159.1,BTA024646.1;support_id=CUFF102.1.1,BTA017191.1
GO:0019239	deaminase activity	molecular_function	0.36031	1	8	8211	12	14362	BTA011168.1,BTA012728.1,BTA009476.1,BTA021728.1,BTA026584.1,BTA015243.1,BTA028918.1,BTA007645.1
GO:0000394	RNA splicing, via endonucleolytic cleavage and ligation	biological_process	0.36032	1	5	8211	7	14362	BTA021471.1;support_id=CUFF89.562.1,BTA006067.1;support_id=CUFF26.309.1,BTA018316.1,BTA021586.1,BTA008914.1
GO:0006388	tRNA splicing, via endonucleolytic cleavage and ligation	biological_process	0.36032	1	5	8211	7	14362	BTA006067.1;support_id=CUFF26.309.1,BTA021471.1;support_id=CUFF89.562.1,BTA008914.1,BTA021586.1,BTA018316.1
GO:0016558	protein import into peroxisome matrix	biological_process	0.36072	1	5	8211	7	14362	BTA006128.1,BTA008897.1,BTA001603.1,BTA021471.1;support_id=CUFF89.562.1,BTA010256.1
GO:0016560	protein import into peroxisome matrix, docking	biological_process	0.36072	1	5	8211	7	14362	BTA021471.1;support_id=CUFF89.562.1,BTA010256.1,BTA006128.1,BTA001603.1,BTA008897.1
GO:0022615	protein to membrane docking	biological_process	0.36072	1	5	8211	7	14362	BTA010256.1,BTA021471.1;support_id=CUFF89.562.1,BTA001603.1,BTA008897.1,BTA006128.1
GO:0004814	arginine-tRNA ligase activity	molecular_function	0.36088	1	5	8211	7	14362	BTA006440.1,BTA004877.1,BTA012659.1,BTA020431.1,BTA019431.1
GO:0006420	arginyl-tRNA aminoacylation	biological_process	0.36088	1	5	8211	7	14362	BTA012659.1,BTA004877.1,BTA020431.1,BTA019431.1,BTA006440.1
GO:0044093	positive regulation of molecular function	biological_process	0.36091	1	15	8211	24	14362	BTA000395.1,BTA026575.1,BTA000461.1,BTA017901.1,BTA010751.1,BTA004295.1,BTA027630.1,BTA013731.1,BTA000370.1,BTA010971.1,BTA015397.1,BTA019417.1,BTA011187.2,BTA020360.1,BTA008360.1
GO:0009888	tissue development	biological_process	0.36105	1	18	8211	29	14362	BTA008534.1,BTA016724.2,BTA013650.1,BTA012550.1,BTA003189.1,BTA011360.1,BTA009721.1,BTA019408.1,BTA020698.1,BTA009059.1,BTA014297.1,BTA016484.1,BTA004745.1,BTA026573.1,BTA015760.1,BTA021039.1;support_id=CUFF87.585.1,BTA016017.1,BTA011210.1
GO:0003989	acetyl-CoA carboxylase activity	molecular_function	0.36113	1	5	8211	7	14362	BTA023017.1,BTA006415.1,BTA018313.1,BTA017244.1,BTA006414.1
GO:0016421	CoA carboxylase activity	molecular_function	0.36113	1	5	8211	7	14362	BTA018313.1,BTA006415.1,BTA006414.1,BTA017244.1,BTA023017.1
GO:0016885	ligase activity, forming carbon-carbon bonds	molecular_function	0.36113	1	5	8211	7	14362	BTA023017.1,BTA018313.1,BTA006415.1,BTA017244.1,BTA006414.1
GO:0009309	amine biosynthetic process	biological_process	0.36151	1	5	8211	7	14362	BTA024111.1,BTA009091.1,BTA027927.1,BTA023822.1,BTA013172.2;support_id=CUFF55.203.2
GO:0042401	cellular biogenic amine biosynthetic process	biological_process	0.36151	1	5	8211	7	14362	BTA027927.1,BTA023822.1,BTA013172.2;support_id=CUFF55.203.2,BTA024111.1,BTA009091.1
GO:0030286	dynein complex	cellular_component	0.36217	1	11	8211	17	14362	BTA020575.1,BTA019459.1,BTA017886.1,BTA020569.1,BTA022433.1,BTA019199.1,BTA006365.1,BTA000813.1,BTA015243.1,BTA024401.1,BTA021376.1
GO:0034702	ion channel complex	cellular_component	0.36227	1	8	8211	12	14362	BTA008896.1;support_id=CUFF37.723.2,BTA001407.1,BTA029122.3,BTA015269.1,BTA000415.1,BTA006772.1,BTA002708.1,BTA012852.1
GO:0034703	cation channel complex	cellular_component	0.36227	1	8	8211	12	14362	BTA006772.1,BTA000415.1,BTA015269.1,BTA012852.1,BTA002708.1,BTA008896.1;support_id=CUFF37.723.2,BTA029122.3,BTA001407.1
GO:0051494	negative regulation of cytoskeleton organization	biological_process	0.36236	1	8	8211	12	14362	BTA012679.1,BTA021474.1,BTA027151.1,BTA025651.1,BTA011796.1,BTA029084.1,BTA029737.1,BTA029098.1
GO:0003847	1-alkyl-2-acetylglycerophosphocholine esterase activity	molecular_function	0.36263	1	5	8211	7	14362	BTA001993.1,BTA011559.1,BTA023646.1,BTA010195.2,BTA001319.1
GO:0005158	insulin receptor binding	molecular_function	0.36264	1	8	8211	12	14362	BTA009486.1;support_id=CUFF41.32.1,BTA018756.1,BTA009994.1,BTA011568.1,BTA004203.1,BTA000443.2,BTA001185.1,BTA008126.1
GO:0008915	lipid-A-disaccharide synthase activity	molecular_function	0.36268	1	5	8211	7	14362	BTA002416.3,BTA008540.1,BTA026055.1,BTA011169.1,BTA002977.1
GO:0009403	toxin biosynthetic process	biological_process	0.36332	1	5	8211	7	14362	BTA029409.1,BTA021176.1,BTA001075.1,BTA011509.1,BTA030085.1;support_id=CUFF124.220.1
GO:0018342	protein prenylation	biological_process	0.36364	1	8	8211	12	14362	BTA000771.1,BTA019840.1,BTA007639.1,BTA010463.1,BTA006783.2,BTA028246.1,BTA026931.1,BTA012191.1
GO:0097354	prenylation	biological_process	0.36364	1	8	8211	12	14362	BTA010463.1,BTA006783.2,BTA028246.1,BTA026931.1,BTA012191.1,BTA000771.1,BTA019840.1,BTA007639.1
GO:0022414	reproductive process	biological_process	0.36369	1	42	8211	70	14362	BTA027244.1,BTA015878.1;support_id=CUFF68.52.1,BTA026114.1;support_id=CUFF107.558.1,BTA022164.1,BTA011427.1,BTA003682.5,BTA003881.1,BTA018177.1,BTA011571.1,BTA014118.1,BTA012945.1,BTA004221.1,BTA025375.1,BTA014089.3,BTA002785.1,BTA023871.1,BTA014297.1,BTA026573.1,BTA005885.1,BTA003554.1,BTA021039.1;support_id=CUFF87.585.1,BTA008547.1,BTA026575.1,BTA005961.1,BTA017116.1;support_id=CUFF73.378.1,BTA…
GO:0030153	bacteriocin immunity	biological_process	0.36418	1	5	8211	7	14362	BTA017135.1,BTA020549.1,BTA029073.1,BTA007633.1,BTA018361.1
GO:0097164	ammonium ion metabolic process	biological_process	0.36439	1	5	8211	7	14362	BTA024111.1,BTA007837.2,BTA027927.1,BTA023822.1,BTA025989.1
GO:0098609	cell-cell adhesion	biological_process	0.36452	1	25	8211	41	14362	BTA008367.1,BTA008692.1,BTA013569.1,BTA026534.1,BTA017858.1,BTA024259.1,BTA015386.1,BTA008468.1,BTA028973.1,BTA016001.1,BTA011260.1,BTA013572.1,BTA011260.1;support_id=CUFF47.547.2,BTA013577.1,BTA011893.1,BTA019845.1,BTA014530.1,BTA008366.1,BTA013283.1,BTA011894.1,BTA009208.1,BTA011211.1,BTA009133.1,BTA013836.1,BTA002869.1
GO:0009142	nucleoside triphosphate biosynthetic process	biological_process	0.36462	1	39	8211	65	14362	BTA003842.1;support_id=CUFF17.464.1,BTA028178.1,BTA006464.1,BTA010679.1,BTA018445.1,BTA005669.2,BTA008838.1,BTA027970.1,BTA014855.1,BTA005254.1,BTA025566.1,BTA004526.1,BTA009445.1,BTA018494.1,BTA026401.1,BTA002304.1,BTA006772.1,BTA019460.1,BTA011581.1,BTA030198.1,BTA016180.1,BTA007848.1,BTA016664.1,BTA002736.1,BTA009531.1,BTA019450.1,BTA018678.1,BTA011358.1;support_id=CUFF48.12.4,BTA007709.1,BTA0…
GO:0009145	purine nucleoside triphosphate biosynthetic process	biological_process	0.36462	1	39	8211	65	14362	BTA005669.2,BTA027970.1,BTA008838.1,BTA010679.1,BTA006464.1,BTA018445.1,BTA003842.1;support_id=CUFF17.464.1,BTA028178.1,BTA006772.1,BTA019460.1,BTA007848.1,BTA016664.1,BTA011581.1,BTA030198.1,BTA016180.1,BTA009445.1,BTA004526.1,BTA014855.1,BTA025566.1,BTA005254.1,BTA026401.1,BTA002304.1,BTA018494.1,BTA009264.1,BTA007709.1,BTA020155.1,BTA004581.1,BTA019450.1,BTA002736.1,BTA009531.1,BTA011358.1;sup…
GO:0009201	ribonucleoside triphosphate biosynthetic process	biological_process	0.36462	1	39	8211	65	14362	BTA018494.1,BTA026401.1,BTA002304.1,BTA014855.1,BTA025566.1,BTA005254.1,BTA009445.1,BTA004526.1,BTA011581.1,BTA030198.1,BTA016180.1,BTA016664.1,BTA007848.1,BTA006772.1,BTA019460.1,BTA003842.1;support_id=CUFF17.464.1,BTA028178.1,BTA010679.1,BTA006464.1,BTA018445.1,BTA008838.1,BTA027970.1,BTA005669.2,BTA002013.1,BTA020035.1,BTA004882.1,BTA013064.1,BTA012427.1,BTA024634.1,BTA021534.2;support_id=CUFF…
GO:0009206	purine ribonucleoside triphosphate biosynthetic process	biological_process	0.36462	1	39	8211	65	14362	BTA004882.1,BTA013064.1,BTA002013.1,BTA020035.1,BTA024634.1,BTA021534.2;support_id=CUFF89.776.2,BTA012427.1,BTA009531.1,BTA002736.1,BTA019450.1,BTA018678.1,BTA011358.1;support_id=CUFF48.12.4,BTA007709.1,BTA009264.1,BTA004581.1,BTA020155.1,BTA005254.1,BTA025566.1,BTA014855.1,BTA009445.1,BTA004526.1,BTA018494.1,BTA002304.1,BTA026401.1,BTA019460.1,BTA006772.1,BTA016180.1,BTA030198.1,BTA011581.1,BTA0…
GO:0005856	cytoskeleton	cellular_component	0.36468	1	132	8211	225	14362	BTA010190.1,BTA022538.1,BTA021341.1,BTA019868.1,BTA024785.1;support_id=CUFF102.306.1,BTA022432.2,BTA004022.1,BTA008788.2,BTA019199.1,BTA009746.2,BTA006365.1,BTA002147.1;support_id=CUFF9.207.1,BTA010292.1,BTA027034.1,BTA021829.2;support_id=CUFF90.627.1,BTA003196.1,BTA020700.1,BTA008944.3;support_id=CUFF38.96.1,BTA002340.1,BTA013767.1,BTA006057.1,BTA030022.1,BTA024401.1,BTA012506.1,BTA002262.1,BTA0…
GO:0006839	mitochondrial transport	biological_process	0.36499	1	8	8211	12	14362	BTA018830.1,BTA009058.1,BTA018812.1,BTA011186.2,BTA000460.1,BTA003068.1;support_id=CUFF13.29.1,BTA024009.1,BTA006914.1
GO:0009878	nodule morphogenesis	biological_process	0.36553	1	8	8211	12	14362	BTA020405.1,BTA017507.1;support_id=CUFF74.627.2,BTA021548.3,BTA002839.1,BTA020999.2,BTA029209.1,BTA009307.1;support_id=CUFF39.693.1,BTA006428.1;support_id=CUFF27.358.1
GO:0009886	post-embryonic morphogenesis	biological_process	0.36553	1	8	8211	12	14362	BTA006428.1;support_id=CUFF27.358.1,BTA009307.1;support_id=CUFF39.693.1,BTA029209.1,BTA002839.1,BTA021548.3,BTA020999.2,BTA020405.1,BTA017507.1;support_id=CUFF74.627.2
GO:0044111	development involved in symbiotic interaction	biological_process	0.36553	1	8	8211	12	14362	BTA020999.2,BTA021548.3,BTA002839.1,BTA020405.1,BTA017507.1;support_id=CUFF74.627.2,BTA006428.1;support_id=CUFF27.358.1,BTA009307.1;support_id=CUFF39.693.1,BTA029209.1
GO:0009452	7-methylguanosine RNA capping	biological_process	0.3657	1	18	8211	29	14362	BTA022998.1,BTA012794.1,BTA011383.1,BTA002035.1,BTA006400.1,BTA028771.1,BTA006401.1,BTA011479.1,BTA022507.1,BTA005585.1,BTA027813.1,BTA024710.1,BTA021950.1;support_id=CUFF92.56.1,BTA021525.1,BTA022999.1,BTA003671.1,BTA007334.1,BTA016430.1
GO:0036260	RNA capping	biological_process	0.3657	1	18	8211	29	14362	BTA006400.1,BTA011383.1,BTA012794.1,BTA022998.1,BTA002035.1,BTA006401.1,BTA011479.1,BTA028771.1,BTA024710.1,BTA022999.1,BTA021950.1;support_id=CUFF92.56.1,BTA021525.1,BTA027813.1,BTA005585.1,BTA022507.1,BTA016430.1,BTA007334.1,BTA003671.1
GO:0004181	metallocarboxypeptidase activity	molecular_function	0.36604	1	8	8211	12	14362	BTA020073.1,BTA020072.1,BTA028895.1,BTA007358.2,BTA003308.1,BTA013026.1,BTA003097.1,BTA004757.1
GO:0046149	pigment catabolic process	biological_process	0.36633	1	8	8211	12	14362	BTA010956.1,BTA001319.1,BTA008540.1,BTA026055.1,BTA007388.2,BTA023144.1,BTA001993.1,BTA000687.1
GO:0045786	negative regulation of cell cycle	biological_process	0.36687	1	15	8211	24	14362	BTA008132.1,BTA021856.1,BTA016532.1,BTA006966.1,BTA001705.2,BTA027828.1,BTA025651.1,BTA001369.1,BTA015556.1,BTA029361.1,BTA015555.1,BTA025250.1,BTA027912.1,BTA003167.1,BTA007461.1
GO:0004096	catalase activity	molecular_function	0.36769	1	5	8211	7	14362	BTA029701.1,BTA018445.1,BTA015769.2,BTA018293.1,BTA003768.1
GO:0051184	cofactor transporter activity	molecular_function	0.36814	1	5	8211	7	14362	BTA014310.1;support_id=CUFF60.6.1,BTA000202.1;support_id=CUFF2.64.1,BTA015080.1,BTA022640.1;support_id=CUFF94.12.1,BTA002059.1
GO:1901135	carbohydrate derivative metabolic process	biological_process	0.36821	1	292	8211	503	14362	BTA008141.1,BTA029705.1,BTA001461.2,BTA007709.1,BTA009224.1,BTA003349.1,BTA013064.1,BTA012427.1,BTA012322.1,BTA024733.1,BTA024634.1,BTA021534.2;support_id=CUFF89.776.2,BTA011186.2,BTA029065.1,BTA018716.1,BTA026439.1,BTA006464.1,BTA002499.1,BTA011916.2,BTA022361.1,BTA001486.1,BTA002977.1,BTA002304.1,BTA030090.1,BTA009445.1,BTA028693.3,BTA015110.1,BTA023664.1,BTA015301.1,BTA012257.4,BTA001287.2,BTA…
GO:0012506	vesicle membrane	cellular_component	0.36932	1	32	8211	53	14362	BTA025540.3,BTA022528.1,BTA004620.1;support_id=CUFF20.433.2,BTA017507.1,BTA016708.1,BTA002604.1,BTA029464.1,BTA007279.1,BTA002679.1,BTA023521.1,BTA011591.1,BTA008635.1,BTA005950.1,BTA005418.1,BTA017093.1,BTA025695.1,BTA010834.1,BTA030126.1,BTA000946.1,BTA012508.1,BTA003933.1,BTA009557.1,BTA022916.1,BTA016737.1,BTA003619.1,BTA027338.1,BTA029261.1;support_id=CUFF119.484.3,BTA027426.1,BTA017518.1,BT…
GO:0031929	TOR signaling	biological_process	0.36935	1	8	8211	12	14362	BTA002944.1,BTA023731.1,BTA011625.1,BTA028975.1,BTA018619.1,BTA005964.1,BTA026859.1,BTA002147.1;support_id=CUFF9.207.1
GO:0032006	regulation of TOR signaling	biological_process	0.36935	1	8	8211	12	14362	BTA002944.1,BTA023731.1,BTA011625.1,BTA018619.1,BTA005964.1,BTA026859.1,BTA028975.1,BTA002147.1;support_id=CUFF9.207.1
GO:0071705	nitrogen compound transport	biological_process	0.37563	1	64	8211	108	14362	BTA003629.1,BTA002006.1,BTA014310.1;support_id=CUFF60.6.1,BTA028838.1,BTA020230.1,BTA013833.1,BTA022213.1,BTA002059.1,BTA003269.4,BTA004160.1;support_id=CUFF19.80.1,BTA003893.1,BTA021661.1,BTA018666.1,BTA021422.2,BTA021509.1,BTA026406.1,BTA029375.1,BTA025557.1,BTA023639.1,BTA019245.1,BTA004765.1,BTA027389.1,BTA004007.1,BTA018661.1,BTA012079.1,BTA009208.1,BTA026193.1,BTA006289.1,BTA015410.1,BTA020…
GO:0071944	cell periphery	cellular_component	0.37626	1	171	8211	293	14362	BTA025655.1,BTA002491.1,BTA002008.1;support_id=CUFF8.429.1,BTA002314.1,BTA025925.1,BTA011737.1,BTA010885.1,BTA015631.1,BTA020719.1;support_id=CUFF86.420.1,BTA010276.1;support_id=CUFF43.403.2,BTA015878.1;support_id=CUFF68.52.1,BTA013247.5,BTA015105.1,BTA013767.1,BTA009942.1;support_id=CUFF42.456.1,BTA018099.1,BTA010190.1,BTA019947.1,BTA015323.1;support_id=CUFF65.89.2,BTA020773.1,BTA024922.1,BTA004…
GO:0009072	aromatic amino acid family metabolic process	biological_process	0.37765	1	15	8211	24	14362	BTA018285.1,BTA017018.1,BTA010671.1,BTA011654.1,BTA018333.1,BTA000221.1,BTA005546.1,BTA020786.1,BTA007577.1;support_id=CUFF32.152.1,BTA006067.1;support_id=CUFF26.309.1,BTA017094.1,BTA030184.1,BTA001940.1,BTA011954.1,BTA020199.1;support_id=CUFF84.171.1
GO:0009100	glycoprotein metabolic process	biological_process	0.37837	1	39	8211	65	14362	BTA030090.1,BTA028994.1,BTA027663.1,BTA004490.1;support_id=CUFF20.170.2,BTA020620.1,BTA019574.1,BTA014870.1,BTA001745.1,BTA005138.1,BTA007732.2,BTA021860.1,BTA000986.1,BTA011916.2,BTA010523.1,BTA004525.1,BTA011083.1,BTA002430.1,BTA001066.1,BTA011631.2,BTA003387.2,BTA019628.2,BTA027382.1,BTA026005.1,BTA012192.1,BTA024463.1,BTA023811.1,BTA012603.1,BTA021028.2,BTA006420.1,BTA024038.1,BTA023661.1,BTA…
GO:0009064	glutamine family amino acid metabolic process	biological_process	0.37941	1	25	8211	41	14362	BTA006928.1,BTA016313.1,BTA001758.2,BTA016592.1,BTA008028.1,BTA009819.1,BTA001407.1,BTA010256.1,BTA024498.1,BTA003345.1,BTA011865.1,BTA008897.1,BTA029066.1,BTA023533.1,BTA010323.1,BTA020275.1,BTA022006.1,BTA002356.3,BTA025851.1,BTA027797.1,BTA011748.1,BTA023130.1,BTA012852.1,BTA011719.1,BTA009783.2;support_id=CUFF42.60.1
GO:0072657	protein localization to membrane	biological_process	0.37971	1	50	8211	84	14362	BTA009375.1,BTA009310.1,BTA001154.1,BTA018414.1,BTA024292.2,BTA003232.1,BTA011067.1,BTA010320.1,BTA004651.1,BTA009104.1,BTA002103.1,BTA018316.1,BTA022409.1,BTA006565.1,BTA023828.1,BTA021970.1,BTA020719.1;support_id=CUFF86.420.1,BTA024732.1,BTA003678.2,BTA021666.1,BTA009528.1,BTA014100.2,BTA001377.1,BTA026238.1,BTA026136.1,BTA023925.1,BTA017043.1,BTA024334.1,BTA000359.1,BTA011576.2;support_id=CUFF…
GO:0005887	integral component of plasma membrane	cellular_component	0.3798	1	36	8211	60	14362	BTA002543.1,BTA021981.1,BTA005814.1,BTA013655.1,BTA010169.1;support_id=CUFF43.115.1,BTA026999.1,BTA006651.1,BTA007225.2;support_id=CUFF30.588.2,BTA002491.1,BTA020190.1;support_id=CUFF84.148.2,BTA002008.1;support_id=CUFF8.429.1,BTA023769.1;support_id=CUFF97.636.1,BTA000415.1,BTA011292.1,BTA002195.1,BTA015878.1;support_id=CUFF68.52.1,BTA006281.1;support_id=CUFF27.40.1,BTA015041.1,BTA024329.1;suppor…
GO:0031226	intrinsic component of plasma membrane	cellular_component	0.3798	1	36	8211	60	14362	BTA008539.1,BTA019206.1,BTA015269.1,BTA003628.1,BTA001331.1;support_id=CUFF5.63.2,BTA013367.1,BTA007853.1,BTA012630.1;support_id=CUFF53.430.1,BTA026054.1,BTA011638.1,BTA006056.1;support_id=CUFF26.288.2,BTA019947.1,BTA020773.1,BTA000990.1;support_id=CUFF3.874.1,BTA023997.1;support_id=CUFF98.537.1,BTA024922.1,BTA023769.1;support_id=CUFF97.636.1,BTA000415.1,BTA010276.1;support_id=CUFF43.403.2,BTA024…
GO:0005743	mitochondrial inner membrane	cellular_component	0.37995	1	61	8211	103	14362	BTA013656.1,BTA018319.1,BTA009264.1,BTA018185.1,BTA020155.1,BTA026055.1,BTA013681.1;support_id=CUFF57.246.2,BTA028838.1,BTA008033.1,BTA009531.1,BTA019450.1,BTA008540.1,BTA023808.1,BTA011358.1;support_id=CUFF48.12.4,BTA021534.2;support_id=CUFF89.776.2,BTA011186.2,BTA000460.1,BTA026063.1,BTA018055.1,BTA009447.1,BTA001336.1,BTA006396.1,BTA004882.1,BTA013064.1,BTA006914.1,BTA014049.1,BTA007295.1,BTA0…
GO:0016023	cytoplasmic membrane-bounded vesicle	cellular_component	0.381	1	40	8211	67	14362	BTA027426.1,BTA029261.1;support_id=CUFF119.484.3,BTA027338.1,BTA017518.1,BTA024826.3,BTA006397.1,BTA016737.1,BTA012946.1;support_id=CUFF54.424.1,BTA003619.1,BTA022916.1,BTA014011.1,BTA002761.1,BTA011438.1,BTA027718.1,BTA011591.1,BTA023521.1,BTA008635.1,BTA005418.1,BTA005950.1,BTA007279.1,BTA010834.1,BTA025695.1,BTA001364.1,BTA017093.1,BTA016708.1,BTA017507.1,BTA004620.1;support_id=CUFF20.433.2,BT…
GO:0006119	oxidative phosphorylation	biological_process	0.38246	1	12	8211	19	14362	BTA013656.1,BTA018319.1,BTA009447.1,BTA017267.1,BTA026055.1,BTA008540.1,BTA013611.1,BTA011193.1,BTA000827.1,BTA001571.2,BTA023625.3,BTA017353.1
GO:0042773	ATP synthesis coupled electron transport	biological_process	0.38246	1	12	8211	19	14362	BTA013656.1,BTA018319.1,BTA026055.1,BTA017267.1,BTA009447.1,BTA000827.1,BTA011193.1,BTA013611.1,BTA008540.1,BTA017353.1,BTA001571.2,BTA023625.3
GO:0005777	peroxisome	cellular_component	0.38374	1	22	8211	36	14362	BTA023269.1,BTA006128.1,BTA000475.1,BTA003255.1,BTA016306.1,BTA010256.1,BTA006020.1,BTA008897.1,BTA005266.1,BTA021471.1;support_id=CUFF89.562.1,BTA020719.1;support_id=CUFF86.420.1,BTA000363.1,BTA014274.1,BTA005803.2,BTA001461.2,BTA027473.2,BTA001941.1,BTA029812.2,BTA001603.1,BTA022500.1,BTA002926.1,BTA024104.1
GO:0042579	microbody	cellular_component	0.38374	1	22	8211	36	14362	BTA008897.1,BTA005266.1,BTA006020.1,BTA021471.1;support_id=CUFF89.562.1,BTA000475.1,BTA003255.1,BTA023269.1,BTA006128.1,BTA010256.1,BTA016306.1,BTA029812.2,BTA022500.1,BTA001603.1,BTA001941.1,BTA027473.2,BTA001461.2,BTA024104.1,BTA002926.1,BTA020719.1;support_id=CUFF86.420.1,BTA000363.1,BTA005803.2,BTA014274.1
GO:0031329	regulation of cellular catabolic process	biological_process	0.38509	1	29	8211	48	14362	BTA014770.3,BTA006565.1,BTA022920.1,BTA011443.1,BTA026451.1,BTA006256.1,BTA023810.1,BTA028129.1,BTA025453.1,BTA008318.1,BTA005515.1,BTA015600.1,BTA012316.2,BTA020899.2,BTA026838.1,BTA016168.1,BTA026146.1,BTA007911.1,BTA019147.1,BTA025655.1,BTA010190.1,BTA029361.1,BTA026237.1,BTA027828.1,BTA001326.1,BTA006125.1,BTA025916.2,BTA003076.1,BTA022487.1
GO:0055086	nucleobase-containing small molecule metabolic process	biological_process	0.3851	1	189	8211	325	14362	BTA018111.1,BTA010938.1,BTA008367.1,BTA013225.1,BTA004581.1,BTA026055.1,BTA019450.1,BTA008540.1,BTA009704.1,BTA001112.1;support_id=CUFF4.282.2,BTA030038.1,BTA004841.1,BTA013293.1,BTA008323.1,BTA011358.1;support_id=CUFF48.12.4,BTA002399.1,BTA018900.1,BTA014819.1,BTA005504.1,BTA022589.4,BTA007575.2,BTA018400.1,BTA010951.1,BTA013295.1,BTA013734.1,BTA020955.1,BTA023625.3,BTA025372.1,BTA023379.1,BTA02…
GO:0016651	oxidoreductase activity, acting on NAD(P)H	molecular_function	0.38632	1	51	8211	86	14362	BTA009447.1,BTA028542.1,BTA026063.1,BTA027146.1;support_id=CUFF111.646.1,BTA017746.1,BTA026910.1,BTA014695.1,BTA018296.1,BTA018506.1,BTA010751.1,BTA023625.3,BTA009562.1,BTA029109.1,BTA017136.1,BTA006898.1,BTA004620.1;support_id=CUFF20.433.2,BTA000510.1,BTA029107.1,BTA016967.1,BTA025978.1;support_id=CUFF107.254.1,BTA028177.1,BTA013672.1,BTA018185.1,BTA010461.1,BTA029690.1,BTA017353.1,BTA026928.1,B…
GO:0019941	modification-dependent protein catabolic process	biological_process	0.38857	1	44	8211	74	14362	BTA020149.1,BTA010351.1,BTA027828.1,BTA020534.1,BTA013289.1,BTA027569.1,BTA022487.1,BTA024041.1,BTA004314.2,BTA029455.2,BTA029871.1,BTA000265.1,BTA017573.1,BTA002232.3,BTA025877.1,BTA005813.1,BTA011364.1,BTA013400.1,BTA020866.1,BTA026146.1,BTA016024.1,BTA023259.1,BTA013297.1,BTA027547.1,BTA003864.1,BTA012316.2,BTA003863.1,BTA012059.1,BTA014244.1,BTA024952.1,BTA029361.1,BTA020758.1,BTA024032.1,BTA…
GO:0043632	modification-dependent macromolecule catabolic process	biological_process	0.38857	1	44	8211	74	14362	BTA029361.1,BTA024952.1,BTA014244.1,BTA012059.1,BTA003863.1,BTA012316.2,BTA027547.1,BTA003864.1,BTA013297.1,BTA016024.1,BTA023259.1,BTA026146.1,BTA008319.1,BTA007192.1,BTA010606.2,BTA028895.1,BTA029559.1,BTA023810.1,BTA010198.1,BTA028967.3,BTA008158.1,BTA006611.1,BTA009567.2;support_id=CUFF41.222.1,BTA020758.1,BTA024032.1,BTA024041.1,BTA004314.2,BTA022487.1,BTA027569.1,BTA020534.1,BTA013289.1,BTA…
GO:0003968	RNA-directed RNA polymerase activity	molecular_function	0.38889	1	40	8211	67	14362	BTA021039.1;support_id=CUFF87.585.1,BTA022998.1,BTA011527.1,BTA027818.1,BTA019154.1,BTA009472.1,BTA007334.1,BTA015349.1,BTA028254.1,BTA025611.2,BTA014847.1,BTA020082.1,BTA023769.1,BTA028805.1,BTA029302.1,BTA009484.1,BTA010495.1,BTA006429.1,BTA028187.1,BTA024170.1,BTA017191.1,BTA010463.1,BTA026222.1,BTA000742.2,BTA013680.1;support_id=CUFF57.243.3,BTA002035.1,BTA018130.1;support_id=CUFF76.210.4,BTA…
GO:0032504	multicellular organism reproduction	biological_process	0.38931	1	26	8211	43	14362	BTA011571.1,BTA014118.1,BTA012945.1,BTA003784.1;support_id=CUFF17.316.1,BTA025375.1,BTA020698.1,BTA003881.1,BTA029918.1,BTA013650.1,BTA008534.1,BTA026114.1;support_id=CUFF107.558.1,BTA023255.1,BTA002147.1;support_id=CUFF9.207.1,BTA016017.1,BTA001309.1,BTA011210.1,BTA021039.1;support_id=CUFF87.585.1,BTA029395.1,BTA014782.1;support_id=CUFF61.626.1,BTA005961.1,BTA017116.1;support_id=CUFF73.378.1,BTA…
GO:0016311	dephosphorylation	biological_process	0.39257	1	29	8211	48	14362	BTA025600.1,BTA026254.1,BTA025313.1,BTA022297.1,BTA002144.1,BTA023117.2;support_id=CUFF95.476.1,BTA017803.1,BTA011171.1,BTA002487.1,BTA020976.1,BTA026259.1,BTA026589.1,BTA023873.1,BTA019553.1,BTA008112.1,BTA022473.2,BTA016012.1,BTA010836.1,BTA028898.1,BTA001984.1,BTA025771.1,BTA020961.1,BTA023874.1,BTA022922.1,BTA017520.1,BTA011776.1,BTA026302.1,BTA004728.1,BTA009463.1
GO:0010038	response to metal ion	biological_process	0.3928	1	9	8211	14	14362	BTA024915.1,BTA006879.1,BTA016012.1,BTA003390.1,BTA000306.1,BTA015108.1,BTA027802.1,BTA003409.1,BTA010283.1
GO:0051234	establishment of localization	biological_process	0.39352	1	1325	8211	2303	14362	BTA026977.1;support_id=CUFF111.226.1,BTA024801.1;support_id=CUFF102.342.2,BTA001392.1,BTA013521.1,BTA021820.1,BTA002064.1,BTA001361.1,BTA001998.1,BTA011581.1,BTA022653.1,BTA004729.1,BTA011448.1,BTA026509.1,BTA017967.1,BTA011969.1,BTA027120.1,BTA017180.1,BTA002394.1,BTA024290.1,BTA023054.1,BTA004233.1,BTA001616.1,BTA020875.1,BTA009940.1,BTA010289.1,BTA022309.1,BTA029131.1,BTA028186.3,BTA003893.1,B…
GO:0006631	fatty acid metabolic process	biological_process	0.39354	1	62	8211	105	14362	BTA006720.1,BTA027753.1,BTA023461.1,BTA015709.1,BTA023937.1,BTA027975.1,BTA003108.1,BTA025987.1,BTA000363.1,BTA018339.1,BTA003107.1,BTA013281.1,BTA002519.1,BTA020712.1,BTA018795.1,BTA018355.1,BTA022299.1,BTA018681.1,BTA018354.1,BTA012257.4,BTA000515.1,BTA000560.1,BTA027848.1,BTA010956.1,BTA027785.1,BTA006415.1,BTA029456.1,BTA006928.1,BTA023269.1,BTA005490.1,BTA001337.1,BTA006755.1,BTA014370.1,BTA…
GO:0008192	RNA guanylyltransferase activity	molecular_function	0.39366	1	9	8211	14	14362	BTA021525.1,BTA027813.1,BTA013266.1,BTA015662.1;support_id=CUFF66.477.1,BTA005585.1,BTA012794.1,BTA011479.1,BTA019483.1,BTA003671.1
GO:0070568	guanylyltransferase activity	molecular_function	0.39366	1	9	8211	14	14362	BTA011479.1,BTA019483.1,BTA003671.1,BTA021525.1,BTA027813.1,BTA013266.1,BTA015662.1;support_id=CUFF66.477.1,BTA005585.1,BTA012794.1
GO:0034470	ncRNA processing	biological_process	0.39465	1	198	8211	341	14362	BTA026695.3,BTA006277.2,BTA018820.1,BTA024902.1,BTA018676.1,BTA011383.1,BTA004200.1,BTA018414.1,BTA003893.1,BTA018346.1,BTA007577.1,BTA021955.1;support_id=CUFF92.66.2,BTA022051.1,BTA001484.1,BTA003668.1,BTA016166.1,BTA001194.1,BTA013266.1,BTA020324.1,BTA009160.1,BTA025544.1,BTA017589.2,BTA024053.1,BTA010956.1,BTA013258.1,BTA007411.1,BTA030030.3,BTA016043.1,BTA024801.1;support_id=CUFF102.342.2,BTA…
GO:0031412	gas vesicle organization	biological_process	0.3949	1	6	8211	9	14362	BTA009406.1,BTA023272.1,BTA006772.1,BTA010976.1,BTA011881.1,BTA003076.1
GO:0005246	calcium channel regulator activity	molecular_function	0.39534	1	9	8211	14	14362	BTA001998.1,BTA022824.1,BTA029253.1,BTA006015.1,BTA023269.1;support_id=CUFF96.269.1,BTA019493.1;support_id=CUFF81.23.1,BTA000443.2,BTA000015.1,BTA029264.1
GO:0031988	membrane-bounded vesicle	cellular_component	0.39675	1	41	8211	69	14362	BTA017093.1,BTA001364.1,BTA010834.1,BTA025695.1,BTA002679.1,BTA007279.1,BTA005950.1,BTA005418.1,BTA011591.1,BTA023521.1,BTA008635.1,BTA002604.1,BTA029464.1,BTA022528.1,BTA025540.3,BTA000036.2,BTA017507.1,BTA016708.1,BTA004620.1;support_id=CUFF20.433.2,BTA009557.1,BTA003933.1,BTA012508.1,BTA021476.1,BTA030126.1,BTA025375.1,BTA000946.1,BTA008208.1,BTA017518.1,BTA024826.3,BTA029261.1;support_id=CUFF…
GO:0004540	ribonuclease activity	molecular_function	0.39888	1	48	8211	81	14362	BTA005271.1,BTA028505.1,BTA023815.1,BTA003171.1,BTA029211.1;support_id=CUFF119.368.1,BTA013458.1,BTA021671.1,BTA021586.1,BTA020270.1,BTA026037.1,BTA002084.1,BTA027428.1,BTA014156.1,BTA029928.1,BTA015457.1,BTA006309.1,BTA022469.1,BTA008896.1;support_id=CUFF37.723.2,BTA008914.1,BTA009936.2,BTA003560.1,BTA007883.1,BTA019104.1,BTA010317.1,BTA002872.1,BTA001196.2,BTA018787.1,BTA018483.1,BTA012602.1,BT…
GO:0006260	DNA replication	biological_process	0.39997	1	229	8211	395	14362	BTA009423.1,BTA020454.1;support_id=CUFF85.301.1,BTA004526.1,BTA010209.1,BTA012786.1,BTA025016.1,BTA021367.2,BTA009126.1,BTA010272.1,BTA015751.1;support_id=CUFF67.35.1,BTA019341.1;support_id=CUFF80.322.1,BTA021471.1;support_id=CUFF89.562.1,BTA018447.1,BTA027579.1,BTA008543.1,BTA000871.3,BTA000399.1,BTA010789.1,BTA018401.1,BTA009066.1,BTA006516.1,BTA021341.1,BTA007523.2,BTA000214.1,BTA023523.1,BTA0…
GO:0051783	regulation of nuclear division	biological_process	0.40112	1	9	8211	14	14362	BTA026146.1,BTA012316.2,BTA007461.1,BTA001705.2,BTA022487.1,BTA027828.1,BTA001369.1,BTA029361.1,BTA023810.1
GO:0009360	DNA polymerase III complex	cellular_component	0.40114	1	9	8211	14	14362	BTA023361.1,BTA019284.1,BTA008957.2;support_id=CUFF38.172.2,BTA030015.1,BTA029565.1,BTA006512.1;support_id=CUFF28.132.1,BTA016178.1,BTA013160.1,BTA009423.1
GO:0042575	DNA polymerase complex	cellular_component	0.40114	1	9	8211	14	14362	BTA008957.2;support_id=CUFF38.172.2,BTA019284.1,BTA023361.1,BTA009423.1,BTA013160.1,BTA016178.1,BTA006512.1;support_id=CUFF28.132.1,BTA029565.1,BTA030015.1
GO:0004068	aspartate 1-decarboxylase activity	molecular_function	0.40168	1	3	8211	4	14362	BTA001894.1,BTA022306.1,BTA005537.1
GO:0006522	alanine metabolic process	biological_process	0.40168	1	3	8211	4	14362	BTA001894.1,BTA005537.1,BTA022306.1
GO:0006523	alanine biosynthetic process	biological_process	0.40168	1	3	8211	4	14362	BTA022306.1,BTA005537.1,BTA001894.1
GO:0009078	pyruvate family amino acid metabolic process	biological_process	0.40168	1	3	8211	4	14362	BTA005537.1,BTA022306.1,BTA001894.1
GO:0009079	pyruvate family amino acid biosynthetic process	biological_process	0.40168	1	3	8211	4	14362	BTA001894.1,BTA005537.1,BTA022306.1
GO:0007281	germ cell development	biological_process	0.40178	1	16	8211	26	14362	BTA029395.1,BTA021039.1;support_id=CUFF87.585.1,BTA014782.1;support_id=CUFF61.626.1,BTA016017.1,BTA001309.1,BTA011210.1,BTA023255.1,BTA014297.1,BTA014089.3,BTA026573.1,BTA020698.1,BTA012945.1,BTA003784.1;support_id=CUFF17.316.1,BTA008534.1,BTA026114.1;support_id=CUFF107.558.1,BTA013650.1
GO:0019887	protein kinase regulator activity	molecular_function	0.40403	1	17	8211	28	14362	BTA007376.1,BTA025250.1,BTA008132.1,BTA023583.1,BTA015556.1,BTA015558.1,BTA008377.1,BTA007666.1,BTA015555.1,BTA018809.1,BTA005598.1,BTA000111.1,BTA007374.1,BTA010206.1,BTA014884.1,BTA027912.1,BTA004719.1
GO:0006954	inflammatory response	biological_process	0.40404	1	6	8211	9	14362	BTA004509.1,BTA017992.1;support_id=CUFF75.997.1,BTA011867.1,BTA001895.1,BTA006694.1,BTA028936.1
GO:0051090	regulation of sequence-specific DNA binding transcription factor activity	biological_process	0.40507	1	9	8211	14	14362	BTA023141.1,BTA003237.1,BTA019985.1,BTA005136.1,BTA020859.2,BTA024581.1,BTA024065.1,BTA002007.1,BTA024476.1
GO:0004550	nucleoside diphosphate kinase activity	molecular_function	0.40679	1	3	8211	4	14362	BTA002013.1,BTA027970.1,BTA002736.1
GO:0006183	GTP biosynthetic process	biological_process	0.40679	1	3	8211	4	14362	BTA002736.1,BTA002013.1,BTA027970.1
GO:0006228	UTP biosynthetic process	biological_process	0.40679	1	3	8211	4	14362	BTA002013.1,BTA027970.1,BTA002736.1
GO:0006241	CTP biosynthetic process	biological_process	0.40679	1	3	8211	4	14362	BTA027970.1,BTA002013.1,BTA002736.1
GO:0009148	pyrimidine nucleoside triphosphate biosynthetic process	biological_process	0.40679	1	3	8211	4	14362	BTA002736.1,BTA002013.1,BTA027970.1
GO:0009208	pyrimidine ribonucleoside triphosphate metabolic process	biological_process	0.40679	1	3	8211	4	14362	BTA027970.1,BTA002013.1,BTA002736.1
GO:0009209	pyrimidine ribonucleoside triphosphate biosynthetic process	biological_process	0.40679	1	3	8211	4	14362	BTA002736.1,BTA027970.1,BTA002013.1
GO:0046036	CTP metabolic process	biological_process	0.40679	1	3	8211	4	14362	BTA002736.1,BTA027970.1,BTA002013.1
GO:0046039	GTP metabolic process	biological_process	0.40679	1	3	8211	4	14362	BTA002736.1,BTA027970.1,BTA002013.1
GO:0046051	UTP metabolic process	biological_process	0.40679	1	3	8211	4	14362	BTA002013.1,BTA027970.1,BTA002736.1
GO:0046132	pyrimidine ribonucleoside biosynthetic process	biological_process	0.40679	1	3	8211	4	14362	BTA002013.1,BTA027970.1,BTA002736.1
GO:0046134	pyrimidine nucleoside biosynthetic process	biological_process	0.40679	1	3	8211	4	14362	BTA002736.1,BTA002013.1,BTA027970.1
GO:0044255	cellular lipid metabolic process	biological_process	0.40791	1	191	8211	329	14362	BTA027753.1,BTA000343.1,BTA003108.1,BTA027811.1,BTA013454.1,BTA021458.1,BTA020621.1,BTA002146.1,BTA012560.1,BTA020279.1,BTA003107.1,BTA006073.1,BTA005276.1,BTA006447.2,BTA003154.1,BTA018355.1,BTA005226.1,BTA018681.1,BTA001287.2,BTA030182.1,BTA000515.1,BTA012257.4,BTA027785.1,BTA008549.1,BTA017512.1,BTA002977.1,BTA000908.1,BTA028693.3,BTA004916.1,BTA023269.1,BTA021301.1,BTA014370.1,BTA018969.2,BTA…
GO:0005618	cell wall	cellular_component	0.408	1	6	8211	9	14362	BTA029405.1;support_id=CUFF120.341.1,BTA016049.1,BTA020599.1,BTA020701.1;support_id=CUFF86.373.1,BTA010885.1,BTA015631.1
GO:0008616	queuosine biosynthetic process	biological_process	0.40801	1	6	8211	9	14362	BTA022091.1,BTA011186.2,BTA000460.1,BTA023615.1,BTA004820.1,BTA025865.1
GO:0046116	queuosine metabolic process	biological_process	0.40801	1	6	8211	9	14362	BTA000460.1,BTA011186.2,BTA023615.1,BTA022091.1,BTA004820.1,BTA025865.1
GO:0006955	immune response	biological_process	0.40821	1	45	8211	76	14362	BTA014805.1,BTA029269.1,BTA014314.1,BTA017134.1,BTA024249.1,BTA026265.1;support_id=CUFF108.147.1,BTA005145.1,BTA005890.1,BTA014275.1,BTA012344.1,BTA010521.1;support_id=CUFF44.309.1,BTA011573.1;support_id=CUFF48.497.1,BTA013048.1,BTA030080.1;support_id=CUFF124.202.1,BTA001895.1,BTA007657.1,BTA005481.1,BTA001218.1,BTA023054.1,BTA017992.1;support_id=CUFF75.997.1,BTA030183.1,BTA027527.1,BTA021074.1;s…
GO:0004869	cysteine-type endopeptidase inhibitor activity	molecular_function	0.40876	1	3	8211	4	14362	BTA013048.1,BTA010384.1,BTA010383.1
GO:0007155	cell adhesion	biological_process	0.40882	1	82	8211	140	14362	BTA018162.1,BTA009554.1,BTA009059.1,BTA025147.1,BTA015386.1,BTA008468.1,BTA024259.1,BTA000239.1;support_id=CUFF2.194.1,BTA017222.1,BTA025550.1,BTA010817.1;support_id=CUFF46.150.1,BTA028038.1,BTA000263.1,BTA013577.1,BTA019845.1,BTA007837.2,BTA026879.1,BTA008366.1,BTA014153.1,BTA020209.1,BTA011894.1,BTA029394.1,BTA023021.1,BTA008692.1,BTA013569.1,BTA001148.1,BTA017858.1,BTA025608.1,BTA009661.1,BTA0…
GO:0004366	glycerol-3-phosphate O-acyltransferase activity	molecular_function	0.4095	1	3	8211	4	14362	BTA006352.1,BTA023825.1,BTA018683.1
GO:0005048	signal sequence binding	molecular_function	0.41016	1	6	8211	9	14362	BTA010453.1,BTA008029.1,BTA004651.1,BTA010524.1,BTA024732.1,BTA003678.2
GO:0030151	molybdenum ion binding	molecular_function	0.41109	1	6	8211	9	14362	BTA023278.1,BTA000743.1,BTA010323.1;support_id=CUFF43.498.2,BTA023662.1,BTA026441.1,BTA020425.1
GO:0019363	pyridine nucleotide biosynthetic process	biological_process	0.41174	1	13	8211	21	14362	BTA010938.1,BTA020941.1,BTA001527.1,BTA021924.1,BTA023447.1,BTA008367.1,BTA020949.1,BTA001197.1,BTA020661.1,BTA007219.2,BTA000506.1,BTA004831.1,BTA018372.1
GO:0004620	phospholipase activity	molecular_function	0.4126	1	13	8211	21	14362	BTA001431.1,BTA018809.1,BTA017143.1,BTA019531.1,BTA020136.1,BTA009477.1,BTA017819.1,BTA024420.1,BTA019814.1,BTA009410.1,BTA000365.1,BTA001467.1,BTA008004.1
GO:0000781	chromosome, telomeric region	cellular_component	0.41322	1	6	8211	9	14362	BTA011172.1,BTA003248.1,BTA002094.1,BTA002145.1,BTA019288.1,BTA028573.3
GO:0006810	transport	biological_process	0.41329	1	1317	8211	2291	14362	BTA019245.1,BTA005523.1,BTA020481.1,BTA006142.1,BTA023232.1,BTA013367.1,BTA018069.1;support_id=CUFF76.115.1,BTA020702.2,BTA003842.1;support_id=CUFF17.464.1,BTA001331.1;support_id=CUFF5.63.2,BTA023639.1,BTA020949.1,BTA025544.1,BTA004775.1,BTA020067.1,BTA001164.1,BTA027426.1,BTA020125.1,BTA017640.1,BTA019668.1,BTA017595.1,BTA016401.1,BTA013358.1,BTA014855.1,BTA004718.1,BTA003260.2,BTA002749.1,BTA00…
GO:0006480	N-terminal protein amino acid methylation	biological_process	0.41455	1	6	8211	9	14362	BTA023385.1,BTA019053.1,BTA016347.1,BTA006756.1,BTA001161.1,BTA029954.2
GO:0031365	N-terminal protein amino acid modification	biological_process	0.41455	1	6	8211	9	14362	BTA019053.1,BTA016347.1,BTA023385.1,BTA029954.2,BTA001161.1,BTA006756.1
GO:0003879	ATP phosphoribosyltransferase activity	molecular_function	0.41479	1	3	8211	4	14362	BTA023322.1,BTA025415.1,BTA006704.1
GO:0006106	fumarate metabolic process	biological_process	0.41486	1	3	8211	4	14362	BTA018486.1,BTA011719.1,BTA028160.1
GO:0006721	terpenoid metabolic process	biological_process	0.41541	1	41	8211	69	14362	BTA022908.1,BTA001472.1,BTA019496.1,BTA000670.1,BTA007014.1,BTA022189.1,BTA028083.1,BTA020902.1,BTA027040.1,BTA015558.1,BTA027042.1,BTA024535.1,BTA022309.1,BTA023304.1,BTA005938.1,BTA003202.1,BTA003201.1,BTA016916.1,BTA024278.1,BTA023899.1,BTA007301.1,BTA013454.1,BTA000674.1,BTA018339.1,BTA006073.1,BTA000230.1;support_id=CUFF2.165.1,BTA021411.1,BTA021578.1,BTA027785.1,BTA016527.1,BTA013390.1,BTA0…
GO:0016114	terpenoid biosynthetic process	biological_process	0.41541	1	41	8211	69	14362	BTA005938.1,BTA023304.1,BTA022309.1,BTA024535.1,BTA024278.1,BTA016916.1,BTA003202.1,BTA003201.1,BTA001472.1,BTA022908.1,BTA027042.1,BTA015558.1,BTA027040.1,BTA020902.1,BTA028083.1,BTA022189.1,BTA007014.1,BTA000670.1,BTA019496.1,BTA008354.1,BTA006928.1,BTA000908.1,BTA021300.1,BTA023455.1,BTA013390.1,BTA016527.1,BTA027785.1,BTA000515.1,BTA007016.1,BTA003200.1,BTA018355.1,BTA009862.1,BTA006073.1,BTA…
GO:0065009	regulation of molecular function	biological_process	0.41632	1	61	8211	104	14362	BTA016815.1,BTA020360.1,BTA010971.1,BTA013731.1,BTA019985.1,BTA000370.1,BTA025611.2,BTA019979.1,BTA015558.1,BTA005136.1,BTA000461.1,BTA022401.1,BTA019967.1,BTA024065.1,BTA001331.1,BTA023874.1,BTA009783.2;support_id=CUFF42.60.1,BTA029510.1,BTA022297.1,BTA015898.1,BTA020269.1,BTA000111.1,BTA024581.1,BTA010751.1,BTA027828.1,BTA002007.1,BTA024476.1,BTA026575.1,BTA002734.1,BTA025459.1,BTA011187.2,BTA0…
GO:0016846	carbon-sulfur lyase activity	molecular_function	0.41666	1	13	8211	21	14362	BTA022266.1,BTA007461.1,BTA003312.1,BTA001829.1,BTA023316.1,BTA022945.1;support_id=CUFF95.15.2,BTA024283.1,BTA000019.1,BTA004911.1,BTA001705.2,BTA023765.1,BTA001396.1,BTA000013.1
GO:0016833	oxo-acid-lyase activity	molecular_function	0.41676	1	6	8211	9	14362	BTA000645.1,BTA004320.1,BTA028711.1,BTA001197.1,BTA018400.1,BTA023473.1
GO:0004198	calcium-dependent cysteine-type endopeptidase activity	molecular_function	0.41692	1	6	8211	9	14362	BTA015756.1,BTA007714.1,BTA028736.2,BTA002840.2,BTA006367.1,BTA019461.1
GO:0005310	dicarboxylic acid transmembrane transporter activity	molecular_function	0.41721	1	13	8211	21	14362	BTA023425.1,BTA021471.1;support_id=CUFF89.562.1,BTA002965.1,BTA029738.1,BTA023952.1,BTA006033.1,BTA006914.1,BTA002006.1,BTA025433.1,BTA006031.1,BTA029737.1,BTA011100.1,BTA023628.1
GO:0010639	negative regulation of organelle organization	biological_process	0.41722	1	13	8211	21	14362	BTA029084.1,BTA011796.1,BTA007461.1,BTA029098.1,BTA029737.1,BTA029361.1,BTA021474.1,BTA012679.1,BTA001705.2,BTA025651.1,BTA027828.1,BTA027151.1,BTA001369.1
GO:0033202	DNA helicase complex	cellular_component	0.41747	1	3	8211	4	14362	BTA028691.1,BTA024623.1,BTA000870.1
GO:0004298	threonine-type endopeptidase activity	molecular_function	0.41779	1	10	8211	16	14362	BTA027547.1,BTA005813.1,BTA023259.1,BTA020149.1,BTA020149.1;support_id=CUFF84.42.3,BTA013666.1,BTA027174.1,BTA014244.1,BTA027569.1,BTA013400.1
GO:0070003	threonine-type peptidase activity	molecular_function	0.41779	1	10	8211	16	14362	BTA020149.1,BTA020149.1;support_id=CUFF84.42.3,BTA023259.1,BTA027547.1,BTA005813.1,BTA027174.1,BTA013400.1,BTA027569.1,BTA014244.1,BTA013666.1
GO:0098800	inner mitochondrial membrane protein complex	cellular_component	0.41795	1	42	8211	71	14362	BTA021534.2;support_id=CUFF89.776.2,BTA004882.1,BTA013064.1,BTA006914.1,BTA020035.1,BTA007295.1,BTA018319.1,BTA013656.1,BTA009264.1,BTA026055.1,BTA020155.1,BTA008033.1,BTA013681.1;support_id=CUFF57.246.2,BTA028838.1,BTA009531.1,BTA023808.1,BTA008540.1,BTA019450.1,BTA011358.1;support_id=CUFF48.12.4,BTA026982.1,BTA006772.1,BTA019460.1,BTA009058.1,BTA016180.1,BTA007848.1,BTA014855.1,BTA013611.1,BTA0…
GO:0017025	TBP-class protein binding	molecular_function	0.4181	1	6	8211	9	14362	BTA021075.1,BTA020099.1,BTA004830.1,BTA005132.1,BTA009312.1,BTA003282.1
GO:0004109	coproporphyrinogen oxidase activity	molecular_function	0.41864	1	3	8211	4	14362	BTA027323.1,BTA016540.1,BTA025620.1;support_id=CUFF105.400.2
GO:0000275	mitochondrial proton-transporting ATP synthase complex, catalytic core F(1)	cellular_component	0.41878	1	6	8211	9	14362	BTA007848.1,BTA008838.1,BTA019450.1,BTA019460.1,BTA021534.2;support_id=CUFF89.776.2,BTA025566.1
GO:0032994	protein-lipid complex	cellular_component	0.41886	1	3	8211	4	14362	BTA021379.1,BTA020136.1,BTA001699.2;support_id=CUFF6.254.1
GO:0034358	plasma lipoprotein particle	cellular_component	0.41886	1	3	8211	4	14362	BTA001699.2;support_id=CUFF6.254.1,BTA020136.1,BTA021379.1
GO:0042627	chylomicron	cellular_component	0.41886	1	3	8211	4	14362	BTA001699.2;support_id=CUFF6.254.1,BTA021379.1,BTA020136.1
GO:1990777	lipoprotein particle	cellular_component	0.41886	1	3	8211	4	14362	BTA020136.1,BTA021379.1,BTA001699.2;support_id=CUFF6.254.1
GO:0009101	glycoprotein biosynthetic process	biological_process	0.41893	1	38	8211	64	14362	BTA027382.1,BTA019628.2,BTA023811.1,BTA012603.1,BTA024463.1,BTA012192.1,BTA026005.1,BTA016959.2,BTA023661.1,BTA024038.1,BTA006420.1,BTA021028.2,BTA016326.1,BTA020226.1,BTA010452.1,BTA005229.1,BTA011081.1,BTA018495.1,BTA030091.1,BTA004490.1;support_id=CUFF20.170.2,BTA027663.1,BTA020620.1,BTA028994.1,BTA030090.1,BTA007732.2,BTA005138.1,BTA001745.1,BTA014870.1,BTA019574.1,BTA011083.1,BTA011916.2,BTA…
GO:0005788	endoplasmic reticulum lumen	cellular_component	0.41898	1	3	8211	4	14362	BTA020552.1,BTA017590.1,BTA011649.1
GO:0033180	proton-transporting V-type ATPase, V1 domain	cellular_component	0.41923	1	20	8211	33	14362	BTA014720.1,BTA004057.1,BTA022767.1,BTA024047.1,BTA024806.1,BTA001188.2,BTA005419.2,BTA029770.1,BTA006073.1,BTA029078.1,BTA024822.1,BTA013524.1,BTA008317.1,BTA011431.1,BTA028693.3,BTA015367.1,BTA023291.1,BTA006777.1,BTA024873.1,BTA011737.1
GO:0004066	asparagine synthase (glutamine-hydrolyzing) activity	molecular_function	0.41924	1	6	8211	9	14362	BTA022303.1,BTA022006.1,BTA021750.1,BTA009058.1,BTA000692.1,BTA026728.3
GO:0006528	asparagine metabolic process	biological_process	0.41924	1	6	8211	9	14362	BTA000692.1,BTA026728.3,BTA022303.1,BTA022006.1,BTA021750.1,BTA009058.1
GO:0006529	asparagine biosynthetic process	biological_process	0.41924	1	6	8211	9	14362	BTA021750.1,BTA009058.1,BTA022303.1,BTA022006.1,BTA026728.3,BTA000692.1
GO:0009894	regulation of catabolic process	biological_process	0.41959	1	31	8211	52	14362	BTA028129.1,BTA023810.1,BTA005515.1,BTA008318.1,BTA025453.1,BTA006565.1,BTA014770.3,BTA006256.1,BTA026451.1,BTA011443.1,BTA022920.1,BTA029361.1,BTA006638.1,BTA003076.1,BTA022487.1,BTA006125.1,BTA025916.2,BTA001326.1,BTA026237.1,BTA027828.1,BTA012316.2,BTA020899.2,BTA015600.1,BTA010190.1,BTA025655.1,BTA019147.1,BTA016168.1,BTA026146.1,BTA006641.1,BTA007911.1,BTA026838.1
GO:0000288	nuclear-transcribed mRNA catabolic process, deadenylation-dependent decay	biological_process	0.41969	1	3	8211	4	14362	BTA027630.1,BTA017547.1,BTA008360.1
GO:0000290	deadenylation-dependent decapping of nuclear-transcribed mRNA	biological_process	0.41969	1	3	8211	4	14362	BTA027630.1,BTA008360.1,BTA017547.1
GO:0050532	2-phosphosulfolactate phosphatase activity	molecular_function	0.41974	1	3	8211	4	14362	BTA028176.1,BTA009266.1,BTA003200.1
GO:0006694	steroid biosynthetic process	biological_process	0.41989	1	39	8211	66	14362	BTA020767.1,BTA000559.1,BTA003108.1,BTA026326.1,BTA000300.1,BTA007838.1,BTA022394.4;support_id=CUFF93.65.1,BTA003107.1,BTA015064.1,BTA007020.1,BTA018726.1,BTA022299.1,BTA006136.1,BTA022558.1,BTA028011.1,BTA005973.1,BTA010605.1,BTA021140.1,BTA017246.1,BTA005557.1,BTA009015.1,BTA018699.1,BTA024923.1,BTA023202.1,BTA017211.1,BTA018876.1,BTA026013.1,BTA026861.1,BTA006930.1,BTA011434.1,BTA003663.1,BTA0…
GO:0050151	oleate hydratase activity	molecular_function	0.42027	1	6	8211	9	14362	BTA010956.1,BTA018355.1,BTA020902.1,BTA018346.1,BTA000515.1,BTA001337.1
GO:0019634	organic phosphonate metabolic process	biological_process	0.42056	1	3	8211	4	14362	BTA029497.1,BTA026929.1,BTA029665.1
GO:0042470	melanosome	cellular_component	0.42084	1	3	8211	4	14362	BTA021476.1,BTA006397.1,BTA008208.1
GO:0048770	pigment granule	cellular_component	0.42084	1	3	8211	4	14362	BTA021476.1,BTA006397.1,BTA008208.1
GO:0006887	exocytosis	biological_process	0.4209	1	20	8211	33	14362	BTA015105.1,BTA018069.1;support_id=CUFF76.115.1,BTA013247.5,BTA011739.1,BTA029918.1,BTA027841.1,BTA018896.1,BTA001615.1,BTA025375.1,BTA010994.1,BTA028523.1,BTA005229.1,BTA011571.1,BTA027064.1;support_id=CUFF111.431.2,BTA012946.1;support_id=CUFF54.424.1,BTA004904.1,BTA010456.1;support_id=CUFF44.141.1,BTA018490.1,BTA010521.1;support_id=CUFF44.309.1,BTA010999.1
GO:0009341	beta-galactosidase complex	cellular_component	0.42095	1	6	8211	9	14362	BTA028949.1,BTA027840.1,BTA029754.1;support_id=CUFF121.964.1,BTA028245.1,BTA026433.1,BTA027227.1;support_id=CUFF112.103.2
GO:0031099	regeneration	biological_process	0.42175	1	3	8211	4	14362	BTA009059.1,BTA012550.1,BTA015760.1
GO:0042246	tissue regeneration	biological_process	0.42175	1	3	8211	4	14362	BTA012550.1,BTA009059.1,BTA015760.1
GO:0048589	developmental growth	biological_process	0.42175	1	3	8211	4	14362	BTA015760.1,BTA009059.1,BTA012550.1
GO:0034508	centromere complex assembly	biological_process	0.42182	1	21	8211	35	14362	BTA000415.1,BTA015620.1;support_id=CUFF66.335.2,BTA017357.1,BTA004397.1,BTA023888.1;support_id=CUFF98.271.1,BTA002690.1,BTA009655.1,BTA026295.2,BTA020043.1,BTA012977.1,BTA020083.1,BTA022135.1,BTA001737.1,BTA025544.1,BTA004232.1,BTA023383.1,BTA019923.1,BTA014580.1,BTA011213.1;support_id=CUFF47.367.1,BTA018468.3,BTA026707.1
GO:0016247	channel regulator activity	molecular_function	0.42198	1	35	8211	59	14362	BTA024337.1,BTA027623.3,BTA022079.1,BTA008362.2,BTA006015.1,BTA027398.1,BTA023269.1;support_id=CUFF96.269.1,BTA019493.1;support_id=CUFF81.23.1,BTA000386.1,BTA006997.2,BTA002784.1,BTA012828.2,BTA003263.1,BTA006928.1,BTA020219.1,BTA028719.1,BTA018734.1,BTA001998.1,BTA000443.2,BTA017646.1,BTA026265.1;support_id=CUFF108.147.1,BTA016060.1;support_id=CUFF69.88.2,BTA001435.1,BTA029264.1,BTA029253.1,BTA0…
GO:0016842	amidine-lyase activity	molecular_function	0.42207	1	3	8211	4	14362	BTA018716.1,BTA029582.2,BTA016610.1
GO:0006855	drug transmembrane transport	biological_process	0.42247	1	6	8211	9	14362	BTA020481.1,BTA028080.1,BTA019770.2,BTA006880.1,BTA011388.1,BTA012552.1
GO:0015893	drug transport	biological_process	0.42247	1	6	8211	9	14362	BTA011388.1,BTA006880.1,BTA012552.1,BTA028080.1,BTA019770.2,BTA020481.1
GO:0042493	response to drug	biological_process	0.42247	1	6	8211	9	14362	BTA020481.1,BTA019770.2,BTA028080.1,BTA012552.1,BTA006880.1,BTA011388.1
GO:0019001	guanyl nucleotide binding	molecular_function	0.4226	1	226	8211	391	14362	BTA019533.1,BTA009608.1,BTA000641.1,BTA022262.1,BTA021816.1,BTA009563.1,BTA006712.2,BTA007555.2,BTA005594.1,BTA022312.1,BTA024801.1;support_id=CUFF102.342.2,BTA013821.1,BTA027385.1,BTA029352.1,BTA000359.1,BTA024630.4,BTA029099.1,BTA022227.1,BTA023379.1,BTA030056.1,BTA001616.1,BTA017038.1,BTA003158.1,BTA019408.1,BTA029661.1,BTA002479.1,BTA013864.1,BTA022388.1,BTA005000.1;support_id=CUFF22.5.1,BTA0…
GO:0032561	guanyl ribonucleotide binding	molecular_function	0.4226	1	226	8211	391	14362	BTA003006.1,BTA009528.1,BTA017043.1,BTA018190.1,BTA000415.1,BTA000821.1,BTA006565.1,BTA021674.1,BTA024996.1,BTA000844.1,BTA006319.2,BTA024732.1,BTA023529.1,BTA018419.1,BTA016162.1,BTA020569.1,BTA003232.1,BTA022510.1,BTA012266.1,BTA009143.1,BTA024292.2,BTA021498.2,BTA023866.1,BTA023919.1,BTA004618.1,BTA028063.1,BTA021973.1,BTA000945.1,BTA001694.1,BTA002843.1,BTA002687.1,BTA027109.2,BTA002049.1,BTA…
GO:0008201	heparin binding	molecular_function	0.42273	1	3	8211	4	14362	BTA029995.1,BTA029209.1,BTA014158.2
GO:0072511	divalent inorganic cation transport	biological_process	0.42366	1	46	8211	78	14362	BTA010658.1,BTA014967.1,BTA022824.1,BTA011951.1,BTA024039.1,BTA002687.1,BTA001694.1,BTA027704.2,BTA029122.3,BTA001407.1,BTA018414.1,BTA000015.1,BTA027545.1,BTA012852.1,BTA002708.1,BTA029264.1,BTA006319.2,BTA024996.1,BTA029882.1,BTA021674.1,BTA026190.1,BTA019460.1,BTA009348.1,BTA011417.1,BTA004872.1,BTA001998.1,BTA014562.1,BTA022312.1,BTA028046.1,BTA023697.1,BTA029099.1,BTA022315.1,BTA011872.1,BTA…
GO:0016799	hydrolase activity, hydrolyzing N-glycosyl compounds	molecular_function	0.42465	1	13	8211	21	14362	BTA011950.1,BTA013613.1,BTA004014.1,BTA017740.1,BTA008191.1;support_id=CUFF34.631.1,BTA016848.2;support_id=CUFF72.270.1,BTA009932.1,BTA013542.1,BTA004291.1,BTA010343.2,BTA012897.1,BTA006067.1;support_id=CUFF26.309.1,BTA017725.1
GO:0019866	organelle inner membrane	cellular_component	0.42479	1	61	8211	104	14362	BTA006172.1,BTA028178.1,BTA003842.1;support_id=CUFF17.464.1,BTA018445.1,BTA001571.2,BTA010679.1,BTA006464.1,BTA030183.1,BTA005669.2,BTA003973.1;support_id=CUFF18.271.1,BTA008838.1,BTA026530.1,BTA011719.1,BTA005254.1,BTA025566.1,BTA013611.1,BTA011512.1,BTA014855.1,BTA013665.1,BTA026401.1,BTA018184.1,BTA026982.1,BTA003068.1;support_id=CUFF13.29.1,BTA003292.1,BTA010823.1;support_id=CUFF46.164.2,BTA0…
GO:0072686	mitotic spindle	cellular_component	0.42483	1	24	8211	40	14362	BTA029464.1,BTA030028.1,BTA005534.1,BTA018727.1,BTA014443.1,BTA011244.1,BTA012267.1,BTA004032.1,BTA002147.1;support_id=CUFF9.207.1,BTA006074.1,BTA018069.1;support_id=CUFF76.115.1,BTA011523.1,BTA017587.1,BTA021829.2;support_id=CUFF90.627.1,BTA011278.1,BTA018546.1,BTA008129.2,BTA027329.2,BTA019773.1,BTA016967.1,BTA022394.4;support_id=CUFF93.65.1,BTA030022.1,BTA020008.2,BTA004022.1
GO:0071855	neuropeptide receptor binding	molecular_function	0.42594	1	3	8211	4	14362	BTA026817.3,BTA017365.1,BTA020319.1
GO:0004799	thymidylate synthase activity	molecular_function	0.42621	1	3	8211	4	14362	BTA025560.1,BTA019457.2,BTA025372.1
GO:0008203	cholesterol metabolic process	biological_process	0.42663	1	3	8211	4	14362	BTA002988.4,BTA028305.1,BTA002970.1
GO:1902652	secondary alcohol metabolic process	biological_process	0.42663	1	3	8211	4	14362	BTA002970.1,BTA028305.1,BTA002988.4
GO:0016160	amylase activity	molecular_function	0.4273	1	3	8211	4	14362	BTA021955.1;support_id=CUFF92.66.2,BTA010385.1;support_id=CUFF43.665.2,BTA009752.1
GO:0050829	defense response to Gram-negative bacterium	biological_process	0.42758	1	3	8211	4	14362	BTA026458.3,BTA021589.1,BTA007170.1
GO:0009605	response to external stimulus	biological_process	0.4278	1	89	8211	153	14362	BTA026265.1;support_id=CUFF108.147.1,BTA007556.1,BTA011942.1,BTA016814.1,BTA019619.1,BTA011821.1,BTA007891.1,BTA029862.1,BTA009037.1,BTA010451.1;support_id=CUFF44.134.2,BTA023461.1,BTA010816.2,BTA001520.1,BTA026299.1,BTA019417.1,BTA026135.1,BTA025459.1,BTA022738.1,BTA002105.1,BTA023507.1;support_id=CUFF97.98.1,BTA000266.1,BTA012179.1,BTA019084.1,BTA020771.1,BTA002995.1,BTA006830.1,BTA024549.1,BTA…
GO:0042151	nematocyst	cellular_component	0.42843	1	3	8211	4	14362	BTA018099.1,BTA026265.1;support_id=CUFF108.147.1,BTA000386.1
GO:0046870	cadmium ion binding	molecular_function	0.42851	1	3	8211	4	14362	BTA003390.1,BTA029534.1,BTA003409.1
GO:0009424	bacterial-type flagellum hook	cellular_component	0.42885	1	3	8211	4	14362	BTA023019.1;support_id=CUFF95.199.1,BTA011821.1,BTA022072.1
GO:0009425	bacterial-type flagellum basal body	cellular_component	0.42933	1	3	8211	4	14362	BTA006381.1,BTA021705.1,BTA013206.1
GO:0042597	periplasmic space	cellular_component	0.42937	1	13	8211	21	14362	BTA015323.1;support_id=CUFF65.89.2,BTA028543.1;support_id=CUFF117.202.1,BTA008866.1,BTA016121.1,BTA025682.1,BTA019814.1,BTA018026.1,BTA027535.1,BTA008865.1,BTA024027.1,BTA028485.1,BTA000263.1;support_id=CUFF2.269.1,BTA024929.1
GO:0003919	FMN adenylyltransferase activity	molecular_function	0.42948	1	3	8211	4	14362	BTA013427.1,BTA029887.1,BTA015353.1
GO:0006898	receptor-mediated endocytosis	biological_process	0.42993	1	3	8211	4	14362	BTA023205.1;support_id=CUFF96.108.1,BTA005349.1;support_id=CUFF23.292.1,BTA015901.1
GO:0000213	tRNA-intron endonuclease activity	molecular_function	0.43021	1	3	8211	4	14362	BTA021586.1,BTA008914.1,BTA006067.1;support_id=CUFF26.309.1
[truncated: 2,814 more rows]
